# Supplementary material for: Single-nucleus and single-cell transcriptomes compared in matched cortical cell types
Source: PLoS One. 2018 Dec 26;13(12):e0209648. doi: 10.1371/journal.pone.0209648 (PMC6306246; doi:10.1371/journal.pone.0209648)
Supplement: S4 Table — (XLSX) [file pone.0209648.s009.xlsx]

## Sheet: S3_Table
gene	logFC	AveExpr	t	P.Value	adj.P.Val	B
0610005C13RIK	0.0224201	0.0390376	1.04079	0.298243	0.549456	-8.83436
0610006L08RIK	0.00215983	0.00107991	1.00016	0.317497	0.549456	-8.87583
0610007P14RIK	3.21747	4.12215	19.3284	3.59756e-70	1.05818e-68	147.66
0610009B22RIK	2.94899	2.88229	16.5696	3.43547e-54	6.42475e-53	110.942
0610009E02RIK	0.0638567	0.40858	0.899249	0.368754	0.623166	-8.97166
0610009L18RIK	0.891987	0.698387	8.9893	1.37717e-18	9.3844e-18	29.3972
0610010B08RIK	0.00431965	0.00431965	1.0018	0.316701	0.549456	-8.87418
0610010F05RIK	0.847692	5.71745	4.85635	1.40358e-06	5.99315e-06	2.27971
0610010K14RIK	3.26993	2.94183	21.6477	2.1806e-84	9.6616e-83	180.352
0610011F06RIK	1.36909	4.08714	7.55954	9.73452e-14	5.64283e-13	18.3766
0610012G03RIK	3.12967	4.88323	17.4813	2.44094e-59	5.25779e-58	122.768
0610025J13RIK	0.0196769	0.0228933	1.11337	0.265838	0.536595	-8.75621
0610030E20RIK	0.634214	3.04712	3.53891	0.000421797	0.00151594	-3.15003
0610031O16RIK	0	0	0	1	1	-9.37622
0610037L13RIK	1.3042	4.71023	7.32682	5.13364e-13	2.89279e-12	16.7407
0610038B21RIK	0.234698	0.804855	2.36525	0.0182235	0.0534227	-6.58462
0610039H22RIK	-0.0264267	0.456767	-0.287241	0.773992	1	-9.33493
0610039K10RIK	0.277303	1.87284	2.29845	0.0217589	0.0628784	-6.73965
0610040B10RIK	0.4886	0.49673	5.96971	3.38494e-09	1.64083e-08	8.12525
0610040F04RIK	0.879378	1.03413	8.03028	2.94645e-15	1.79727e-14	21.8229
0610040J01RIK	0.170989	0.259435	2.39956	0.016612	0.049072	-6.50331
0610043K17RIK	0.14971	0.317476	2.11129	0.0350151	0.0968164	-7.15055
1010001N08RIK	0.00558307	0.101452	0.253045	0.80029	1	-9.34417
1100001I12RIK	0	0	0	1	1	-9.37622
1110002J07RIK	0.203135	0.216092	3.36479	0.000797548	0.00279651	-3.74403
1110002L01RIK	2.78878	4.9329	17.8415	2.06538e-61	4.74574e-60	127.53
1110002O04RIK	0.375698	0.533316	3.5819	0.000358898	0.00129888	-2.9989
1110004E09RIK	4.24078	3.11953	31.212	1.24742e-146	3.29529e-144	323.598
1110004F10RIK	3.91521	5.6504	22.7388	2.9142e-91	1.57739e-89	196.163
1110006O24RIK	0.0988426	0.184582	1.70252	0.0889935	0.220375	-7.92773
1110007C09RIK	0.416613	0.907007	3.59112	0.000346606	0.00125699	-2.96625
1110008P14RIK	2.85584	7.4928	19.5037	3.18426e-71	9.6639e-70	150.081
1110015O18RIK	0.00799231	0.00399616	1.00018	0.317485	0.549456	-8.8758
1110017D15RIK	0.349879	0.638107	3.37578	0.00076673	0.00269272	-3.70739
1110018N20RIK	0.776068	2.43463	4.31349	1.77984e-05	7.1165e-05	-0.156209
1110019D14RIK	0.559763	0.84329	4.52605	6.79357e-06	2.78336e-05	0.764736
1110020A21RIK	0.350723	0.309513	4.73333	2.55424e-06	1.07393e-05	1.70358
1110025L11RIK	0	0	0	1	1	-9.37622
1110028F11RIK	-0.0147396	0.010793	-0.797629	0.425291	0.701752	-9.0579
1110028F18RIK	0	0	0	1	1	-9.37622
1110032A03RIK	3.14407	3.44947	17.9442	5.25779e-62	1.22418e-60	128.895
1110032F04RIK	1.97704	1.61054	12.9801	1.63779e-35	1.82375e-34	68.0871
1110034G24RIK	1.66447	1.2691	12.4654	4.45646e-33	4.63673e-32	62.5093
1110036E04RIK	0	0	0	1	1	-9.37622
1110037F02RIK	1.38929	4.20872	7.25971	8.22341e-13	4.60053e-12	16.2775
1110038B12RIK	1.48477	2.00441	9.75913	1.76013e-21	1.30758e-20	35.9929
1110038F14RIK	1.35774	4.05342	8.00353	3.61148e-15	2.19622e-14	21.6222
1110046J04RIK	1.12648	0.772498	11.1461	3.68454e-27	3.24925e-26	48.9661
1110051M20RIK	2.14297	6.37132	12.2559	4.17032e-32	4.22392e-31	60.2852
1110054M08RIK	0.239813	0.250073	4.34598	1.54027e-05	6.18507e-05	-0.0182092
1110057K04RIK	2.14865	2.96977	11.5374	7.27147e-29	6.75866e-28	52.8656
1110057P08RIK	0	0	0	1	1	-9.37622
1110058D11RIK	-0.0125556	0.0856903	-0.373716	0.708701	1	-9.30632
1110059E24RIK	3.08857	2.21875	19.305	4.96683e-70	1.45686e-68	147.338
1110059G10RIK	3.10053	2.90533	19.715	1.69403e-72	5.31796e-71	153.01
1110065P20RIK	2.8795	2.83792	18.3317	2.90006e-64	7.15275e-63	134.085
1190002F15RIK	-0.00215983	0.00107991	-1.00016	0.317497	0.549456	-8.87583
1190002N15RIK	1.68205	2.70226	8.42195	1.40226e-16	8.93086e-16	24.828
1190003K10RIK	0.0642647	0.0578297	2.00893	0.0448351	0.121388	-7.36068
1190005I06RIK	0.282439	0.250458	4.64554	3.88365e-06	1.61558e-05	1.30103
1190007I07RIK	2.25962	2.15483	16.2576	1.84023e-52	3.26829e-51	106.972
1190028D05RIK	0	0	0	1	1	-9.37622
1200014J11RIK	1.44589	2.05301	8.72685	1.20559e-17	7.97583e-17	27.2521
1300002E11RIK	1.19037	1.83805	7.77189	2.05453e-14	1.2187e-13	19.9086
1300017J02RIK	0.00342325	0.00171162	1.00017	0.317489	0.549456	-8.87581
1500002F19RIK	0.972849	0.980189	10.1075	7.48383e-23	5.78901e-22	39.1228
1500004A13RIK	1.76102	3.23307	11.6076	3.55825e-29	3.33387e-28	53.5758
1500009C09RIK	3.21441	2.30029	23.9123	9.30811e-99	6.26552e-97	213.408
1500009L16RIK	2.20279	1.87864	13.55	2.75835e-38	3.32832e-37	74.4443
1500011B03RIK	3.462	6.08642	19.088	9.8425e-69	2.80091e-67	144.357
1500011K16RIK	4.11258	3.45693	28.8918	2.66458e-131	4.70254e-129	288.306
1500012F01RIK	1.02982	3.62917	6.22122	7.46645e-10	3.72507e-09	9.60054
1500012K07RIK	0.19867	0.45951	2.96652	0.00308943	0.0101356	-4.99248
1500015A07RIK	0.905657	1.78611	5.21389	2.28205e-07	1.01325e-06	4.03361
1500015L24RIK	-0.0172664	0.00863321	-1.00018	0.317484	0.549456	-8.8758
1500015O10RIK	-0.032298	0.050601	-1.05341	0.292427	0.549456	-8.82115
1500017E21RIK	0.898177	2.85738	4.68545	3.21274e-06	1.34247e-05	1.48316
1500026H17RIK	1.15849	1.71623	8.25214	5.32872e-16	3.3292e-15	23.51
1500035N22RIK	0.417454	0.52122	4.64368	3.91794e-06	1.62936e-05	1.29259
1520401A03RIK	0.0250199	0.0579147	0.831501	0.405905	0.675833	-9.0303
1600002D24RIK	0.0166614	0.00833072	1.41589	0.157146	0.353984	-8.37393
1600002H07RIK	1.0734	1.57509	6.94132	7.30884e-12	3.94593e-11	14.1315
1600002K03RIK	0.660625	1.22095	4.899	1.13695e-06	4.87595e-06	2.48269
1600010M07RIK	-0.0197564	0.00987819	-1.32055	0.186977	0.4018	-8.50423
1600012H06RIK	1.72971	3.17175	9.06017	7.5978e-19	5.20689e-18	29.9855
1600014C10RIK	2.49562	1.94625	16.9253	3.50254e-56	6.94277e-55	115.517
1600014C23RIK	0.00663151	0.0133457	0.496493	0.619664	0.945055	-9.25286
1600015I10RIK	0	0	0	1	1	-9.37622
1600019K03RIK	0	0	0	1	1	-9.37622
1600020E01RIK	0.521919	2.22847	2.93976	0.00336644	0.0109937	-5.07085
1600023N17RIK	0.254242	0.22834	3.6737	0.000252802	0.000926809	-2.67021
1600027J07RIK	0	0	0	1	1	-9.37622
1600029I14RIK	0.00215983	0.00107991	1.00016	0.317497	0.549456	-8.87583
1600029O15RIK	0.137312	0.229778	1.99312	0.0465423	0.12537	-7.39222
1700001C02RIK	0	0	0	1	1	-9.37622
1700001C19RIK	-0.00215983	0.00107991	-1.00016	0.317497	0.549456	-8.87583
1700001D01RIK	0.0140639	0.0844126	0.408334	0.683123	1	-9.29278
1700001F09RIK	-0.00159172	0.00853876	-0.178552	0.858329	1	-9.36026
1700001G01RIK	-0.00647948	0.00323974	-1.73611	0.0828771	0.207863	-7.87011
1700001G11RIK	-0.325512	1.01352	-4.19388	3.0061e-05	0.000118259	-0.65573
1700001G17RIK	0.0432246	0.0910506	1.05771	0.290464	0.549456	-8.81662
1700001J03RIK	-0.0500815	0.0358399	-1.83292	0.0671352	0.173126	-7.69776
1700001J11RIK	0.00647948	0.00323974	1.73611	0.0828771	0.207863	-7.87011
1700001K19RIK	0.0349875	0.232623	0.576357	0.564514	0.879516	-9.20999
1700001K23RIK	-0.012097	0.0351395	-0.474428	0.635307	0.964081	-9.26358
1700001L05RIK	0.597619	0.498558	6.0914	1.64025e-09	8.07022e-09	8.83202
1700001L19RIK	2.48847	1.60154	18.3664	1.81587e-64	4.50248e-63	134.552
1700001O22RIK	0.517555	1.3794	3.37908	0.000757703	0.00266236	-3.69638
1700001P01RIK	0.106381	0.141822	2.21455	0.0270342	0.0766568	-6.92811
1700003C15RIK	0	0	0	1	1	-9.37622
1700003D09RIK	1.08359	0.824884	12.1592	1.16083e-31	1.15926e-30	59.2672
1700003E16RIK	1.63308	1.19581	13.2295	1.0245e-36	1.1835e-35	70.8457
1700003F12RIK	0.0466857	0.0911097	1.4384	0.15066	0.345538	-8.34184
1700003G13RIK	0	0	0	1	1	-9.37622
1700003G18RIK	0.0640413	0.0545419	2.84098	0.00459639	0.0147522	-5.3541
1700003H04RIK	0	0	0	1	1	-9.37622
1700003I22RIK	0	0	0	1	1	-9.37622
1700003L19RIK	-0.0195932	0.0273544	-0.983016	0.325857	0.561793	-8.89282
1700003M02RIK	0.0964981	0.197379	1.55427	0.120463	0.284595	-8.1687
1700003M07RIK	0.30941	0.300364	4.18393	3.13818e-05	0.000123213	-0.696656
1700003O11RIK	0.00401766	0.0803079	0.0970128	0.922737	1	-9.37151
1700003P14RIK	0	0	0	1	1	-9.37622
1700006A11RIK	0	0	0	1	1	-9.37622
1700006E09RIK	-8.06923e-05	0.0202128	-0.00507103	0.995955	1	-9.37621
1700006F04RIK	0.00273124	0.707112	0.0290091	0.976864	1	-9.3758
1700006H20RIK	0.0331379	0.0496385	0.960474	0.337068	0.578367	-8.91473
1700006H21RIK	0	0	0	1	1	-9.37622
1700007B14RIK	0.0212664	0.0923626	0.497043	0.619277	0.944538	-9.25259
1700007E05RIK	-0.0157828	0.017226	-1.0897	0.27613	0.549456	-8.78228
1700007F19RIK	0.1711	0.340877	2.63632	0.00852163	0.0263264	-5.91063
1700007G11RIK	0.0658452	0.0693017	1.78744	0.0741944	0.189055	-7.7799
1700007J10RIK	0.0660248	0.511414	1.11903	0.263417	0.532373	-8.7499
1700007K09RIK	0.0514724	0.0425708	2.12232	0.0340763	0.094507	-7.1273
1700007K13RIK	1.08727	0.702138	10.8593	6.13984e-26	5.21837e-25	46.1727
1700007L15RIK	0.131907	0.177265	2.3889	0.0170986	0.0503853	-6.52869
1700007P06RIK	0.104434	0.349182	1.3383	0.181128	0.391173	-8.48066
1700008C04RIK	0	0	0	1	1	-9.37622
1700008F21RIK	-0.0458352	0.231021	-0.80975	0.418292	0.692149	-9.04816
1700008J07RIK	0.478492	0.859251	4.70668	2.90282e-06	1.21647e-05	1.58062
1700008K24RIK	0.030629	0.0316804	1.08135	0.279822	0.549456	-8.79134
1700008O03RIK	0.497833	3.89589	4.16322	3.43114e-05	0.000134413	-0.781572
1700008P02RIK	0	0	0	1	1	-9.37622
1700009C05RIK	0	0	0	1	1	-9.37622
1700009J07RIK	0	0	0	1	1	-9.37622
1700009N14RIK	0	0	0	1	1	-9.37622
1700010B08RIK	0	0	0	1	1	-9.37622
1700010H22RIK	0.0150697	0.00753486	1.60669	0.108463	0.260062	-8.08598
1700010I02RIK	0	0	0	1	1	-9.37622
1700010I14RIK	0.00436475	0.0840212	0.108656	0.913499	1	-9.37031
1700010J16RIK	0.00342325	0.00171162	1.00017	0.317489	0.549456	-8.87581
1700010K23RIK	1.60565	2.92435	13.8951	5.28721e-40	6.68308e-39	78.3821
1700010L04RIK	3.18627e-05	0.129524	0.000623172	0.999503	1	-9.37622
1700010N08RIK	0.00863931	0.00431965	1.416	0.157112	0.353984	-8.37376
1700011A15RIK	0.0117439	0.00929517	0.993733	0.320613	0.554069	-8.88223
1700011B04RIK	0	0	0	1	1	-9.37622
1700011C11RIK	0	0	0	1	1	-9.37622
1700011E24RIK	0.0720844	0.038202	2.93193	0.00345172	0.0112594	-5.09366
1700011H14RIK	-0.00810857	0.124972	-0.150777	0.880185	1	-9.36484
1700011I03RIK	0.0825924	0.0883105	2.00293	0.0454764	0.12265	-7.37267
1700011L22RIK	0.00294292	0.00969469	0.212257	0.831953	1	-9.35367
1700012A03RIK	0.0110784	0.00553918	1.00018	0.317484	0.549456	-8.8758
1700012B07RIK	0.00501496	0.00250748	1.00018	0.317486	0.549456	-8.87581
1700012B09RIK	0	0	0	1	1	-9.37622
1700012C14RIK	0.0399947	0.0291721	1.8297	0.0676168	0.174154	-7.70365
1700012D01RIK	0.220561	0.13851	4.84898	1.45539e-06	6.20678e-06	2.2448
1700012D14RIK	-0.331076	0.682256	-3.4124	0.000671872	0.00237487	-3.5845
1700012D16RIK	-0.00359172	0.00953876	-0.321905	0.747597	1	-9.32436
1700012H19RIK	-0.00791137	0.00737893	-0.668296	0.504112	0.804827	-9.15274
1700012I11RIK	0	0	0	1	1	-9.37622
1700012J15RIK	0	0	0	1	1	-9.37622
1700012P22RIK	0	0	0	1	1	-9.37622
1700013D24RIK	-0.0170514	0.00852572	-1.41511	0.157373	0.354033	-8.37502
1700013F07RIK	0.274954	0.272416	4.14816	3.66037e-05	0.000143127	-0.843082
1700013G24RIK	0	0	0	1	1	-9.37622
1700013N06RIK	0	0	0	1	1	-9.37622
1700015C15RIK	0.0419264	0.0918807	1.37483	0.169517	0.371037	-8.43115
1700015E13RIK	0.0690511	0.0993571	1.78112	0.0752208	0.191328	-7.79114
1700015F17RIK	0.0364844	0.0529586	1.27484	0.202686	0.429126	-8.5635
1700015G11RIK	0	0	0	1	1	-9.37622
1700016B01RIK	0	0	0	1	1	-9.37622
1700016C15RIK	0.0102793	0.0266889	0.507141	0.612177	0.936108	-9.24751
1700016C19RIK	0.012959	0.00647948	1.73612	0.0828749	0.207863	-7.87009
1700016D06RIK	0.00627838	0.00529902	0.975251	0.329691	0.567542	-8.90043
1700016G14RIK	0.0502133	0.0399983	1.77231	0.076673	0.194592	-7.80676
1700016G22RIK	0.0117914	0.00589571	1.36777	0.171717	0.375012	-8.44082
1700016H13RIK	0.00684649	0.00342325	1.00018	0.317485	0.549456	-8.87581
1700016J18RIK	0.180347	0.298612	2.82114	0.00488776	0.0156265	-5.40982
1700016K19RIK	0.33969	0.191574	6.07746	1.78333e-09	8.7629e-09	8.7504
1700016L04RIK	0.0163971	0.0313246	0.783986	0.433249	0.712743	-9.06869
1700016L21RIK	0	0	0	1	1	-9.37622
1700016P04RIK	0	0	0	1	1	-9.37622
1700017B05RIK	0.765976	0.92505	6.00647	2.72325e-09	1.32697e-08	8.33737
1700017D01RIK	0.00215983	0.00107991	1.00016	0.317497	0.549456	-8.87583
1700017G19RIK	0.00558307	0.00279154	1.00018	0.317486	0.549456	-8.87581
1700017J07RIK	0.00822323	0.00411161	1.00018	0.317485	0.549456	-8.8758
1700017L05RIK	0	0	0	1	1	-9.37622
1700017M07RIK	0	0	0	1	1	-9.37622
1700017N19RIK	0	0	0	1	1	-9.37622
1700018A04RIK	0	0	0	1	1	-9.37622
1700018A23RIK	2.53164	2.70688	22.8819	3.5975e-92	2.02284e-90	198.253
1700018B08RIK	-0.0219439	0.0280495	-0.874191	0.382242	0.642803	-8.99389
1700018B24RIK	0	0	0	1	1	-9.37622
1700018C11RIK	-0.00386596	0.0358869	-0.139115	0.88939	1	-9.36653
1700018F24RIK	0	0	0	1	1	-9.37622
1700018L02RIK	0.890788	0.646269	11.8394	3.28416e-30	3.1588e-29	55.944
1700019A02RIK	-0.0586081	0.108957	-1.50487	0.1327	0.309243	-8.24415
1700019B03RIK	-0.0246357	0.0396651	-0.916258	0.359771	0.610712	-8.95622
1700019C18RIK	0.00684649	0.00342325	1.00018	0.317485	0.549456	-8.87581
1700019D03RIK	1.27686	3.42663	6.34706	3.4341e-10	1.73681e-09	10.3597
1700019E08RIK	0	0	0	1	1	-9.37622
1700019F05RIK	0	0	0	1	1	-9.37622
1700019G17RIK	0.262237	0.331949	3.17601	0.00154263	0.00523924	-4.35494
1700019G24RIK	-0.0855765	0.130479	-1.82258	0.0686904	0.176605	-7.71663
1700019J19RIK	-0.00658624	0.0177649	-0.35468	0.72291	1	-9.31326
1700019L03RIK	0.478955	0.47339	6.27538	5.35388e-10	2.68737e-09	9.92554
1700019L22RIK	-0.117613	0.215399	-1.86578	0.0623888	0.162291	-7.63717
1700019M22RIK	0	0	0	1	1	-9.37622
1700019N19RIK	0.00822323	0.00411161	1.00018	0.317485	0.549456	-8.8758
1700019O17RIK	0.00342325	0.00171162	1.00017	0.317489	0.549456	-8.87581
1700019P21RIK	0.00342325	0.00171162	1.00017	0.317489	0.549456	-8.87581
1700020A23RIK	0.00349639	0.0282144	0.155487	0.876471	1	-9.36412
1700020D05RIK	-0.0196806	0.0496024	-0.614689	0.538912	0.849728	-9.18715
1700020D12RIK	0	0	0	1	1	-9.37622
1700020G17RIK	0	0	0	1	1	-9.37622
1700020I14RIK	3.35179	4.79801	19.7313	1.34985e-72	4.263e-71	153.237
1700020L24RIK	0.0361482	0.0180741	2.3985	0.0166595	0.0491985	-6.50582
1700020M21RIK	0	0	0	1	1	-9.37622
1700020N01RIK	0.0121268	0.0060634	1.00018	0.317484	0.549456	-8.8758
1700020N18RIK	0.00431965	0.00215983	1.00018	0.317487	0.549456	-8.87581
1700021F02RIK	0	0	0	1	1	-9.37622
1700021F07RIK	0	0	0	1	1	-9.37622
1700021G15RIK	0	0	0	1	1	-9.37622
1700021K19RIK	1.28141	3.46865	7.1367	1.93173e-12	1.06656e-11	15.4382
1700021L23RIK	0.0263808	0.0131904	1.98326	0.0476338	0.127942	-7.41174
1700021N21RIK	0.198107	0.134381	4.48591	8.17403e-06	3.33075e-05	0.587575
1700022A21RIK	0	0	0	1	1	-9.37622
1700022A22RIK	0	0	0	1	1	-9.37622
1700022E09RIK	0	0	0	1	1	-9.37622
1700022H01RIK	0.00837982	0.117096	0.186824	0.85184	1	-9.35875
1700022H16RIK	0	0	0	1	1	-9.37622
1700022I11RIK	0.0381888	0.0241094	1.6501	0.0992614	0.241375	-8.01542
1700022N22RIK	0.0459746	0.0976524	1.09675	0.273035	0.548879	-8.77457
1700023C21RIK	0.00215983	0.00107991	1.00016	0.317497	0.549456	-8.87583
1700023E05RIK	0.0848307	0.0669717	2.49835	0.01265	0.0380804	-6.26269
1700023F02RIK	0.0311581	0.025609	1.60495	0.108846	0.260802	-8.08877
1700023F06RIK	0.359322	0.487857	4.30932	1.81305e-05	7.24442e-05	-0.173845
1700023G09RIK	0	0	0	1	1	-9.37622
1700023L04RIK	0.012959	0.00647948	1.60659	0.108485	0.260072	-8.08615
1700024B05RIK	0	0	0	1	1	-9.37622
1700024B18RIK	-0.0103319	0.124494	-0.278921	0.780368	1	-9.33728
1700024F13RIK	-0.0274231	0.172449	-0.545788	0.585343	0.904569	-9.22715
1700024G13RIK	0	0	0	1	1	-9.37622
1700024I08RIK	0	0	0	1	1	-9.37622
1700024N05RIK	0	0	0	1	1	-9.37622
1700024P04RIK	0	0	0	1	1	-9.37622
1700024P16RIK	0.0916876	0.207355	1.57905	0.114668	0.272898	-8.12995
1700025B11RIK	0	0	0	1	1	-9.37622
1700025C18RIK	0	0	0	1	1	-9.37622
1700025D23RIK	0	0	0	1	1	-9.37622
1700025F22RIK	0	0	0	1	1	-9.37622
1700025F24RIK	0.0421071	0.0292768	2.22588	0.0262626	0.0746555	-6.90306
1700025G04RIK	2.93861	4.17685	17.836	2.22235e-61	5.10085e-60	127.457
1700025J12RIK	-0.00521606	0.0081911	-0.429137	0.667923	1	-9.28406
1700025K24RIK	0	0	0	1	1	-9.37622
1700025M24RIK	0	0	0	1	1	-9.37622
1700025N23RIK	-0.0180222	0.00901112	-1.29397	0.196	0.417389	-8.53896
1700026D08RIK	0.00799231	0.00399616	1.00018	0.317485	0.549456	-8.8758
1700026D11RIK	0	0	0	1	1	-9.37622
1700026F02RIK	0.00431965	0.00215983	1.00018	0.317487	0.549456	-8.87581
1700026J12RIK	0.0110784	0.00553918	1.40968	0.158972	0.35578	-8.38269
1700026J14RIK	0.223459	0.329023	2.89759	0.00384927	0.0124783	-5.19294
1700026L06RIK	0.035891	0.0179455	2.21641	0.0269061	0.0763296	-6.924
1700027A15RIK	0.00342325	0.00171162	1.00017	0.317489	0.549456	-8.87581
1700027F06RIK	0	0	0	1	1	-9.37622
1700027F09RIK	0	0	0	1	1	-9.37622
1700027H10RIK	0.340845	0.802436	3.56109	0.000388152	0.00140041	-3.07226
1700027I24RIK	0.00215983	0.00107991	1.00016	0.317497	0.549456	-8.87583
1700027J07RIK	0	0	0	1	1	-9.37622
1700028B04RIK	0.0837522	0.0418761	4.74921	2.36611e-06	9.96829e-06	1.77714
1700028D13RIK	0.00501496	0.00250748	1.00018	0.317486	0.549456	-8.87581
1700028E10RIK	-0.0243704	0.110466	-0.54025	0.589154	0.908712	-9.23016
1700028I16RIK	0	0	0	1	1	-9.37622
1700028J19RIK	0.289383	0.270643	3.99277	7.04865e-05	0.000270107	-1.46509
1700028K03RIK	0.693678	2.44454	4.16671	3.3801e-05	0.000132488	-0.767316
1700028M03RIK	0	0	0	1	1	-9.37622
1700028P14RIK	0.210111	0.187579	3.76362	0.000178032	0.000661172	-2.34041
1700028P15RIK	0	0	0	1	1	-9.37622
1700029B22RIK	0	0	0	1	1	-9.37622
1700029F12RIK	-0.00215983	0.00107991	-1.00016	0.317497	0.549456	-8.87583
1700029H14RIK	0.00337493	0.0168546	0.270415	0.786901	1	-9.33962
1700029I15RIK	-0.0782472	0.399612	-0.951704	0.341496	0.584836	-8.92311
1700029J03RIK	0	0	0	1	1	-9.37622
1700029J07RIK	0.249987	1.20686	1.58457	0.113407	0.270296	-8.12123
1700029M03RIK	0	0	0	1	1	-9.37622
1700029M20RIK	0	0	0	1	1	-9.37622
1700029N11RIK	0	0	0	1	1	-9.37622
1700029P11RIK	0	0	0	1	1	-9.37622
1700030A11RIK	0.000568109	0.00745885	0.0667599	0.946787	1	-9.37399
1700030C10RIK	-0.039335	0.122943	-0.743585	0.457316	0.743571	-9.09956
1700030C14RIK	0.00939526	0.0207551	0.472399	0.636753	0.965962	-9.26454
1700030E10RIK	0.00215983	0.00107991	1.00016	0.317497	0.549456	-8.87583
1700030F04RIK	0.0262849	0.0131425	2.49737	0.0126847	0.0381795	-6.26512
1700030F18RIK	0.00977011	0.00488506	1.00018	0.317485	0.549456	-8.8758
1700030J22RIK	1.13003	0.807446	10.7188	2.38733e-25	1.99156e-24	44.8248
1700030K09RIK	1.07401	2.18211	7.38636	3.36913e-13	1.91209e-12	17.1549
1700030L20RIK	0	0	0	1	1	-9.37622
1700030L22RIK	-0.0392729	0.135812	-0.658499	0.510382	0.81286	-9.15924
1700030M09RIK	0	0	0	1	1	-9.37622
1700030N03RIK	0	0	0	1	1	-9.37622
1700030O20RIK	0	0	0	1	1	-9.37622
1700031A10RIK	0.00209688	0.0110784	0.159006	0.873699	1	-9.36357
1700031L13RIK	0	0	0	1	1	-9.37622
1700031M16RIK	0	0	0	1	1	-9.37622
1700031P21RIK	0.0167492	0.00837461	1.70705	0.0881494	0.218632	-7.92004
1700034B16RIK	0	0	0	1	1	-9.37622
1700034E13RIK	0	0	0	1	1	-9.37622
1700034G24RIK	0.14483	0.269481	2.2228	0.0264704	0.0752004	-6.90989
1700034H15RIK	0.268497	0.480772	2.89804	0.00384378	0.0124614	-5.19164
1700034I23RIK	-0.078339	0.347017	-0.994854	0.320067	0.553298	-8.88112
1700034J05RIK	-0.0187493	0.0649911	-0.457218	0.647622	0.978879	-9.2716
1700034K08RIK	0	0	0	1	1	-9.37622
1700034O15RIK	0.00215983	0.00107991	1.00016	0.317497	0.549456	-8.87583
1700034P13RIK	0.722965	0.78571	7.50447	1.44854e-13	8.33353e-13	17.9854
1700036G14RIK	-0.0147851	0.00739254	-1.00018	0.317484	0.549456	-8.8758
1700037C18RIK	1.0852	0.87906	9.54045	1.22135e-20	8.83267e-20	34.074
1700037H04RIK	3.91929	3.3904	24.1474	2.85982e-100	2.01208e-98	216.888
1700039E15RIK	0.0299506	0.0311908	1.08815	0.276812	0.549456	-8.78396
1700039E22RIK	0	0	0	1	1	-9.37622
1700039I01RIK	0	0	0	1	1	-9.37622
1700039M10RIK	0.0389425	0.174788	0.701787	0.482989	0.777636	-9.12978
1700040D17RIK	0.416657	0.432653	4.77712	2.06722e-06	8.73799e-06	1.90702
1700040L02RIK	0.396007	0.274463	5.45938	6.14031e-08	2.81011e-07	5.30581
1700041A01RIK	0	0	0	1	1	-9.37622
1700041B01RIK	0.0444129	0.220146	0.952347	0.34117	0.584428	-8.9225
1700041C23RIK	0.00431965	0.00215983	1.00018	0.317487	0.549456	-8.87581
1700041M19RIK	0	0	0	1	1	-9.37622
1700042G07RIK	0.0077429	0.00387145	1.69138	0.0911007	0.224547	-7.9466
1700042G15RIK	0	0	0	1	1	-9.37622
1700042O10RIK	0	0	0	1	1	-9.37622
1700044C05RIK	0	0	0	1	1	-9.37622
1700044K03RIK	0	0	0	1	1	-9.37622
1700045H11RIK	0.0077429	0.00387145	1.40656	0.159893	0.356721	-8.38707
1700046C09RIK	0	0	0	1	1	-9.37622
1700047A11RIK	-0.0876813	1.54542	-0.943491	0.345676	0.590461	-8.9309
1700047E10RIK	-9.36751e-17	0.00215983	-3.06735e-14	1	1	-9.37622
1700047G03RIK	0.0113346	0.0112504	0.972097	0.331256	0.569769	-8.9035
1700047I17RIK2	0.112678	0.0955829	5.66443	1.96945e-08	9.2088e-08	6.41044
1700047L14RIK	0	0	0	1	1	-9.37622
1700047M11RIK	-0.0752416	0.0410441	-2.33288	0.0198684	0.0578291	-6.6603
1700048B10RIK	0	0	0	1	1	-9.37622
1700048F04RIK	0.147678	0.0738391	4.14274	3.74643e-05	0.000146355	-0.865179
1700048M11RIK	-0.0281996	0.123155	-0.669797	0.503155	0.803819	-9.15173
1700048O14RIK	0	0	0	1	1	-9.37622
1700048O20RIK	0.744788	1.23409	4.8475	1.46602e-06	6.25021e-06	2.23779
1700049E15RIK	0	0	0	1	1	-9.37622
1700049E17RIK1	0	0	0	1	1	-9.37622
1700049E17RIK2	0	0	0	1	1	-9.37622
1700049E22RIK	0	0	0	1	1	-9.37622
1700049G17RIK	0.604625	1.4699	3.83853	0.000132195	0.000496966	-2.05977
1700049J03RIK	0.0880174	0.0744452	2.52961	0.0115842	0.0350557	-6.18457
1700049L16RIK	0	0	0	1	1	-9.37622
1700051A21RIK	0.0628735	0.129757	1.39007	0.164844	0.364686	-8.41011
1700052H01RIK	-0.000159828	0.0092547	-0.0122135	0.990258	1	-9.37615
1700052I22RIK	0	0	0	1	1	-9.37622
1700052K11RIK	0.848947	0.743319	7.84109	1.22772e-14	7.33542e-14	20.416
1700052N19RIK	2.10415	1.63335	14.4466	8.34059e-43	1.14375e-41	84.8088
1700054A03RIK	0.0403062	0.0201531	3.09902	0.00200037	0.00670991	-4.59421
1700054K19RIK	0	0	0	1	1	-9.37622
1700054M17RIK	-0.0246375	0.0638692	-0.764406	0.44482	0.727937	-9.08386
1700054O19RIK	0.0138063	0.0103264	1.20322	0.229199	0.474806	-8.65219
1700055C04RIK	0	0	0	1	1	-9.37622
1700055D18RIK	0.069824	0.206196	0.984141	0.325304	0.560945	-8.89172
1700055N04RIK	0.00215983	0.00107991	1.00016	0.317497	0.549456	-8.87583
1700056E22RIK	0.0227248	0.0135222	2.04681	0.0409589	0.111721	-7.28412
1700057G04RIK	0	0	0	1	1	-9.37622
1700057H15RIK	-0.00342325	0.00171162	-1.00017	0.317489	0.549456	-8.87581
1700057H21RIK	0.00215983	0.00107991	1.00016	0.317497	0.549456	-8.87583
1700058M13RIK	-0.027343	0.0792754	-0.637646	0.523862	0.830457	-9.17276
1700060C16RIK	0	0	0	1	1	-9.37622
1700060C20RIK	0.00431965	0.00215983	1.00018	0.317487	0.549456	-8.87581
1700060L04RIK	0	0	0	1	1	-9.37622
1700060O08RIK	0.0264121	0.0166293	2.40067	0.016562	0.0489312	-6.50066
1700061F12RIK	0	0	0	1	1	-9.37622
1700061G19RIK	0.011526	0.0746483	0.323461	0.74642	1	-9.32386
1700061I17RIK	0	0	0	1	1	-9.37622
1700061J23RIK	0.010598	0.00529902	1.00018	0.317484	0.549456	-8.8758
1700062C10RIK	0	0	0	1	1	-9.37622
1700063A18RIK	0	0	0	1	1	-9.37622
1700063D05RIK	0	0	0	1	1	-9.37622
1700063H04RIK	0	0	0	1	1	-9.37622
1700063O14RIK	-0.000480329	0.015726	-0.0364851	0.970903	1	-9.37555
1700064F23RIK	-0.012598	0.00629902	-1.00018	0.317484	0.549456	-8.8758
1700064J06RIK	0	0	0	1	1	-9.37622
1700064M15RIK	0.0386486	0.0312542	1.84285	0.065671	0.169757	-7.67957
1700065D16RIK	-0.163334	0.413029	-2.44326	0.0147414	0.0438981	-6.39805
1700065I16RIK	0	0	0	1	1	-9.37622
1700065J11RIK	0	0	0	1	1	-9.37622
1700065J18RIK	0.0231774	0.036383	0.915588	0.360122	0.611159	-8.95684
1700065L07RIK	0.0077429	0.00387145	1.40656	0.159893	0.356721	-8.38707
1700065O20RIK	0	0	0	1	1	-9.37622
1700066B17RIK	0	0	0	1	1	-9.37622
1700066B19RIK	-0.0392784	0.0196392	-1.73584	0.0829252	0.207959	-7.87058
1700066C05RIK	0	0	0	1	1	-9.37622
1700066J03RIK	0.0222445	0.0154419	1.84423	0.0654701	0.169302	-7.67704
1700066N21RIK	0	0	0	1	1	-9.37622
1700066O22RIK	0.00990273	0.00495136	1.35277	0.176459	0.383574	-8.4612
1700067G17RIK	-0.00108531	0.00828556	-0.0924417	0.926367	1	-9.37194
1700067K01RIK	0.288085	0.418127	3.80979	0.000148277	0.000554692	-2.16807
1700067P10RIK	0.00717479	0.0035874	1.00018	0.317485	0.549456	-8.87581
1700069L16RIK	0.0190432	0.00952158	1.38416	0.166645	0.367818	-8.4183
1700069P05RIK	0	0	0	1	1	-9.37622
1700071G01RIK	-0.0135486	0.0145172	-0.871139	0.383904	0.645134	-8.99655
1700071M16RIK	0.0596799	0.234264	0.979939	0.327372	0.563992	-8.89584
1700072B07RIK	0	0	0	1	1	-9.37622
1700072I22RIK	0.00215983	0.00107991	1.00016	0.317497	0.549456	-8.87583
1700072O05RIK	0	0	0	1	1	-9.37622
1700073E17RIK	0.00990273	0.00495136	1.55873	0.119402	0.282293	-8.16176
1700074H08RIK	-0.0312046	0.103145	-0.705925	0.480412	0.77426	-9.12687
1700074P13RIK	0	0	0	1	1	-9.37622
1700080E11RIK	0	0	0	1	1	-9.37622
1700080G11RIK	0.0653564	0.050748	2.00625	0.045121	0.121832	-7.36605
1700080G18RIK	0.30345	0.471481	3.75729	0.000182528	0.000677332	-2.3639
1700080N15RIK	0.0217851	0.660047	0.265333	0.790812	1	-9.34099
1700081B01RIK	0.00134231	0.0129831	0.0892766	0.928881	1	-9.37223
1700081H04RIK	0	0	0	1	1	-9.37622
1700083H02RIK	0	0	0	1	1	-9.37622
1700084C01RIK	0.17102	0.124049	3.85487	0.000123801	0.000466411	-1.99785
1700084D21RIK	0	0	0	1	1	-9.37622
1700084E18RIK	0.0474146	0.0778721	1.35858	0.174611	0.380148	-8.45334
1700084F23RIK	0	0	0	1	1	-9.37622
1700084J12RIK	0.00431965	0.00215983	1.41599	0.157117	0.353984	-8.37379
1700085C21RIK	0.0246207	0.0791354	0.658172	0.510592	0.813133	-9.15946
1700086D15RIK	0.0345426	0.117449	0.703455	0.481949	0.776261	-9.12861
1700086L19RIK	3.19716	2.59098	20.5148	2.28039e-77	8.2288e-76	164.209
1700086O06RIK	0.70165	1.46407	5.21467	2.27273e-07	1.00953e-06	4.03757
1700086P04RIK	0.0257532	0.117549	0.493038	0.622103	0.948223	-9.25457
1700087I21RIK	0.0278887	0.121342	0.613871	0.539452	0.850356	-9.18765
1700087M22RIK	0.221154	0.273167	4.55484	5.94421e-06	2.44539e-05	0.892725
1700088E04RIK	1.09244	1.24593	8.95739	1.79789e-18	1.22018e-17	29.1335
1700091H14RIK	0	0	0	1	1	-9.37622
1700092C02RIK	0	0	0	1	1	-9.37622
1700092C10RIK	0	0	0	1	1	-9.37622
1700092E19RIK	0	0	0	1	1	-9.37622
1700092K14RIK	0.0473025	0.0576396	1.55399	0.120528	0.284732	-8.16913
1700092M07RIK	0.0127756	0.0174662	0.806923	0.419918	0.69443	-9.05044
1700093K21RIK	-0.0633552	0.0668811	-1.60397	0.109062	0.261264	-8.09035
1700094D03RIK	-0.131041	1.46854	-0.800907	0.423391	0.699127	-9.05528
1700094J05RIK	0.177469	0.204622	3.96064	8.04949e-05	0.000307087	-1.59084
1700094M23RIK	0.0086205	0.0929532	0.206267	0.836627	1	-9.35493
1700094M24RIK	0	0	0	1	1	-9.37622
1700095A13RIK	0	0	0	1	1	-9.37622
1700095A21RIK	0	0	0	1	1	-9.37622
1700095B10RIK	0	0	0	1	1	-9.37622
1700095J12RIK	-0.0161927	0.0857596	-0.40777	0.683537	1	-9.29301
1700096J18RIK	0.0161111	0.00805554	1.38955	0.165002	0.365013	-8.41083
1700096K18RIK	0.52027	0.517219	5.53356	4.08696e-08	1.88621e-07	5.70099
1700096P03RIK	0	0	0	1	1	-9.37622
1700097N02RIK	0	0	0	1	1	-9.37622
1700099I09RIK	0.00235171	0.171378	0.0487943	0.961094	1	-9.37503
1700100I10RIK	0	0	0	1	1	-9.37622
1700100L14RIK	-0.0100255	0.0437747	-0.343294	0.731455	1	-9.31724
1700101E01RIK	-0.0111661	0.00558307	-1.00018	0.317484	0.549456	-8.8758
1700101G07RIK	-0.00215983	0.00107991	-1.00016	0.317497	0.549456	-8.87583
1700101I11RIK	2.28096	2.28564	23.2923	8.73479e-95	5.30184e-93	204.269
1700101O22RIK	-0.00215983	0.00107991	-1.00016	0.317497	0.549456	-8.87583
1700102H20RIK	0.0285416	0.159142	0.533788	0.593617	0.914058	-9.23363
1700102J08RIK	0	0	0	1	1	-9.37622
1700102P08RIK	0.212121	0.469574	2.27412	0.0231873	0.0667309	-6.79501
1700104L18RIK	0	0	0	1	1	-9.37622
1700105P06RIK	0.0486381	0.208954	0.793826	0.427501	0.704938	-9.06093
1700106J16RIK	0	0	0	1	1	-9.37622
1700108F19RIK	0.013369	0.00668448	1.00018	0.317484	0.549456	-8.8758
1700108J01RIK	0	0	0	1	1	-9.37622
1700108N06RIK	0	0	0	1	1	-9.37622
1700109G14RIK	-0.00519653	0.0131963	-0.304761	0.760617	1	-9.32974
1700109G15RIK	0	0	0	1	1	-9.37622
1700109H08RIK	0.320636	1.57837	2.48161	0.0132558	0.0397982	-6.30414
1700109I08RIK	0	0	0	1	1	-9.37622
1700109K24RIK	0.172284	0.842992	1.4937	0.135595	0.315235	-8.26087
1700110C19RIK	-0.0616379	0.111254	-1.31003	0.190509	0.40764	-8.51805
1700110I01RIK	-0.00126342	0.00279154	-0.312191	0.754966	1	-9.32744
1700110I07RIK	0.00215983	0.00107991	1.00016	0.317497	0.549456	-8.87583
1700110K17RIK	0.272243	0.732708	3.17378	0.00155443	0.00527518	-4.36197
1700112D23RIK	0.553828	0.381017	7.54429	1.08697e-13	6.28612e-13	18.2681
1700112E06RIK	0.0537727	0.0446383	1.70342	0.0888253	0.220096	-7.9262
1700112H04RIK	-0.0167467	0.050391	-0.465677	0.641557	0.971438	-9.2677
1700112H15RIK	0	0	0	1	1	-9.37622
1700112J05RIK	0.0193894	0.00969469	1.92402	0.0546585	0.144382	-7.52712
1700112J16RIK	0.293963	0.167732	5.69515	1.65574e-08	7.77574e-08	6.57918
1700112K13RIK	0	0	0	1	1	-9.37622
1700112N08RIK	0.00933462	0.00466731	1.24678	0.212795	0.446768	-8.59886
1700113A16RIK	2.37496	3.87665	14.958	1.83166e-45	2.68723e-44	90.9081
1700113B09RIK	-0.0134113	0.00670567	-1.00018	0.317484	0.549456	-8.8758
1700113H08RIK	0.00172023	0.0326955	0.0839698	0.933099	1	-9.37269
1700116B05RIK	0	0	0	1	1	-9.37622
1700116H05RIK	0	0	0	1	1	-9.37622
1700119H24RIK	0.00684649	0.00342325	1.00018	0.317485	0.549456	-8.87581
1700120C14RIK	0.479992	0.754162	6.78206	2.11163e-11	1.11989e-10	13.0907
1700120E14RIK	-0.0221745	0.0110872	-1.59307	0.111486	0.266354	-8.10774
1700120G07RIK	0	0	0	1	1	-9.37622
1700120K04RIK	0.010595	0.0445444	0.469115	0.639098	0.968469	-9.26609
1700121N20RIK	0.00747177	0.00373589	1.00018	0.317485	0.549456	-8.8758
1700122C19RIK	0	0	0	1	1	-9.37622
1700122E12RIK	0.0425551	0.0463233	1.77085	0.0769156	0.195172	-7.80934
1700122H20RIK	-0.00501496	0.00682714	-0.68882	0.49111	0.788237	-9.1388
1700122O11RIK	0	0	0	1	1	-9.37622
1700123I01RIK	0.0416409	0.0208205	2.4074	0.0162615	0.0481041	-6.48455
1700123J17RIK	0.00342325	0.00171162	1.00017	0.317489	0.549456	-8.87581
1700123K08RIK	0.0110155	0.0556584	0.297112	0.766448	1	-9.33204
1700123L14RIK	0.0413757	0.204951	0.769248	0.441943	0.724265	-9.08014
1700123M08RIK	0.159844	0.284758	2.38468	0.0172949	0.0509211	-6.53873
1700123O12RIK	0	0	0	1	1	-9.37622
1700123O20RIK	2.24436	3.78773	15.0901	3.69312e-46	5.52232e-45	92.504
1700123O21RIK	-0.177295	0.216364	-3.35857	0.000815494	0.00285705	-3.76471
1700124L16RIK	0.276487	0.475369	3.40885	0.000680561	0.00240397	-3.59646
1700124M09RIK	0	0	0	1	1	-9.37622
1700125G02RIK	-0.0820086	0.182841	-1.9226	0.054837	0.144745	-7.52984
1700125G22RIK	0.0479087	0.0239543	2.36697	0.0181397	0.0532032	-6.58059
1700125H03RIK	0.0399602	0.0274519	2.10848	0.035258	0.0974432	-7.15646
1700125H20RIK	-0.0285845	0.100777	-0.911013	0.362526	0.614443	-8.96102
1700126H18RIK	0	0	0	1	1	-9.37622
1700128A07RIK	0	0	0	1	1	-9.37622
1700128E19RIK	0.00431965	0.00215983	1.00018	0.317487	0.549456	-8.87581
1700128F08RIK	-1.8735e-16	0.00431965	-3.54318e-14	1	1	-9.37622
1700129C05RIK	0	0	0	1	1	-9.37622
1810006J02RIK	0	0	0	1	1	-9.37622
1810007C17RIK	0.0196534	0.0227366	1.21844	0.223369	0.465145	-8.63377
1810007D17RIK	-0.0128348	0.00857723	-1.04777	0.29502	0.549456	-8.82708
1810008I18RIK	0	0	0	1	1	-9.37622
1810009A15RIK	2.87922	3.07151	17.8885	1.10423e-61	2.54781e-60	128.155
1810009J06RIK	0	0	0	1	1	-9.37622
1810010D01RIK	-0.0281787	0.116797	-0.584974	0.558708	0.87467	-9.20498
1810010H24RIK	0.354621	0.463808	3.81481	0.000145344	0.000544011	-2.14923
1810010K12RIK	0	0	0	1	1	-9.37622
1810011H11RIK	-0.0642486	0.0321243	-2.00585	0.0451629	0.121929	-7.36683
1810011O10RIK	0.0494658	0.0297479	2.12171	0.0341273	0.0946171	-7.12858
1810012K08RIK	0.0721955	0.101716	1.87616	0.0609489	0.158989	-7.61781
1810012K16RIK	0.0438594	0.124996	0.903049	0.366735	0.620378	-8.96824
1810013A23RIK	-0.0118615	0.00593073	-1.00018	0.317484	0.549456	-8.8758
1810013D15RIK	0.00647948	0.0075594	0.906303	0.365011	0.617686	-8.96529
1810013L24RIK	2.34327	2.77555	14.2951	4.98755e-42	6.68023e-41	83.0271
1810014B01RIK	0.486481	0.57453	4.62511	4.27711e-06	1.77451e-05	1.20841
1810018F18RIK	0	0	0	1	1	-9.37622
1810019D21RIK	0.0313386	0.0421073	1.12195	0.262174	0.530422	-8.74662
1810019N24RIK	0.053602	0.053709	1.73438	0.0831842	0.208472	-7.87311
1810020O05RIK	0.022835	0.0740611	0.542938	0.587304	0.906512	-9.2287
1810021B22RIK	0.181184	0.204889	3.49389	0.000498631	0.00178247	-3.30643
1810022K09RIK	1.85629	5.52855	14.5463	2.55548e-43	3.5613e-42	85.9873
1810024B03RIK	0.0991758	0.207221	1.95423	0.0509755	0.135746	-7.46872
1810026B05RIK	0.25923	4.84883	1.56376	0.118215	0.279946	-8.15392
1810026J23RIK	2.33747	3.05012	12.6315	7.4294e-34	7.91019e-33	64.2914
1810032O08RIK	0.271291	0.88378	2.09185	0.036724	0.101122	-7.19125
1810034E14RIK	0.0320265	0.023485	1.65122	0.0990335	0.240875	-8.01359
1810035K13RIK	0	0	0	1	1	-9.37622
1810037I17RIK	3.4513	4.91844	22.367	6.57876e-89	3.31726e-87	190.749
1810041H14RIK	0.119003	0.264398	1.86194	0.062929	0.163443	-7.64431
1810041L15RIK	0.698088	1.25541	4.52748	6.74864e-06	2.76549e-05	0.771094
1810043G02RIK	2.27836	3.03487	12.4397	5.87268e-33	6.09665e-32	62.2348
1810044D09RIK	0.196951	0.182138	3.56631	0.000380617	0.00137428	-3.05391
1810046K07RIK	0.000249411	0.0078676	0.0224172	0.98212	1	-9.37597
1810049I09RIK	0	0	0	1	1	-9.37622
1810053B23RIK	0	0	0	1	1	-9.37622
1810055G02RIK	2.71486	2.83873	15.1848	1.16386e-46	1.76292e-45	93.6549
1810058I24RIK	2.77114	2.11563	20.2562	8.72515e-76	2.99169e-74	160.57
1810062G17RIK	-0.0156294	0.0443477	-0.568681	0.569711	0.885738	-9.21439
1810062O18RIK	0.506171	0.579	5.5917	2.96033e-08	1.37517e-07	6.01428
1810063I02RIK	0	0	0	1	1	-9.37622
1810064F22RIK	0.000529401	0.0389792	0.0381631	0.969566	1	-9.37549
1810065E05RIK	0	0	0	1	1	-9.37622
1810073O08RIK	0	0	0	1	1	-9.37622
2010001A14RIK	0.389568	0.37722	5.21588	2.25843e-07	1.00329e-06	4.04368
2010001E11RIK	-9.36751e-17	0.00215983	-3.06735e-14	1	1	-9.37622
2010001M07RIK	-0.00761029	0.0141882	-0.399496	0.68962	1	-9.29635
2010002M12RIK	0.317884	0.28854	3.99228	7.06279e-05	0.000270624	-1.46699
2010003K11RIK	0	0	0	1	1	-9.37622
2010005H15RIK	0	0	0	1	1	-9.37622
2010009K17RIK	0.0352151	0.0410251	1.53378	0.125425	0.294495	-8.20028
2010010A06RIK	-0.0170678	0.0150134	-0.980356	0.327167	0.563728	-8.89544
2010012O05RIK	3.75398	3.85403	24.673	1.15508e-103	8.9846e-102	224.697
2010016I18RIK	-0.00215983	0.00107991	-1.00016	0.317497	0.549456	-8.87583
2010106C02RIK	0.00543812	0.0216853	0.341577	0.732747	1	-9.31783
2010107G12RIK	0.0674453	0.0798859	1.64184	0.100963	0.244876	-8.029
2010107G23RIK	2.85355	3.42503	17.3791	9.36455e-59	1.97857e-57	121.427
2010109A12RIK	0.00328857	0.0595474	0.107672	0.914279	1	-9.37042
2010109I03RIK	0.000957618	0.261235	0.0121989	0.99027	1	-9.37615
2010110K18RIK	0.0334046	0.0258771	1.67678	0.093924	0.230532	-7.97114
2010111I01RIK	-1.23073	6.41307	-6.68481	3.9943e-11	2.09926e-10	12.4659
2010203P06RIK	0	0	0	1	1	-9.37622
2010300C02RIK	2.20636	4.34523	12.414	7.73559e-33	8.00488e-32	61.9608
2010300F17RIK	0.0239812	0.0119906	1.84207	0.0657849	0.170041	-7.681
2010310C07RIK	0.00917479	0.00458739	1.00018	0.317485	0.549456	-8.8758
2010315B03RIK	1.10741	2.37586	6.22979	7.08486e-10	3.53637e-09	9.65179
2010320M18RIK	1.5513	1.10746	13.7565	2.60951e-39	3.23611e-38	76.7923
2010320O07RIK	0.104268	0.205426	1.62145	0.105263	0.253402	-8.06222
2200002D01RIK	0.0103049	0.0470504	0.491811	0.62297	0.949234	-9.25517
2200002J24RIK	0.111252	0.0729047	6.1827	9.44493e-10	4.69263e-09	9.37092
2210008F06RIK	0.369448	0.39176	5.23303	2.06396e-07	9.19913e-07	4.13082
2210010C04RIK	0.0266615	0.0133308	1.96398	0.0498316	0.133147	-7.44968
2210011C24RIK	0.161092	0.0839692	4.8365	1.54735e-06	6.5856e-06	2.1858
2210011K15RIK	0	0	0	1	1	-9.37622
2210015D19RIK	1.42175	3.20777	8.16407	1.0555e-15	6.54279e-15	22.8356
2210016F16RIK	1.73066	1.16724	13.3631	2.28706e-37	2.68633e-36	72.3384
2210016L21RIK	3.20811	5.77696	19.1501	4.19086e-69	1.20485e-67	145.209
2210018M11RIK	1.07159	5.94914	6.49008	1.39732e-10	7.1917e-10	11.2394
2210019I11RIK	0	0	0	1	1	-9.37622
2210039B01RIK	-0.00342325	0.00171162	-1.00017	0.317489	0.549456	-8.87581
2210404E10RIK	0	0	0	1	1	-9.37622
2210404O09RIK	1.02483	1.6244	6.21655	7.68263e-10	3.8311e-09	9.57265
2210406O10RIK	0.469704	0.623641	5.06762	4.86455e-07	2.12463e-06	3.30181
2210407C18RIK	0.00747177	0.00373589	1.00018	0.317485	0.549456	-8.8758
2210408F21RIK	1.00888	4.62471	5.8282	7.73464e-09	3.68844e-08	7.31998
2210408I21RIK	1.8968	2.88755	10.3795	5.99142e-24	4.78816e-23	41.627
2210409D07RIK	-0.0124296	0.00621478	-1.00018	0.317484	0.549456	-8.8758
2210409E12RIK	-0.00215983	0.00107991	-1.00016	0.317497	0.549456	-8.87583
2210414B05RIK	0	0	0	1	1	-9.37622
2210416O15RIK	-0.00194137	0.0349985	-0.0903608	0.92802	1	-9.37213
2210417A02RIK	0	0	0	1	1	-9.37622
2210420H20RIK	-0.00404853	0.00760734	-0.423102	0.67232	1	-9.28663
2300002M23RIK	0	0	0	1	1	-9.37622
2300003K06RIK	0	0	0	1	1	-9.37622
2300005B03RIK	0.0157352	0.0078676	1.57861	0.114768	0.273067	-8.13064
2310001H17RIK	0.125473	0.0774945	3.43779	0.000612647	0.00217395	-3.49854
2310001K24RIK	0.0282288	0.112711	0.818571	0.413242	0.68536	-9.04097
2310002D06RIK	-0.0134232	0.182681	-0.272611	0.785213	1	-9.33903
2310002F09RIK	0.0372713	0.0951659	0.759137	0.447964	0.732077	-9.08787
2310002L09RIK	0	0	0	1	1	-9.37622
2310003H01RIK	-0.0823763	1.76004	-0.469926	0.638519	0.967976	-9.26571
2310003N18RIK	-0.00264016	0.0103264	-0.197676	0.843342	1	-9.35666
2310005A03RIK	0.00558307	0.00279154	1.38093	0.167635	0.367916	-8.42276
2310005E17RIK	0	0	0	1	1	-9.37622
2310007B03RIK	0	0	0	1	1	-9.37622
2310007L24RIK	0	0	0	1	1	-9.37622
2310008N11RIK	0.0114944	0.00574722	1.37407	0.169753	0.37142	-8.4322
2310009A05RIK	3.48995	2.26057	28.2994	2.15824e-127	3.26088e-125	279.308
2310009B15RIK	2.49225	1.94676	20.5468	1.44921e-77	5.26113e-76	164.662
2310010J17RIK	0.270532	0.228427	5.99248	2.95869e-09	1.43836e-08	8.2565
2310011J03RIK	3.31551	2.62004	22.7772	1.66282e-91	9.05879e-90	196.724
2310014F06RIK	0.00647948	0.00323974	1.00018	0.317485	0.549456	-8.87581
2310014L17RIK	0.0102611	0.105996	0.210372	0.833424	1	-9.35407
2310015A10RIK	0.382664	0.613504	3.55301	0.000400106	0.00144106	-3.10065
2310015A16RIK	0	0	0	1	1	-9.37622
2310015B20RIK	0.0221745	0.0110872	1.83534	0.0667765	0.172318	-7.69335
2310015D24RIK	0.0529905	0.0395501	1.92607	0.0544024	0.143805	-7.52319
2310015K22RIK	-9.36751e-17	0.00215983	-3.06735e-14	1	1	-9.37622
2310016D03RIK	-0.00215983	0.00107991	-1.00016	0.317497	0.549456	-8.87583
2310016D23RIK	0	0	0	1	1	-9.37622
2310016G11RIK	-0.0253458	0.0216792	-1.27203	0.203682	0.431002	-8.56708
2310020H05RIK	0.00764911	0.0244191	0.394635	0.693204	1	-9.29828
2310022A10RIK	2.28178	2.08618	15.7164	1.65688e-49	2.70478e-48	100.189
2310022B05RIK	1.28534	1.15081	10.2015	3.14656e-23	2.46072e-22	39.982
2310026I22RIK	0.0906947	0.093941	2.39345	0.0168894	0.0498213	-6.51787
2310030A07RIK	0.00501496	0.00250748	1.00018	0.317486	0.549456	-8.87581
2310030G06RIK	0.356929	0.299212	4.68174	3.27017e-06	1.36578e-05	1.46614
2310033P09RIK	2.06377	3.19517	12.3707	1.22828e-32	1.26543e-31	61.5009
2310034C09RIK	0	0	0	1	1	-9.37622
2310034G01RIK	0.263501	0.18154	4.75355	2.31706e-06	9.76753e-06	1.79728
2310034O05RIK	0.0689551	0.0387972	2.76677	0.00577451	0.0182627	-5.56063
2310034P14RIK	0.142688	0.274965	2.38594	0.017236	0.0507616	-6.53572
2310035C23RIK	1.31307	5.05247	7.21936	1.08975e-12	6.06985e-12	16.0007
2310036O22RIK	3.50718	5.00971	22.6549	9.9201e-91	5.28774e-89	194.94
2310039H08RIK	0.832401	1.12012	6.3853	2.70472e-10	1.37438e-09	10.5932
2310039L15RIK	0.00843821	0.0042191	1.39136	0.164452	0.363992	-8.40832
2310040G24RIK	1.14897	0.684073	11.4062	2.74299e-28	2.50193e-27	51.5465
2310043L19RIK	0.0138063	0.00690315	1.3907	0.164652	0.364378	-8.40924
2310043O21RIK	0	0	0	1	1	-9.37622
2310045N01RIK	1.75808	2.48809	11.9049	1.66566e-30	1.61279e-29	56.6188
2310047D07RIK	0.0625901	0.118061	1.40805	0.159452	0.356249	-8.38498
2310047M10RIK	2.22445	1.76873	19.8923	1.43121e-73	4.63494e-72	155.477
2310050C09RIK	0	0	0	1	1	-9.37622
2310057J18RIK	0	0	0	1	1	-9.37622
2310057M21RIK	3.1066	3.25762	17.047	7.21153e-57	1.46544e-55	117.093
2310057N15RIK	0	0	0	1	1	-9.37622
2310061J03RIK	1.0494	1.23009	8.74306	1.05602e-17	7.00284e-17	27.383
2310061N02RIK	0	0	0	1	1	-9.37622
2310065F04RIK	0	0	0	1	1	-9.37622
2310067B10RIK	1.62327	2.45935	9.48305	2.01902e-20	1.44817e-19	33.5762
2310067E19RIK	-0.316838	1.6292	-1.70916	0.0877572	0.217853	-7.91644
2310068J16RIK	0.408361	0.624051	5.60065	2.81634e-08	1.30915e-07	6.06274
2310069B03RIK	0	0	0	1	1	-9.37622
2310069G16RIK	1.04315	1.42364	7.40672	2.9153e-13	1.65676e-12	17.2973
2310075C17RIK	0.0795824	2.84336	0.410572	0.681481	1	-9.29186
2310075K07RIK	0.695481	1.01391	5.67099	1.89799e-08	8.88954e-08	6.44638
2310079G19RIK	0	0	0	1	1	-9.37622
2310081J21RIK	0	0	0	1	1	-9.37622
2400006E01RIK	-0.00431965	0.00215983	-1.00018	0.317487	0.549456	-8.87581
2410002F23RIK	2.80694	3.71413	15.254	4.99977e-47	7.66272e-46	94.4971
2410003L11RIK	2.60752e-05	0.0248074	0.00147157	0.998826	1	-9.37622
2410004B18RIK	3.20553	3.32117	18.6738	2.82313e-66	7.43915e-65	138.708
2410004I01RIK	0.149452	0.0747259	4.02645	6.12657e-05	0.000235503	-1.3322
2410004N09RIK	0.629314	1.32962	4.69365	3.08952e-06	1.29329e-05	1.52073
2410004P03RIK	0.186126	0.104783	4.20263	2.89427e-05	0.000113945	-0.619641
2410006H16RIK	1.6858	2.94171	10.1645	4.42729e-23	3.44816e-22	39.6434
2410007B07RIK	0.000272478	0.0646621	0.00822281	0.993441	1	-9.37619
2410012E07RIK	0.0077429	0.00387145	1.00018	0.317485	0.549456	-8.8758
2410012M07RIK	0	0	0	1	1	-9.37622
2410016O06RIK	2.25855	1.59642	16.0474	2.62219e-51	4.49e-50	104.323
2410017I17RIK	0	0	0	1	1	-9.37622
2410018L13RIK	0.137679	0.268915	2.04927	0.0407177	0.111136	-7.27911
2410019O14RIK	0	0	0	1	1	-9.37622
2410021H03RIK	0.155653	0.557593	1.57142	0.116428	0.276473	-8.14194
2410022M11RIK	0.399873	0.333536	5.36509	1.02307e-07	4.6271e-07	4.81066
2410088K16RIK	0	0	0	1	1	-9.37622
2410089E03RIK	-0.322778	6.11163	-2.14619	0.0321176	0.089637	-7.07655
2410114N07RIK	-0.00431965	0.00215983	-1.41599	0.157117	0.353984	-8.37379
2410124H12RIK	0	0	0	1	1	-9.37622
2410127L17RIK	0.674855	1.66744	4.8926	1.17359e-06	5.03104e-06	2.45212
2410131K14RIK	1.93986	1.99633	12.2297	5.5089e-32	5.55159e-31	60.0084
2410137M14RIK	-0.0815405	0.178916	-1.56132	0.11879	0.281133	-8.15773
2410141K09RIK	0	0	0	1	1	-9.37622
2500002B13RIK	0.181864	0.270316	2.6839	0.0074069	0.0231018	-5.78488
2500004C02RIK	1.27711	1.15194	9.56378	9.94994e-21	7.21684e-20	34.277
2510002D24RIK	1.65517	3.39647	9.1243	4.42051e-19	3.05035e-18	30.5213
2510003B16RIK	0.701598	0.814491	7.33437	4.86724e-13	2.74599e-12	16.7931
2510003E04RIK	4.43421	5.2984	25.4547	9.74864e-109	8.69368e-107	236.372
2510009E07RIK	3.29472	3.2887	17.4374	4.34747e-59	9.28352e-58	122.192
2510039O18RIK	1.39933	1.80593	8.83293	5.04797e-18	3.37466e-17	28.1127
2610001J05RIK	3.34167	3.21143	19.2461	1.11795e-69	3.23843e-68	146.529
2610002J02RIK	1.85943	1.52645	12.8917	4.33831e-35	4.77897e-34	67.1177
2610005L07RIK	-0.700732	3.54527	-7.46545	1.91692e-13	1.09606e-12	17.7097
2610008E11RIK	0.648048	3.4209	2.9708	0.00304709	0.0100021	-4.97988
2610015P09RIK	0.31176	2.22605	1.81488	0.0698663	0.179267	-7.73059
2610016A17RIK	0.0145894	0.00729469	1.37841	0.168411	0.369349	-8.42623
2610020C07RIK	0.856435	1.12945	7.49151	1.58996e-13	9.12962e-13	17.8938
2610020H08RIK	0.673144	1.02407	5.57891	3.17883e-08	1.47455e-07	5.94509
2610027F03RIK	0.00431965	0.00215983	1.00018	0.317487	0.549456	-8.87581
2610027K06RIK	0.962171	0.671821	13.5049	4.60435e-38	5.52245e-37	73.9342
2610028E06RIK	-0.00702755	0.0115061	-0.413123	0.679613	1	-9.29081
2610028H24RIK	0.088627	0.131701	2.01127	0.0445868	0.120754	-7.35599
2610034B18RIK	1.10516	1.37581	7.54001	1.12111e-13	6.47998e-13	18.2376
2610035D17RIK	2.19661	1.93517	14.1763	2.01167e-41	2.64961e-40	81.6379
2610035F20RIK	-0.00215983	0.00107991	-1.00016	0.317497	0.549456	-8.87583
2610037D02RIK	0.00215983	0.00107991	1.00016	0.317497	0.549456	-8.87583
2610042L04RIK	-0.0582952	0.103341	-1.4938	0.135569	0.315195	-8.26072
2610044O15RIK8	1.77722	2.72903	10.2389	2.22422e-23	1.74657e-22	40.326
2610100L16RIK	0.262565	3.79026	1.65627	0.098006	0.238765	-8.00525
2610203C20RIK	0.158705	2.75504	0.772014	0.440304	0.722284	-9.07801
2610203C22RIK	-0.0613406	0.253591	-1.07462	0.282826	0.549456	-8.79859
2610206C17RIK	0.129903	0.165706	3.78266	0.000165139	0.000615358	-2.2696
2610300M13RIK	0	0	0	1	1	-9.37622
2610301B20RIK	3.29876	3.54654	18.4905	3.39474e-65	8.63132e-64	136.226
2610305D13RIK	0.0135754	0.00678769	1.26816	0.20506	0.433409	-8.57199
2610306M01RIK	1.4576	1.41085	10.5828	8.7679e-25	7.18731e-24	43.5337
2610307P16RIK	0.0490925	0.0245463	2.13102	0.0333507	0.0927395	-7.10886
2610316D01RIK	0.400267	2.04012	2.2919	0.0221353	0.0638826	-6.7546
2610318N02RIK	0.212627	0.197871	3.45339	0.000578711	0.00205857	-3.44541
2610507I01RIK	1.15282	1.29255	7.88195	9.0424e-15	5.43204e-14	20.7174
2610524H06RIK	1.44081	3.44277	7.49485	1.5523e-13	8.9146e-13	17.9173
2610528A11RIK	0.0428989	0.0214494	2.17345	0.0299994	0.0842638	-7.0179
2610528J11RIK	0.0370102	0.0185051	2.01225	0.0444832	0.120505	-7.35402
2700012I20RIK	0.00174073	0.0571282	0.0486606	0.9612	1	-9.37504
2700029M09RIK	3.12963	4.69945	17.6349	3.20993e-60	7.08123e-59	124.793
2700038G22RIK	-0.0372737	0.465472	-0.367293	0.713485	1	-9.3087
2700046A07RIK	0.00717479	0.0035874	1.00018	0.317485	0.549456	-8.87581
2700046G09RIK	0.540356	0.679507	5.24352	1.95321e-07	8.71844e-07	4.18421
2700049A03RIK	0.417611	2.05108	2.33967	0.0195127	0.0568845	-6.6445
2700054A10RIK	0.195907	0.515437	1.96457	0.0497635	0.133008	-7.44853
2700060E02RIK	4.42969	4.24275	27.9588	3.79089e-125	5.39759e-123	274.142
2700062C07RIK	1.01144	3.37074	6.32565	3.92278e-10	1.9792e-09	10.2296
2700068H02RIK	0.0874772	0.0898775	2.10376	0.0356694	0.09847	-7.16637
2700069I18RIK	0.00215983	0.00107991	1.00016	0.317497	0.549456	-8.87583
2700070H01RIK	0.00342325	0.0081911	0.390464	0.696283	1	-9.29992
2700081O15RIK	1.16998	1.45034	8.61007	3.11197e-17	2.02749e-16	26.315
2700089E24RIK	4.16742	5.36169	25.0323	5.41871e-106	4.47155e-104	230.056
2700089I24RIK	0	0	0	1	1	-9.37622
2700094K13RIK	3.19613	2.11398	24.1218	4.17854e-100	2.92032e-98	216.509
2700097O09RIK	0.526321	2.87906	2.76533	0.00579987	0.0183387	-5.56458
2700099C18RIK	0.78108	1.40075	6.90516	9.31699e-12	5.01141e-11	13.8933
2810001G20RIK	1.76601	2.66404	10.283	1.47629e-23	1.16601e-22	40.7325
2810002D19RIK	0.839493	0.949427	6.53689	1.03716e-10	5.3723e-10	11.5312
2810004N23RIK	1.75055	2.3081	11.5837	4.54169e-29	4.24487e-28	53.3333
2810007J24RIK	0	0	0	1	1	-9.37622
2810008D09RIK	-1.52752	6.52258	-12.9201	3.1733e-35	3.50481e-34	67.4289
2810013P06RIK	1.31669	3.21747	6.56626	8.59416e-11	4.46537e-10	11.7153
2810021J22RIK	0.359102	1.08022	2.66938	0.00773232	0.0240382	-5.82349
2810025M15RIK	2.30605	2.39133	16.7022	6.25325e-55	1.19497e-53	112.642
2810029C07RIK	0.577584	2.33185	2.86624	0.00424805	0.0136938	-5.28256
2810030D12RIK	0.013326	0.00666299	1.70238	0.089021	0.2204	-7.92798
2810032G03RIK	0.863201	0.643345	8.21558	7.08272e-16	4.41126e-15	23.2292
2810039B14RIK	0.208336	0.121323	4.60422	4.71908e-06	1.95209e-05	1.11405
2810047C21RIK1	0	0	0	1	1	-9.37622
2810049E08RIK	-0.352185	1.42166	-2.33555	0.0197276	0.0574552	-6.65408
2810403A07RIK	0.362753	5.63026	2.18063	0.029462	0.0829029	-7.00233
2810404M03RIK	0.0241455	0.0212476	1.41156	0.158416	0.354877	-8.38003
2810405F15RIK	-0.0348319	0.15739	-0.681338	0.495828	0.794199	-9.14393
2810407A14RIK	0.0175467	0.00877335	1.20824	0.227265	0.471584	-8.64614
2810408A11RIK	0.0118904	0.0166454	0.734081	0.463085	0.751467	-9.10659
2810408B13RIK	-0.0195729	0.0731354	-0.460735	0.645097	0.97594	-9.26999
2810408I11RIK	0.114563	0.193867	1.93377	0.0534464	0.141599	-7.50837
2810408M09RIK	1.99274	1.76806	14.3315	3.24805e-42	4.38534e-41	83.4544
2810410L24RIK	0.044301	0.253073	0.707381	0.479508	0.773151	-9.12584
2810416G20RIK	1.03867	0.917798	8.68513	1.69378e-17	1.11353e-16	26.9161
2810417H13RIK	0.103436	0.264661	1.46344	0.143687	0.331336	-8.30555
2810428I15RIK	4.28859	3.4915	32.943	4.72847e-158	1.69752e-155	349.895
2810429I04RIK	0.0732274	0.393767	0.93917	0.347889	0.593323	-8.93496
2810433D01RIK	0.00215983	0.00107991	1.00016	0.317497	0.549456	-8.87583
2810442N19RIK	-0.0526955	0.197934	-0.965505	0.334545	0.574554	-8.90988
2810454H06RIK	0.228332	0.746561	2.10743	0.0353492	0.097676	-7.15867
2810459M11RIK	0.476857	0.49704	4.79939	1.85514e-06	7.86368e-06	2.01117
2810468N07RIK	0.817561	1.40194	4.92425	1.0028e-06	4.31342e-06	2.60371
2810471M01RIK	0	0	0	1	1	-9.37622
2810474O19RIK	1.1858	2.91557	5.99987	2.8319e-09	1.37863e-08	8.29921
2900005J15RIK	0.28604	0.593315	2.62245	0.00887372	0.0273578	-5.94687
2900009J06RIK	0.696162	0.519132	8.25534	5.19748e-16	3.24817e-15	23.5346
2900011O08RIK	3.85171	6.57394	22.8005	1.18381e-91	6.49982e-90	197.063
2900026A02RIK	2.29149	3.2267	12.6089	9.48679e-34	1.00752e-32	64.0482
2900040C04RIK	0	0	0	1	1	-9.37622
2900041M22RIK	0.164292	0.223289	2.52707	0.0116676	0.0352927	-6.19094
2900052N01RIK	0.0224595	0.0241887	1.05061	0.293714	0.549456	-8.8241
2900055J20RIK	-0.366702	6.73561	-2.11543	0.0346604	0.0959305	-7.14184
2900057B20RIK	0	0	0	1	1	-9.37622
2900060B14RIK	1.22226	1.05935	15.4278	5.91472e-48	9.32218e-47	96.6248
2900076A07RIK	0.541131	2.20527	3.21952	0.0013288	0.00454619	-4.21718
2900079G21RIK	0.0766174	4.41336	0.536118	0.592006	0.912369	-9.23239
2900089D17RIK	0.206269	0.32898	2.99247	0.00284089	0.00936771	-4.91584
2900092C05RIK	-0.0147027	0.0129344	-0.95603	0.339307	0.581711	-8.91899
2900092D14RIK	2.03317	2.20633	11.9164	1.47818e-30	1.43357e-29	56.7375
2900097C17RIK	2.76913	5.84467	17.2475	5.26515e-58	1.09319e-56	119.704
3000002C10RIK	0.570035	1.11595	4.56394	5.69759e-06	2.34601e-05	0.933346
3010003L21RIK	0.0172295	0.00861477	1.88182	0.0601747	0.157174	-7.6072
3010026O09RIK	1.68288	1.56849	11.4572	1.64017e-28	1.50683e-27	52.0574
3010033K07RIK	0.00684649	0.00342325	1.00018	0.317485	0.549456	-8.87581
3100003L05RIK	0.0060634	0.0030317	1.00018	0.317486	0.549456	-8.87581
3110001I22RIK	0.0977966	1.23586	0.969732	0.332434	0.57156	-8.90579
3110002H16RIK	1.51836	3.11358	7.83908	1.24629e-14	7.44316e-14	20.4012
3110009E18RIK	0.623486	0.526129	7.23816	9.55903e-13	5.33282e-12	16.1295
3110009F21RIK	0	0	0	1	1	-9.37622
3110009M11RIK	0.0119599	0.0331122	0.442455	0.658263	0.990188	-9.27825
3110015C05RIK	0.0243343	0.0121672	1.4071	0.159734	0.356721	-8.38631
3110021A11RIK	0.0290757	0.566546	0.279088	0.78024	1	-9.33724
3110021N24RIK	-0.191648	3.15417	-1.18171	0.237625	0.48931	-8.67782
3110035E14RIK	2.20175	5.93165	9.90917	4.56634e-22	3.45212e-21	37.33
3110039I08RIK	0.00895082	0.647787	0.090697	0.927753	1	-9.3721
3110039M20RIK	1.29788	2.27595	8.41481	1.48388e-16	9.445e-16	24.7721
3110040M04RIK	0	0	0	1	1	-9.37622
3110040N11RIK	1.99585	1.83792	13.7775	2.04996e-39	2.54822e-38	77.0326
3110043O21RIK	1.68608	2.71911	9.5503	1.12019e-20	8.11509e-20	34.1596
3110045C21RIK	0.413798	0.306862	5.95682	3.65227e-09	1.76695e-08	8.05114
3110052M02RIK	1.41563	3.32225	7.72348	2.93852e-14	1.73352e-13	19.5561
3110053B16RIK	1.05582	1.10244	8.52443	6.19635e-17	3.9918e-16	25.6346
3110056K07RIK	-0.0685643	3.35889	-0.369181	0.712078	1	-9.30801
3110057O12RIK	-0.402246	3.91469	-2.17489	0.0298916	0.0839879	-7.0148
3110062M04RIK	0.461125	1.42846	3.21562	0.00134679	0.00460513	-4.22961
3110070M22RIK	0.220813	0.258091	3.41524	0.000665	0.00235237	-3.57493
3110079O15RIK	0.171454	0.146537	3.57985	0.00036168	0.00130816	-3.00613
3110082I17RIK	0.983332	2.10452	6.39332	2.57235e-10	1.30918e-09	10.6422
3110082J24RIK	0	0	0	1	1	-9.37622
3110099E03RIK	0	0	0	1	1	-9.37622
3200001D21RIK	0.0729615	0.324029	0.963035	0.335782	0.57642	-8.91227
3300002A11RIK	0.0192684	0.0263834	0.973998	0.330312	0.568331	-8.90165
3300002I08RIK	0.247758	0.675561	2.33511	0.0197507	0.0575105	-6.65511
3300002P13RIK	0.742738	1.24143	5.44538	6.62709e-08	3.02694e-07	5.23179
3300005D01RIK	-0.0077429	0.00387145	-1.00018	0.317485	0.549456	-8.8758
3425401B19RIK	-0.0175017	0.00875085	-1.40105	0.161534	0.359294	-8.3948
3632451O06RIK	1.79058	2.08042	10.2022	3.12531e-23	2.445e-22	39.9887
3830406C13RIK	2.17504	3.33802	12.1725	1.00897e-31	1.00952e-30	59.4066
3830408C21RIK	0.289862	0.384906	3.56797	0.000378249	0.00136585	-3.04807
3830432H09RIK	0.023643	0.0272856	0.974192	0.330216	0.568212	-8.90146
3930402G23RIK	0.0201578	0.0277568	0.762841	0.445753	0.729059	-9.08505
4430402I18RIK	0.406892	1.36078	3.111	0.00192174	0.00645752	-4.55734
4631405J19RIK	-0.00285514	0.00574722	-0.410355	0.68164	1	-9.29195
4631405K08RIK	-0.0150199	0.00750993	-1.00018	0.317484	0.549456	-8.8758
4632404H12RIK	0.514084	0.917717	4.11482	4.22066e-05	0.000164301	-0.978467
4632415L05RIK	1.73174	2.11629	10.3005	1.25352e-23	9.91743e-23	40.8948
4632427E13RIK	-0.00907294	2.97316	-0.0502407	0.959941	1	-9.37496
4632428C04RIK	0.164382	0.128232	3.71746	0.000213335	0.000786578	-2.51067
4632428N05RIK	-0.0751194	0.0610676	-1.83163	0.0673287	0.173529	-7.70013
4732414G09RIK	0.255704	0.267201	3.85322	0.000124626	0.000469393	-2.00412
4732416N19RIK	0.130547	0.287691	2.09278	0.0366408	0.100924	-7.18931
4732419C18RIK	-0.0170833	0.0585466	-0.524277	0.600211	0.922522	-9.23867
4732440D04RIK	0.0027396	1.66228	0.0181693	0.985508	1	-9.37606
4732456N10RIK	0.00672889	0.00678769	0.628175	0.530044	0.838327	-9.17876
4732465J04RIK	0	0	0	1	1	-9.37622
4732471J01RIK	0.563727	2.13354	3.59024	0.000347759	0.00126096	-2.96936
4732490B19RIK	0.010988	0.00549402	1.00018	0.317484	0.549456	-8.8758
4732491K20RIK	1.00031	1.38532	7.19444	1.29578e-12	7.19833e-12	15.8306
4831407H17RIK	0.0716758	0.0965672	1.66375	0.0965017	0.23551	-7.99286
4831440D22RIK	0.0948718	0.585524	0.845845	0.397858	0.66515	-9.01827
4831440E17RIK	0.133416	1.40086	0.809136	0.418645	0.692679	-9.04865
4833403I15RIK	-0.00215983	0.0109826	-0.149052	0.881545	1	-9.3651
4833411C07RIK	-0.00488191	0.0575159	-0.139155	0.889358	1	-9.36653
4833412C05RIK	0.387265	0.280155	5.339	1.17664e-07	5.30797e-07	4.6751
4833415N18RIK	0.396172	0.310241	5.30189	1.43421e-07	6.44361e-07	4.4833
4833417C18RIK	0.0461199	0.188491	0.797589	0.425314	0.701752	-9.05793
4833418N02RIK	0.0744292	0.10105	1.87259	0.0614412	0.160153	-7.62448
4833419F23RIK	0.0953248	0.0476624	3.47454	0.000535496	0.00191002	-3.37301
4833420G17RIK	0.290091	5.39036	1.70171	0.0891467	0.22065	-7.92912
4833422C13RIK	1.31749	2.75389	7.31444	5.6012e-13	3.15329e-12	16.655
4833422M21RIK	0.0238775	0.0119387	1.74298	0.0816691	0.20599	-7.85818
4833423E24RIK	0	0	0	1	1	-9.37622
4833427F10RIK	0	0	0	1	1	-9.37622
4833427G06RIK	0.0373487	0.0186743	2.42545	0.01548	0.0459804	-6.44117
4833428L15RIK	0	0	0	1	1	-9.37622
4833438C02RIK	-0.06705	0.196415	-0.993447	0.320752	0.554244	-8.88252
4833439L19RIK	3.56184	4.73207	18.6723	2.88081e-66	7.58638e-65	138.688
4833447I15RIK	-0.0622819	0.253028	-0.917504	0.359118	0.609776	-8.95508
4833447P13RIK	0.096333	0.073826	2.81197	0.00502815	0.0160497	-5.43547
4921501E09RIK	-0.00475555	0.0342781	-0.145564	0.884297	1	-9.36562
4921504A21RIK	0.079145	1.00051	0.594706	0.552185	0.865976	-9.19924
4921504E06RIK	-0.00900632	0.00882281	-0.910054	0.363031	0.615078	-8.96189
4921506M07RIK	-0.0077429	0.00387145	-1.00018	0.317485	0.549456	-8.8758
4921507G05RIK	0.0507964	0.0378278	2.09426	0.036509	0.100596	-7.18624
4921507L20RIK	0.0271566	0.296877	0.394061	0.693627	1	-9.29851
4921507P07RIK	0.0942907	0.24271	1.44255	0.149487	0.343165	-8.33587
4921508D12RIK	0	0	0	1	1	-9.37622
4921509C19RIK	0.0574189	0.0308693	4.86019	1.3773e-06	5.88393e-06	2.29791
4921509O07RIK	0.0193894	0.00969469	1.3999	0.161878	0.359926	-8.3964
4921511C10RIK	-0.220704	0.630676	-2.39649	0.0167509	0.0494407	-6.51064
4921511H03RIK	-0.150406	0.326441	-1.72599	0.0846835	0.211434	-7.88759
4921511I17RIK	0.785592	0.895387	9.66866	3.93934e-21	2.89424e-20	35.1947
4921513H07RIK	0.211166	0.531366	2.04223	0.0414125	0.112827	-7.29346
4921513I03RIK	-0.0357427	0.0443222	-1.2209	0.222434	0.463482	-8.63076
4921515E04RIK	0.00900632	0.00666299	1.47626	0.140215	0.324578	-8.28673
4921517D16RIK	0.043406	0.0238628	2.0921	0.0367022	0.101069	-7.19074
4921517D22RIK	0.00647948	0.00539957	1.34538	0.178833	0.387532	-8.47117
4921518K17RIK	0.00126342	0.00495136	0.249452	0.803066	1	-9.34508
4921524J17RIK	3.28889	2.79341	22.4646	1.59008e-89	8.15482e-88	192.168
4921524L21RIK	-0.0077429	0.00603128	-1.40872	0.159255	0.355981	-8.38404
4921525O09RIK	0	0	0	1	1	-9.37622
4921528I07RIK	0	0	0	1	1	-9.37622
4921529L05RIK	0.00900632	0.00666299	0.79204	0.428541	0.706353	-9.06235
4921530L21RIK	-0.00900632	0.00450316	-1.00018	0.317485	0.549456	-8.8758
4921531C22RIK	0.208292	0.815276	1.72955	0.0840444	0.210176	-7.88145
4921531P14RIK	0	0	0	1	1	-9.37622
4921533I20RIK	0	0	0	1	1	-9.37622
4921534H16RIK	0.0490123	0.19969	0.824122	0.410083	0.681465	-9.03641
4921536K21RIK	-0.00147475	0.0241345	-0.071825	0.942757	1	-9.37364
4921539E11RIK	0.04261	0.0393748	1.6677	0.0957149	0.233902	-7.9863
4921539H07RIK	0.0973809	0.156948	1.79499	0.0729811	0.186371	-7.76639
4922502D21RIK	0	0	0	1	1	-9.37622
4922502H24RIK	-0.00215983	0.00107991	-1.00016	0.317497	0.549456	-8.87583
4922502N22RIK	0	0	0	1	1	-9.37622
4930401C15RIK	0.00179282	0.013326	0.119127	0.905201	1	-9.36912
4930401G09RIK	-0.0205273	0.211536	-0.46625	0.641146	0.970907	-9.26743
4930401O10RIK	0.00717479	0.0035874	1.00018	0.317485	0.549456	-8.87581
4930401O12RIK	0	0	0	1	1	-9.37622
4930402D18RIK	0	0	0	1	1	-9.37622
4930402F06RIK	0	0	0	1	1	-9.37622
4930402F11RIK	0	0	0	1	1	-9.37622
4930402H24RIK	-0.337472	6.12428	-2.16877	0.0303548	0.085147	-7.02804
4930403D09RIK	0	0	0	1	1	-9.37622
4930404A05RIK	0	0	0	1	1	-9.37622
4930404H11RIK	0.130685	0.0808065	3.08607	0.00208861	0.00699472	-4.63388
4930404H24RIK	0.171578	0.22307	2.51087	0.0122129	0.0368388	-6.2315
4930404I05RIK	-0.0960148	0.300385	-1.18837	0.234991	0.484552	-8.66993
4930404I20RIK	0	0	0	1	1	-9.37622
4930404K13RIK	0.234674	0.854699	1.79368	0.0731914	0.186862	-7.76875
4930404N11RIK	0.572977	0.56369	7.82855	1.3482e-14	8.0427e-14	20.3237
4930405A10RIK	0.00342325	0.00171162	1.00017	0.317489	0.549456	-8.87581
4930405A21RIK	-0.0654353	0.510175	-0.840015	0.401117	0.669666	-9.02319
4930405D01RIK	0	0	0	1	1	-9.37622
4930405D11RIK	0	0	0	1	1	-9.37622
4930405J17RIK	0.0216726	0.0371428	0.946202	0.344293	0.588515	-8.92834
4930405L22RIK	0	0	0	1	1	-9.37622
4930405O22RIK	0.0197407	0.36008	0.266758	0.789715	1	-9.34061
4930406D18RIK	0	0	0	1	1	-9.37622
4930407G08RIK	0.0168625	0.00843127	1.56794	0.117238	0.278038	-8.14739
4930407I02RIK	0.0749528	0.0789487	1.93644	0.053119	0.14082	-7.50323
4930407I10RIK	0	0	0	1	1	-9.37622
4930407I19RIK	0.00215983	0.00107991	1.00016	0.317497	0.549456	-8.87583
4930412B13RIK	0.00342325	0.00171162	1.00017	0.317489	0.549456	-8.87581
4930412C18RIK	0.0997683	0.154671	1.89053	0.0589993	0.154421	-7.59081
4930412E21RIK	0.00863931	0.00431965	1.00018	0.317485	0.549456	-8.8758
4930412L05RIK	0.147599	0.142161	2.69266	0.00721661	0.0225401	-5.76149
4930412O13RIK	0	0	0	1	1	-9.37622
4930413E15RIK	0	0	0	1	1	-9.37622
4930413F20RIK	-0.0606776	0.467489	-0.76178	0.446385	0.729923	-9.08586
4930413G21RIK	0.460956	0.94653	5.84015	7.21834e-09	3.44654e-08	7.38726
4930413M19RIK	0	0	0	1	1	-9.37622
4930414F18RIK	0.00891043	0.0196699	0.461467	0.644572	0.975252	-9.26965
4930414L22RIK	0.205547	3.75013	1.41724	0.156749	0.353984	-8.37201
4930414N06RIK	-0.273327	0.588443	-3.25469	0.00117637	0.00405243	-4.10451
4930415F15RIK	0.048748	0.128115	1.00793	0.31375	0.549456	-8.86802
4930415O20RIK	-0.0245407	0.0657518	-0.734811	0.462641	0.750833	-9.10605
4930417H01RIK	0.285995	0.321168	3.98901	7.1592e-05	0.000274193	-1.47984
4930417O13RIK	0.00215983	0.00107991	1.00016	0.317497	0.549456	-8.87583
4930417O22RIK	0	0	0	1	1	-9.37622
4930419G24RIK	-0.590563	2.59152	-4.10842	4.33709e-05	0.00016863	-1.00432
4930421P05RIK	0.0315167	0.177355	0.514561	0.606983	0.930003	-9.24372
4930421P07RIK	0	0	0	1	1	-9.37622
4930423D24RIK	0	0	0	1	1	-9.37622
4930423M02RIK	0.00990273	0.00495136	1.00018	0.317485	0.549456	-8.8758
4930425K10RIK	-0.00501496	0.00857088	-0.397167	0.691336	1	-9.29728
4930425L21RIK	0.00647948	0.00930314	0.584598	0.558961	0.874968	-9.2052
4930425O10RIK	0	0	0	1	1	-9.37622
4930426D05RIK	0.0148482	0.0914088	0.339473	0.734331	1	-9.31854
4930426I24RIK	0.0321499	0.196359	0.624256	0.532613	0.841693	-9.18122
4930426L09RIK	0.0727504	0.0604361	2.31263	0.0209621	0.0607707	-6.70711
4930427A07RIK	0.0833345	0.127516	1.51973	0.12892	0.301757	-8.2217
4930428D20RIK	0	0	0	1	1	-9.37622
4930428E07RIK	0.00236093	0.0173616	0.190644	0.848847	1	-9.35803
4930428G15RIK	0.0426286	0.0293066	2.1031	0.0357269	0.0986158	-7.16775
4930428N03RIK	0	0	0	1	1	-9.37622
4930428O21RIK	0	0	0	1	1	-9.37622
4930429B21RIK	1.64887	1.30115	12.3709	1.22599e-32	1.26338e-31	61.5027
4930429D17RIK	0	0	0	1	1	-9.37622
4930429F11RIK	0	0	0	1	1	-9.37622
4930429F24RIK	0.0156145	0.0685955	0.432833	0.665237	0.998605	-9.28246
4930429P21RIK	0.289055	0.27195	4.711	2.84339e-06	1.19216e-05	1.6005
4930430A15RIK	0.010878	0.0332368	0.729577	0.465833	0.755197	-9.10989
4930430E12RIK	0.00647948	0.00323974	1.00018	0.317485	0.549456	-8.87581
4930430F08RIK	1.12415	2.50995	6.3206	4.04787e-10	2.04158e-09	10.1989
4930430F21RIK	0.0223381	0.04499	0.857846	0.3912	0.655603	-9.00805
4930430J02RIK	0.0514656	0.0365319	2.36214	0.0183761	0.0538289	-6.59194
4930431F10RIK	0.000896409	0.00387145	0.195516	0.845032	1	-9.35709
4930431F12RIK	-0.00126342	0.00711119	-0.213906	0.830667	1	-9.35332
4930431P03RIK	0	0	0	1	1	-9.37622
4930431P22RIK	0.0592466	0.0296233	2.72745	0.00650346	0.0204174	-5.66786
4930432E11RIK	0	0	0	1	1	-9.37622
4930432J09RIK	0	0	0	1	1	-9.37622
4930432K21RIK	0.199248	0.471767	2.06761	0.0389544	0.106676	-7.24148
4930432L08RIK	-0.0538137	0.0269068	-1.79715	0.0726384	0.185631	-7.76253
4930432M17RIK	0	0	0	1	1	-9.37622
4930432O09RIK	0	0	0	1	1	-9.37622
4930433B08RIK	0	0	0	1	1	-9.37622
4930433I11RIK	0	0	0	1	1	-9.37622
4930433N12RIK	0	0	0	1	1	-9.37622
4930434B07RIK	0	0	0	1	1	-9.37622
4930434J06RIK	-0.00422073	0.00858984	-0.359646	0.719194	1	-9.31149
4930435E12RIK	0	0	0	1	1	-9.37622
4930435F18RIK	-0.0163822	0.015934	-1.82518	0.0682966	0.17569	-7.71189
4930437M23RIK	0	0	0	1	1	-9.37622
4930438A08RIK	0.0119299	0.00596497	1.00018	0.317484	0.549456	-8.8758
4930438E09RIK	0	0	0	1	1	-9.37622
4930439A04RIK	0.0757653	0.766319	0.606609	0.54426	0.855978	-9.19208
4930440C22RIK	0	0	0	1	1	-9.37622
4930440I19RIK	0.0117198	0.0058599	1.00018	0.317484	0.549456	-8.8758
4930441J16RIK	0.00342325	0.00171162	1.00017	0.317489	0.549456	-8.87581
4930442E04RIK	0.000937142	0.0251292	0.0445447	0.96448	1	-9.37523
4930442J19RIK	0	0	0	1	1	-9.37622
4930442L01RIK	0	0	0	1	1	-9.37622
4930443O20RIK	-0.0145053	0.141317	-0.30983	0.75676	1	-9.32818
4930444A19RIK	-0.0851158	0.14872	-1.62376	0.104767	0.252353	-8.05846
4930444F02RIK	0.142461	0.160842	2.71831	0.0066844	0.0209604	-5.69257
4930444G20RIK	0	0	0	1	1	-9.37622
4930444M15RIK	-0.0205141	0.0359248	-0.691517	0.489414	0.786203	-9.13694
4930444P10RIK	0.0291068	0.217685	0.500922	0.616545	0.941358	-9.25065
4930445E18RIK	0.02056	0.0386175	0.756114	0.449774	0.734377	-9.09017
4930445N18RIK	-0.0114944	0.00574722	-1.00018	0.317484	0.549456	-8.8758
4930447A16RIK	0.115793	0.692752	1.13809	0.255376	0.519297	-8.72839
4930447C04RIK	-0.491938	2.14684	-2.5586	0.0106679	0.0325076	-6.11125
4930447F24RIK	0.0726891	0.761606	0.640747	0.521846	0.827792	-9.17078
4930447J18RIK	0	0	0	1	1	-9.37622
4930447K03RIK	0.0673217	0.0478832	4.45448	9.43848e-06	3.83297e-05	0.449913
4930447M23RIK	2.20725	2.19663	12.2675	3.68703e-32	3.74344e-31	60.4077
4930447N08RIK	0.170369	0.12173	4.20241	2.89705e-05	0.000114033	-0.620557
4930448C13RIK	0	0	0	1	1	-9.37622
4930448F12RIK	-0.00647948	0.00323974	-1.00018	0.317485	0.549456	-8.87581
4930448H16RIK	0.0225099	0.0112549	1.43845	0.150646	0.345525	-8.34177
4930448I06RIK	0	0	0	1	1	-9.37622
4930448I18RIK	-0.012598	0.00629902	-1.00018	0.317484	0.549456	-8.8758
4930448K20RIK	0.00215983	0.00107991	1.00016	0.317497	0.549456	-8.87583
4930449C09RIK	0	0	0	1	1	-9.37622
4930449E01RIK	0.0291951	0.0587156	0.952288	0.3412	0.584455	-8.92256
4930449E18RIK	0.000889816	0.0782169	0.0269474	0.978508	1	-9.37586
4930449I24RIK	0	0	0	1	1	-9.37622
4930451E10RIK	0.0315324	0.0290486	1.41288	0.158028	0.35469	-8.37818
4930451G09RIK	0.158442	0.246107	2.3175	0.0206939	0.060053	-6.69587
4930451I11RIK	0.249804	0.17048	5.07802	4.6124e-07	2.01891e-06	3.35322
4930452A19RIK	0	0	0	1	1	-9.37622
4930452B06RIK	1.51335	1.27947	10.6941	3.02621e-25	2.51553e-24	44.5894
4930452G13RIK	0.00863931	0.00431965	1.00018	0.317485	0.549456	-8.8758
4930452N14RIK	0.0390959	0.0281873	2.19761	0.0282244	0.0797677	-6.96533
4930453L07RIK	0	0	0	1	1	-9.37622
4930453N24RIK	2.70263	2.97948	15.4281	5.89158e-48	9.28919e-47	96.6287
4930453O03RIK	0	0	0	1	1	-9.37622
4930455B14RIK	0.00431965	0.00215983	1.00018	0.317487	0.549456	-8.87581
4930455C13RIK	0.859668	1.24043	7.34314	4.5751e-13	2.58325e-12	16.854
4930455D15RIK	-0.00655054	0.102582	-0.235954	0.813521	1	-9.34836
4930455F16RIK	-0.0119299	0.0102846	-0.801347	0.423137	0.698847	-9.05493
4930455G09RIK	0.0099396	0.0214163	0.498831	0.618017	0.943103	-9.2517
4930455H04RIK	0.147052	0.38196	2.20698	0.0275609	0.078066	-6.94479
4930455J16RIK	0	0	0	1	1	-9.37622
4930456L15RIK	-0.0102697	0.00513487	-1.00018	0.317484	0.549456	-8.8758
4930458A03RIK	0	0	0	1	1	-9.37622
4930459C07RIK	0	0	0	1	1	-9.37622
4930459I23RIK	0	0	0	1	1	-9.37622
4930459L07RIK	0	0	0	1	1	-9.37622
4930461C15RIK	0.0760754	0.0836584	1.73619	0.0828631	0.207863	-7.86997
4930461G14RIK	0.00144676	0.0125148	0.0960231	0.923523	1	-9.37161
4930463O16RIK	0.00215983	0.00107991	1.00016	0.317497	0.549456	-8.87583
4930465K10RIK	-0.0296707	0.0857745	-0.677722	0.498117	0.797075	-9.14639
4930465M20RIK	0	0	0	1	1	-9.37622
4930467D21RIK	0.0316999	0.0261197	1.45282	0.146614	0.337344	-8.32102
4930467E23RIK	-0.00142933	0.0230082	-0.087165	0.930559	1	-9.37242
4930467J12RIK	0	0	0	1	1	-9.37622
4930467K11RIK	0.0135112	0.0548094	0.412611	0.679988	1	-9.29102
4930469G21RIK	-0.268348	0.964558	-2.49414	0.0128001	0.0385048	-6.27315
4930469K13RIK	0	0	0	1	1	-9.37622
4930470H14RIK	0.0279452	0.0396105	1.25186	0.210937	0.443642	-8.59251
4930470O06RIK	0.00437481	0.0104106	0.342324	0.732185	1	-9.31757
4930470P17RIK	0.00843821	0.0042191	1.39136	0.164452	0.363992	-8.40832
4930471C04RIK	0.0675867	0.0950674	1.64545	0.100217	0.243375	-8.02308
4930471G03RIK	-3.747e-16	0.00863931	-3.40381e-14	1	1	-9.37622
4930471G24RIK	0.0060634	0.0030317	1.00018	0.317486	0.549456	-8.87581
4930471L23RIK	0	0	0	1	1	-9.37622
4930471M09RIK	0.0427783	0.0351204	1.65145	0.0989859	0.240789	-8.0132
4930473A02RIK	1.17424	3.06423	8.35149	2.44673e-16	1.54588e-15	24.2783
4930473H19RIK	0.508317	0.632184	6.41399	2.25944e-10	1.1516e-09	10.7691
4930473O22RIK	0	0	0	1	1	-9.37622
4930474G06RIK	-0.00933462	0.00466731	-1.41207	0.158265	0.35471	-8.37931
4930474H20RIK	0	0	0	1	1	-9.37622
4930474M22RIK	0.018152	0.0213275	0.939274	0.347836	0.593316	-8.93487
4930474N05RIK	0	0	0	1	1	-9.37622
4930474N09RIK	-0.0201388	0.0207696	-0.828993	0.407322	0.677601	-9.03239
4930477N07RIK	0.00431965	0.00215983	1.41599	0.157117	0.353984	-8.37379
4930478L05RIK	0.0206924	0.232895	0.298683	0.765249	1	-9.33157
4930478P22RIK	0	0	0	1	1	-9.37622
4930479D17RIK	0.393458	0.31003	5.49198	5.13749e-08	2.35797e-07	5.47888
4930479H17RIK	-0.0112515	0.00562576	-1.00018	0.317484	0.549456	-8.8758
4930480G23RIK	0	0	0	1	1	-9.37622
4930480K15RIK	0.217377	2.9123	1.14292	0.253366	0.516183	-8.72288
4930480K23RIK	0.127407	0.580314	1.20912	0.226925	0.470994	-8.64507
4930480M12RIK	0	0	0	1	1	-9.37622
4930481A15RIK	0.977429	0.89902	13.6352	1.04625e-38	1.27638e-37	75.4095
4930482G09RIK	-0.0171933	0.0428134	-0.569706	0.569016	0.884871	-9.2138
4930483J18RIK	0.0055819	0.0345303	0.197853	0.843204	1	-9.35663
4930483K19RIK	0.00202534	0.206279	0.0401163	0.968009	1	-9.37541
4930483O08RIK	0	0	0	1	1	-9.37622
4930484H19RIK	0.0278239	0.0230868	1.4114	0.158462	0.354961	-8.38025
4930486F22RIK	-0.00256127	0.025685	-0.133199	0.894065	1	-9.36734
4930486I03RIK	0	0	0	1	1	-9.37622
4930486L24RIK	0	0	0	1	1	-9.37622
4930487D11RIK	0	0	0	1	1	-9.37622
4930487H11RIK	-0.00571027	0.00933462	-0.435643	0.663197	0.996219	-9.28124
4930488B22RIK	0	0	0	1	1	-9.37622
4930488L21RIK	0.0820581	0.154023	1.692	0.0909836	0.224547	-7.94556
4930488N24RIK	0	0	0	1	1	-9.37622
4930500A05RIK	0.242721	0.370322	3.20594	0.00139243	0.00475459	-4.2604
4930500F04RIK	0.00342325	0.00171162	1.00017	0.317489	0.549456	-8.87581
4930500H12RIK	0.0196044	0.0200719	1.03549	0.300709	0.549456	-8.83987
4930500J02RIK	-0.0142976	0.163728	-0.240046	0.810348	1	-9.34738
4930500L23RIK	0	0	0	1	1	-9.37622
4930502A04RIK	0	0	0	1	1	-9.37622
4930502C15RIK	0.00444989	0.364383	0.0502268	0.959953	1	-9.37496
4930502E09RIK	0.00189097	0.0409628	0.075343	0.939958	1	-9.37338
4930502M04RIK	0	0	0	1	1	-9.37622
4930503B20RIK	0.0839499	0.184902	1.49242	0.135929	0.315822	-8.26277
4930503E14RIK	0	0	0	1	1	-9.37622
4930503E24RIK	0.105507	0.0712954	5.60351	2.77161e-08	1.28864e-07	6.07829
4930503F20RIK	0	0	0	1	1	-9.37622
4930503L19RIK	-0.221638	2.21452	-1.15037	0.250291	0.510883	-8.71435
4930503O07RIK	0	0	0	1	1	-9.37622
4930504C09RIK	-0.00717479	0.00574722	-0.920766	0.357413	0.607249	-8.95208
4930504O13RIK	0	0	0	1	1	-9.37622
4930505A04RIK	0.101625	0.137778	2.13295	0.0331918	0.0923403	-7.10477
4930505G20RIK	-0.00863931	0.00431965	-1.00018	0.317485	0.549456	-8.8758
4930505K13RIK	-0.00630658	0.0149447	-0.400958	0.688544	1	-9.29576
4930505K14RIK	0	0	0	1	1	-9.37622
4930505N22RIK	-0.224779	0.961458	-1.70735	0.0880921	0.218529	-7.91951
4930505O20RIK	0	0	0	1	1	-9.37622
4930506A18RIK	-0.0157194	0.180118	-0.312884	0.754439	1	-9.32723
4930506C21RIK	1.35749	3.43703	9.55279	1.09593e-20	7.94069e-20	34.1813
4930506M07RIK	0.0592797	4.29596	0.346287	0.729206	1	-9.31621
4930507D05RIK	0.379543	0.745447	3.58949	0.000348743	0.00126442	-2.97201
4930507D10RIK	-0.0126522	0.00632611	-1.00018	0.317484	0.549456	-8.8758
4930509E16RIK	0.00647948	0.00323974	1.34304	0.179588	0.388306	-8.47431
4930509J09RIK	-0.0436253	0.183837	-0.835543	0.403628	0.672868	-9.02693
4930509K18RIK	0.00717479	0.0035874	1.31526	0.188747	0.404391	-8.51119
4930511A02RIK	0	0	0	1	1	-9.37622
4930511A08RIK	-0.0313962	0.627175	-0.261675	0.79363	1	-9.34195
4930511E03RIK	0	0	0	1	1	-9.37622
4930511M06RIK	0.0587237	0.0293619	2.8049	0.00513874	0.016379	-5.45517
4930512B01RIK	-0.0453034	1.15289	-0.40664	0.684367	1	-9.29347
4930512H18RIK	0	0	0	1	1	-9.37622
4930512J16RIK	-0.0110784	0.00553918	-1.00018	0.317484	0.549456	-8.8758
4930513D17RIK	0.0862777	0.0517781	3.06333	0.00225228	0.00751473	-4.70315
4930513L16RIK	-0.0523789	0.0951319	-1.16068	0.246071	0.503689	-8.70244
4930513N10RIK	0.248944	0.502882	3.54293	0.000415508	0.00149448	-3.13598
4930515B02RIK	0	0	0	1	1	-9.37622
4930515G01RIK	0.0056018	0.0719393	0.153717	0.877866	1	-9.36439
4930515G16RIK	0	0	0	1	1	-9.37622
4930515L03RIK	0.00390357	0.00969469	0.345442	0.729841	1	-9.3165
4930517E11RIK	-0.121562	0.193981	-1.81957	0.0691483	0.17763	-7.72209
4930517G24RIK	0.010598	0.00529902	1.33452	0.182363	0.393275	-8.48571
4930517M08RIK	0	0	0	1	1	-9.37622
4930517O19RIK	0.198477	0.553734	1.82258	0.0686896	0.176605	-7.71662
4930518F22RIK	0.645078	1.39829	6.35849	3.19789e-10	1.6193e-09	10.4294
4930518J21RIK	0	0	0	1	1	-9.37622
4930518P08RIK	0	0	0	1	1	-9.37622
4930519D14RIK	0	0	0	1	1	-9.37622
4930519F09RIK	0.0243745	0.0208266	2.07012	0.0387183	0.106075	-7.23631
4930519F24RIK	-0.00684649	0.00684649	-0.63257	0.527171	0.8346	-9.17599
4930519G04RIK	0.00920742	0.0207848	0.726759	0.467558	0.757437	-9.11194
4930519H02RIK	0.00342325	0.00387145	0.746855	0.455341	0.74099	-9.09713
4930520O04RIK	0.113262	0.22724	1.7479	0.0808138	0.20409	-7.84962
4930520P13RIK	0	0	0	1	1	-9.37622
4930521E06RIK	-0.0141568	0.00707839	-1.00018	0.317484	0.549456	-8.8758
4930521O11RIK	-0.00379025	0.0105344	-0.4973	0.619096	0.944359	-9.25246
4930521O17RIK	0	0	0	1	1	-9.37622
4930522H14RIK	0.00342325	0.00171162	1.00017	0.317489	0.549456	-8.87581
4930522L14RIK	0.165019	0.8036	1.74953	0.0805313	0.203425	-7.84678
4930522O17RIK	0	0	0	1	1	-9.37622
4930522P08RIK	-0.0155777	0.283417	-0.267738	0.788961	1	-9.34034
4930523C07RIK	-0.0118615	0.00593073	-1.00018	0.317484	0.549456	-8.8758
4930523O13RIK	0	0	0	1	1	-9.37622
4930524B15RIK	-0.000193562	0.0407215	-0.00597257	0.995236	1	-9.3762
4930524B17RIK	0	0	0	1	1	-9.37622
4930524C18RIK	0	0	0	1	1	-9.37622
4930524O05RIK	0.00215983	0.00107991	1.00016	0.317497	0.549456	-8.87583
4930524O08RIK	0.0236529	0.0118264	1.56128	0.1188	0.281141	-8.1578
4930525C09RIK	-0.0289802	0.0144901	-1.70667	0.0882184	0.218778	-7.92067
4930525D18RIK	0.0169584	0.00847921	1.6639	0.0964717	0.235464	-7.99261
4930525G20RIK	0.234547	0.363883	2.71949	0.00666079	0.0208911	-5.68939
4930526A20RIK	0.11077	0.125716	3.76469	0.000177283	0.000658569	-2.33645
4930526F13RIK	0.00215983	0.00107991	1.00016	0.317497	0.549456	-8.87583
4930526H09RIK	0	0	0	1	1	-9.37622
4930526I15RIK	0.799698	1.10362	7.58433	8.13349e-14	4.72649e-13	18.5535
4930526L06RIK	0	0	0	1	1	-9.37622
4930527F14RIK	0.00870933	0.0118264	0.769577	0.441748	0.724031	-9.07989
4930527G23RIK	0	0	0	1	1	-9.37622
4930528A17RIK	-0.884306	3.71948	-10.8633	5.90402e-26	5.01997e-25	46.2116
4930528D03RIK	-0.0173149	0.0185602	-0.911043	0.36251	0.614443	-8.96099
4930528G23RIK	0.00674208	0.0519778	0.234968	0.814286	1	-9.34859
4930528H21RIK	0	0	0	1	1	-9.37622
4930528P14RIK	0	0	0	1	1	-9.37622
4930529C04RIK	0.00179282	0.00990273	0.250821	0.802009	1	-9.34473
4930529K09RIK	0	0	0	1	1	-9.37622
4930529L06RIK	0	0	0	1	1	-9.37622
4930529N20RIK	0	0	0	1	1	-9.37622
4930532I03RIK	0.0356967	2.03221	0.196534	0.844235	1	-9.35689
4930532M18RIK	0.012598	0.00629902	1.28763	0.198197	0.421449	-8.54713
4930533B01RIK	0.0149692	0.0654194	0.519366	0.60363	0.926217	-9.24123
4930533I22RIK	2.79756	3.43576	17.4306	4.75954e-59	1.01583e-57	122.102
4930533K18RIK	-0.0139513	0.00697563	-1.00018	0.317484	0.549456	-8.8758
4930533N22RIK	-0.0116833	0.0101613	-1.08152	0.279747	0.549456	-8.79115
4930533P14RIK	0	0	0	1	1	-9.37622
4930535L15RIK	0.0424378	0.0491343	1.57039	0.116666	0.276963	-8.14355
4930535O05RIK	0	0	0	1	1	-9.37622
4930538E20RIK	1.5858	2.61295	12.8424	7.45196e-35	8.14268e-34	66.5794
4930538K18RIK	0.433098	0.406714	5.36404	1.02887e-07	4.65233e-07	4.80518
4930538L07RIK	0	0	0	1	1	-9.37622
4930539C22RIK	-0.00822323	0.00411161	-1.00018	0.317485	0.549456	-8.8758
4930539E08RIK	0.423416	0.285733	6.14791	1.16652e-09	5.77865e-09	9.16474
4930539J05RIK	0.516912	0.415441	9.83617	8.82106e-22	6.60565e-21	36.6775
4930539M17RIK	0.00501496	0.00250748	1.00018	0.317486	0.549456	-8.87581
4930539N22RIK	0.215278	1.21518	1.68071	0.0931572	0.228998	-7.96456
4930540M03RIK	0	0	0	1	1	-9.37622
4930542C21RIK	0	0	0	1	1	-9.37622
4930542D17RIK	-0.0161111	0.00805554	-1.00018	0.317484	0.549456	-8.8758
4930542M03RIK	0	0	0	1	1	-9.37622
4930542N06RIK	0.0100039	0.0257038	0.536622	0.591658	0.912012	-9.23212
4930543D07RIK	0.0840458	0.0813708	2.69146	0.00724254	0.0226127	-5.76472
4930543E12RIK	0	0	0	1	1	-9.37622
4930543I03RIK	0	0	0	1	1	-9.37622
4930543N07RIK	0	0	0	1	1	-9.37622
4930544D05RIK	0	0	0	1	1	-9.37622
4930544G11RIK	0	0	0	1	1	-9.37622
4930544M13RIK	0	0	0	1	1	-9.37622
4930545E07RIK	0	0	0	1	1	-9.37622
4930545H06RIK	0.00144676	0.0125148	0.0960231	0.923523	1	-9.37161
4930545L08RIK	-0.013769	0.00688449	-1.00018	0.317484	0.549456	-8.8758
4930545L23RIK	0.29467	0.704823	2.77571	0.00561938	0.0178016	-5.53603
4930546C10RIK	0.00342325	0.00171162	1.00017	0.317489	0.549456	-8.87581
4930546K05RIK	0.0346482	0.069701	0.944974	0.344919	0.589335	-8.9295
4930547E08RIK	-0.0240803	0.0460761	-0.876604	0.38093	0.640905	-8.99177
4930547E14RIK	0.0397487	0.260733	0.672984	0.501126	0.801096	-9.14959
4930547H16RIK	0	0	0	1	1	-9.37622
4930548G14RIK	0	0	0	1	1	-9.37622
4930548H24RIK	0.0279867	0.0139933	1.57532	0.115526	0.274536	-8.13582
4930548J01RIK	0	0	0	1	1	-9.37622
4930548K13RIK	0.00342325	0.00171162	1.00017	0.317489	0.549456	-8.87581
4930549C01RIK	0.00917479	0.00458739	1.00018	0.317485	0.549456	-8.8758
4930549C15RIK	0.20554	1.14117	1.28491	0.199147	0.423191	-8.55063
4930549G23RIK	1.06728	1.12525	10.4008	4.90379e-24	3.9308e-23	41.8257
4930550C14RIK	0.591462	1.14736	4.09792	4.53486e-05	0.000176059	-1.04668
4930550C17RIK	0	0	0	1	1	-9.37622
4930552N02RIK	0	0	0	1	1	-9.37622
4930552P12RIK	-0.0125173	0.144642	-0.220562	0.825482	1	-9.35187
4930553C11RIK	0.00215983	0.00450316	0.407732	0.683565	1	-9.29302
4930553E22RIK	0	0	0	1	1	-9.37622
4930553J12RIK	0	0	0	1	1	-9.37622
4930553P18RIK	0.484567	0.441994	5.14653	3.2414e-07	1.42728e-06	3.69415
4930554C24RIK	0.00501496	0.00250748	1.00018	0.317486	0.549456	-8.87581
4930554G24RIK	0	0	0	1	1	-9.37622
4930554H23RIK	-0.00531195	0.00823905	-0.433982	0.664402	0.997494	-9.28196
4930554I06RIK	0	0	0	1	1	-9.37622
4930555A03RIK	0	0	0	1	1	-9.37622
4930555B11RIK	0.0130548	0.00652742	1.00018	0.317484	0.549456	-8.8758
4930555G01RIK	-0.00558307	0.00279154	-1.38093	0.167635	0.367916	-8.42276
4930555G21RIK	0	0	0	1	1	-9.37622
4930555K05RIK	0	0	0	1	1	-9.37622
4930555M17RIK	0	0	0	1	1	-9.37622
4930556C24RIK	0	0	0	1	1	-9.37622
4930556G01RIK	0.0060634	0.0030317	1.00018	0.317486	0.549456	-8.87581
4930556J02RIK	0	0	0	1	1	-9.37622
4930556L07RIK	0	0	0	1	1	-9.37622
4930556M19RIK	-0.00758469	0.0203328	-0.441582	0.658895	0.990997	-9.27863
4930556N09RIK	0	0	0	1	1	-9.37622
4930556N13RIK	0.0104321	0.0154858	0.639893	0.522401	0.828515	-9.17133
4930557F10RIK	0	0	0	1	1	-9.37622
4930557J02RIK	0.011987	0.0285147	0.688175	0.491515	0.788734	-9.13925
4930557K07RIK	-0.0365977	0.187917	-0.802445	0.422502	0.698098	-9.05405
4930558C23RIK	0	0	0	1	1	-9.37622
4930558F17RIK	0	0	0	1	1	-9.37622
4930558J18RIK	-0.0296155	0.0148078	-1.3536	0.176194	0.383137	-8.46008
4930558K02RIK	-0.0541536	0.258232	-0.739537	0.459769	0.746893	-9.10257
4930559C10RIK	0	0	0	1	1	-9.37622
4930562C15RIK	0.0312367	0.126278	0.675988	0.499217	0.798348	-9.14757
4930562F07RIK	0	0	0	1	1	-9.37622
4930562F17RIK	-0.00215983	0.00107991	-1.00016	0.317497	0.549456	-8.87583
4930563D23RIK	0	0	0	1	1	-9.37622
4930563E18RIK	0.0243612	0.041325	0.787169	0.431385	0.710349	-9.06619
4930563E22RIK	0.62471	1.32572	3.8006	0.0001538	0.000574586	-2.20255
4930563F08RIK	-0.103836	0.835753	-0.931011	0.352091	0.59942	-8.94259
4930563H07RIK	0	0	0	1	1	-9.37622
4930563I02RIK	0.0719112	0.0733843	1.83466	0.0668779	0.172569	-7.6946
4930563M20RIK	0	0	0	1	1	-9.37622
4930564B18RIK	0	0	0	1	1	-9.37622
4930564C03RIK	0	0	0	1	1	-9.37622
4930564D02RIK	0	0	0	1	1	-9.37622
4930565D16RIK	0	0	0	1	1	-9.37622
4930565N06RIK	0.0458865	0.125072	0.988769	0.323035	0.557683	-8.88715
4930567H12RIK	0.00647948	0.00323974	1.00018	0.317485	0.549456	-8.87581
4930567J20RIK	0	0	0	1	1	-9.37622
4930567K12RIK	0.000583257	1.34651	0.00384802	0.996931	1	-9.37621
4930567K20RIK	-0.0432549	0.0833925	-1.31324	0.189428	0.405554	-8.51385
4930568A12RIK	0.00581667	0.0586169	0.184463	0.853691	1	-9.35919
4930568D16RIK	0	0	0	1	1	-9.37622
4930568E12RIK	0	0	0	1	1	-9.37622
4930568G15RIK	0.0292133	0.0324615	1.19875	0.230934	0.477758	-8.65756
4930570E03RIK	0.00501496	0.00250748	1.00018	0.317486	0.549456	-8.87581
4930570G05RIK	0.00399161	0.0710829	0.125917	0.899825	1	-9.36828
4930570G19RIK	0.743688	1.94244	4.28527	2.0165e-05	8.03138e-05	-0.275298
4930571K23RIK	0	0	0	1	1	-9.37622
4930571O06RIK	-0.00431965	0.00215983	-1.00018	0.317487	0.549456	-8.87581
4930572G02RIK	0.0882158	0.228607	1.22024	0.222686	0.463917	-8.63158
4930572J10RIK	0.00485514	0.00674722	0.478858	0.632153	0.960162	-9.26147
4930572K03RIK	0	0	0	1	1	-9.37622
4930572O03RIK	0	0	0	1	1	-9.37622
4930572O13RIK	0.00342325	0.00171162	1.00017	0.317489	0.549456	-8.87581
4930573C15RIK	0	0	0	1	1	-9.37622
4930573H18RIK	0	0	0	1	1	-9.37622
4930573O16RIK	-0.00137674	0.0131179	-0.104271	0.916977	1	-9.37078
4930577N17RIK	0.407095	0.468815	5.42593	7.36615e-08	3.35503e-07	5.12921
4930578E11RIK	-9.36751e-17	0.00215983	-3.06735e-14	1	1	-9.37622
4930578I06RIK	0.00647948	0.00323974	1.73611	0.0828771	0.207863	-7.87011
4930578M01RIK	0.0659231	0.545084	0.75745	0.448973	0.733388	-9.08915
4930578N18RIK	0.00558307	0.00279154	1.00018	0.317486	0.549456	-8.87581
4930579C12RIK	0	0	0	1	1	-9.37622
4930579D09RIK	0.00215983	0.00107991	1.00016	0.317497	0.549456	-8.87583
4930579F01RIK	0.0110784	0.00553918	1.00018	0.317484	0.549456	-8.8758
4930579G18RIK	0.161808	0.943859	1.74373	0.0815378	0.205708	-7.85687
4930579G24RIK	0.316147	0.315611	4.11045	4.2999e-05	0.000167246	-0.99614
4930579H20RIK	0.0003283	0.0120256	0.0260187	0.979248	1	-9.37588
4930579J19RIK	0	0	0	1	1	-9.37622
4930579K19RIK	0.345641	0.486578	3.59636	0.000339794	0.00123325	-2.94765
4930579P08RIK	0	0	0	1	1	-9.37622
4930581F22RIK	0.0351366	0.233755	0.583942	0.559402	0.875529	-9.20559
4930583I09RIK	-0.00595008	0.00729469	-0.534157	0.593361	0.913766	-9.23344
4930583K01RIK	0.0516804	0.0258402	2.58445	0.00990579	0.0303304	-6.04518
4930583P06RIK	0.054716	0.0369896	2.12733	0.0336568	0.0935101	-7.11669
4930584F24RIK	0	0	0	1	1	-9.37622
4930586N03RIK	0.134006	0.267722	2.54004	0.0112468	0.034086	-6.15828
4930587E11RIK	-0.0167013	0.806745	-0.137602	0.890585	1	-9.36674
4930588J15RIK	0.0825376	0.139139	1.62824	0.103815	0.250318	-8.0512
4930588K23RIK	0.0254844	0.0127422	1.5346	0.125224	0.294171	-8.19903
4930589L23RIK	-0.00701496	0.00782714	-0.578428	0.563116	0.878138	-9.20879
4930590J08RIK	-0.0211092	0.402137	-0.242335	0.808574	1	-9.34683
4930590L14RIK	0	0	0	1	1	-9.37622
4930590L20RIK	0.020763	0.497919	0.25419	0.799405	1	-9.34388
4930591A17RIK	0.00717479	0.0035874	1.00018	0.317485	0.549456	-8.87581
4930591E09RIK	0	0	0	1	1	-9.37622
4930592A05RIK	0.00936702	0.0415448	0.348446	0.727585	1	-9.31546
4930592I03RIK	-0.0105077	0.0113173	-0.666047	0.505547	0.806598	-9.15424
4930593A02RIK	0.182527	0.191355	3.73127	0.000202137	0.000746735	-2.45995
4930593C16RIK	0.0060634	0.0030317	1.00018	0.317486	0.549456	-8.87581
4930594C11RIK	0.0848105	0.506768	0.907121	0.364579	0.617228	-8.96455
4930594M22RIK	0.212259	0.301659	3.94754	8.49487e-05	0.000323637	-1.64182
4930594O21RIK	0	0	0	1	1	-9.37622
4930595D18RIK	-0.0330083	0.0833045	-0.948231	0.34326	0.587074	-8.92641
4930595L18RIK	-0.0127021	0.0214208	-0.564666	0.572438	0.889041	-9.21666
4930596D02RIK	0	0	0	1	1	-9.37622
4930596I21RIK	-0.0946453	0.207284	-1.64266	0.100793	0.24459	-8.02766
4930597A21RIK	0.0156747	0.00783735	1.55949	0.119222	0.281948	-8.16058
4930597G03RIK	0	0	0	1	1	-9.37622
4930598F16RIK	0	0	0	1	1	-9.37622
4930599N23RIK	1.03192	1.56154	8.81624	5.7923e-18	3.86488e-17	27.9767
4931402G19RIK	0.0923854	0.294547	1.3376	0.181356	0.391585	-8.48159
4931403E22RIK	0.0840646	0.150267	1.97553	0.048505	0.130058	-7.427
4931403G20RIK	0.132062	0.68985	1.4703	0.14182	0.327732	-8.29549
4931403M11RIK	0	0	0	1	1	-9.37622
4931406B18RIK	0.024163	0.0282626	1.07421	0.28301	0.549456	-8.79904
4931406C07RIK	-0.42309	2.48981	-3.7236	0.000208285	0.000768839	-2.48814
4931406H21RIK	-0.0648335	0.174146	-1.00903	0.313222	0.549456	-8.86691
4931406P16RIK	0.719438	3.2587	3.65225	0.000274555	0.00100384	-2.74772
4931408C20RIK	0	0	0	1	1	-9.37622
4931408D14RIK	0.067951	0.131661	1.29783	0.194669	0.415144	-8.53395
4931409K22RIK	0.0395985	0.0248142	1.7318	0.0836421	0.209382	-7.87756
4931412M21	0.00571027	0.00717479	0.688308	0.491432	0.78866	-9.13916
4931413K12RIK	0.124601	0.321061	1.50917	0.131598	0.307204	-8.23768
4931414P19RIK	0.507762	0.48435	5.52601	4.26077e-08	1.96406e-07	5.66055
4931417E11RIK	0	0	0	1	1	-9.37622
4931419H13RIK	0.0142224	0.00711119	1.79602	0.0728179	0.186022	-7.76456
4931420L22RIK	0.00215983	0.00107991	1.00016	0.317497	0.549456	-8.87583
4931422A03RIK	0.588508	0.78985	8.16209	1.07181e-15	6.64098e-15	22.8204
4931423N10RIK	0.164322	0.277733	2.17334	0.0300083	0.0842765	-7.01816
4931428F04RIK	2.26854	2.59265	13.8281	1.145e-39	1.43434e-38	77.6126
4931428L18RIK	0.00717479	0.0035874	1.00018	0.317485	0.549456	-8.87581
4931429I11RIK	0.0077429	0.00387145	1.69138	0.0911007	0.224547	-7.9466
4931429L15RIK	-0.0403208	0.056666	-1.30897	0.190868	0.40822	-8.51944
4931429P17RIK	-9.36751e-17	0.00215983	-3.06735e-14	1	1	-9.37622
4931430N09RIK	0.225962	0.600152	2.07465	0.0382953	0.105043	-7.22696
4931431B13RIK	-0.00571027	0.00717479	-0.522986	0.601109	0.92289	-9.23934
4931431C16RIK	0.138522	0.392314	1.86254	0.0628437	0.163292	-7.64318
4931431F19RIK	0.00342325	0.00171162	1.00017	0.317489	0.549456	-8.87581
4931439C15RIK	0.0614956	0.0718859	1.56033	0.119024	0.281528	-8.15928
4931440F15RIK	-0.0043349	0.761691	-0.0347303	0.972302	1	-9.37562
4931440J10RIK	-0.0379403	0.302489	-0.705456	0.480704	0.774671	-9.1272
4931440P22RIK	0.0534044	0.799998	0.562079	0.574198	0.891346	-9.21812
4932411E22RIK	0.0325822	0.0162911	1.71221	0.0871931	0.21667	-7.91123
4932412D23RIK	0.00819259	0.0224802	0.320964	0.748311	1	-9.32466
4932413F04RIK	0.296341	0.399612	3.36416	0.000799339	0.00280256	-3.74611
4932414J04RIK	0	0	0	1	1	-9.37622
4932414N04RIK	0	0	0	1	1	-9.37622
4932415M13RIK	0	0	0	1	1	-9.37622
4932416H05RIK	0.922228	0.850856	7.97534	4.47264e-15	2.71245e-14	21.4114
4932416K20RIK	-0.00215983	0.00107991	-1.00016	0.317497	0.549456	-8.87583
4932418E24RIK	-0.0127579	0.0113939	-0.690979	0.489752	0.786559	-9.13731
4932431P20RIK	0.00342325	0.00171162	1.00017	0.317489	0.549456	-8.87581
4932435O22RIK	0.0358211	0.0403282	1.48464	0.13798	0.320073	-8.27434
4932438A13RIK	0.0351727	7.32503	0.277952	0.781111	1	-9.33755
4932438H23RIK	0.020417	0.0485742	0.633978	0.526252	0.833543	-9.1751
4932441J04RIK	0.118032	0.151695	2.82392	0.00484604	0.015499	-5.40205
4932443I19RIK	-0.00996698	0.00714332	-1.12849	0.259407	0.525754	-8.73927
4932443L11RIK	-0.0753896	0.677008	-0.696635	0.486207	0.782068	-9.13339
4932702P03RIK	0.370063	0.365638	5.60363	2.76976e-08	1.28792e-07	6.07894
4933400B14RIK	0.0096316	0.0048158	1.00018	0.317485	0.549456	-8.8758
4933400C23RIK	0.00342325	0.00171162	1.00017	0.317489	0.549456	-8.87581
4933400F21RIK	-0.134294	0.425381	-1.48189	0.138711	0.321556	-8.27842
4933400L20RIK	0	0	0	1	1	-9.37622
4933401D09RIK	0.00215983	0.00107991	1.00016	0.317497	0.549456	-8.87583
4933401H06RIK	-0.00747177	0.00373589	-1.00018	0.317485	0.549456	-8.8758
4933402C05RIK	0	0	0	1	1	-9.37622
4933402C06RIK	0.0161811	0.00809055	1.40698	0.159769	0.356721	-8.38648
4933402D24RIK	0.0660043	0.0564653	2.00168	0.0456105	0.12298	-7.37516
4933402J07RIK	0	0	0	1	1	-9.37622
4933402J10RIK	0	0	0	1	1	-9.37622
4933402J15RIK	0.00215983	0.00450316	0.407732	0.683565	1	-9.29302
4933402N03RIK	0	0	0	1	1	-9.37622
4933402N22RIK	0	0	0	1	1	-9.37622
4933402P03RIK	0	0	0	1	1	-9.37622
4933404G15RIK	0	0	0	1	1	-9.37622
4933404K08RIK	0.00977011	0.00488506	1.00018	0.317485	0.549456	-8.8758
4933404K13RIK	0	0	0	1	1	-9.37622
4933404O12RIK	1.14377	0.932266	9.47419	2.18144e-20	1.5636e-19	33.4996
4933405D12RIK	0.0194511	0.0433125	0.787174	0.431382	0.710349	-9.06619
4933405E24RIK	0	0	0	1	1	-9.37622
4933405L10RIK	0.028733	0.068212	0.750206	0.453322	0.739313	-9.09462
4933406B17RIK	-0.00714212	0.0394438	-0.231753	0.816781	1	-9.34934
4933406C10RIK	0.115399	0.211371	1.92484	0.0545558	0.144156	-7.52555
4933406D12RIK	0	0	0	1	1	-9.37622
4933406F09RIK	0	0	0	1	1	-9.37622
4933406G16RIK	0	0	0	1	1	-9.37622
4933406I18RIK	0.174798	0.673434	1.74358	0.0815653	0.205755	-7.85715
4933406J08RIK	0	0	0	1	1	-9.37622
4933406J10RIK	0.011055	0.062289	0.325108	0.745173	1	-9.32332
4933406K04RIK	0	0	0	1	1	-9.37622
4933406M09RIK	0.0146466	0.00732328	1.00018	0.317484	0.549456	-8.8758
4933407E24RIK	-0.014853	0.0685413	-0.407585	0.683673	1	-9.29308
4933407G14RIK	0	0	0	1	1	-9.37622
4933407I05RIK	0.0401121	0.0929528	1.13358	0.257265	0.522276	-8.73352
4933407I08RIK	-0.565622	1.28211	-4.16592	3.39158e-05	0.000132913	-0.770541
4933407L21RIK	0.414792	0.564501	4.0115	6.5207e-05	0.000250447	-1.39131
4933408B17RIK	0.0144333	0.324766	0.18812	0.850824	1	-9.35851
4933408J17RIK	2.38595	1.79845	32.65	4.02936e-156	1.34322e-153	345.45
4933408N05RIK	0.0339356	0.108858	0.794242	0.427258	0.704626	-9.0606
4933409F18RIK	-0.00215983	0.00107991	-1.00016	0.317497	0.549456	-8.87583
4933409G03RIK	0	0	0	1	1	-9.37622
4933411E08RIK	0.00747177	0.00373589	1.00018	0.317485	0.549456	-8.8758
4933411G06RIK	0	0	0	1	1	-9.37622
4933411G11RIK	0	0	0	1	1	-9.37622
4933411K16RIK	0	0	0	1	1	-9.37622
4933412E12RIK	1.14883	0.736428	10.8764	5.19886e-26	4.42667e-25	46.3379
4933412E24RIK	0	0	0	1	1	-9.37622
4933412O06RIK	0.328842	0.2872	4.93372	9.56574e-07	4.11965e-06	2.6492
4933413G19RIK	-0.0107501	0.00969469	-0.967271	0.333662	0.57339	-8.90818
4933413J09RIK	-0.0213469	0.0923659	-0.447822	0.654387	0.985849	-9.27586
4933413L06RIK	-0.533355	1.0621	-5.08573	4.4338e-07	1.94195e-06	3.39138
4933414I15RIK	0	0	0	1	1	-9.37622
4933415F23RIK	0	0	0	1	1	-9.37622
4933416C03RIK	0.0301635	0.0607305	0.878934	0.379665	0.639136	-8.98973
4933416E03RIK	0	0	0	1	1	-9.37622
4933416M06RIK	0.0120626	0.00603128	1.41209	0.158259	0.35471	-8.37929
4933416M07RIK	0.0132382	0.0066191	1.376	0.169155	0.37038	-8.42954
4933416O17RIK	0	0	0	1	1	-9.37622
4933417A18RIK	0.00215983	0.00107991	1.00016	0.317497	0.549456	-8.87583
4933417D19RIK	0.425718	0.596651	5.46451	5.97095e-08	2.73379e-07	5.33296
4933417E11RIK	0	0	0	1	1	-9.37622
4933417G07RIK	0.00878426	0.0160386	0.606131	0.544577	0.856378	-9.19237
4933417O13RIK	0	0	0	1	1	-9.37622
4933421I07RIK	0	0	0	1	1	-9.37622
4933421O10RIK	0.878697	1.31908	6.46435	1.64474e-10	8.43308e-10	11.0798
4933422A05RIK	-0.0457055	0.0228527	-1.73158	0.0836824	0.209433	-7.87795
4933424G05RIK	-0.00807554	0.164844	-0.129975	0.896615	1	-9.36777
4933424G06RIK	0.0830669	0.572975	0.946319	0.344233	0.588451	-8.92822
4933424M12RIK	-0.0175017	0.00875085	-1.00018	0.317484	0.549456	-8.8758
4933425B07RIK	0.00215983	0.00107991	1.00016	0.317497	0.549456	-8.87583
4933425L06RIK	0	0	0	1	1	-9.37622
4933427D06RIK	-0.00581835	0.0138972	-0.289817	0.772022	1	-9.33418
4933427D14RIK	0.114212	5.20298	0.589034	0.555982	0.871053	-9.2026
4933427E11RIK	0.0474593	0.0553579	1.91416	0.0559081	0.14734	-7.54599
4933427E13RIK	0.00080863	0.0149937	0.0579444	0.953805	1	-9.37454
4933427G17RIK	0.0278243	0.016072	1.95856	0.0504643	0.134581	-7.46027
4933427G23RIK	0.0723801	0.114978	1.60077	0.10977	0.262805	-8.09547
4933427I22RIK	0	0	0	1	1	-9.37622
4933428C19RIK	0.0135096	0.0228481	0.740488	0.459192	0.746123	-9.10186
4933428G20RIK	0.029169	0.777822	0.268017	0.788746	1	-9.34027
4933429K18RIK	0	0	0	1	1	-9.37622
4933429O19RIK	0.00215983	0.00107991	1.00016	0.317497	0.549456	-8.87583
4933430H16RIK	-0.00647948	0.00539957	-0.727739	0.466958	0.756611	-9.11123
4933430I17RIK	-0.0196526	0.05398	-0.624125	0.532699	0.841765	-9.1813
4933430M04RIK	0.0653108	0.103165	1.46186	0.144119	0.332231	-8.30785
4933430N04RIK	0	0	0	1	1	-9.37622
4933431E20RIK	2.66504	3.52253	16.8617	7.98053e-56	1.56492e-54	114.695
4933431G14RIK	0.175074	0.911053	1.39241	0.164134	0.363614	-8.40686
4933431J24RIK	0.00215983	0.00107991	1.00016	0.317497	0.549456	-8.87583
4933431K23RIK	0	0	0	1	1	-9.37622
4933432G23RIK	0	0	0	1	1	-9.37622
4933432I03RIK	-0.0155274	0.0463705	-0.451587	0.651672	0.98355	-9.27416
4933432I09RIK	0.366338	0.504821	3.68683	0.000240296	0.000882886	-2.62254
4933432K03RIK	0.00990273	0.00495136	1.40457	0.160486	0.357455	-8.38987
4933433C11RIK	0.0243895	0.0121947	1.84436	0.0654506	0.16927	-7.67679
4933433F19RIK	0	0	0	1	1	-9.37622
4933433G08RIK	0	0	0	1	1	-9.37622
4933433G15RIK	-0.0542588	0.0745614	-1.31975	0.187247	0.402215	-8.50529
4933433G19RIK	0.387561	1.10927	4.08729	4.74373e-05	0.000183913	-1.08945
4933433H22RIK	0	0	0	1	1	-9.37622
4933433N18RIK	0	0	0	1	1	-9.37622
4933434E20RIK	2.10276	3.88647	12.0011	6.10987e-31	5.9877e-30	57.6159
4933436E23RIK	0.00431965	0.00215983	1.00018	0.317487	0.549456	-8.87581
4933436H12RIK	0	0	0	1	1	-9.37622
4933436I20RIK	-0.0101521	0.0162422	-0.676591	0.498835	0.797866	-9.14716
4933438A12RIK	0	0	0	1	1	-9.37622
4933438B17RIK	0	0	0	1	1	-9.37622
4933438K21RIK	0	0	0	1	1	-9.37622
4933439C10RIK	-0.475473	6.00237	-2.61067	0.00918269	0.0282606	-5.97748
4933439K11RIK	-0.0116642	0.0715214	-0.363428	0.716368	1	-9.31012
4933440J02RIK	0	0	0	1	1	-9.37622
4933440M02RIK	0	0	0	1	1	-9.37622
5031410I06RIK	-0.0207661	0.0125429	-1.47592	0.140307	0.324718	-8.28724
5031414D18RIK	-0.043172	0.26723	-0.568192	0.570042	0.886041	-9.21466
5031425E22RIK	1.06426	2.40497	6.46911	1.59599e-10	8.18617e-10	11.1093
5031425F14RIK	0.00691981	0.0321139	0.283046	0.777205	1	-9.33612
5031426D15RIK	-0.211921	6.03657	-0.941572	0.346658	0.591801	-8.93271
5031434C07RIK	-0.0168486	0.0084243	-1.00018	0.317484	0.549456	-8.8758
5031434O11RIK	0.151967	0.425697	1.71523	0.0866387	0.215483	-7.90607
5031439G07RIK	-0.363358	4.52586	-1.75814	0.0790551	0.199985	-7.83171
5033403F01RIK	0.0431569	0.0678721	1.12376	0.261407	0.529124	-8.74459
5033403H07RIK	0	0	0	1	1	-9.37622
5033404E19RIK	0	0	0	1	1	-9.37622
5033406O09RIK	0.037406	0.0297813	1.40406	0.160636	0.35777	-8.39058
5033417F24RIK	2.46026	1.99003	19.2981	5.46343e-70	1.59917e-68	147.243
5033421B08RIK	-0.014826	0.019343	-0.734503	0.462829	0.751109	-9.10628
5033426O07RIK	-0.0138063	0.00690315	-1.00018	0.317484	0.549456	-8.8758
5033428I22RIK	0	0	0	1	1	-9.37622
5033430I15RIK	0.594223	0.462664	7.14807	1.78602e-12	9.87213e-12	15.5153
5133400J02RIK	0	0	0	1	1	-9.37622
5330411J11RIK	0.00215983	0.00107991	1.00016	0.317497	0.549456	-8.87583
5330413P13RIK	0.18169	0.18499	3.15732	0.00164387	0.00556744	-4.41355
5330416C01RIK	0.107257	0.35109	1.18441	0.236555	0.487322	-8.67463
5330417C22RIK	0.578823	4.74022	3.35339	0.000830707	0.00290671	-3.78188
5330426P16RIK	0.322687	0.283233	4.57908	5.30879e-06	2.19021e-05	1.00111
5330432E05RIK	0	0	0	1	1	-9.37622
5330438D12RIK	0.0980282	2.54249	0.588854	0.556103	0.871177	-9.2027
5330439A09RIK	-0.0166849	0.0965267	-0.361226	0.718013	1	-9.31092
5330439B14RIK	0.00431965	0.00215983	1.00018	0.317487	0.549456	-8.87581
5430401F13RIK	0	0	0	1	1	-9.37622
5430401H09RIK	0	0	0	1	1	-9.37622
5430402O13RIK	0.195136	0.247575	3.38783	0.000734227	0.00258289	-3.6671
5430403N17RIK	0	0	0	1	1	-9.37622
5430405H02RIK	0.200342	2.63631	1.29993	0.193949	0.413861	-8.53123
5430416N02RIK	1.13923	1.58416	8.28231	4.21047e-16	2.6388e-15	23.7425
5430416O09RIK	0.003399	0.0134193	0.205968	0.836861	1	-9.35499
5430419D17RIK	0	0	0	1	1	-9.37622
5430421F17RIK	0.00277875	0.0203978	0.131072	0.895747	1	-9.36762
5430421N21RIK	0	0	0	1	1	-9.37622
5430425K12RIK	0	0	0	1	1	-9.37622
5430427M07RIK	-0.00485514	0.00674722	-0.478858	0.632153	0.960162	-9.26147
5430431A17RIK	0.0577815	0.378769	0.690956	0.489766	0.786559	-9.13733
5430434I15RIK	0	0	0	1	1	-9.37622
5430435G22RIK	-0.000754502	0.0180659	-0.0295305	0.976448	1	-9.37578
5430435K18RIK	0	0	0	1	1	-9.37622
5430437J10RIK	-0.00111139	0.0130986	-0.103325	0.917728	1	-9.37088
5430440P10RIK	-0.0173173	0.0158335	-1.40512	0.160321	0.357393	-8.38909
5530400C23RIK	0	0	0	1	1	-9.37622
5530401A14RIK	0.370238	0.654111	3.38823	0.000733166	0.00257959	-3.66576
5730403I07RIK	0	0	0	1	1	-9.37622
5730408K05RIK	0.368741	1.0927	3.36914	0.000785211	0.00275486	-3.72953
5730409E04RIK	4.23382	3.55483	28.5862	2.77136e-129	4.49442e-127	283.662
5730409K12RIK	1.37972	2.20616	9.07016	6.98406e-19	4.79019e-18	30.0688
5730419F03RIK	0.00215983	0.00107991	1.00016	0.317497	0.549456	-8.87583
5730420D15RIK	0.0408679	0.0855223	1.23699	0.216405	0.453236	-8.61101
5730422E09RIK	0.165857	0.701521	1.50509	0.132642	0.309163	-8.24381
5730435O14RIK	0.0183409	0.00917047	1.70472	0.0885832	0.219592	-7.924
5730455P16RIK	3.37764	4.10073	18.9027	1.24624e-67	3.41683e-66	141.823
5730457N03RIK	0	0	0	1	1	-9.37622
5730460C07RIK	0	0	0	1	1	-9.37622
5730480H06RIK	1.08825	1.75171	7.86282	1.04365e-14	6.25518e-14	20.5761
5730488B01RIK	0	0	0	1	1	-9.37622
5730507C01RIK	-0.0546826	0.0748165	-1.4371	0.151027	0.346303	-8.34369
5730508B09RIK	0.616071	1.07649	4.5779	5.33828e-06	2.2013e-05	0.995801
5730522E02RIK	-0.16657	1.98285	-1.01429	0.310711	0.549456	-8.8616
5730559C18RIK	-0.0649907	0.0636354	-1.71455	0.0867622	0.21574	-7.90722
5830403F22RIK	0.0172295	0.00861477	1.64227	0.100874	0.244703	-8.0283
5830410O09RIK	-0.00578417	0.00790705	-0.832666	0.405248	0.675006	-9.02933
5830411N06RIK	0	0	0	1	1	-9.37622
5830415F09RIK	0.532513	0.917615	4.22036	2.67976e-05	0.000105828	-0.546316
5830416I19RIK	0.0898026	0.133249	1.75177	0.0801446	0.202519	-7.84286
5830416P10RIK	-0.0814253	0.435327	-0.862211	0.388795	0.652048	-9.00429
5830417I10RIK	0.31319	3.8928	2.40955	0.0161666	0.0478438	-6.4794
5830418P13RIK	0.0248325	0.15939	0.43444	0.66407	0.997067	-9.28177
5830428H23RIK	-0.327284	6.13445	-1.8162	0.0696634	0.178855	-7.7282
5830428M24RIK	0	0	0	1	1	-9.37622
5830432E09RIK	0.234709	0.902191	2.47127	0.0136428	0.0408789	-6.32961
5830433I10RIK	0.0138365	1.15653	0.131546	0.895372	1	-9.36756
5830444B04RIK	0.403177	0.923225	3.56277	0.000385709	0.00139195	-3.06635
5830454E08RIK	0.25188	0.486081	2.53898	0.0112805	0.0341758	-6.16094
5830473C10RIK	0.0343256	0.0417717	1.2015	0.229866	0.475946	-8.65425
5930403L14RIK	-0.00342325	0.00171162	-1.00017	0.317489	0.549456	-8.87581
5930412G12RIK	0.293551	0.283947	3.79152	0.000159445	0.000594879	-2.23653
5930430L01RIK	0.198988	0.752468	1.58024	0.114395	0.272342	-8.12807
5930438M14RIK	0.255406	0.179999	4.22859	2.58536e-05	0.000102234	-0.512157
6030407O03RIK	0.0389983	0.0325064	1.56331	0.118321	0.280165	-8.15463
6030408B16RIK	0.0134586	0.0164994	0.910744	0.362668	0.614586	-8.96126
6030419C18RIK	1.27056	1.50674	12.1193	1.76806e-31	1.75898e-30	58.8488
6030426L16RIK	-0.00431965	0.00431965	-1.0018	0.316701	0.549456	-8.87418
6030440G07RIK	-0.00558307	0.00279154	-1.38093	0.167635	0.367916	-8.42276
6030442E23RIK	0	0	0	1	1	-9.37622
6030443J06RIK	0.197471	0.294107	3.25794	0.00116316	0.00400921	-4.09405
6030458C11RIK	1.96682	3.8763	10.3039	1.21504e-23	9.61843e-23	40.9257
6030466F02RIK	0	0	0	1	1	-9.37622
6030468B19RIK	0	0	0	1	1	-9.37622
6030469F06RIK	0	0	0	1	1	-9.37622
6230400D17RIK	1.13516	1.66845	10.2366	2.27115e-23	1.78309e-22	40.3053
6330403A02RIK	1.52981	1.77371	9.13369	4.08266e-19	2.81953e-18	30.6
6330403K07RIK	3.32846	5.57802	17.0403	7.86599e-57	1.59457e-55	117.006
6330407A03RIK	-0.0134944	0.00674722	-1.33206	0.183169	0.394668	-8.48898
6330408A02RIK	1.10835	1.0367	8.90581	2.76197e-18	1.86333e-17	28.7089
6330409D20RIK	0.477665	0.309666	7.38451	3.41368e-13	1.93632e-12	17.142
6330410L21RIK	-0.0100299	0.00501496	-1.00018	0.317485	0.549456	-8.8758
6330415B21RIK	-0.499896	2.76446	-2.42391	0.0155456	0.0461456	-6.4449
6330415G19RIK	0.419511	0.79544	3.75499	0.000184185	0.000682819	-2.37241
6330416G13RIK	1.97552	2.25891	10.9562	2.3871e-26	2.05335e-25	47.1107
6330418K02RIK	0.585351	0.59635	6.1887	9.10571e-10	4.52838e-09	9.40665
6330420H09RIK	-0.00882821	0.00441411	-1.00018	0.317485	0.549456	-8.8758
6330549D23RIK	0.0591474	0.724199	0.513455	0.607756	0.93078	-9.24429
6430411K18RIK	-0.00689001	1.45143	-0.0418307	0.966643	1	-9.37534
6430503K07RIK	-0.0263212	0.0131606	-1.52741	0.127002	0.297699	-8.21003
6430531B16RIK	0.070303	0.100733	1.6444	0.100434	0.243817	-8.0248
6430548M08RIK	2.94347	4.87762	14.8179	9.92187e-45	1.43311e-43	89.2244
6430550D23RIK	0.0873879	0.35022	1.12026	0.262893	0.531468	-8.74852
6430553K19RIK	0	0	0	1	1	-9.37622
6430562O15RIK	1.13584	1.26268	8.9827	1.45534e-18	9.9106e-18	29.3426
6430571L13RIK	0.550553	0.453456	6.57304	8.22839e-11	4.28062e-10	11.7579
6430573F11RIK	0.536587	1.63925	3.16443	0.00160465	0.00544032	-4.39129
6430584L05RIK	0.678511	0.573851	6.28481	5.05111e-10	2.53782e-09	9.98244
6430590A07RIK	-1.09395	2.25313	-8.43496	1.26473e-16	8.07206e-16	24.9299
6430590A10RIK	0.0317683	0.180322	0.52313	0.601009	0.92289	-9.23927
6430628N08RIK	0	0	0	1	1	-9.37622
6430710C18RIK	0.010598	0.00529902	1.41396	0.157709	0.354291	-8.37664
6530402F18RIK	0.280391	0.260841	4.31523	1.76614e-05	7.06372e-05	-0.148833
6530403H02RIK	0.00411855	0.00853876	0.512262	0.60859	0.931888	-9.2449
6530411M01RIK	0.249922	0.164938	4.69325	3.09541e-06	1.2955e-05	1.5189
6720432D03RIK	0.00215983	0.00107991	1.00016	0.317497	0.549456	-8.87583
6720468P15RIK	0.108678	0.0840086	2.57059	0.010308	0.0314726	-6.08068
6720483E21RIK	0.0469683	0.210778	0.674157	0.50038	0.799995	-9.1488
6720489N17RIK	0.278864	0.43547	2.80457	0.00514401	0.0163871	-5.45609
6820408C15RIK	0.178018	0.222699	2.75051	0.00606645	0.0191327	-5.60515
6820426E19RIK	0.00647948	0.00323974	1.00018	0.317485	0.549456	-8.87581
6820431F20RIK	-0.349516	2.27333	-3.48364	0.000517858	0.00184884	-3.34175
7420426K07RIK	0	0	0	1	1	-9.37622
7420461P10RIK	0.00215983	0.00107991	1.00016	0.317497	0.549456	-8.87583
7420700N18RIK	0	0	0	1	1	-9.37622
7420701I03RIK	-0.0173338	0.0190499	-0.833714	0.404658	0.674258	-9.02846
7530416G11RIK	0.0445138	0.0374716	1.72026	0.0857192	0.213551	-7.89744
7530428D23RIK	-0.010988	0.00765385	-0.964023	0.335286	0.57564	-8.91131
7630403G23RIK	-0.0112515	0.00562576	-1.00018	0.317484	0.549456	-8.8758
8030411F24RIK	0	0	0	1	1	-9.37622
8030423F21RIK	0.0131479	0.00657393	1.40919	0.159115	0.355981	-8.38337
8030423J24RIK	0.00342325	0.00171162	1.00017	0.317489	0.549456	-8.87581
8030442B05RIK	-0.00917479	0.00458739	-1.00018	0.317485	0.549456	-8.8758
8030443G20RIK	0.316338	0.222932	5.28527	1.56649e-07	7.02363e-07	4.39785
8030451A03RIK	0.0368339	0.0184169	2.3544	0.0187611	0.0548725	-6.61011
8030451O07RIK	-0.177575	0.309861	-2.0864	0.0372163	0.102337	-7.20261
8030453O22RIK	0.104431	0.46424	1.13342	0.25733	0.522332	-8.73369
8030455M16RIK	-0.00695981	0.00906298	-0.507022	0.61226	0.936144	-9.24757
8030462N17RIK	1.48642	2.28015	10.0813	9.51679e-23	7.33726e-22	38.8846
8430415O14RIK	0.0969693	0.308255	1.2728	0.203409	0.430526	-8.5661
8430419K02RIK	0	0	0	1	1	-9.37622
8430419L09RIK	2.10976	6.48636	12.2151	6.43079e-32	6.46512e-31	59.8545
8430422H06RIK	0	0	0	1	1	-9.37622
8430423G03RIK	-0.023494	0.0263936	-1.20217	0.229607	0.475505	-8.65345
8430426J06RIK	0.0435315	0.0520903	1.36174	0.173612	0.378366	-8.44905
8430429K09RIK	0.983288	1.72612	6.42991	2.04412e-10	1.0435e-09	10.8671
8430430B14RIK	0	0	0	1	1	-9.37622
8430431K14RIK	0.203784	0.267815	2.73917	0.00627797	0.0197523	-5.63606
8430436N08RIK	0.0313453	0.0398193	1.13692	0.255865	0.520013	-8.72972
8430437L04RIK	0	0	0	1	1	-9.37622
9030025P20RIK	-0.0350988	0.637055	-0.402829	0.687167	1	-9.29501
9030204H09RIK	0.0845372	0.285806	1.1386	0.255165	0.519074	-8.72781
9030404E10RIK	0.0154858	0.0138063	1.19285	0.233236	0.481408	-8.66461
9030612E09RIK	0.301844	0.516989	2.98638	0.00289746	0.00954527	-4.93387
9030616G12RIK	0	0	0	1	1	-9.37622
9030619P08RIK	0	0	0	1	1	-9.37622
9030622O22RIK	0.0121584	0.00823905	1.17482	0.240371	0.494018	-8.68594
9030624G23RIK	0.0597515	0.106568	1.59037	0.112093	0.26753	-8.11203
9030624J02RIK	1.6324	3.31688	8.81128	6.03349e-18	4.02389e-17	27.9363
9030625G05RIK	-0.00342325	0.00387145	-0.746855	0.455341	0.74099	-9.09713
9130001E16RIK	0	0	0	1	1	-9.37622
9130008F23RIK	0.029306	0.014653	1.69014	0.0913378	0.225039	-7.94869
9130011E15RIK	0.662154	2.21645	3.89251	0.000106341	0.000402184	-1.85424
9130015A21RIK	0.00215983	0.00107991	1.00016	0.317497	0.549456	-8.87583
9130015L21RIK	0	0	0	1	1	-9.37622
9130019O22RIK	0.271446	0.360218	3.31355	0.000956964	0.00332743	-3.91324
9130019P16RIK	1.18311	1.88224	7.64655	5.16916e-14	3.0286e-13	18.9998
9130023H24RIK	0.241548	0.217255	4.04409	5.69077e-05	0.000219333	-1.26221
9130024F11RIK	1.85084	3.32955	10.2802	1.51546e-23	1.1965e-22	40.7065
9130204L05RIK	0	0	0	1	1	-9.37622
9130208D14RIK	-0.0175901	0.0543816	-0.540226	0.589171	0.908712	-9.23017
9130209A04RIK	-0.0144718	0.0072359	-1.00018	0.317484	0.549456	-8.8758
9130221F21RIK	0.00468666	0.00882281	0.542892	0.587335	0.906512	-9.22873
9130221H12RIK	1.82718	2.30493	13.5556	2.59073e-38	3.12876e-37	74.5067
9130227L01RIK	0.0324626	0.131791	0.604738	0.545502	0.857672	-9.19322
9130230L23RIK	0.00558307	0.00279154	1.00018	0.317486	0.549456	-8.87581
9130401M01RIK	3.50257	3.14542	22.4993	9.59525e-90	4.98799e-88	192.673
9130409I23RIK	0.00815898	0.0101429	0.965442	0.334576	0.574579	-8.90994
9130409J20RIK	0	0	0	1	1	-9.37622
9230009I02RIK	0.00342325	0.00171162	1.00017	0.317489	0.549456	-8.87581
9230019H11RIK	0	0	0	1	1	-9.37622
9230020A06RIK	0	0	0	1	1	-9.37622
9230102K24RIK	0.0367977	0.0565596	1.08957	0.276188	0.549456	-8.78242
9230102O04RIK	0	0	0	1	1	-9.37622
9230104L09RIK	0	0	0	1	1	-9.37622
9230105E05RIK	-9.36751e-17	0.00215983	-3.06735e-14	1	1	-9.37622
9230110C19RIK	0.85039	1.32127	6.09878	1.5691e-09	7.72922e-09	8.8753
9230110F15RIK	-0.0107991	0.0174621	-0.590515	0.55499	0.869725	-9.20172
9230112D13RIK	0	0	0	1	1	-9.37622
9230112J17RIK	-0.0785993	0.368546	-0.855953	0.392246	0.657212	-9.00967
9230113P08RIK	-0.0253902	0.0252932	-1.07108	0.284412	0.549456	-8.80239
9230114K14RIK	0.968577	0.979973	7.60956	6.77012e-14	3.94513e-13	18.7342
9230116L04RIK	-0.0109645	0.722385	-0.11576	0.907868	1	-9.36951
9230116N13RIK	0.0868049	0.225355	1.71041	0.0875258	0.217394	-7.9143
9230117E06RIK	0.0768394	0.418958	0.812253	0.416855	0.690235	-9.04613
9330020H09RIK	0.418956	1.86741	3.07507	0.00216639	0.00724198	-4.66746
9330102E08RIK	1.16837	1.20337	8.09567	1.78715e-15	1.09922e-14	22.3161
9330104G04RIK	0.266804	0.337356	3.51909	0.000454148	0.00162844	-3.21913
9330111N05RIK	0.0252219	0.0126109	2.07965	0.0378325	0.103889	-7.2166
9330117O12RIK	-0.00935532	0.0131159	-0.475146	0.634795	0.963479	-9.26324
9330133O14RIK	1.04319	1.14519	7.27429	7.42543e-13	4.16242e-12	16.3778
9330136K24RIK	0.220795	0.825199	1.79515	0.0729563	0.186319	-7.76611
9330151L19RIK	1.58459	3.11086	7.76714	2.12804e-14	1.26177e-13	19.874
9330154J02RIK	0.100263	0.348113	1.30872	0.190956	0.408325	-8.51978
9330154K18RIK	0.0866721	0.11804	1.60014	0.109909	0.263064	-8.09647
9330155M09RIK	-1.04813	3.11849	-4.76525	2.18964e-06	9.24524e-06	1.85168
9330158H04RIK	0.28411	0.352689	3.72086	0.000210525	0.000776626	-2.4982
9330159F19RIK	-0.344618	7.4496	-2.54025	0.0112401	0.0340731	-6.15775
9330159M07RIK	-0.0453641	0.485309	-0.518452	0.604267	0.926958	-9.24171
9330162012RIK	0.391405	0.708459	3.74403	0.000192285	0.000711776	-2.41292
9330162B11RIK	-0.293109	0.346431	-3.24691	0.00120862	0.00415605	-4.12953
9330175E14RIK	0	0	0	1	1	-9.37622
9330175M20RIK	0.0579865	0.0947658	1.4508	0.147176	0.338416	-8.32395
9330178D15RIK	0	0	0	1	1	-9.37622
9330179D12RIK	1.56801	1.121	11.7709	6.6659e-30	6.36915e-29	55.2404
9330182L06RIK	2.50523	4.09466	13.7906	1.76435e-39	2.19579e-38	77.182
9330182O14RIK	0	0	0	1	1	-9.37622
9330188P03RIK	0.0154924	0.0962305	0.379964	0.704059	1	-9.30397
9330198N18RIK	0.0293978	0.100366	0.637818	0.52375	0.830342	-9.17265
9330199G10RIK	-0.00896633	0.0366697	-0.301194	0.763334	1	-9.33082
9430007A20RIK	0	0	0	1	1	-9.37622
9430008C03RIK	0.413313	1.06331	2.8892	0.00395252	0.0127942	-5.21702
9430014N10RIK	0.00989462	0.0385672	0.469543	0.638792	0.968191	-9.26589
9430015G10RIK	0.383241	2.11037	2.06216	0.0394716	0.107966	-7.2527
9430018G01RIK	0.00167103	0.0300483	0.0599198	0.952232	1	-9.37442
9430019J16RIK	0	0	0	1	1	-9.37622
9430020K01RIK	1.98084	4.64453	9.30563	9.40196e-20	6.6127e-19	32.0532
9430021M05RIK	0.787978	1.17718	5.28201	1.5938e-07	7.14072e-07	4.38111
9430024E24RIK	0.00627838	0.00529902	0.975251	0.329691	0.567542	-8.90043
9430037G07RIK	0.151146	0.227071	2.50324	0.0124777	0.0375942	-6.25053
9430038I01RIK	0.642961	0.625022	6.27531	5.35615e-10	2.68819e-09	9.92513
9430041J12RIK	0.410773	1.69342	3.32472	0.000919887	0.00320355	-3.87657
9430060I03RIK	0.58777	1.50466	4.15684	3.52655e-05	0.000137971	-0.807662
9430065F17RIK	0.194645	0.491105	2.06075	0.0396061	0.108299	-7.25559
9430069I07RIK	0.000719833	0.0985935	0.0211657	0.983118	1	-9.376
9430076C15RIK	0.0145079	0.0215722	0.757868	0.448723	0.733118	-9.08884
9430078G10RIK	0.108411	0.413634	1.37578	0.169224	0.37048	-8.42985
9430078K24RIK	0.0190224	0.00951118	1.88837	0.0592888	0.155111	-7.59487
9430083A17RIK	0.611563	1.56458	3.55018	0.000404372	0.00145593	-3.11057
9430085M18RIK	0.393957	0.474065	4.05801	5.36753e-05	0.000207446	-1.20673
9430091E24RIK	0.364412	0.765428	3.21658	0.00134237	0.00459076	-4.22657
9430097D07RIK	0.121574	0.367573	1.58485	0.113341	0.270171	-8.12077
9530002B09RIK	0	0	0	1	1	-9.37622
9530003J23RIK	0.0156919	0.0248446	0.706652	0.479961	0.77371	-9.12636
9530004M14RIK	0	0	0	1	1	-9.37622
9530014B07RIK	0	0	0	1	1	-9.37622
9530020I12RIK	0.00285514	0.0035874	0.522985	0.60111	0.92289	-9.23935
9530026F06RIK	0	0	0	1	1	-9.37622
9530026P05RIK	-0.0109727	0.0110694	-0.643963	0.519759	0.825167	-9.16871
9530034E10RIK	-0.0227209	0.297453	-0.315923	0.752133	1	-9.32627
9530036M11RIK	-0.00800756	0.22039	-0.106028	0.915583	1	-9.37059
9530036O11RIK	0.0660418	0.261794	1.06086	0.28903	0.549456	-8.81328
9530047P18RIK	-0.000549765	0.0311587	-0.0241527	0.980736	1	-9.37593
9530052C20RIK	-0.305667	0.670378	-4.21294	2.76754e-05	0.000109161	-0.57701
9530052E02RIK	0.136019	1.1302	1.28037	0.200737	0.426008	-8.55645
9530053A07RIK	-0.00925682	0.0288178	-0.415027	0.678219	1	-9.29002
9530053H05RIK	-1.8735e-16	0.00431965	-4.34262e-14	1	1	-9.37622
9530057J20RIK	-0.170424	0.372037	-2.89509	0.00387977	0.0125723	-5.20013
9530059O14RIK	-0.376957	4.19508	-2.11688	0.0345369	0.0956343	-7.13879
9530062K07RIK	-0.100368	1.06249	-0.751359	0.452628	0.738405	-9.09375
9530068E07RIK	3.4991	4.08931	18.9331	8.22515e-68	2.26842e-66	142.238
9530077C05RIK	1.20722	1.84119	7.48908	1.61801e-13	9.28685e-13	17.8766
9530080O11RIK	0.256896	2.76803	1.7928	0.0733313	0.187145	-7.77031
9530082P21RIK	3.32216	5.39403	19.872	1.89868e-73	6.11582e-72	155.195
9530091C08RIK	-0.464739	5.44064	-1.85579	0.0638012	0.165514	-7.6557
9630001P10RIK	0.1353	0.15853	2.80781	0.00509303	0.0162456	-5.44708
9630002D21RIK	0.0923716	0.176232	1.51706	0.129594	0.303114	-8.22575
9630013A20RIK	-0.0467861	0.186311	-0.787366	0.43127	0.710246	-9.06604
9630013D21RIK	0	0	0	1	1	-9.37622
9630013K17RIK	-0.0396121	0.244856	-0.519555	0.603498	0.926049	-9.24113
9630015K15RIK	0.0143543	0.837557	0.111993	0.910853	1	-9.36994
9630028B13RIK	0.0757588	0.0747606	1.92078	0.0550662	0.145304	-7.53332
9630028H03RIK	0	0	0	1	1	-9.37622
9630028I04RIK	0.00342325	0.00171162	1.00017	0.317489	0.549456	-8.87581
9630033F20RIK	2.17792	1.51233	16.949	2.57678e-56	5.14169e-55	115.823
9830107B12RIK	0	0	0	1	1	-9.37622
9830132P13RIK	0.0542003	0.0335796	4.18682	3.09934e-05	0.000121722	-0.684805
9830147E19RIK	0.134807	0.688261	1.06757	0.285992	0.549456	-8.80614
9830166K06RIK	-0.00741009	0.56418	-0.0699521	0.944247	1	-9.37377
9930012K11RIK	0.146334	0.162528	2.37576	0.017716	0.0520694	-6.55984
9930014A18RIK	0.419305	0.400587	4.66287	3.57721e-06	1.4909e-05	1.37995
9930021J03RIK	1.91913	4.82128	10.3407	8.61036e-24	6.84575e-23	41.2673
9930038B18RIK	0	0	0	1	1	-9.37622
9930104L06RIK	1.29211	1.89079	7.8325	1.30909e-14	7.81381e-14	20.3527
9930111H07RIK	0	0	0	1	1	-9.37622
9930111J21RIK1	-0.0275699	0.0172082	-1.7074	0.0880841	0.218522	-7.91944
9930111J21RIK2	-0.00431965	0.00215983	-1.00018	0.317487	0.549456	-8.87581
A	0.00431965	0.00215983	1.41599	0.157117	0.353984	-8.37379
A130010J15RIK	0.695513	0.578974	6.59933	6.94849e-11	3.62421e-10	11.9234
A130030D18RIK	0	0	0	1	1	-9.37622
A130051J06RIK	0.0375707	0.161406	0.642311	0.520831	0.826587	-9.16978
A130077B15RIK	-0.00342325	0.00387145	-0.746855	0.455341	0.74099	-9.09713
A1BG	0	0	0	1	1	-9.37622
A1CF	-0.00948665	0.00474332	-1.36395	0.172917	0.377124	-8.44604
A230001M10RIK	0	0	0	1	1	-9.37622
A230006K03RIK	-0.377546	6.31217	-2.04049	0.0415852	0.11326	-7.29699
A230009B12RIK	-0.0708371	0.161307	-1.14426	0.252814	0.515307	-8.72136
A230020J21RIK	0.194138	0.308344	2.87581	0.00412246	0.0133145	-5.2553
A230028O05RIK	0	0	0	1	1	-9.37622
A230046K03RIK	1.00273	4.03753	5.04375	5.49401e-07	2.39258e-06	3.18429
A230050P20RIK	-0.153889	6.49361	-1.19114	0.233904	0.482619	-8.66664
A230051N06RIK	0.894762	1.58409	5.91118	4.77438e-09	2.29896e-08	7.78999
A230056J06RIK	0.582277	0.51762	5.8251	7.87432e-09	3.75292e-08	7.30255
A230056P14RIK	1.24122	2.25267	7.88393	8.90926e-15	5.35512e-14	20.732
A230057D06RIK	-0.677081	3.22944	-3.68364	0.000243273	0.000893432	-2.63411
A230065H16RIK	0.024314	0.0143168	1.7615	0.0784846	0.198769	-7.82581
A230070E04RIK	2.63408	4.51261	14.1151	4.1109e-41	5.36243e-40	80.926
A230072I06RIK	0.00215983	0.00323974	0.447293	0.654768	0.985849	-9.27609
A230073K19RIK	-1.11067	8.42258	-11.2309	1.58758e-27	1.41248e-26	49.8024
A230077H06RIK	-0.0984986	0.522265	-0.941834	0.346524	0.591644	-8.93246
A230083G16RIK	0.447881	0.788557	5.00817	6.58074e-07	2.85401e-06	3.01004
A230087F16RIK	0.701627	1.22487	7.14678	1.80207e-12	9.9569e-12	15.5065
A230098N10RIK	0	0	0	1	1	-9.37622
A230103J11RIK	0.576477	0.957999	5.29115	1.51843e-07	6.81467e-07	4.42803
A230103O09RIK	0.111209	0.0697613	3.30625	0.000981938	0.00341144	-3.93713
A230107N01RIK	0.249186	0.783898	1.9781	0.0482141	0.129344	-7.42194
A230108P19RIK	0.037617	0.0188085	3.04482	0.0023942	0.00796731	-4.75919
A2M	0.00948665	0.00474332	1.00018	0.317485	0.549456	-8.8758
A330008L17RIK	0.563689	0.559597	8.1064	1.64583e-15	1.01363e-14	22.3973
A330009N23RIK	2.11559	1.91493	14.8253	9.08397e-45	1.31299e-43	89.3123
A330015K06RIK	0.337799	0.453305	3.76076	0.000180048	0.000668483	-2.35102
A330023F24RIK	-1.83182	7.09302	-13.8075	1.45255e-39	1.81419e-38	77.3756
A330032B11RIK	-0.13183	0.543985	-1.60511	0.108811	0.260751	-8.08852
A330033J07RIK	0.135489	0.122625	3.55541	0.000396525	0.0014289	-3.09223
A330035P11RIK	0.0526147	0.0951961	1.17689	0.239543	0.492464	-8.68351
A330040F15RIK	0.224146	1.24707	1.54592	0.122466	0.288679	-8.18162
A330041J22RIK	0.455114	0.431115	5.82913	7.6935e-09	3.66924e-08	7.32517
A330048O09RIK	0	0	0	1	1	-9.37622
A330049N07RIK	-0.00126342	0.00279154	-0.312191	0.754966	1	-9.32744
A330050F15RIK	0.655846	0.923119	4.56322	5.71667e-06	2.35363e-05	0.930142
A330069E16RIK	0.502587	0.659477	4.82827	1.6111e-06	6.85069e-06	2.14693
A330069K06RIK	0.0121663	0.0649797	0.420619	0.674131	1	-9.28768
A330070K13RIK	0.25164	0.237052	3.81257	0.000146648	0.000548795	-2.15766
A330074K22RIK	0.068233	0.117473	1.69801	0.0898421	0.222214	-7.93539
A330076C08RIK	0.0519578	0.0294021	2.15053	0.0317718	0.0887899	-7.06726
A330076H08RIK	-1.53646	6.48625	-7.89632	8.11838e-15	4.88463e-14	20.8236
A330084C13RIK	0.250402	0.594025	2.871	0.00418513	0.0135014	-5.26901
A330093E20RIK	-0.158531	2.45191	-0.892176	0.372531	0.628621	-8.978
A330102I10RIK	-0.0736945	2.56507	-0.438752	0.660944	0.993651	-9.27988
A3GALT2	0.0292868	0.0457655	0.999375	0.317875	0.550007	-8.87661
A430005L14RIK	2.86958	2.50315	17.9965	2.61224e-62	6.14344e-61	129.594
A430010J10RIK	-0.0618589	0.148861	-1.01822	0.308838	0.549456	-8.8576
A430033K04RIK	0.786407	1.81461	4.72439	2.66652e-06	1.11991e-05	1.66223
A430035B10RIK	0.661257	0.613784	6.13061	1.29518e-09	6.40543e-09	9.06259
A430046D13RIK	1.17531	1.6949	8.4345	1.26936e-16	8.1004e-16	24.9263
A430048G15RIK	0	0	0	1	1	-9.37622
A430057M04RIK	0.580523	0.66256	7.53358	1.17442e-13	6.78063e-13	18.1919
A430060F13RIK	0	0	0	1	1	-9.37622
A430072P03RIK	0	0	0	1	1	-9.37622
A430078G23RIK	-1.28456e-15	0.00215983	-4.20625e-13	1	1	-9.37622
A430078I02RIK	0.0503144	0.104223	1.03264	0.302042	0.549456	-8.84281
A430085M09RIK	0.00215983	0.00107991	1.00016	0.317497	0.549456	-8.87583
A430088P11RIK	0.00517079	0.0751679	0.1313	0.895566	1	-9.36759
A430089I19RIK	0	0	0	1	1	-9.37622
A430090L17RIK	-0.116045	0.7751	-0.974863	0.329883	0.567756	-8.90081
A430093F15RIK	0.0830856	0.0589173	2.51896	0.0119381	0.0360486	-6.21129
A430105I19RIK	0.0430109	0.135051	0.831689	0.405799	0.67571	-9.03015
A430105J06RIK	0.094635	0.139176	1.8265	0.0680967	0.175272	-7.70948
A430108G06RIK	0.452164	0.781812	3.73483	0.000199343	0.000736864	-2.44685
A430110L20RIK	0.108914	0.281986	1.34601	0.17863	0.387532	-8.47032
A4GALT	0.0855164	0.0613002	2.78442	0.00547181	0.0173616	-5.51198
A4GNT	0.0451704	0.0247451	2.23648	0.0255584	0.0728213	-6.87953
A530001N23RIK	-0.0403727	0.0201863	-1.7307	0.0838395	0.209738	-7.87947
A530006G24RIK	0	0	0	1	1	-9.37622
A530010L16RIK	0.00215983	0.00107991	1.00016	0.317497	0.549456	-8.87583
A530013C23RIK	0.0158624	0.0190973	0.857602	0.391335	0.655784	-9.00825
A530016L24RIK	-0.00279142	0.105893	-0.0822815	0.934441	1	-9.37283
A530020G20RIK	0	0	0	1	1	-9.37622
A530021J07RIK	0.0687792	0.0613763	1.96532	0.0496767	0.132818	-7.44706
A530032D15RIK	0.0077429	0.00603128	1.40872	0.159255	0.355981	-8.38404
A530046M15RIK	0.119567	0.267184	2.11831	0.0344153	0.0953401	-7.13577
A530050N04RIK	0.0804272	0.206138	1.35578	0.175499	0.381843	-8.45713
A530053G22RIK	0	0	0	1	1	-9.37622
A530054K11RIK	1.05894	1.2411	7.26506	7.92134e-13	4.43567e-12	16.3143
A530058N18RIK	0.310593	0.632311	2.54961	0.0109447	0.0332569	-6.13406
A530064D06RIK	-0.00215983	0.00107991	-1.00016	0.317497	0.549456	-8.87583
A530065N20RIK	0.0468482	0.0839415	1.21579	0.224373	0.466907	-8.63699
A530072M11RIK	0.0234738	0.101466	0.575206	0.565292	0.88058	-9.21065
A530088E08RIK	-0.0279961	0.013998	-1.37583	0.169207	0.370476	-8.42978
A530095I07RIK	0.033805	0.0212222	1.85195	0.0643514	0.166797	-7.6628
A530099J19RIK	-0.00342325	0.00171162	-1.00017	0.317489	0.549456	-8.87581
A630001G21RIK	-0.0442392	0.0221196	-1.72622	0.0846417	0.211368	-7.88719
A630001O12RIK	0.00882821	0.00441411	1.00018	0.317485	0.549456	-8.8758
A630010A05RIK	0	0	0	1	1	-9.37622
A630019I02RIK	0.166772	0.244032	2.36972	0.0180062	0.0528558	-6.5741
A630020A06	0.0275816	0.0387694	1.15445	0.248616	0.507909	-8.70965
A630023A22RIK	0	0	0	1	1	-9.37622
A630023P12RIK	0.437342	0.586373	4.61124	4.56592e-06	1.89041e-05	1.14571
A630031M04RIK	-0.00126342	0.0105344	-0.0956846	0.923792	1	-9.37164
A630034I12RIK	0.308631	0.579147	2.72748	0.00650286	0.0204171	-5.66778
A630066F11RIK	0.689635	0.953753	6.09612	1.59435e-09	7.84991e-09	8.85972
A630072L19RIK	-0.0498616	0.170083	-0.83583	0.403467	0.672631	-9.02669
A630072M18RIK	0.918909	3.01143	6.11913	1.38811e-09	6.85456e-09	8.99494
A630073D07RIK	0	0	0	1	1	-9.37622
A630075F10RIK	0.114952	0.0994122	2.79498	0.00529778	0.0168488	-5.48275
A630076J17RIK	-0.00580238	0.0115405	-0.385102	0.70025	1	-9.302
A630077J23RIK	-0.0122515	0.00612573	-1.00018	0.317484	0.549456	-8.8758
A630081J09RIK	-0.582793	1.86537	-3.10707	0.00194725	0.00653644	-4.56947
A630089N07RIK	-0.204307	2.21	-1.17636	0.239754	0.492848	-8.68413
A630095E13RIK	0	0	0	1	1	-9.37622
A630095N17RIK	0.112064	0.0714301	3.818	0.000143507	0.00053742	-2.13723
A730004F24RIK	0	0	0	1	1	-9.37622
A730006G06RIK	0.00675435	0.0486766	0.224855	0.822142	1	-9.35092
A730009L09RIK	0	0	0	1	1	-9.37622
A730011C13RIK	0.0466197	0.865158	0.398471	0.690375	1	-9.29676
A730013G03RIK	0.0347325	0.122572	0.711757	0.476795	0.769847	-9.12273
A730017C20RIK	2.23472	3.3699	11.2347	1.52894e-27	1.36088e-26	49.8397
A730017L22RIK	0.250646	1.45476	1.91946	0.0552338	0.145709	-7.53586
A730018C14RIK	-0.00349925	0.0141792	-0.183504	0.854443	1	-9.35937
A730020E08RIK	0.63587	1.18301	4.43376	1.03721e-05	4.20401e-05	0.359674
A730020M07RIK	0	0	0	1	1	-9.37622
A730036I17RIK	0	0	0	1	1	-9.37622
A730043L09RIK	0.0696485	0.0489477	2.29495	0.021959	0.0634001	-6.74763
A730049H05RIK	0.00933462	0.00466731	1.00018	0.317485	0.549456	-8.8758
A730056A06RIK	0.431067	0.292844	5.98335	3.123e-09	1.51683e-08	8.20379
A730063M14RIK	0.373432	0.548647	4.21453	2.74858e-05	0.000108433	-0.570462
A730067D02RIK	0.0109682	0.0433907	0.399892	0.689328	1	-9.29619
A730082K24RIK	0.00747177	0.00589571	0.757095	0.449186	0.733617	-9.08942
A730085K08RIK	0.0642241	0.0652751	2.30269	0.0215177	0.0622501	-6.72994
A730089K16RIK	0.299193	0.448795	3.90071	0.000102859	0.000389504	-1.82277
A730090H04RIK	0.0667109	0.113669	1.25407	0.210133	0.44224	-8.58975
A730090N16RIK	-0.0112165	1.25407	-0.0750855	0.940163	1	-9.3734
A730098P11RIK	0.332314	0.419845	6.51966	1.15764e-10	5.98378e-10	11.4236
A830005F24RIK	0.444515	0.395328	5.21141	2.31191e-07	1.02607e-06	4.02103
A830009L08RIK	1.41001	1.17914	11.3182	6.63953e-28	5.97558e-27	50.6683
A830010M20RIK	3.18105	6.12665	17.1963	1.02835e-57	2.12464e-56	119.036
A830011K09RIK	0.364746	0.458049	4.24582	2.39794e-05	9.49927e-05	-0.440457
A830012C17RIK	0	0	0	1	1	-9.37622
A830018L16RIK	1.49971	5.58	8.36371	2.22222e-16	1.40593e-15	24.3734
A830019L24RIK	0.145154	0.114245	3.43492	0.000619092	0.0021957	-3.50829
A830019P07RIK	0.0841377	0.102563	1.85034	0.0645832	0.167305	-7.66577
A830021F12RIK	0.00558307	0.00279154	1.00018	0.317486	0.549456	-8.87581
A830021M18RIK	0.382538	0.467339	4.16057	3.47053e-05	0.000135881	-0.792432
A830029E22RIK	0.227094	0.174693	4.04669	5.62903e-05	0.000217073	-1.25186
A830035A12RIK	0.0502991	0.0285728	2.38152	0.0174428	0.0513203	-6.5462
A830035O19RIK	0.408901	0.591361	4.80745	1.78364e-06	7.56675e-06	2.04899
A830052D11RIK	0.339087	0.314166	4.71929	2.73259e-06	1.14697e-05	1.6387
A830082K12RIK	0.833506	3.14373	4.57368	5.44454e-06	2.24401e-05	0.976902
A830082N09RIK	1.13562	1.89163	6.47788	1.50975e-10	7.75231e-10	11.1636
A830092H15RIK	0.381959	0.866215	3.24369	0.00122222	0.00420003	-4.13988
A930001A20RIK	0	0	0	1	1	-9.37622
A930001C03RIK	0.717093	1.34093	5.23367	2.05707e-07	9.17035e-07	4.13406
A930002C04RIK	0.356667	0.558951	3.44556	0.000595524	0.00211658	-3.47211
A930003A15RIK	0.11158	0.0557902	3.39419	0.000717585	0.00252773	-3.64577
A930003O13RIK	0.088698	0.258524	1.32344	0.186015	0.400081	-8.50041
A930004D18RIK	0.732211	0.988976	6.41795	2.20391e-10	1.12357e-09	10.7935
A930005H10RIK	1.80828	2.0244	11.6903	1.52631e-29	1.44261e-28	54.417
A930006I01RIK	0	0	0	1	1	-9.37622
A930006K02RIK	0.137165	0.259677	1.93843	0.0528744	0.140243	-7.49937
A930007A09RIK	0.199561	0.162332	3.64786	0.00027922	0.00101983	-2.76353
A930007I19RIK	0.0525216	0.342734	0.871241	0.383849	0.645067	-8.99646
[truncated: 40,004 more rows]
