# Supplementary material for: Single-nucleus and single-cell transcriptomes compared in matched cortical cell types
Source: PLoS One. 2018 Dec 26;13(12):e0209648. doi: 10.1371/journal.pone.0209648 (PMC6306246; doi:10.1371/journal.pone.0209648)
Supplement: S6 Table — (XLSX) [file pone.0209648.s011.xlsx]

## Sheet: S6_Table
gene	GeneID	chromosome	description	type_of_gene	inh.clusters_nuc	exc.clusters_nuc	fpkm.max.cluster_nuc	fpkm.max_nuc	marker.score_nuc	inh.clusters_cell	exc.clusters_cell	fpkm.max.cluster_cell	fpkm.max_cell	marker.score_cell	nuclear.prop
0610005C13Rik	71661	7	RIKEN cDNA 0610005C13 gene	ncRNA	0	0	N1 Pvalb Wt1	0.559429	0.0615208	0	0	C11 L6a Sla	0.73913	0.0693418	0.133104
0610006L08Rik	76253	7	RIKEN cDNA 0610006L08 gene	unknown	0	0	N9 L5b Cdh13	0	0.0388018	0	0	C4 L5a Hsd11b1	0.00721805	0.0075188	0
0610007P14Rik	58520	12	ergosterol biosynthesis 28	protein-coding	1	4	N8 L5 Chrna6	69.3655	0.134113	2	9	C8 L5 Chrna6	68.7133	0.0786867	0.152467
0610009B22Rik	66050	11	RIKEN cDNA 0610009B22 gene	protein-coding	0	0	N10 L5b Tph2	24.9041	0.111184	2	8	C2 Sst Cbln4	65.9096	0.411362	0.103288
0610009E02Rik	100125929	2	RIKEN cDNA 0610009E02 gene	unknown	0	0	N2 Sst Cbln4	2.73955	0.129272	0	0	C4 L5a Hsd11b1	0.90985	0.144953	0.52427
0610009L18Rik	66838	11	RIKEN cDNA 0610009L18 gene	ncRNA	0	0	N11 L6a Sla	9.02125	0.0399869	1	2	C1 Pvalb Wt1	20.2284	0.309436	0.118258
0610010B08Rik	100039060	2	RIKEN cDNA 0610010B08 gene	protein-coding	0	0	N6 L6a Car12	0.00463415	0	0	0	C5 L5a Batf3	0.0034	0	0
0610010F05Rik	71675	11	RIKEN cDNA 0610010F05 gene	protein-coding	2	9	N4 L5a Hsd11b1	23.4197	0.187514	2	9	C5 L5a Batf3	13.2868	0.0380155	0.399063
0610010K14Rik	104457	11	RIKEN cDNA 0610010K14 gene	protein-coding	0	0	N2 Sst Cbln4	40.2986	0.123934	2	9	C7 L6a Mgp	66.2014	0.217301	0.104058
0610011F06Rik	68347	17	methyltransferase like 26	protein-coding	2	4	N1 Pvalb Wt1	126.269	0.257166	2	9	C2 Sst Cbln4	68.8987	0.209456	0.39971
0610012G03Rik	106264	16	RIKEN cDNA 0610012G03 gene	ncRNA	1	3	N10 L5b Tph2	70.9284	0.215337	2	9	C1 Pvalb Wt1	117.312	0.0918605	0.117982
0610025J13Rik	78687	4	RIKEN cDNA 0610025J13 gene	unknown	0	0	N9 L5b Cdh13	0.177059	0.0588235	0	0	C5 L5a Batf3	0.1676	0.0417611	0
0610030E20Rik	68364	6	RIKEN cDNA 0610030E20 gene	protein-coding	0	4	N3 L4 Arf5	11.5863	0.188713	2	9	C3 L4 Arf5	8.88244	0.188415	0.636722
0610031O16Rik	68369	3	RIKEN cDNA 0610031O16 gene	ncRNA	0	0	N9 L5b Cdh13	0	0	0	0	C11 L6a Sla	0	0	NA
0610037L13Rik	74098	4	RIKEN cDNA 0610037L13 gene	protein-coding	2	8	N6 L6a Car12	60.9617	0.184618	2	9	C1 Pvalb Wt1	49.9497	0.152732	0.336204
0610038B21Rik	70345	8	RIKEN cDNA 0610038B21 gene	ncRNA	0	0	N7 L6a Mgp	9.00421	0.255404	0	1	C4 L5a Hsd11b1	2.21128	0.266157	0.628033
0610039H22Rik	68397	11	RIKEN cDNA 0610039H22 gene	ncRNA	0	0	N3 L4 Arf5	1.54595	0.125546	0	0	C4 L5a Hsd11b1	0.529398	0.13847	0.56783
0610039K10Rik	68386	2	RIKEN cDNA 0610039K10 gene	ncRNA	1	4	N5 L5a Batf3	14.5388	0.353307	2	7	C5 L5a Batf3	18.2958	0.759251	0.176968
0610040B10Rik	67672	5	RIKEN cDNA 0610040B10 gene	ncRNA	0	0	N6 L6a Car12	11.6863	0.125336	1	1	C1 Pvalb Wt1	8.53844	0.290816	0.146195
0610040F04Rik	75394	6	RIKEN cDNA 0610040F04 gene	ncRNA	0	1	N8 L5 Chrna6	4.52727	0.35909	0	5	C10 L5b Tph2	8.84667	0.568803	0.117202
0610040J01Rik	76261	5	RIKEN cDNA 0610040J01 gene	protein-coding	0	0	N8 L5 Chrna6	12.2436	0.177814	0	0	C10 L5b Tph2	1.6837	0.241181	0.371453
0610043K17Rik	68400	4	RIKEN cDNA 0610043K17 gene	ncRNA	0	0	N3 L4 Arf5	10.5765	0.181647	0	3	C4 L5a Hsd11b1	3.76526	0.280892	0.356847
1010001N08Rik	68434	18	RIKEN cDNA 1010001N08 gene	ncRNA	0	0	N4 L5a Hsd11b1	0.158305	0	0	0	C4 L5a Hsd11b1	0.19985	0.0163927	0.445373
1100001I12Rik	75405	15	RIKEN cDNA 1100001I12 gene	ncRNA	0	0	N9 L5b Cdh13	0	0	0	0	C11 L6a Sla	0	0	NA
1110002J07Rik	68488	10	RIKEN cDNA 1110002J07 gene	ncRNA	0	0	N6 L6a Car12	2.15341	0.0509247	0	0	C6 L6a Car12	1.42769	0.179197	0.163085
1110002L01Rik	100043040	12	RIKEN cDNA 1110002L01 gene	ncRNA	2	9	N3 L4 Arf5	28.3429	0.0787792	2	9	C4 L5a Hsd11b1	40.8702	0.0284953	0.250995
1110002O04Rik	68483	1	RIKEN cDNA 1110002O04 gene	ncRNA	0	0	N4 L5a Hsd11b1	17.2822	0.123232	0	0	C4 L5a Hsd11b1	8.04241	0.237193	0.659902
1110004E09Rik	68001	16	RIKEN cDNA 1110004E09 gene	protein-coding	0	0	N8 L5 Chrna6	34.6109	0.149926	2	9	C8 L5 Chrna6	63.5767	0.125072	0.0866709
1110004F10Rik	56372	7	RIKEN cDNA 1110004F10 gene	protein-coding	2	7	N2 Sst Cbln4	132.29	0.195464	2	9	C11 L6a Sla	227.571	0.0150376	0.109558
1110006O24Rik	66123	5	RIKEN cDNA 1110006O24 gene	ncRNA	0	0	N6 L6a Car12	3.78634	0.0483819	0	0	C4 L5a Hsd11b1	1.84617	0.0708078	0.408898
1110007C09Rik	68480	13	caspase recruitment domain family, member 19	protein-coding	0	0	N4 L5a Hsd11b1	9.26966	0.104396	0	2	C8 L5 Chrna6	14.4478	0.251063	0.337206
1110008P14Rik	73737	2	RIKEN cDNA 1110008P14 gene	protein-coding	0	9	N10 L5b Tph2	344.003	0.551613	2	9	C7 L6a Mgp	1388.43	0	0.087796
1110015O18Rik	100503859	3	RIKEN cDNA 1110015O18 gene	ncRNA	0	0	N9 L5b Cdh13	0	0	0	0	C9 L5b Cdh13	0.221034	0.0344828	0
1110017D15Rik	73721	4	RIKEN cDNA 1110017D15 gene	protein-coding	0	0	N6 L6a Car12	6.47073	0.117007	0	3	C3 L4 Arf5	3.31178	0.296025	0.40659
1110018N20Rik	68941	2	RIKEN cDNA 1110018N20 gene	unknown	0	2	N7 L6a Mgp	13.3726	0.298752	0	9	C3 L4 Arf5	5.59467	0.360721	0.719555
1110019D14Rik	76311	6	RIKEN cDNA 1110019D14 gene	ncRNA	0	0	N6 L6a Car12	21.9988	0.11119	0	1	C8 L5 Chrna6	6.33778	0.272535	0.33495
1110020A21Rik	68531	17	RIKEN cDNA 1110020A21 gene	ncRNA	0	0	N7 L6a Mgp	12.6405	0.049879	0	0	C1 Pvalb Wt1	2.92937	0.177311	0.346317
1110025L11Rik	68637	16	RIKEN cDNA 1110025L11 gene	protein-coding	0	0	N9 L5b Cdh13	0	0	0	0	C11 L6a Sla	0	0	NA
1110028F11Rik	68690	11	RIKEN cDNA 1110028F11 gene	ncRNA	0	0	N7 L6a Mgp	6.42789	0.0526316	0	0	C3 L4 Arf5	0.00855556	0.037037	0
1110028F18Rik	68692	8	RIKEN cDNA 1110028F18 gene	ncRNA	0	0	N9 L5b Cdh13	0	0.010101	0	0	C11 L6a Sla	0	0	NA
1110032A03Rik	68721	9	RIKEN cDNA 1110032A03 gene	protein-coding	0	1	N3 L4 Arf5	17.2384	0.225367	2	9	C8 L5 Chrna6	27.1178	0.16177	0.147992
1110032F04Rik	68725	3	RIKEN cDNA 1110032F04 gene	protein-coding	0	0	N8 L5 Chrna6	16.7136	0.16421	1	6	C7 L6a Mgp	28.6067	0.604412	0.117489
1110034G24Rik	73747	2	RIKEN cDNA 1110034G24 gene	protein-coding	0	0	N3 L4 Arf5	3.88848	0.139402	2	9	C11 L6a Sla	6.78348	0.114642	0.153431
1110036E04Rik	68697	9	RIKEN cDNA 1110036E04 gene	ncRNA	0	0	N9 L5b Cdh13	0	0	0	0	C11 L6a Sla	0	0	NA
1110037F02Rik	66185	4	vir like m6A methyltransferase associated	protein-coding	2	9	N10 L5b Tph2	18.7166	0.167559	2	9	C7 L6a Mgp	8.69762	0.0591813	0.545479
1110038B12Rik	68763	17	RIKEN cDNA 1110038B12 gene	ncRNA	0	0	N4 L5a Hsd11b1	36.7125	0.187903	2	8	C4 L5a Hsd11b1	30.9411	0.289774	0.316714
1110038F14Rik	117171	15	RIKEN cDNA 1110038F14 gene	protein-coding	1	7	N8 L5 Chrna6	84.3	0.246201	2	9	C7 L6a Mgp	30.09	0.136273	0.423247
1110046J04Rik	68808	13	RIKEN cDNA 1110046J04 gene	ncRNA	0	0	N3 L4 Arf5	7.89873	0.144239	1	4	C4 L5a Hsd11b1	12.7528	0.248682	0.0903226
1110051M20Rik	228356	2	RIKEN cDNA 1110051M20 gene	protein-coding	2	9	N2 Sst Cbln4	29.7714	0.0670114	2	9	C10 L5b Tph2	31.357	0	0.236665
1110054M08Rik	68841	16	LIM domain containing preferred translocation partner in lipoma, opposite strand	ncRNA	0	0	N10 L5b Tph2	2.12375	0.0704218	0	1	C9 L5b Cdh13	3.91793	0.367415	0.0638318
1110057K04Rik	68832	12	lipid droplet associated hydrolase	protein-coding	2	7	N2 Sst Cbln4	16.9841	0.221255	2	9	C2 Sst Cbln4	17.0378	0.139357	0.207956
1110057P08Rik	68844	16	RIKEN cDNA 1110057P08 gene	unknown	0	0	N9 L5b Cdh13	0	0	0	0	C11 L6a Sla	0	0	NA
1110058D11Rik	68771	17	RIKEN cDNA 1110058D11 gene	ncRNA	0	0	N4 L5a Hsd11b1	3.15881	0.0373529	0	0	C4 L5a Hsd11b1	0.581504	0.019068	0.929236
1110059E24Rik	66206	19	RIKEN cDNA 1110059E24 gene	protein-coding	0	0	N6 L6a Car12	22.1946	0.146287	2	9	C1 Pvalb Wt1	64.1484	0.258304	0.0804417
1110059G10Rik	66202	9	RIKEN cDNA 1110059G10 gene	protein-coding	0	0	N11 L6a Sla	10.4166	0.0905218	2	9	C8 L5 Chrna6	14.2811	0.18471	0.16918
1110065P20Rik	68920	4	RIKEN cDNA 1110065P20 gene	protein-coding	0	0	N8 L5 Chrna6	29.98	0.192891	2	8	C1 Pvalb Wt1	74.4137	0.353027	0.091628
1190002F15Rik	381822	6	lncRNA downstream of Cdkn1b	ncRNA	0	0	N5 L5a Batf3	0.00939394	0.0169492	0	0	C11 L6a Sla	0	0.0332576	0
1190002N15Rik	68861	9	RIKEN cDNA 1190002N15 gene	protein-coding	1	1	N9 L5b Cdh13	28.9144	0.379479	2	6	C1 Pvalb Wt1	32.6825	0.563446	0.309229
1190003K10Rik	68880	13	family with sequence similarity 240 member B	protein-coding	0	0	N1 Pvalb Wt1	2.496	0.118154	0	0	C2 Sst Cbln4	1.68435	0.345576	0.146854
1190005I06Rik	68918	8	RIKEN cDNA 1190005I06 gene	protein-coding	0	0	N9 L5b Cdh13	6.22882	0.0566758	0	0	C8 L5 Chrna6	6.72778	0.257945	0.13009
1190007I07Rik	544717	10	RIKEN cDNA 1190007I07 gene	protein-coding	0	0	N10 L5b Tph2	30.5791	0.169998	2	9	C8 L5 Chrna6	38.2256	0.279844	0.106889
1190028D05Rik	330767	8	RIKEN cDNA 1190028D05 gene	unknown	0	0	N9 L5b Cdh13	0	0	0	0	C11 L6a Sla	0	0	NA
1200014J11Rik	66874	11	nuclear cap binding subunit 3	protein-coding	1	3	N2 Sst Cbln4	10.5614	0.19091	2	9	C10 L5b Tph2	4.20593	0.206248	0.383429
1300002E11Rik	100043489	16	RIKEN cDNA 1300002E11 gene	ncRNA	0	0	N3 L4 Arf5	6.85089	0.121529	2	8	C8 L5 Chrna6	5.24	0.235774	0.296874
1300017J02Rik	71775	9	RIKEN cDNA 1300017J02 gene	protein-coding	0	0	N9 L5b Cdh13	0	0.031875	0	0	C7 L6a Mgp	0.0333333	0.0624985	0
1500002F19Rik	76683	7	RIKEN cDNA 1500002F19 gene	ncRNA	0	0	N5 L5a Batf3	1.51545	0.0729795	2	6	C7 L6a Mgp	1.99048	0.38609	0.160301
1500004A13Rik	319830	3	RIKEN cDNA 1500004A13 gene	ncRNA	2	3	N8 L5 Chrna6	9.69455	0.160868	2	9	C2 Sst Cbln4	9.94696	0.171092	0.225132
1500009C09Rik	76505	15	RIKEN cDNA 1500009C09 gene	ncRNA	0	0	N1 Pvalb Wt1	10.0243	0.144113	2	9	C1 Pvalb Wt1	34.7362	0.298937	0.0669962
1500009L16Rik	69784	10	RIKEN cDNA 1500009L16 gene	protein-coding	0	1	N8 L5 Chrna6	59.0518	0.321929	1	5	C8 L5 Chrna6	92.94	0.417818	0.160057
1500011B03Rik	66236	5	RIKEN cDNA 1500011B03 gene	ncRNA	2	6	N11 L6a Sla	113.564	0.150576	2	9	C11 L6a Sla	201.874	0.0222222	0.140976
1500011K16Rik	67885	2	RIKEN cDNA 1500011K16 gene	ncRNA	0	0	N2 Sst Cbln4	35.8673	0.167115	2	9	C10 L5b Tph2	110.602	0.138712	0.060697
1500012F01Rik	68949	2	zinc finger, NFX1-type containing 1, antisense RNA 1	ncRNA	1	7	N10 L5b Tph2	77.3391	0.255861	2	9	C4 L5a Hsd11b1	43.0195	0.146269	0.476804
1500012K07Rik	68954	7	RIKEN cDNA 1500012K07 gene	ncRNA	0	0	N5 L5a Batf3	1.50556	0.122036	0	1	C6 L6a Car12	0.879615	0.328881	0.213206
1500015A07Rik	68982	18	RIKEN cDNA 1500015A07 gene	ncRNA	0	0	N2 Sst Cbln4	25.61	0.135429	1	5	C7 L6a Mgp	13.7062	0.187359	0.570166
1500015L24Rik	68994	19	RIKEN cDNA 1500015L24 gene	ncRNA	0	0	N3 L4 Arf5	3.9843	0.0248125	0	0	C11 L6a Sla	0	0.057063	0
1500015O10Rik	78896	1	RIKEN cDNA 1500015O10 gene	protein-coding	0	0	N4 L5a Hsd11b1	2.07373	0.0414072	0	0	C4 L5a Hsd11b1	0.21218	0.074373	0.831271
1500017E21Rik	668215	19	Hectd2, opposite strand	ncRNA	0	4	N7 L6a Mgp	50.2284	0.30126	1	9	C3 L4 Arf5	17.6442	0.260215	0.60951
1500026H17Rik	69002	10	RIKEN cDNA 1500026H17 gene	ncRNA	0	0	N3 L4 Arf5	5.60152	0.143723	2	9	C11 L6a Sla	4.79783	0.170801	0.2771
1500035N22Rik	70258	5	RIKEN cDNA 1500035N22 gene	unknown	0	0	N8 L5 Chrna6	2.02364	0.13391	0	1	C11 L6a Sla	2.46739	0.225989	0.273112
1520401A03Rik	320309	17	RIKEN cDNA 1520401A03 gene	protein-coding	0	0	N4 L5a Hsd11b1	0.612881	0.110262	0	0	C7 L6a Mgp	0.494286	0.0960564	0.156513
1600002D24Rik	69776	16	RIKEN cDNA 1600002D24 gene	ncRNA	0	0	N9 L5b Cdh13	0	0.0423107	0	0	C9 L5b Cdh13	0.34069	0.0747242	0
1600002H07Rik	72016	17	tubulin epsilon and delta complex 2	protein-coding	0	0	N4 L5a Hsd11b1	16.6088	0.154075	0	1	C4 L5a Hsd11b1	9.61647	0.186552	0.595
1600002K03Rik	69770	10	RIKEN cDNA 1600002K03 gene	protein-coding	0	1	N6 L6a Car12	25.1771	0.178249	1	9	C4 L5a Hsd11b1	18.8261	0.198956	0.381801
1600010M07Rik	69781	7	RIKEN cDNA 1600010M07 gene	ncRNA	0	0	N4 L5a Hsd11b1	2.12644	0.0258407	0	0	C11 L6a Sla	0	0.0255594	0
1600012H06Rik	67912	17	RIKEN cDNA 1600012H06 gene	protein-coding	0	0	N11 L6a Sla	31.5603	0.113158	2	9	C7 L6a Mgp	16.2076	0.212114	0.406658
1600014C10Rik	72244	7	RIKEN cDNA 1600014C10 gene	protein-coding	0	0	N2 Sst Cbln4	13.5805	0.0958008	2	8	C9 L5b Cdh13	10.3614	0.298418	0.171721
1600014C23Rik	72240	17	RIKEN cDNA 1600014C23 gene	protein-coding	0	0	N2 Sst Cbln4	1.79273	0.0454545	0	0	C1 Pvalb Wt1	0.231875	0.0237828	0
1600015I10Rik	69761	6	RIKEN cDNA 1600015I10 gene	protein-coding	0	0	N9 L5b Cdh13	0	0	0	0	C11 L6a Sla	0	0	NA
1600019K03Rik	69768	16	RIKEN cDNA 1600019K03 gene	ncRNA	0	0	N9 L5b Cdh13	0	0	0	0	C11 L6a Sla	0	0	NA
1600020E01Rik	72012	6	RIKEN cDNA 1600020E01 gene	ncRNA	1	6	N8 L5 Chrna6	96.7291	0.25243	2	9	C3 L4 Arf5	27.8857	0.110098	0.690461
1600023N17Rik	69788	5	RIKEN cDNA 1600023N17 gene	ncRNA	0	0	N4 L5a Hsd11b1	5.18695	0.0333619	0	0	C3 L4 Arf5	3.51089	0.10466	0.304529
1600027J07Rik	69794	8	RIKEN cDNA 1600027J07 gene	ncRNA	0	0	N9 L5b Cdh13	0	0	0	0	C11 L6a Sla	0	0.02	NA
1600029I14Rik	69797	9	RIKEN cDNA 1600029I14 gene	ncRNA	0	0	N9 L5b Cdh13	0	0	0	0	C1 Pvalb Wt1	0.02	0.0728833	0
1600029O15Rik	665268	9	ribosomal protein L17 pseudogene	pseudo	0	0	N11 L6a Sla	15.4272	0.17913	0	0	C11 L6a Sla	6.61348	0.205974	0.505776
1700001C02Rik	75434	5	RIKEN cDNA 1700001C02 gene	protein-coding	0	0	N9 L5b Cdh13	0	0	0	0	C11 L6a Sla	0	0	NA
1700001C19Rik	75462	17	RIKEN cDNA 1700001C19 gene	protein-coding	0	0	N9 L5b Cdh13	0.0132353	0.0169492	0	0	C11 L6a Sla	0	0.0332576	0
1700001D01Rik	69279	8	RIKEN cDNA 1700001D01 gene	ncRNA	0	0	N8 L5 Chrna6	4.24	0.190352	0	0	C3 L4 Arf5	0.979222	0.111752	0.471006
1700001F09Rik	71826	14	RIKEN cDNA 1700001F09 gene	protein-coding	0	0	N4 L5a Hsd11b1	0.129153	0.0508475	0	0	C3 L4 Arf5	0.0688889	0.0111111	0
1700001G01Rik	75433	18	RIKEN cDNA 1700001G01 gene	ncRNA	0	0	N6 L6a Car12	0.0190244	0	0	0	C11 L6a Sla	0	0.0344828	0
1700001G11Rik	69303	14	RIKEN cDNA 1700001G11 gene	ncRNA	0	2	N10 L5b Tph2	7.44375	0.19723	0	3	C10 L5b Tph2	4.05889	0.400302	0.385575
1700001G17Rik	67503	1	RIKEN cDNA 1700001G17 gene	ncRNA	0	0	N9 L5b Cdh13	5.93353	0.0659849	0	0	C8 L5 Chrna6	4.53	0.135767	0.190728
1700001J03Rik	69282	5	RIKEN cDNA 1700001J03 gene	protein-coding	0	0	N10 L5b Tph2	5.74625	0.053546	0	0	C4 L5a Hsd11b1	0.0597744	0.0163927	0.48852
1700001J11Rik	72224	9	ring finger protein 19A pseudogene	pseudo	0	0	N9 L5b Cdh13	0	0	0	0	C2 Sst Cbln4	0.0108696	0	0
1700001K19Rik	66323	12	RIKEN cDNA 1700001K19 gene	protein-coding	0	0	N11 L6a Sla	3.43875	0.127681	0	0	C3 L4 Arf5	0.692444	0.144393	0.659703
1700001K23Rik	69319	19	RIKEN cDNA 1700001K23 gene	ncRNA	0	0	N11 L6a Sla	2.33812	0.0461265	0	0	C2 Sst Cbln4	0.955217	0.0387065	0.174749
1700001L05Rik	69291	15	RIKEN cDNA 1700001L05 gene	ncRNA	0	0	N8 L5 Chrna6	3.73909	0.116085	0	0	C3 L4 Arf5	2.04167	0.260038	0.433564
1700001L19Rik	69315	13	RIKEN cDNA 1700001L19 gene	protein-coding	0	0	N7 L6a Mgp	13.1316	0.250202	1	9	C10 L5b Tph2	25.5204	0.42578	0.0828526
1700001O22Rik	73598	2	RIKEN cDNA 1700001O22 gene	protein-coding	1	0	N1 Pvalb Wt1	20.2731	0.272245	2	3	C1 Pvalb Wt1	11.2909	0.444866	0.525403
1700001P01Rik	72215	11	RIKEN cDNA 1700001P01 gene	protein-coding	0	0	N7 L6a Mgp	3.97	0.049313	0	0	C3 L4 Arf5	2.13156	0.0712647	0.254359
1700003C15Rik	69345	5	RIKEN cDNA 1700003C15 gene	ncRNA	0	0	N9 L5b Cdh13	0	0	0	0	C11 L6a Sla	0	0.02	NA
1700003D09Rik	69338	11	RIKEN cDNA 1700003D09 gene	ncRNA	0	0	N7 L6a Mgp	5.15263	0.147156	0	6	C7 L6a Mgp	9.39429	0.542679	0.0904707
1700003E16Rik	71837	6	RIKEN cDNA 1700003E16 gene	protein-coding	0	0	N3 L4 Arf5	5.54861	0.100336	0	5	C11 L6a Sla	9.14783	0.26501	0.117863
1700003F12Rik	75480	2	RIKEN cDNA 1700003F12 gene	protein-coding	0	0	N2 Sst Cbln4	1.34818	0.0318136	0	0	C6 L6a Car12	0.824231	0.13738	0.226554
1700003G13Rik	72229	9	RIKEN cDNA 1700003G13 gene	ncRNA	0	0	N9 L5b Cdh13	0	0	0	0	C11 L6a Sla	0	0	NA
1700003G18Rik	69350	7	RIKEN cDNA 1700003G18 gene	ncRNA	0	0	N1 Pvalb Wt1	1.41771	0.314012	1	0	C1 Pvalb Wt1	0.597187	0.449816	0.139429
1700003H04Rik	384775	3	RIKEN cDNA 1700003H04 gene	ncRNA	0	0	N9 L5b Cdh13	0	0.0243902	0	0	C11 L6a Sla	0	0	NA
1700003I22Rik	69356	1	RIKEN cDNA 1700003I22 gene	ncRNA	0	0	N9 L5b Cdh13	0	0	0	0	C11 L6a Sla	0	0	NA
1700003L19Rik	75493	16	RIKEN cDNA 1700003L19 gene	ncRNA	0	0	N6 L6a Car12	1.91049	0.0852653	0	0	C4 L5a Hsd11b1	0.14812	0.0712721	0.327402
1700003M02Rik	69329	4	cilia and flagella associated protein 206	protein-coding	0	0	N10 L5b Tph2	1.82406	0.0972218	0	0	C10 L5b Tph2	1.87296	0.237588	0.229202
1700003M07Rik	72225	4	RIKEN cDNA 1700003M07 gene	ncRNA	0	0	N7 L6a Mgp	5.51421	0.0569648	0	0	C6 L6a Car12	2.08538	0.211448	0.325325
1700003O11Rik	75632	18	RIKEN cDNA 1700003O11 gene	unknown	0	0	N4 L5a Hsd11b1	2.45864	0.0694127	0	0	C6 L6a Car12	0.710385	0.0784353	0.495809
1700003P14Rik	75890	13	RIKEN cDNA 1700003P14 gene	ncRNA	0	0	N9 L5b Cdh13	0	0.0285714	0	0	C11 L6a Sla	0	0.02	NA
1700006A11Rik	71824	3	RIKEN cDNA 1700006A11 gene	protein-coding	0	0	N9 L5b Cdh13	0	0	0	0	C11 L6a Sla	0	0	NA
1700006E09Rik	75437	11	RIKEN cDNA 1700006E09 gene	protein-coding	0	0	N5 L5a Batf3	0.247273	0.043863	0	0	C4 L5a Hsd11b1	0.124361	0.0737319	0.537449
1700006F04Rik	75432	14	RIKEN cDNA 1700006F04 gene	ncRNA	0	1	N3 L4 Arf5	23.4372	0.307059	0	3	C3 L4 Arf5	9.72033	0.46192	0.948071
1700006H20Rik	72241	3	RIKEN cDNA 1700006H20 gene	ncRNA	0	0	N4 L5a Hsd11b1	3.25797	0.0281765	0	0	C7 L6a Mgp	1.42238	0.0823305	0.121245
1700006H21Rik	72257	13	RIKEN cDNA 1700006H21 gene	ncRNA	0	0	N9 L5b Cdh13	0	0	0	0	C11 L6a Sla	0	0	NA
1700007B14Rik	71831	8	IQ motif containing M	protein-coding	0	2	N4 L5a Hsd11b1	1.50898	0.282881	0	0	C5 L5a Batf3	0.5578	0.209314	0.334738
1700007E05Rik	114672	16	RIKEN cDNA 1700007E05 gene	unknown	0	0	N5 L5a Batf3	0.107677	0.010101	0	0	C3 L4 Arf5	0.00866667	0.0111111	0.435097
1700007F19Rik	67850	3	RIKEN cDNA 1700007F19 gene	ncRNA	0	0	N3 L4 Arf5	2.1738	0.238923	0	0	C3 L4 Arf5	1.24033	0.236585	0.525459
1700007G11Rik	75784	5	RIKEN cDNA 1700007G11 gene	protein-coding	0	0	N7 L6a Mgp	0.891579	0.140239	0	0	C3 L4 Arf5	1.18467	0.172115	0.163564
1700007J10Rik	69320	11	RIKEN cDNA 1700007J10 gene	ncRNA	0	0	N9 L5b Cdh13	3.34471	0.0975685	0	0	C3 L4 Arf5	0.966222	0.139003	0.565444
1700007K09Rik	69318	7	RIKEN cDNA 1700007K09 gene	protein-coding	0	0	N10 L5b Tph2	1.2375	0.027954	0	0	C1 Pvalb Wt1	0.748125	0.0596894	0.0314471
1700007K13Rik	69327	2	RIKEN cDNA 1700007K13 gene	protein-coding	0	0	N11 L6a Sla	5.43469	0.0582478	0	4	C10 L5b Tph2	20.613	0.48218	0.0917307
1700007L15Rik	100502742	16	RIKEN cDNA 1700007L15 gene	ncRNA	0	0	N7 L6a Mgp	5.65368	0.0567843	0	0	C10 L5b Tph2	2.5637	0.161336	0.132447
1700007P06Rik	69308	1	RIKEN cDNA 1700007P06 gene	ncRNA	0	0	N6 L6a Car12	14.1317	0.14308	0	1	C6 L6a Car12	5.29269	0.29377	0.562444
1700008C04Rik	75494	12	RIKEN cDNA 1700008C04 gene	ncRNA	0	0	N9 L5b Cdh13	0	0.03125	0	0	C11 L6a Sla	0	0.0880258	NA
1700008F21Rik	75453	8	coiled-coil domain containing 7B	protein-coding	2	9	N3 L4 Arf5	1.74203	0.0253292	2	9	C4 L5a Hsd11b1	0.445865	0.131694	0.675476
1700008J07Rik	629159	7	RIKEN cDNA 1700008J07 gene	ncRNA	0	0	N2 Sst Cbln4	15.865	0.158305	0	1	C7 L6a Mgp	2.1719	0.177648	0.379866
1700008K24Rik	69311	17	RIKEN cDNA 1700008K24 gene	ncRNA	0	0	N6 L6a Car12	4.77268	0.0243902	0	0	C3 L4 Arf5	1.83833	0.0186734	0
1700008O03Rik	69349	7	RIKEN cDNA 1700008O03 gene	protein-coding	1	9	N10 L5b Tph2	18.7775	0.32256	2	9	C4 L5a Hsd11b1	9.77256	0.0400073	0.443343
1700008P02Rik	69347	3	RIKEN cDNA 1700008P02 gene	protein-coding	0	0	N9 L5b Cdh13	0	0	0	0	C11 L6a Sla	0	0	NA
1700009C05Rik	74220	6	RIKEN cDNA 1700009C05 gene	ncRNA	0	0	N9 L5b Cdh13	0	0.010101	0	0	C11 L6a Sla	0	0.0132142	NA
1700009J07Rik	75188	10	RIKEN cDNA 1700009J07 gene	ncRNA	0	0	N9 L5b Cdh13	0	0	0	0	C11 L6a Sla	0	0	NA
1700009N14Rik	75471	4	RIKEN cDNA 1700009N14 gene	protein-coding	0	0	N9 L5b Cdh13	0	0	0	0	C11 L6a Sla	0	0	NA
1700010B08Rik	75485	2	RIKEN cDNA 1700010B08 gene	protein-coding	0	0	N9 L5b Cdh13	0	0	0	0	C11 L6a Sla	0	0	NA
1700010H22Rik	75500	5	RIKEN cDNA 1700010H22 gene	unknown	0	0	N9 L5b Cdh13	0	0	0	0	C3 L4 Arf5	0.124111	0.0210594	0
1700010I02Rik	75476	3	RIKEN cDNA 1700010I02 gene	ncRNA	0	0	N9 L5b Cdh13	0	0	0	0	C11 L6a Sla	0	0	NA
1700010I14Rik	66931	17	RIKEN cDNA 1700010I14 gene	protein-coding	0	0	N2 Sst Cbln4	7.23227	0.0895239	0	0	C8 L5 Chrna6	0.512222	0.0773166	0.357383
1700010J16Rik	69355	10	RIKEN cDNA 1700010J16 gene	ncRNA	0	0	N9 L5b Cdh13	0	0.0435251	0	0	C6 L6a Car12	0.0561538	0.0453815	0
1700010K23Rik	75501	16	RIKEN cDNA 1700010K23 gene	ncRNA	1	5	N7 L6a Mgp	46.6463	0.210588	2	9	C3 L4 Arf5	62.7853	0.125819	0.235723
1700010L04Rik	619808	7	RIKEN cDNA 1700010L04 gene	unknown	0	0	N9 L5b Cdh13	0.954118	0.0947029	0	0	C10 L5b Tph2	0.192222	0.122908	0.115773
1700010N08Rik	545951	7	predicted gene 28453	ncRNA	0	0	N9 L5b Cdh13	0	0	0	0	C10 L5b Tph2	0.314074	0.0318818	0
1700011A15Rik	66322	15	keratin 88	protein-coding	0	0	N9 L5b Cdh13	0.0529412	0	0	0	C7 L6a Mgp	1.06524	0.0952381	0
1700011B04Rik	100503727	13	RIKEN cDNA 1700011B04 gene	ncRNA	0	0	N9 L5b Cdh13	0	0	0	0	C11 L6a Sla	0	0	NA
1700011C11Rik	75451	7	RIKEN cDNA 1700011C11 gene	ncRNA	0	0	N9 L5b Cdh13	0	0.027954	0	0	C11 L6a Sla	0	0.0302949	NA
1700011E24Rik	75467	17	sperm tail PG rich repeat containing 4	protein-coding	0	0	N6 L6a Car12	0.00634146	0.0249077	0	0	C3 L4 Arf5	0.202	0.0728723	0.00248744
1700011H14Rik	67082	14	RIKEN cDNA 1700011H14 gene	protein-coding	0	0	N7 L6a Mgp	4.42895	0.0629896	0	0	C1 Pvalb Wt1	0.59125	0.0958224	0.515386
1700011I03Rik	75444	18	RIKEN cDNA 1700011I03 gene	protein-coding	0	0	N9 L5b Cdh13	1.15588	0.0634083	0	0	C7 L6a Mgp	0.925238	0.272085	0.198627
1700011L22Rik	67687	8	RIKEN cDNA 1700011L22 gene	protein-coding	0	0	N1 Pvalb Wt1	0.292286	0.0632105	0	0	C3 L4 Arf5	0.278	0.0454566	0
1700012A03Rik	76382	6	RIKEN cDNA 1700012A03 gene	protein-coding	0	0	N9 L5b Cdh13	0	0	0	0	C11 L6a Sla	1.34217	0.0434783	0
1700012B07Rik	69324	11	RIKEN cDNA 1700012B07 gene	protein-coding	0	0	N9 L5b Cdh13	0	0	0	0	C9 L5b Cdh13	0.0641379	0.0344828	0
1700012B09Rik	69325	9	RIKEN cDNA 1700012B09 gene	protein-coding	0	0	N9 L5b Cdh13	0	0	0	0	C11 L6a Sla	0	0	NA
1700012C14Rik	69337	6	RIKEN cDNA 1700012C14 gene	ncRNA	0	0	N9 L5b Cdh13	1.02912	0.0294118	0	0	C3 L4 Arf5	1.06411	0.0266159	0
1700012D01Rik	72243	10	RIKEN cDNA 1700012D01 gene	ncRNA	0	0	N3 L4 Arf5	0.901266	0.0432117	0	0	C7 L6a Mgp	6.99476	0.177611	0.0172822
1700012D14Rik	75479	7	RIKEN cDNA 1700012D14 gene	ncRNA	0	0	N11 L6a Sla	17.3062	0.140328	0	0	C2 Sst Cbln4	4.23261	0.143715	0.706553
1700012D16Rik	75489	3	RIKEN cDNA 1700012D16 gene	ncRNA	0	0	N3 L4 Arf5	0.389367	0.0283334	0	0	C7 L6a Mgp	0.346667	0.0404405	0
1700012H19Rik	76393	11	RIKEN cDNA 1700012H19 gene	ncRNA	0	0	N2 Sst Cbln4	4.02864	0.0454545	0	0	C2 Sst Cbln4	0.152609	0.0434783	1
1700012I11Rik	69334	15	RIKEN cDNA 1700012I11 gene	ncRNA	0	0	N9 L5b Cdh13	0	0.0339591	0	0	C11 L6a Sla	0	0.028602	NA
1700012J15Rik	75487	6	RIKEN cDNA 1700012J15 gene	ncRNA	0	0	N9 L5b Cdh13	0	0	0	0	C11 L6a Sla	0	0.0075188	NA
1700012P22Rik	69364	4	RIKEN cDNA 1700012P22 gene	protein-coding	0	0	N9 L5b Cdh13	0	0	0	0	C11 L6a Sla	0	0	NA
1700013D24Rik	76921	6	RIKEN cDNA 1700013D24 gene	protein-coding	0	0	N1 Pvalb Wt1	1.47314	0.0571429	0	0	C11 L6a Sla	0	0.0150376	0
1700013F07Rik	75504	3	RIKEN cDNA 1700013F07 gene	protein-coding	0	0	N7 L6a Mgp	13.5937	0.0597894	0	0	C6 L6a Car12	3.56115	0.167805	0.275665
1700013G24Rik	69380	4	RIKEN cDNA 1700013G24 gene	protein-coding	0	0	N9 L5b Cdh13	0	0	0	0	C11 L6a Sla	0	0	NA
1700013N06Rik	75634	12	RIKEN cDNA 1700013N06 gene	ncRNA	0	0	N9 L5b Cdh13	0	0	0	0	C11 L6a Sla	0	0	NA
1700015C15Rik	75532	13	RIKEN cDNA 1700015C15 gene	unknown	0	0	N3 L4 Arf5	4.28481	0.0334937	0	0	C1 Pvalb Wt1	1.19656	0.064064	0.319591
1700015E13Rik	76925	1	spermatogenesis associated 46	protein-coding	0	0	N7 L6a Mgp	2.07579	0.0741062	0	0	C2 Sst Cbln4	1.65783	0.0959202	0.102377
1700015F17Rik	381716	5	RIKEN cDNA 1700015F17 gene	protein-coding	0	0	N3 L4 Arf5	2.01177	0.0520028	0	0	C6 L6a Car12	0.985769	0.114379	0.150418
1700015G11Rik	100503036	7	RIKEN cDNA 1700015G11 gene	protein-coding	0	0	N9 L5b Cdh13	0	0	0	0	C11 L6a Sla	0	0	NA
1700016B01Rik	75640	5	RIKEN cDNA 1700016B01 gene	ncRNA	0	0	N9 L5b Cdh13	0	0	0	0	C11 L6a Sla	0	0	NA
1700016C15Rik	69428	1	RIKEN cDNA 1700016C15 gene	protein-coding	0	0	N10 L5b Tph2	0.2225	0.123762	0	0	C7 L6a Mgp	0.287619	0.0820778	0.101321
1700016C19Rik	74228	5	RIKEN cDNA 1700016C19 gene	unknown	0	0	N9 L5b Cdh13	0	0	0	0	C7 L6a Mgp	0.0242857	0.0375127	0
1700016D06Rik	76413	8	RIKEN cDNA 1700016D06 gene	protein-coding	0	0	N7 L6a Mgp	0.0594737	0.0625	0	0	C4 L5a Hsd11b1	0.0319549	0.0357735	0
1700016G14Rik	666145	13	RIKEN cDNA 1700016G14 gene	protein-coding	0	0	N3 L4 Arf5	0.742405	0.0557762	0	0	C4 L5a Hsd11b1	0.452105	0.0663277	0.0681862
1700016G22Rik	71867	13	RIKEN cDNA 1700016G22 gene	ncRNA	0	0	N9 L5b Cdh13	0	0	0	0	C2 Sst Cbln4	0.577391	0.0380155	0
1700016H13Rik	74218	5	RIKEN cDNA 1700016H13 gene	protein-coding	0	0	N9 L5b Cdh13	0	0	0	0	C6 L6a Car12	0.209615	0.0384615	0
1700016J18Rik	75561	10	RIKEN cDNA 1700016J18 gene	ncRNA	0	0	N1 Pvalb Wt1	2.92914	0.0482303	0	0	C2 Sst Cbln4	0.721739	0.127032	0.437527
1700016K19Rik	74230	11	RIKEN cDNA 1700016K19 gene	protein-coding	0	0	N6 L6a Car12	2.40195	0.0487805	0	0	C6 L6a Car12	8.05769	0.360307	0.0248227
1700016L04Rik	69412	10	RIKEN cDNA 1700016L04 gene	ncRNA	0	0	N1 Pvalb Wt1	1.29771	0.0215171	0	0	C11 L6a Sla	0.374348	0.0708681	0.315862
1700016L21Rik	72208	1	RIKEN cDNA 1700016L21 gene	ncRNA	0	0	N9 L5b Cdh13	0	0	0	0	C11 L6a Sla	0	0.0306125	NA
1700016P04Rik	69413	6	RIKEN cDNA 1700016P04 gene	ncRNA	0	0	N9 L5b Cdh13	0	0	0	0	C11 L6a Sla	0	0	NA
1700017B05Rik	74211	9	RIKEN cDNA 1700017B05 gene	protein-coding	0	0	N8 L5 Chrna6	3.61364	0.1041	0	0	C4 L5a Hsd11b1	1.66459	0.29313	0.518799
1700017D01Rik	69369	19	RIKEN cDNA 1700017D01 gene	protein-coding	0	0	N9 L5b Cdh13	0	0.0361211	0	0	C6 L6a Car12	0.0107692	0.0366095	0
1700017G19Rik	100040882	3	RIKEN cDNA 1700017G19 gene	ncRNA	0	0	N9 L5b Cdh13	0	0	0	0	C2 Sst Cbln4	0.0730435	0.0869565	0
1700017J07Rik	75508	2	RIKEN cDNA 1700017J07 gene	ncRNA	0	0	N9 L5b Cdh13	0	0	0	0	C1 Pvalb Wt1	0.693125	0.03125	0
1700017L05Rik	69370	5	RIKEN cDNA 1700017L05 gene	ncRNA	0	0	N9 L5b Cdh13	0	0	0	0	C11 L6a Sla	0	0	NA
1700017M07Rik	76398	3	RIKEN cDNA 1700017M07 gene	ncRNA	0	0	N9 L5b Cdh13	0	0.0126582	0	0	C11 L6a Sla	0	0.0302291	NA
1700017N19Rik	66605	10	RIKEN cDNA 1700017N19 gene	protein-coding	0	0	N9 L5b Cdh13	0	0	0	0	C11 L6a Sla	0	0	NA
1700018A04Rik	71307	13	RIKEN cDNA 1700018A04 gene	ncRNA	0	0	N9 L5b Cdh13	0	0.0126582	0	0	C11 L6a Sla	0	0.0111111	NA
1700018A23Rik	72231	6	RIKEN cDNA 1700018A23 gene	ncRNA	1	2	N1 Pvalb Wt1	13.8829	0.236083	2	9	C1 Pvalb Wt1	36.2463	0.0803816	0.0838007
1700018B08Rik	76405	8	RIKEN cDNA 1700018B08 gene	protein-coding	0	0	N1 Pvalb Wt1	1.91343	0.0475074	0	0	C10 L5b Tph2	0.116296	0.0251048	0
1700018B24Rik	66332	3	enhancer of rudimentary homolog pseudogene	pseudo	0	0	N9 L5b Cdh13	0	0	0	0	C11 L6a Sla	0	0	NA
1700018C11Rik	75524	4	testis expressed 48	protein-coding	0	0	N8 L5 Chrna6	6.94909	0.0697123	0	0	C4 L5a Hsd11b1	1.36338	0.162394	0
1700018F24Rik	69396	5	RIKEN cDNA 1700018F24 gene	protein-coding	0	0	N9 L5b Cdh13	0	0	0	0	C11 L6a Sla	0	0	NA
1700018L02Rik	67329	19	RIKEN cDNA 1700018L02 gene	ncRNA	0	0	N4 L5a Hsd11b1	1.63492	0.0486403	1	7	C1 Pvalb Wt1	3.71219	0.47339	0.0783337
1700019A02Rik	69397	1	RIKEN cDNA 1700019A02 gene	protein-coding	0	0	N6 L6a Car12	0.463171	0.09805	0	0	C11 L6a Sla	0.535652	0.160891	0.254598
1700019B03Rik	76406	8	testis expressed 45	protein-coding	0	0	N9 L5b Cdh13	1.46588	0.0515832	0	0	C9 L5b Cdh13	0.290345	0.0568232	0.624129
1700019C18Rik	75543	13	RIKEN cDNA 1700019C18 gene	ncRNA	0	0	N9 L5b Cdh13	0	0	0	0	C1 Pvalb Wt1	0.438437	0.03125	0
1700019D03Rik	67080	1	RIKEN cDNA 1700019D03 gene	protein-coding	1	5	N1 Pvalb Wt1	26.7466	0.316624	2	8	C10 L5b Tph2	19.9659	0.357556	0.330525
1700019E08Rik	69405	2	RIKEN cDNA 1700019E08 gene	ncRNA	0	0	N9 L5b Cdh13	0	0	0	0	C11 L6a Sla	0	0	NA
1700019F05Rik	69402	5	RIKEN cDNA 1700019F05 gene	ncRNA	0	0	N9 L5b Cdh13	0	0	0	0	C11 L6a Sla	0	0.047619	NA
1700019G17Rik	75541	6	N-acetyltransferase 8 (GCN5-related) family member 4	protein-coding	0	0	N2 Sst Cbln4	1.42455	0.0850922	0	0	C7 L6a Mgp	0.821905	0.102197	0.303184
1700019G24Rik	72249	6	RIKEN cDNA 1700019G24 gene	ncRNA	0	0	N11 L6a Sla	3.26625	0.193383	0	5	C11 L6a Sla	1.36478	0.30595	0.666127
1700019J19Rik	76412	9	RIKEN cDNA 1700019J19 gene	unknown	0	0	N10 L5b Tph2	0.78	0.0623164	0	0	C4 L5a Hsd11b1	0.0703008	0.0514214	0
1700019L03Rik	227736	2	cilia and flagella associated protein 157	protein-coding	0	0	N6 L6a Car12	2.43415	0.0440708	0	2	C3 L4 Arf5	1.32678	0.261198	0.293409
1700019L22Rik	75549	8	RIKEN cDNA 1700019L22 gene	ncRNA	2	7	N9 L5b Cdh13	2.63147	0.257665	1	7	C9 L5b Cdh13	0.383793	0.357149	0.66767
1700019M22Rik	69423	12	NFX-like protein	pseudo	0	0	N9 L5b Cdh13	0	0	0	0	C11 L6a Sla	0	0	NA
1700019N19Rik	67507	19	RIKEN cDNA 1700019N19 gene	protein-coding	0	0	N9 L5b Cdh13	0	0	0	0	C9 L5b Cdh13	0.291724	0.0689655	0
1700019O17Rik	71863	1	testis expressed 44	protein-coding	0	0	N9 L5b Cdh13	0	0	0	0	C1 Pvalb Wt1	0.0325	0.03125	0
1700019P21Rik	75546	1	RIKEN cDNA 1700019P21 gene	ncRNA	0	0	N9 L5b Cdh13	0	0	0	0	C10 L5b Tph2	0.11	0.037037	0
1700020A23Rik	75656	2	RIKEN cDNA 1700020A23 gene	protein-coding	0	0	N6 L6a Car12	1.15366	0.0185865	0	0	C4 L5a Hsd11b1	0.437669	0.0132142	0.154428
1700020D05Rik	75555	19	RIKEN cDNA 1700020D05 gene	protein-coding	0	0	N7 L6a Mgp	3.83632	0.0352766	0	0	C4 L5a Hsd11b1	0.326466	0.0307589	0.416886
1700020D12Rik	69437	12	RIKEN cDNA 1700020D12 gene	ncRNA	0	0	N9 L5b Cdh13	0	0	0	0	C11 L6a Sla	0	0	NA
1700020G17Rik	75630	10	RIKEN cDNA 1700020G17 gene	ncRNA	0	0	N9 L5b Cdh13	0	0.080163	0	0	C11 L6a Sla	0	0.0356895	NA
1700020I14Rik	66602	2	RIKEN cDNA 1700020I14 gene	ncRNA	2	4	N11 L6a Sla	55.8837	0.213509	2	9	C1 Pvalb Wt1	107.336	0.0379183	0.135809
1700020L24Rik	66330	11	RIKEN cDNA 1700020L24 gene	protein-coding	0	0	N9 L5b Cdh13	0	0	0	0	C1 Pvalb Wt1	0.61125	0.0743746	0
1700020M21Rik	76402	9	RIKEN cDNA 1700020M21 gene	ncRNA	0	0	N9 L5b Cdh13	0	0	0	0	C11 L6a Sla	0	0	NA
1700020N01Rik	67692	10	RIKEN cDNA 1700020N01 gene	ncRNA	0	0	N9 L5b Cdh13	0	0.0909091	0	0	C6 L6a Car12	1.46654	0.0333046	0
1700020N18Rik	67086	1	RIKEN cDNA 1700020N18 gene	ncRNA	0	0	N9 L5b Cdh13	0	0	0	0	C4 L5a Hsd11b1	0.0397744	0.0075188	0
1700021F02Rik	75519	5	RIKEN cDNA 1700021F02 gene	unknown	0	0	N9 L5b Cdh13	0	0	0	0	C11 L6a Sla	0	0	NA
1700021F07Rik	72221	2	RIKEN cDNA 1700021F07 gene	protein-coding	0	0	N9 L5b Cdh13	0	0	0	0	C11 L6a Sla	0	0	NA
1700021G15Rik	73256	10	RIKEN cDNA 1700021G15 gene	ncRNA	0	0	N9 L5b Cdh13	0	0	0	0	C11 L6a Sla	0	0	NA
1700021K19Rik	100502698	16	RUN domain and cysteine-rich domain containing, Beclin 1-interacting protein	protein-coding	1	8	N9 L5b Cdh13	15.6759	0.215584	2	9	C3 L4 Arf5	9.08578	0.174842	0.5603
1700021L23Rik	76410	4	RIKEN cDNA 1700021L23 gene	ncRNA	0	0	N9 L5b Cdh13	0	0.0294118	0	0	C10 L5b Tph2	0.155185	0.0311071	0
1700021N21Rik	69409	4	RIKEN cDNA 1700021N21 gene	ncRNA	0	0	N6 L6a Car12	2.36366	0.0233122	0	0	C8 L5 Chrna6	2.02556	0.128405	0.0863506
1700022A21Rik	72252	5	glycerol-3-phosphate dehydrogenase 1-like pseudogene	pseudo	0	0	N9 L5b Cdh13	0	0	0	0	C11 L6a Sla	0	0	NA
1700022A22Rik	71120	15	RIKEN cDNA 1700022A22 gene	ncRNA	0	0	N9 L5b Cdh13	0	0.0361379	0	0	C11 L6a Sla	0	0.0510589	NA
1700022E09Rik	75636	16	RIKEN cDNA 1700022E09 gene	ncRNA	0	0	N9 L5b Cdh13	0	0	0	0	C11 L6a Sla	0	0	NA
1700022H01Rik	75539	10	RIKEN cDNA 1700022H01 gene	ncRNA	0	0	N11 L6a Sla	10.0738	0.0349885	0	0	C5 L5a Batf3	0.9006	0.175456	0.30955
1700022H16Rik	69420	12	RIKEN cDNA 1700022H16 gene	ncRNA	0	0	N9 L5b Cdh13	0	0.0487805	0	0	C11 L6a Sla	0	0.230769	NA
1700022I11Rik	67317	4	RIKEN cDNA 1700022I11 gene	protein-coding	0	0	N9 L5b Cdh13	0.0297059	0.0294118	0	0	C6 L6a Car12	0.589231	0.0362062	0
1700022N22Rik	69431	17	RIKEN cDNA 1700022N22 gene	ncRNA	0	0	N2 Sst Cbln4	5.96364	0.0806345	0	0	C1 Pvalb Wt1	0.9175	0.117533	0.496737
1700023C21Rik	73257	11	RIKEN cDNA 1700023C21 gene	ncRNA	0	0	N9 L5b Cdh13	0	0	0	0	C7 L6a Mgp	0.0938095	0	0
1700023E05Rik	71868	5	theg spermatid protein like	protein-coding	0	0	N3 L4 Arf5	0.726582	0.0321854	0	0	C10 L5b Tph2	0.671852	0.157097	0.0418718
1700023F02Rik	69433	10	RIKEN cDNA 1700023F02 gene	ncRNA	0	0	N6 L6a Car12	1.66585	0.0243902	0	0	C6 L6a Car12	4.79654	0.230769	0.0688812
1700023F06Rik	69441	11	RIKEN cDNA 1700023F06 gene	protein-coding	0	0	N3 L4 Arf5	6.96038	0.0876084	2	0	C11 L6a Sla	3.88652	0.348369	0.242104
1700023G09Rik	73281	1	RIKEN cDNA 1700023G09 gene	ncRNA	0	0	N9 L5b Cdh13	0	0	0	0	C11 L6a Sla	0	0	NA
1700023L04Rik	76419	6	smal lysine rich protein 1, pseudogene	ncRNA	0	0	N9 L5b Cdh13	0	0.0243902	0	0	C2 Sst Cbln4	0.338696	0.0367868	0
1700024B05Rik	100503856	14	RIKEN cDNA 1700024B05 gene	unknown	0	0	N9 L5b Cdh13	0	0.03125	0	0	C11 L6a Sla	0	0.0292693	NA
1700024B18Rik	69393	14	RIKEN cDNA 1700024B18 gene	ncRNA	0	1	N2 Sst Cbln4	2.96636	0.179487	1	2	C3 L4 Arf5	0.726556	0.230376	0.371055
1700024F13Rik	73270	13	RIKEN cDNA 1700024F13 gene	ncRNA	0	0	N6 L6a Car12	6.56976	0.0664016	0	0	C4 L5a Hsd11b1	1.14158	0.0642461	0.613724
1700024G13Rik	67085	14	RIKEN cDNA 1700024G13 gene	protein-coding	0	0	N9 L5b Cdh13	0	0	0	0	C11 L6a Sla	0	0	NA
1700024I08Rik	75522	13	RIKEN cDNA 1700024I08 gene	ncRNA	0	0	N9 L5b Cdh13	0	0.0228536	0	0	C11 L6a Sla	0	0.0294766	NA
1700024N05Rik	75520	6	RIKEN cDNA 1700024N05 gene	ncRNA	0	0	N9 L5b Cdh13	0	0	0	0	C11 L6a Sla	0	0	NA
1700024P04Rik	69382	13	RIKEN cDNA 1700024P04 gene	protein-coding	0	0	N9 L5b Cdh13	0	0	0	0	C11 L6a Sla	0	0	NA
1700024P16Rik	242594	4	FYN binding protein 2	protein-coding	0	0	N10 L5b Tph2	1.03344	0.183877	0	1	C6 L6a Car12	0.391923	0.305749	0.364483
1700025B11Rik	76409	15	RIKEN cDNA 1700025B11 gene	ncRNA	0	0	N9 L5b Cdh13	0	0	0	0	C11 L6a Sla	0	0	NA
1700025C18Rik	72211	2	RIKEN cDNA 1700025C18 gene	ncRNA	0	0	N9 L5b Cdh13	0	0	0	0	C11 L6a Sla	0	0	NA
1700025D23Rik	100041739	11	RIKEN cDNA 1700025D23 gene	unknown	0	0	N9 L5b Cdh13	0	0	0	0	C11 L6a Sla	0	0	NA
1700025F22Rik	69416	19	RIKEN cDNA 1700025F22 gene	protein-coding	0	0	N9 L5b Cdh13	0	0.03125	0	0	C11 L6a Sla	0	0.0075188	NA
1700025F24Rik	67081	10	RIKEN cDNA 1700025F24 gene	ncRNA	0	0	N1 Pvalb Wt1	0.393143	0.0678498	0	0	C1 Pvalb Wt1	1.05812	0.238643	0.0457741
1700025G04Rik	69399	1	RIKEN cDNA 1700025G04 gene	protein-coding	2	9	N2 Sst Cbln4	5.715	0.137116	2	9	C4 L5a Hsd11b1	8.15925	0.0401364	0.211509
1700025J12Rik	69407	7	RIKEN cDNA 1700025J12 gene	ncRNA	0	0	N5 L5a Batf3	0.481111	0.010101	0	0	C7 L6a Mgp	0.300952	0.047619	0
1700025K24Rik	69418	17	RIKEN cDNA 1700025K24 gene	ncRNA	0	0	N9 L5b Cdh13	0	0.0243902	0	0	C11 L6a Sla	0	0.0356955	NA
1700025M24Rik	72276	5	RIKEN cDNA 1700025M24 gene	ncRNA	0	0	N9 L5b Cdh13	0	0	0	0	C11 L6a Sla	0	0.0384615	NA
1700025N23Rik	69986	6	RIKEN cDNA 1700025N23 gene	ncRNA	0	0	N2 Sst Cbln4	3.10955	0.0383932	0	0	C11 L6a Sla	0	0	0
1700026D08Rik	75556	7	cilia and flagella associated protein 161	protein-coding	0	0	N9 L5b Cdh13	0	0.0452019	0	0	C6 L6a Car12	0.12	0.0332306	0
1700026D11Rik	70371	2	RIKEN cDNA 1700026D11 gene	ncRNA	0	0	N9 L5b Cdh13	0	0.024891	0	0	C11 L6a Sla	0	0.0775173	NA
1700026F02Rik	69419	8	RIKEN cDNA 1700026F02 gene	ncRNA	0	0	N9 L5b Cdh13	0	0.0258407	0	0	C2 Sst Cbln4	0.226957	0.0656428	0
1700026J12Rik	73255	16	RIKEN cDNA 1700026J12 gene	unknown	0	0	N9 L5b Cdh13	0	0	0	0	C2 Sst Cbln4	0.100435	0.0374471	0
1700026J14Rik	69432	6	RIKEN cDNA 1700026J14 gene	ncRNA	0	0	N1 Pvalb Wt1	2.98743	0.104113	0	0	C4 L5a Hsd11b1	0.781053	0.102994	0.408662
1700026L06Rik	69987	2	sperm acrosome associated 9	protein-coding	0	0	N9 L5b Cdh13	0	0.03125	0	0	C2 Sst Cbln4	1.55087	0.0867331	0
1700027A15Rik	69449	1	RIKEN cDNA 1700027A15 gene	ncRNA	0	0	N9 L5b Cdh13	0	0	0	0	C4 L5a Hsd11b1	0.022406	0	0
1700027F06Rik	72268	6	RIKEN cDNA 1700027F06 gene	ncRNA	0	0	N9 L5b Cdh13	0	0	0	0	C11 L6a Sla	0	0	NA
1700027F09Rik	69999	5	RIKEN cDNA 1700027F09 gene	ncRNA	0	0	N9 L5b Cdh13	0	0	0	0	C11 L6a Sla	0	0.0075188	NA
1700027H10Rik	72274	3	RIKEN cDNA 1700027H10 gene	ncRNA	0	0	N7 L6a Mgp	17.6111	0.128813	2	9	C8 L5 Chrna6	6.76556	0.223227	0.408978
1700027I24Rik	75567	9	RIKEN cDNA 1700027I24 gene	ncRNA	0	0	N9 L5b Cdh13	0	0.0200878	0	0	C9 L5b Cdh13	0.0431034	0.0284953	0
1700027J07Rik	69443	10	RIKEN cDNA 1700027J07 gene	ncRNA	0	0	N9 L5b Cdh13	0	0	0	0	C11 L6a Sla	0	0	NA
1700028B04Rik	70001	7	NADH dehydrogenase (ubiquinone) 1 beta subcomplex 8 pseudogene	pseudo	0	0	N9 L5b Cdh13	0	0	0	0	C3 L4 Arf5	0.723111	0.031031	0
1700028D13Rik	75569	5	RIKEN cDNA 1700028D13 gene	ncRNA	0	0	N9 L5b Cdh13	0	0	0	0	C4 L5a Hsd11b1	0.0380451	0.0075188	0
1700028E10Rik	625175	5	RIKEN cDNA 1700028E10 gene	ncRNA	0	0	N4 L5a Hsd11b1	1.28593	0.062247	0	0	C11 L6a Sla	1.71826	0.105067	0.173138
1700028I16Rik	70003	10	RIKEN cDNA 1700028I16 gene	ncRNA	0	0	N9 L5b Cdh13	0	0	0	0	C11 L6a Sla	0	0.0075188	NA
1700028J19Rik	70004	7	RIKEN cDNA 1700028J19 gene	ncRNA	0	0	N1 Pvalb Wt1	6.69314	0.0371133	0	0	C1 Pvalb Wt1	5.71906	0.146458	0.116514
1700028K03Rik	76421	5	RIKEN cDNA 1700028K03 gene	protein-coding	0	2	N11 L6a Sla	19.1744	0.229537	2	9	C11 L6a Sla	5.64391	0.205771	0.726566
1700028M03Rik	69460	3	RIKEN cDNA 1700028M03 gene	ncRNA	0	0	N9 L5b Cdh13	0	0	0	0	C11 L6a Sla	0	0	NA
1700028P14Rik	67483	19	RIKEN cDNA 1700028P14 gene	protein-coding	0	0	N6 L6a Car12	5.14732	0.0861258	0	1	C6 L6a Car12	6.16115	0.352136	0.184958
1700028P15Rik	75655	2	RIKEN cDNA 1700028P15 gene	ncRNA	0	0	N9 L5b Cdh13	0	0	0	0	C11 L6a Sla	0	0	NA
1700029B22Rik	69495	7	RIKEN cDNA 1700029B22 gene	ncRNA	0	0	N9 L5b Cdh13	0	0	0	0	C11 L6a Sla	0	0	NA
1700029F12Rik	66479	13	RIKEN cDNA 1700029F12 gene	protein-coding	0	0	N1 Pvalb Wt1	0.0225714	0.0169492	0	0	C11 L6a Sla	0	0.040575	0
1700029H14Rik	66501	8	RIKEN cDNA 1700029H14 gene	protein-coding	0	0	N4 L5a Hsd11b1	0.0737288	0.0532201	0	0	C5 L5a Batf3	0.0142	0.0338662	0.298809
1700029I15Rik	75641	2	RIKEN cDNA 1700029I15 gene	protein-coding	0	0	N6 L6a Car12	25.0017	0.0767524	0	0	C4 L5a Hsd11b1	4.92947	0.120294	0.77033
1700029J03Rik	72264	16	RIKEN cDNA 1700029J03 gene	ncRNA	0	0	N9 L5b Cdh13	0	0.0243902	0	0	C11 L6a Sla	0	0.0307646	NA
1700029J07Rik	69479	8	RIKEN cDNA 1700029J07 gene	protein-coding	0	0	N6 L6a Car12	15.5734	0.140669	0	2	C11 L6a Sla	4.27652	0.242406	0.694577
1700029M03Rik	69476	1	RIKEN cDNA 1700029M03 gene	unknown	0	0	N9 L5b Cdh13	0	0	0	0	C11 L6a Sla	0	0	NA
1700029M20Rik	73937	4	RIKEN cDNA 1700029M20 gene	ncRNA	0	0	N9 L5b Cdh13	0	0	0	0	C11 L6a Sla	0	0	NA
1700029N11Rik	69491	13	RIKEN cDNA 1700029N11 gene	ncRNA	0	0	N9 L5b Cdh13	0	0	0	0	C11 L6a Sla	0	0	NA
1700029P11Rik	66346	15	RIKEN cDNA 1700029P11 gene	protein-coding	0	0	N9 L5b Cdh13	0	0	0	0	C11 L6a Sla	0	0	NA
1700030A11Rik	74179	17	RIKEN cDNA 1700030A11 gene	ncRNA	0	0	N4 L5a Hsd11b1	0.172881	0.0169492	0	0	C6 L6a Car12	0.0842308	0.0384615	0
1700030C10Rik	69513	12	RIKEN cDNA 1700030C10 gene	ncRNA	0	0	N4 L5a Hsd11b1	6.34407	0.0408696	0	0	C3 L4 Arf5	0.762667	0.0483865	0.466984
1700030C14Rik	75662	2	RIKEN cDNA 1700030C14 gene	ncRNA	0	0	N4 L5a Hsd11b1	3.61508	0.0169492	0	0	C9 L5b Cdh13	0.538621	0.0900754	0
1700030E10Rik	69515	10	RIKEN cDNA 1700030E10 gene	ncRNA	0	0	N9 L5b Cdh13	0	0	0	0	C5 L5a Batf3	0.0258	0.0165812	0
1700030F04Rik	72263	6	RIKEN cDNA 1700030F04 gene	ncRNA	0	0	N9 L5b Cdh13	0	0.0946464	0	0	C9 L5b Cdh13	0.237931	0.222085	0
1700030F18Rik	72277	15	RIKEN cDNA 1700030F18 gene	protein-coding	2	9	N9 L5b Cdh13	0	0.154053	2	9	C11 L6a Sla	0.0804348	0.0955961	0
1700030J22Rik	69528	8	RIKEN cDNA 1700030J22 gene	protein-coding	0	0	N8 L5 Chrna6	6.12091	0.124023	0	4	C9 L5b Cdh13	3.76448	0.413728	0.120326
1700030K09Rik	72254	8	RIKEN cDNA 1700030K09 gene	protein-coding	0	1	N3 L4 Arf5	10.8424	0.120611	2	8	C11 L6a Sla	9.69739	0.178617	0.443503
1700030L20Rik	70055	3	RIKEN cDNA 1700030L20 gene	ncRNA	0	0	N9 L5b Cdh13	0	0	0	0	C11 L6a Sla	0	0	NA
1700030L22Rik	75576	12	RIKEN cDNA 1700030L22 gene	ncRNA	0	0	N2 Sst Cbln4	4.71545	0.178615	0	0	C2 Sst Cbln4	0.443913	0.133832	0.952481
1700030M09Rik	72259	8	RIKEN cDNA 1700030M09 gene	ncRNA	0	0	N9 L5b Cdh13	0	0.0454545	0	0	C11 L6a Sla	0	0	NA
1700030N03Rik	70011	19	RIKEN cDNA 1700030N03 gene	ncRNA	0	0	N9 L5b Cdh13	0	0.0240135	0	0	C11 L6a Sla	0	0.0325873	NA
1700030O20Rik	72286	10	RIKEN cDNA 1700030O20 gene	ncRNA	0	0	N9 L5b Cdh13	0	0	0	0	C11 L6a Sla	0	0	NA
1700031A10Rik	73286	17	RIKEN cDNA 1700031A10 gene	ncRNA	0	0	N11 L6a Sla	1.11344	0.0365156	0	0	C11 L6a Sla	0.303043	0.0316916	0.853258
1700031L13Rik	67327	5	RIKEN cDNA 1700031L13 gene	ncRNA	0	0	N9 L5b Cdh13	0	0	0	0	C11 L6a Sla	0	0	NA
1700031M16Rik	73302	15	RIKEN cDNA 1700031M16 gene	ncRNA	0	0	N9 L5b Cdh13	0	0.0571429	0	0	C11 L6a Sla	0	0.0814311	NA
1700031P21Rik	73278	12	RIKEN cDNA 1700031P21 gene	ncRNA	0	0	N9 L5b Cdh13	0	0.0375464	0	0	C5 L5a Batf3	0.4596	0.0309644	0
1700034B16Rik	73282	18	RIKEN cDNA 1700034B16 gene	ncRNA	0	0	N9 L5b Cdh13	0	0	0	0	C11 L6a Sla	0	0	NA
1700034E13Rik	78414	18	RIKEN cDNA 1700034E13 gene	protein-coding	0	0	N9 L5b Cdh13	0	0	0	0	C11 L6a Sla	0	0	NA
1700034G24Rik	67325	5	RIKEN cDNA 1700034G24 gene	ncRNA	0	0	N9 L5b Cdh13	5.32647	0.109173	0	0	C7 L6a Mgp	1.87095	0.277675	0.458474
1700034H15Rik	98736	1	RIKEN cDNA 1700034H15 gene	ncRNA	0	0	N8 L5 Chrna6	4.88818	0.120271	0	1	C8 L5 Chrna6	1.39444	0.291633	0.618322
1700034I23Rik	73297	3	FUN14 domain containing 2 pseudogene	pseudo	0	0	N7 L6a Mgp	7.31526	0.1136	0	0	C6 L6a Car12	0.825	0.131153	0.617854
1700034J05Rik	73344	6	RIKEN cDNA 1700034J05 gene	protein-coding	0	0	N7 L6a Mgp	5.49368	0.0572914	0	0	C3 L4 Arf5	0.379556	0.0338336	0.737733
1700034K08Rik	78349	9	RIKEN cDNA 1700034K08 gene	ncRNA	0	0	N9 L5b Cdh13	0	0	0	0	C11 L6a Sla	0	0.047619	NA
1700034O15Rik	76606	6	LLLL and CFNLAS motif containing 1	protein-coding	0	0	N9 L5b Cdh13	0	0	0	0	C9 L5b Cdh13	0.0255172	0	0
1700034P13Rik	73331	1	RIKEN cDNA 1700034P13 gene	ncRNA	2	4	N8 L5 Chrna6	4.07909	0.282883	2	9	C10 L5b Tph2	3.80037	0.229102	0.179302
1700036G14Rik	73283	3	RIKEN cDNA 1700036G14 gene	ncRNA	0	0	N3 L4 Arf5	2.57291	0.0390006	0	0	C11 L6a Sla	0	0.0291757	0
1700037C18Rik	73261	16	RIKEN cDNA 1700037C18 gene	protein-coding	0	0	N4 L5a Hsd11b1	6.67814	0.0853594	1	3	C10 L5b Tph2	9.51963	0.376093	0.157257
1700037H04Rik	67326	2	RIKEN cDNA 1700037H04 gene	protein-coding	0	1	N9 L5b Cdh13	37.4015	0.247379	2	9	C9 L5b Cdh13	128.68	0.264877	0.0693991
1700039E15Rik	76713	7	solute carrier family 6 member 21	protein-coding	0	0	N4 L5a Hsd11b1	0.945932	0.0169492	0	0	C3 L4 Arf5	0.496667	0.042579	0
1700039E22Rik	73322	19	RIKEN cDNA 1700039E22 gene	ncRNA	0	0	N9 L5b Cdh13	0	0	0	0	C11 L6a Sla	0	0	NA
1700039I01Rik	73346	1	RIKEN cDNA 1700039I01 gene	ncRNA	0	0	N9 L5b Cdh13	0	0	0	0	C11 L6a Sla	0	0	NA
1700039M10Rik	67518	14	RIKEN cDNA 1700039M10 gene	unknown	0	0	N10 L5b Tph2	3.48781	0.0364159	0	0	C10 L5b Tph2	0.840741	0.191733	0.511524
1700040D17Rik	76602	3	RIKEN cDNA 1700040D17 gene	unknown	0	0	N4 L5a Hsd11b1	8.38797	0.0476994	0	0	C3 L4 Arf5	3.57589	0.175232	0.261033
1700040L02Rik	73287	10	ciliary associated calcium binding coiled-coil 1	protein-coding	0	0	N11 L6a Sla	3.44219	0.133194	0	0	C11 L6a Sla	6.1	0.152543	0.125212
1700041A01Rik	73312	5	RIKEN cDNA 1700041A01 gene	ncRNA	0	0	N9 L5b Cdh13	0	0.0294118	0	0	C11 L6a Sla	0	0.0294766	NA
1700041B01Rik	78623	15	RIKEN cDNA 1700041B01 gene	unknown	0	0	N5 L5a Batf3	1.24162	0.0602193	0	0	C5 L5a Batf3	0.3994	0.0831003	0.391241
1700041C23Rik	67319	9	RIKEN cDNA 1700041C23 gene	ncRNA	0	0	N9 L5b Cdh13	0	0.0199452	0	0	C4 L5a Hsd11b1	0.053985	0.009534	0
1700041M19Rik	76601	16	RIKEN cDNA 1700041M19 gene	ncRNA	0	0	N9 L5b Cdh13	0	0.0285714	0	0	C11 L6a Sla	0	0	NA
1700042G07Rik	67323	4	RIKEN cDNA 1700042G07 gene	protein-coding	0	0	N9 L5b Cdh13	0	0	0	0	C5 L5a Batf3	0.1434	0.0416349	0
1700042G15Rik	73349	4	RIKEN cDNA 1700042G15 gene	ncRNA	0	0	N9 L5b Cdh13	0	0.03125	0	0	C11 L6a Sla	0	0	NA
1700042O10Rik	73321	11	RIKEN cDNA 1700042O10 gene	ncRNA	0	0	N9 L5b Cdh13	0	0	0	0	C11 L6a Sla	0	0	NA
1700044C05Rik	73306	14	RIKEN cDNA 1700044C05 gene	ncRNA	0	0	N9 L5b Cdh13	0	0	0	0	C11 L6a Sla	0	0	NA
1700044K03Rik	67321	18	RIKEN cDNA 1700044K03 gene	ncRNA	0	0	N9 L5b Cdh13	0	0	0	0	C11 L6a Sla	0	0	NA
1700045H11Rik	73348	4	RIKEN cDNA 1700045H11 gene	ncRNA	0	0	N9 L5b Cdh13	0	0.0169492	0	0	C7 L6a Mgp	0.195238	0.10495	0
1700046C09Rik	73307	11	RIKEN cDNA 1700046C09 gene	ncRNA	0	0	N9 L5b Cdh13	0	0	0	0	C11 L6a Sla	0	0	NA
1700047A11Rik	76604	8	RIKEN cDNA 1700047A11 gene	ncRNA	1	6	N7 L6a Mgp	10.1016	0.223394	2	9	C2 Sst Cbln4	4.93087	0.130184	0.52224
1700047E10Rik	74328	14	RIKEN cDNA 1700047E10 gene	ncRNA	0	0	N11 L6a Sla	0.046875	0.0240481	0	0	C3 L4 Arf5	0.0174444	0.0075188	0
1700047G03Rik	73339	15	RIKEN cDNA 1700047G03 gene	ncRNA	0	0	N4 L5a Hsd11b1	0.0976271	0.0169492	0	0	C8 L5 Chrna6	0.221111	0.0775746	0.0942135
1700047I17Rik2	100101807	12	RIKEN cDNA 1700047I17 gene 2	protein-coding	0	0	N2 Sst Cbln4	0.0259091	0.010101	0	0	C7 L6a Mgp	0.06	0.0391134	0.0849305
1700047L14Rik	73295	5	RIKEN cDNA 1700047L14 gene	ncRNA	0	0	N9 L5b Cdh13	0	0	0	0	C11 L6a Sla	0	0	NA
1700047M11Rik	67330	1	RIKEN cDNA 1700047M11 gene	ncRNA	0	0	N9 L5b Cdh13	6.26735	0.051814	0	0	C4 L5a Hsd11b1	0.0159398	0	0
1700048B10Rik	73465	13	RIKEN cDNA 1700048B10 gene	ncRNA	0	0	N9 L5b Cdh13	0	0.0625	0	0	C11 L6a Sla	0	0.0075188	NA
1700048F04Rik	73396	5	RIKEN cDNA 1700048F04 gene	ncRNA	0	0	N9 L5b Cdh13	0	0.0588235	0	0	C9 L5b Cdh13	1.90034	0.113118	0
1700048M11Rik	100503166	16	RIKEN cDNA 1700048M11 gene	ncRNA	0	0	N2 Sst Cbln4	3.625	0.0634565	0	0	C4 L5a Hsd11b1	1.39586	0.0725595	0.672545
1700048O14Rik	73433	19	RIKEN cDNA 1700048O14 gene	ncRNA	0	0	N9 L5b Cdh13	0	0	0	0	C11 L6a Sla	0	0	NA
1700048O20Rik	69430	9	RIKEN cDNA 1700048O20 gene	ncRNA	0	0	N5 L5a Batf3	17.9098	0.0831696	0	3	C11 L6a Sla	12.5996	0.192911	0.335471
1700049E15Rik	100039727	6	RIKEN cDNA 1700049E15 gene	ncRNA	0	0	N9 L5b Cdh13	0	0	0	0	C11 L6a Sla	0	0	NA
1700049E17Rik1	666214	14	RIKEN cDNA 1700049E17 gene, gene 1	unknown	0	0	N9 L5b Cdh13	0	0	0	0	C11 L6a Sla	0	0	NA
1700049E17Rik2	100041722	14	tandem duplication of RIKEN cDNA 1700049E17 gene, gene 2	unknown	0	0	N9 L5b Cdh13	0	0	0	0	C11 L6a Sla	0	0	NA
1700049E22Rik	73395	6	RIKEN cDNA 1700049E22 gene	ncRNA	0	0	N9 L5b Cdh13	0	0	0	0	C11 L6a Sla	0	0	NA
1700049G17Rik	73430	7	zinc finger protein 974	protein-coding	0	0	N6 L6a Car12	8.07902	0.187546	1	3	C4 L5a Hsd11b1	2.36293	0.255727	0.554216
1700049J03Rik	73365	17	RIKEN cDNA 1700049J03 gene	ncRNA	0	0	N9 L5b Cdh13	5.58147	0.0628053	0	0	C7 L6a Mgp	0.975714	0.221823	0.0828153
1700049L16Rik	108950	10	hematological and neurological expressed 1-like pseudogene	pseudo	0	0	N9 L5b Cdh13	0	0	0	0	C11 L6a Sla	0	0	NA
1700051A21Rik	73366	11	RIKEN cDNA 1700051A21 gene	ncRNA	0	0	N5 L5a Batf3	1.92374	0.0478577	0	0	C3 L4 Arf5	1.09078	0.097595	0.448515
1700052H01Rik	73462	3	RIKEN cDNA 1700052H01 gene	unknown	0	0	N11 L6a Sla	0.134063	0.173123	0	0	C4 L5a Hsd11b1	0.0281955	0.0689898	0
1700052I22Rik	67340	12	RIKEN cDNA 1700052I22 gene	ncRNA	0	0	N9 L5b Cdh13	0	0	0	0	C11 L6a Sla	0	0	NA
1700052K11Rik	73431	11	RIKEN cDNA 1700052K11 gene	ncRNA	0	0	N5 L5a Batf3	4.84091	0.0492692	0	0	C6 L6a Car12	3.47115	0.187962	0.226729
1700052N19Rik	73419	10	acidic residue methyltransferase 1	protein-coding	0	0	N11 L6a Sla	12.2372	0.14287	2	7	C1 Pvalb Wt1	9.45312	0.238593	0.147844
1700054A03Rik	78457	19	RIKEN cDNA 1700054A03 gene	ncRNA	0	0	N9 L5b Cdh13	0	0	0	0	C5 L5a Batf3	0.301	0.107147	0
1700054K19Rik	67336	6	RIKEN cDNA 1700054K19 gene	ncRNA	0	0	N9 L5b Cdh13	0	0	0	0	C11 L6a Sla	0	0	NA
1700054M17Rik	73358	2	RIKEN cDNA 1700054M17 gene	ncRNA	0	0	N10 L5b Tph2	10.9866	0.0774584	0	0	C1 Pvalb Wt1	1.30969	0.117908	0.193598
1700054O19Rik	74272	14	RIKEN cDNA 1700054O19 gene	unknown	0	0	N4 L5a Hsd11b1	0.00881356	0	0	0	C4 L5a Hsd11b1	0.0408271	0.0318818	0.055576
1700055C04Rik	73397	9	RIKEN cDNA 1700055C04 gene	ncRNA	0	0	N9 L5b Cdh13	0	0	0	0	C11 L6a Sla	0	0	NA
1700055D18Rik	73405	4	RIKEN cDNA 1700055D18 gene	unknown	0	0	N1 Pvalb Wt1	8.94543	0.0697458	0	0	C8 L5 Chrna6	2.83556	0.11478	0.339431
1700055N04Rik	73458	19	aldehyde dehydrogenase 3 family, member B3	protein-coding	0	0	N9 L5b Cdh13	0	0.0126582	0	0	C5 L5a Batf3	0.007	0.02	0
1700056E22Rik	73363	1	RIKEN cDNA 1700056E22 gene	protein-coding	0	0	N1 Pvalb Wt1	0.0417143	0	0	0	C2 Sst Cbln4	0.34087	0.101101	0.0135336
1700057G04Rik	78459	9	RIKEN cDNA 1700057G04 gene	protein-coding	0	0	N9 L5b Cdh13	0	0	0	0	C11 L6a Sla	0	0.0075188	NA
1700057H15Rik	78460	4	RIKEN cDNA 1700057H15 gene	ncRNA	0	0	N10 L5b Tph2	0.0484375	0.03125	0	0	C11 L6a Sla	0	0	0
1700057H21Rik	73375	2	RIKEN cDNA 1700057H21 gene	ncRNA	0	0	N9 L5b Cdh13	0	0.0379747	0	0	C4 L5a Hsd11b1	0.0153383	0.0223723	0
1700058M13Rik	73423	13	RIKEN cDNA 1700058M13 gene	ncRNA	0	0	N11 L6a Sla	1.91813	0.0315507	0	0	C9 L5b Cdh13	0.17931	0.065778	0.113676
1700060C16Rik	73425	6	RIKEN cDNA 1700060C16 gene	ncRNA	0	0	N9 L5b Cdh13	0	0	0	0	C11 L6a Sla	0	0.0344828	NA
1700060C20Rik	73399	2	RIKEN cDNA 1700060C20 gene	ncRNA	0	0	N9 L5b Cdh13	0	0	0	0	C10 L5b Tph2	0.15037	0.037037	0
1700060L04Rik	73378	6	RIKEN cDNA 1700060L04 gene	ncRNA	0	0	N9 L5b Cdh13	0	0	0	0	C11 L6a Sla	0	0	NA
1700060O08Rik	67335	12	RIKEN cDNA 1700060O08 gene	unknown	0	0	N1 Pvalb Wt1	0.0551429	0.0285714	0	0	C2 Sst Cbln4	0.37	0.18949	0.0178147
1700061F12Rik	73438	2	RIKEN cDNA 1700061F12 gene	ncRNA	0	0	N9 L5b Cdh13	0	0	0	0	C11 L6a Sla	0	0	NA
1700061G19Rik	78625	17	RIKEN cDNA 1700061G19 gene	protein-coding	0	0	N11 L6a Sla	1.38406	0.0615845	0	0	C5 L5a Batf3	0.1764	0.0899986	0.217045
1700061I17Rik	433646	3	RIKEN cDNA 1700061I17 gene	ncRNA	0	0	N9 L5b Cdh13	0	0.0338983	0	0	C11 L6a Sla	0	0.0831591	NA
1700061J23Rik	76993	11	RIKEN cDNA 1700061J23 gene	ncRNA	0	0	N9 L5b Cdh13	0	0	0	0	C4 L5a Hsd11b1	0.162857	0.0075188	0
1700062C10Rik	73440	14	RIKEN cDNA 1700062C10 gene	unknown	0	0	N9 L5b Cdh13	0	0.0200878	0	0	C11 L6a Sla	0	0	NA
1700063A18Rik	73454	1	RIKEN cDNA 1700063A18 gene	ncRNA	0	0	N9 L5b Cdh13	0	0	0	0	C11 L6a Sla	0	0	NA
1700063D05Rik	78500	9	RIKEN cDNA 1700063D05 gene	ncRNA	0	0	N9 L5b Cdh13	0	0.0231712	0	0	C11 L6a Sla	0	0.120944	NA
1700063H04Rik	74269	6	RIKEN cDNA 1700063H04 gene	unknown	0	0	N9 L5b Cdh13	0	0	0	0	C11 L6a Sla	0	0	NA
1700063O14Rik	73452	5	RIKEN cDNA 1700063O14 gene	ncRNA	0	0	N10 L5b Tph2	1.65562	0.0625	0	0	C10 L5b Tph2	0.336667	0.0740741	0.61413
1700064F23Rik	73437	8	RIKEN cDNA 1700064F23 gene	ncRNA	0	0	N3 L4 Arf5	1.28506	0.0126582	0	0	C11 L6a Sla	0	0	0
1700064J06Rik	73400	10	RIKEN cDNA 1700064J06 gene	ncRNA	0	0	N9 L5b Cdh13	0	0	0	0	C11 L6a Sla	0	0	NA
1700064M15Rik	73457	12	RIKEN cDNA 1700064M15 gene	ncRNA	0	0	N1 Pvalb Wt1	0.942857	0.0268837	0	0	C11 L6a Sla	2.14957	0.0431582	0.0564307
1700065D16Rik	73410	9	RIKEN cDNA 1700065D16 gene	protein-coding	0	0	N11 L6a Sla	3.95219	0.0863222	0	0	C11 L6a Sla	1.11696	0.120466	0.768723
1700065I16Rik	78462	15	gasdermin pseudogene	pseudo	0	0	N9 L5b Cdh13	0	0	0	0	C11 L6a Sla	0	0	NA
1700065J11Rik	73409	6	RIKEN cDNA 1700065J11 gene	ncRNA	0	0	N9 L5b Cdh13	0	0	0	0	C11 L6a Sla	0	0	NA
1700065J18Rik	73455	1	RIKEN cDNA 1700065J18 gene	ncRNA	0	0	N1 Pvalb Wt1	3.74257	0.0289524	0	0	C2 Sst Cbln4	1.49565	0.0633351	0.0413293
1700065L07Rik	73408	6	RIKEN cDNA 1700065L07 gene	ncRNA	0	0	N9 L5b Cdh13	0	0.03125	0	0	C8 L5 Chrna6	0.452222	0.0846332	0
1700065O20Rik	76609	18	RIKEN cDNA 1700065O20 gene	ncRNA	0	0	N9 L5b Cdh13	0	0	0	0	C11 L6a Sla	0	0	NA
1700066B17Rik	73426	1	RIKEN cDNA 1700066B17 gene	ncRNA	0	0	N9 L5b Cdh13	0	0	0	0	C11 L6a Sla	0	0	NA
1700066B19Rik	73449	18	RIKEN cDNA 1700066B19 gene	protein-coding	0	0	N2 Sst Cbln4	1.09455	0.0354397	0	0	C11 L6a Sla	0	0	0
1700066C05Rik	78654	16	RIKEN cDNA 1700066C05 gene	protein-coding	0	0	N9 L5b Cdh13	0	0	0	0	C11 L6a Sla	0	0	NA
1700066J03Rik	67339	13	RIKEN cDNA 1700066J03 gene	ncRNA	0	0	N10 L5b Tph2	0.175937	0.0421431	0	0	C7 L6a Mgp	0.438571	0.105772	0.0333288
1700066N21Rik	73471	5	RIKEN cDNA 1700066N21 gene	ncRNA	0	0	N9 L5b Cdh13	0	0	0	0	C11 L6a Sla	0	0	NA
1700066O22Rik	74916	18	RIKEN cDNA 1700066O22 gene	ncRNA	0	0	N9 L5b Cdh13	0	0.0358257	0	0	C9 L5b Cdh13	0.213103	0.200888	0
1700067G17Rik	73475	1	RIKEN cDNA 1700067G17 gene	ncRNA	0	0	N9 L5b Cdh13	0.773824	0.0294118	0	0	C9 L5b Cdh13	0.50931	0.0344828	0.279026
1700067K01Rik	73453	8	RIKEN cDNA 1700067K01 gene	protein-coding	0	0	N5 L5a Batf3	1.75091	0.0813845	1	0	C1 Pvalb Wt1	1.22469	0.194291	0.285904
1700067P10Rik	68224	17	RIKEN cDNA 1700067P10 gene	protein-coding	0	0	N9 L5b Cdh13	0	0	0	0	C10 L5b Tph2	0.250741	0.037037	0
1700069L16Rik	381707	5	RIKEN cDNA 1700069L16 gene	ncRNA	0	0	N9 L5b Cdh13	0	0.03125	0	0	C4 L5a Hsd11b1	0.458195	0.0252577	0
1700069P05Rik	73531	6	RIKEN cDNA 1700069P05 gene	ncRNA	0	0	N9 L5b Cdh13	0	0	0	0	C11 L6a Sla	0	0	NA
1700071G01Rik	73485	5	RIKEN cDNA 1700071G01 gene	unknown	0	0	N3 L4 Arf5	0.42	0.0253165	0	0	C3 L4 Arf5	0.0266667	0.0111111	0.588624
1700071M16Rik	73504	17	RIKEN cDNA 1700071M16 gene	ncRNA	0	0	N2 Sst Cbln4	6.41364	0.184971	1	0	C1 Pvalb Wt1	2.27312	0.551205	0.327004
1700072B07Rik	73529	9	RIKEN cDNA 1700072B07 gene	ncRNA	0	0	N9 L5b Cdh13	0	0	0	0	C11 L6a Sla	0	0	NA
1700072I22Rik	78629	11	RIKEN cDNA 1700072I22 gene	ncRNA	0	0	N9 L5b Cdh13	0	0.0298161	0	0	C6 L6a Car12	0.0226923	0.0971395	0
1700072O05Rik	73505	6	RIKEN cDNA 1700072O05 gene	ncRNA	0	0	N9 L5b Cdh13	0	0.0258185	0	0	C11 L6a Sla	0	0.0150376	NA
1700073E17Rik	381827	6	ribosomal protein L7 pseudogene	pseudo	0	0	N9 L5b Cdh13	0	0	0	0	C10 L5b Tph2	0.0303704	0.037037	0
1700074H08Rik	73480	13	RIKEN cDNA 1700074H08 gene	ncRNA	0	0	N7 L6a Mgp	5.56211	0.048784	0	0	C4 L5a Hsd11b1	0.824662	0.0649829	0.774624
1700074P13Rik	73481	6	RIKEN cDNA 1700074P13 gene	protein-coding	0	0	N9 L5b Cdh13	0	0	0	0	C11 L6a Sla	0	0	NA
1700080E11Rik	73532	9	RIKEN cDNA 1700080E11 gene	protein-coding	0	0	N9 L5b Cdh13	0	0	0	0	C11 L6a Sla	0	0	NA
1700080G11Rik	73488	4	RIKEN cDNA 1700080G11 gene	ncRNA	0	0	N6 L6a Car12	2.18854	0.0243902	0	0	C6 L6a Car12	1.46692	0.269145	0.265379
1700080G18Rik	73533	6	RIKEN cDNA 1700080G18 gene	protein-coding	0	0	N7 L6a Mgp	4.30474	0.0741295	0	0	C3 L4 Arf5	1.50044	0.175442	0.656786
1700080N15Rik	73489	2	RIKEN cDNA 1700080N15 gene	ncRNA	2	5	N8 L5 Chrna6	16.9927	0.359554	2	8	C3 L4 Arf5	5.369	0.249495	0.668916
1700081B01Rik	73500	5	RIKEN cDNA 1700081B01 gene	ncRNA	0	0	N2 Sst Cbln4	1.82727	0.107601	0	0	C7 L6a Mgp	0.316667	0.0833887	0
1700081H04Rik	73477	5	RIKEN cDNA 1700081H04 gene	ncRNA	0	0	N9 L5b Cdh13	0	0	0	0	C11 L6a Sla	0	0	NA
1700083H02Rik	67348	12	RIKEN cDNA 1700083H02 gene	ncRNA	0	0	N9 L5b Cdh13	0	0	0	0	C11 L6a Sla	0	0	NA
1700084C01Rik	78465	1	coiled-coil domain containing 190	protein-coding	0	0	N6 L6a Car12	0.96878	0.0398904	0	0	C7 L6a Mgp	1.02048	0.0972193	0.0914758
1700084D21Rik	76720	13	RIKEN cDNA 1700084D21 gene	ncRNA	0	0	N9 L5b Cdh13	0	0	0	0	C11 L6a Sla	0	0	NA
1700084E18Rik	67350	2	RIKEN cDNA 1700084E18 gene	ncRNA	0	0	N11 L6a Sla	4.10844	0.0298758	0	0	C1 Pvalb Wt1	1.10531	0.0878964	0.25659
1700084F23Rik	74280	13	RIKEN cDNA 1700084F23 gene	ncRNA	0	0	N9 L5b Cdh13	0	0.0454545	0	0	C11 L6a Sla	0	0.050602	NA
1700084J12Rik	73486	15	ribosomal protein L7-like 1 pseudogene	pseudo	0	0	N9 L5b Cdh13	0	0	0	0	C10 L5b Tph2	0.0359259	0.02	0
1700085C21Rik	74283	12	RIKEN cDNA 1700085C21 gene	ncRNA	0	0	N5 L5a Batf3	1.85838	0.0792471	0	0	C9 L5b Cdh13	1.25138	0.128445	0.0951648
1700086D15Rik	74282	11	RIKEN cDNA 1700086D15 gene	ncRNA	0	0	N11 L6a Sla	4.50125	0.0227362	0	0	C3 L4 Arf5	2.80144	0.0796406	0.525141
1700086L19Rik	74284	12	RIKEN cDNA 1700086L19 gene	ncRNA	0	1	N8 L5 Chrna6	32.2782	0.271331	2	9	C11 L6a Sla	90.94	0.207325	0.101887
1700086O06Rik	73516	18	RIKEN cDNA 1700086O06 gene	ncRNA	0	0	N5 L5a Batf3	8.14455	0.123706	2	5	C11 L6a Sla	4.71304	0.298344	0.388974
1700086P04Rik	67349	4	RIKEN cDNA 1700086P04 gene	unknown	0	0	N3 L4 Arf5	5.11304	0.031612	0	0	C3 L4 Arf5	0.487222	0.0582638	0.298153
1700087I21Rik	76619	14	RIKEN cDNA 1700087I21 gene	ncRNA	0	0	N9 L5b Cdh13	8.66118	0.0904036	0	0	C11 L6a Sla	1.29261	0.0783711	0.392086
1700087M22Rik	78467	14	RIKEN cDNA 1700087M22 gene	ncRNA	0	0	N2 Sst Cbln4	9.48909	0.0643638	0	0	C5 L5a Batf3	4.505	0.134105	0.281642
1700088E04Rik	27660	15	RIKEN cDNA 1700088E04 gene	protein-coding	0	0	N1 Pvalb Wt1	12.5717	0.208719	2	5	C10 L5b Tph2	6.96407	0.332492	0.235158
1700091H14Rik	73553	14	RIKEN cDNA 1700091H14 gene	ncRNA	0	0	N9 L5b Cdh13	0	0	0	0	C11 L6a Sla	0	0	NA
1700092C02Rik	67357	8	RIKEN cDNA 1700092C02 gene	ncRNA	0	0	N9 L5b Cdh13	0	0	0	0	C11 L6a Sla	0	0	NA
1700092C10Rik	73554	14	RIKEN cDNA 1700092C10 gene	ncRNA	0	0	N9 L5b Cdh13	0	0	0	0	C11 L6a Sla	0	0	NA
1700092E19Rik	73576	13	RIKEN cDNA 1700092E19 gene	ncRNA	0	0	N9 L5b Cdh13	0	0	0	0	C11 L6a Sla	0	0	NA
1700092K14Rik	73536	11	RIKEN cDNA 1700092K14 gene	ncRNA	0	0	N9 L5b Cdh13	1.82882	0.0238213	0	0	C10 L5b Tph2	1.09444	0.0653008	0.146273
1700092M07Rik	74307	19	RIKEN cDNA 1700092M07 gene	protein-coding	0	0	N3 L4 Arf5	1.10848	0.0126582	0	0	C6 L6a Car12	0.302692	0.0321125	0
1700093K21Rik	67358	11	RIKEN cDNA 1700093K21 gene	protein-coding	0	0	N6 L6a Car12	1.30976	0.059108	0	0	C3 L4 Arf5	0.112778	0.0368915	0.360751
1700094D03Rik	73545	3	RIKEN cDNA 1700094D03 gene	protein-coding	0	0	N11 L6a Sla	16.2516	0.147372	0	0	C4 L5a Hsd11b1	5.35451	0.155598	0.617591
1700094J05Rik	67523	10	RIKEN cDNA 1700094J05 gene	ncRNA	0	0	N11 L6a Sla	0.987187	0.120006	0	0	C4 L5a Hsd11b1	0.928647	0.137598	0.324075
1700094M23Rik	73579	3	RIKEN cDNA 1700094M23 gene	ncRNA	0	0	N7 L6a Mgp	1.98421	0.115049	0	0	C3 L4 Arf5	0.398222	0.0880009	0.735049
1700094M24Rik	74304	6	RIKEN cDNA 1700094M24 gene	ncRNA	0	0	N9 L5b Cdh13	0	0	0	0	C11 L6a Sla	0	0	NA
1700095A13Rik	76995	18	RIKEN cDNA 1700095A13 gene	unknown	0	0	N9 L5b Cdh13	0	0	0	0	C11 L6a Sla	0	0.02	NA
1700095A21Rik	67524	4	RIKEN cDNA 1700095A21 gene	ncRNA	0	0	N9 L5b Cdh13	0	0	0	0	C11 L6a Sla	0	0	NA
1700095B10Rik	67360	5	RIKEN cDNA 1700095B10 gene	ncRNA	0	0	N9 L5b Cdh13	0	0	0	0	C11 L6a Sla	0	0.0075188	NA
1700095J12Rik	73563	4	RIKEN cDNA 1700095J12 gene	ncRNA	0	0	N4 L5a Hsd11b1	2.38508	0.0736961	0	0	C3 L4 Arf5	1.73633	0.0532839	0.347543
1700096J18Rik	67927	11	RIKEN cDNA 1700096J18 gene	ncRNA	0	0	N9 L5b Cdh13	0	0.0169492	0	0	C2 Sst Cbln4	0.584348	0.0805322	0
1700096K18Rik	73571	5	RIKEN cDNA 1700096K18 gene	ncRNA	0	0	N7 L6a Mgp	6.34632	0.09968	0	0	C11 L6a Sla	3.56826	0.199027	0.323535
1700096P03Rik	73557	8	RIKEN cDNA 1700096P03 gene	ncRNA	0	0	N9 L5b Cdh13	0	0	0	0	C11 L6a Sla	0	0	NA
1700097N02Rik	67522	17	RIKEN cDNA 1700097N02 gene	ncRNA	0	0	N9 L5b Cdh13	0	0	0	0	C11 L6a Sla	0	0.047619	NA
1700099I09Rik	76624	13	RIKEN cDNA 1700099I09 gene	ncRNA	0	0	N6 L6a Car12	1.93732	0.0443216	0	0	C4 L5a Hsd11b1	0.547594	0.0539765	0.583971
1700100I10Rik	74982	14	RIKEN cDNA 1700100I10 gene	ncRNA	0	0	N9 L5b Cdh13	0	0	0	0	C11 L6a Sla	0	0	NA
1700100L14Rik	73584	13	RIKEN cDNA 1700100L14 gene	ncRNA	0	0	N3 L4 Arf5	4.51595	0.0314204	0	0	C4 L5a Hsd11b1	0.471729	0.0328366	0.141465
1700101E01Rik	329375	2	cilia and flagella associated protein 77	protein-coding	0	0	N6 L6a Car12	0.617073	0.0746255	0	0	C11 L6a Sla	0	0.0535952	0
1700101G07Rik	619302	2	RIKEN cDNA 1700101G07 gene	unknown	0	0	N10 L5b Tph2	0.02375	0	0	0	C11 L6a Sla	0	0	0
1700101I11Rik	100504641	6	RIKEN cDNA 1700101I11 gene	ncRNA	0	3	N8 L5 Chrna6	30.5191	0.282062	2	9	C6 L6a Car12	27.4596	0.166311	0.0893982
1700101O22Rik	73575	12	RIKEN cDNA 1700101O22 gene	ncRNA	0	0	N5 L5a Batf3	0.0268687	0	0	0	C11 L6a Sla	0	0.0344828	0
1700102H20Rik	68230	17	RIKEN cDNA 1700102H20 gene	ncRNA	0	0	N10 L5b Tph2	4.36031	0.0473938	0	0	C4 L5a Hsd11b1	1.84429	0.0799423	0.72272
1700102J08Rik	74290	7	RIKEN cDNA 1700102J08 gene	unknown	0	0	N9 L5b Cdh13	0	0	0	0	C11 L6a Sla	0	0	NA
1700102P08Rik	112418	9	RIKEN cDNA 1700102P08 gene	protein-coding	0	0	N7 L6a Mgp	7.78684	0.102845	0	0	C4 L5a Hsd11b1	3.41346	0.198914	0.434553
1700104L18Rik	73592	12	RIKEN cDNA 1700104L18 gene	ncRNA	0	0	N9 L5b Cdh13	0	0	0	0	C11 L6a Sla	0	0	NA
1700105P06Rik	654802	19	RIKEN cDNA 1700105P06 gene	ncRNA	0	0	N9 L5b Cdh13	8.95235	0.0464414	0	0	C6 L6a Car12	3.47346	0.152431	0.394877
1700106J16Rik	74297	11	coiled-coil domain containing 182	protein-coding	0	0	N9 L5b Cdh13	0	0	0	0	C11 L6a Sla	0	0	NA
1700108F19Rik	73272	14	RIKEN cDNA 1700108F19 gene	ncRNA	0	0	N9 L5b Cdh13	0	0	0	0	C3 L4 Arf5	0.825222	0.0111111	0
1700108J01Rik	68245	14	RIKEN cDNA 1700108J01 gene	ncRNA	0	0	N9 L5b Cdh13	0	0.0294118	0	0	C11 L6a Sla	0	0.0316139	NA
1700108N06Rik	73560	5	RIKEN cDNA 1700108N06 gene	ncRNA	0	0	N9 L5b Cdh13	0	0	0	0	C11 L6a Sla	0	0	NA
1700109G14Rik	67355	14	RIKEN cDNA 1700109G14 gene	ncRNA	0	0	N6 L6a Car12	4.69122	0.0243902	0	0	C9 L5b Cdh13	0.131379	0.036693	0
1700109G15Rik	78471	11	RIKEN cDNA 1700109G15 gene	ncRNA	0	0	N9 L5b Cdh13	0	0	0	0	C11 L6a Sla	0	0	NA
1700109H08Rik	77036	5	RIKEN cDNA 1700109H08 gene	protein-coding	0	5	N3 L4 Arf5	9.68177	0.286718	2	9	C3 L4 Arf5	7.65056	0.120208	0.638537
1700109I08Rik	73591	14	RIKEN cDNA 1700109I08 gene	ncRNA	0	0	N9 L5b Cdh13	0	0.0126582	0	0	C11 L6a Sla	0	0.0628038	NA
1700109K24Rik	74303	15	RIKEN cDNA 1700109K24 gene	ncRNA	0	0	N4 L5a Hsd11b1	9.52254	0.186133	0	4	C4 L5a Hsd11b1	5.37211	0.288675	0.696357
1700110C19Rik	76634	17	RIKEN cDNA 1700110C19 gene	ncRNA	0	0	N2 Sst Cbln4	10.2214	0.054203	0	0	C3 L4 Arf5	1.44778	0.0656317	0.595503
1700110I01Rik	73549	14	RIKEN cDNA 1700110I01 gene	ncRNA	0	0	N1 Pvalb Wt1	0.0251429	0.0498576	0	0	C1 Pvalb Wt1	0.0125	0	0.375845
1700110I07Rik	77001	7	RIKEN cDNA 1700110I07 gene	ncRNA	0	0	N9 L5b Cdh13	0	0	0	0	C4 L5a Hsd11b1	0.00466165	0.0075188	0
1700110K17Rik	73558	9	RIKEN cDNA 1700110K17 gene	ncRNA	0	0	N7 L6a Mgp	7.35789	0.210509	1	4	C9 L5b Cdh13	3.55138	0.250479	0.455466
1700112D23Rik	73611	3	RIKEN cDNA 1700112D23 gene	unknown	0	0	N11 L6a Sla	4.62719	0.0645018	0	0	C6 L6a Car12	8.83269	0.20542	0.0852192
1700112E06Rik	76633	14	leucine rich melanocyte differentiation associated	protein-coding	0	0	N8 L5 Chrna6	1.70455	0.107545	0	0	C4 L5a Hsd11b1	0.159173	0.19687	0.00408326
1700112H04Rik	78470	7	RIKEN cDNA 1700112H04 gene	ncRNA	0	0	N5 L5a Batf3	3.90707	0.0263612	0	0	C4 L5a Hsd11b1	0.929398	0.0300752	0.167808
1700112H15Rik	73590	1	RIKEN cDNA 1700112H15 gene	ncRNA	0	0	N9 L5b Cdh13	0	0	0	0	C11 L6a Sla	0	0	NA
1700112J05Rik	68246	5	RIKEN cDNA 1700112J05 gene	ncRNA	0	0	N9 L5b Cdh13	0	0.0294118	0	0	C9 L5b Cdh13	0.207931	0.0636575	0
1700112J16Rik	76628	7	RIKEN cDNA 1700112J16 gene	ncRNA	0	0	N10 L5b Tph2	0.322813	0.0258185	0	0	C8 L5 Chrna6	0.55	0.125191	0.0215863
1700112K13Rik	73596	4	RIKEN cDNA 1700112K13 gene	ncRNA	0	0	N9 L5b Cdh13	0	0	0	0	C11 L6a Sla	0	0	NA
1700112N08Rik	73593	5	RIKEN cDNA 1700112N08 gene	ncRNA	0	0	N9 L5b Cdh13	0	0	0	0	C2 Sst Cbln4	0.343043	0.0434783	0
1700113A16Rik	76642	3	RIKEN cDNA 1700113A16 gene	ncRNA	0	2	N3 L4 Arf5	56.4008	0.119043	2	9	C3 L4 Arf5	93.6982	0.0773067	0.270023
1700113B09Rik	78638	10	RIKEN cDNA 1700113B09 gene	ncRNA	0	0	N8 L5 Chrna6	14.7945	0.0748245	0	0	C11 L6a Sla	0	0	0
1700113H08Rik	76640	10	RIKEN cDNA 1700113H08 gene	protein-coding	0	0	N6 L6a Car12	0.21878	0.0581934	0	0	C2 Sst Cbln4	0.15087	0.138477	0.328326
1700116B05Rik	78639	16	RIKEN cDNA 1700116B05 gene	ncRNA	0	0	N9 L5b Cdh13	0	0	0	0	C11 L6a Sla	0	0	NA
1700116H05Rik	73622	17	RIKEN cDNA 1700116H05 gene	ncRNA	0	0	N9 L5b Cdh13	0	0.0244961	0	0	C11 L6a Sla	0	0.009534	NA
1700119H24Rik	76649	16	RIKEN cDNA 1700119H24 gene	ncRNA	0	0	N9 L5b Cdh13	0	0	0	0	C1 Pvalb Wt1	0.305	0.03125	0
1700120C14Rik	73600	15	RIKEN cDNA 1700120C14 gene	ncRNA	0	0	N10 L5b Tph2	9.2875	0.206422	2	6	C5 L5a Batf3	6.5446	0.38325	0.160575
1700120E14Rik	73606	18	RIKEN cDNA 1700120E14 gene	ncRNA	0	0	N2 Sst Cbln4	0.983182	0.17028	0	0	C11 L6a Sla	0	0.0767448	0
1700120G07Rik	74314	7	RIKEN cDNA 1700120G07 gene	ncRNA	0	0	N9 L5b Cdh13	0	0.0243902	0	0	C11 L6a Sla	0	0.0344828	NA
1700120K04Rik	68232	7	RIKEN cDNA 1700120K04 gene	ncRNA	0	0	N11 L6a Sla	2.14781	0.0225774	0	0	C8 L5 Chrna6	0.547778	0.0770096	0.189959
1700121N20Rik	76639	12	RIKEN cDNA 1700121N20 gene	ncRNA	0	0	N9 L5b Cdh13	0	0.03125	0	0	C9 L5b Cdh13	0.277241	0.0356741	0
1700122C19Rik	78640	19	RIKEN cDNA 1700122C19 gene	ncRNA	0	0	N9 L5b Cdh13	0	0	0	0	C11 L6a Sla	0	0	NA
1700122E12Rik	73619	8	RIKEN cDNA 1700122E12 gene	ncRNA	0	0	N4 L5a Hsd11b1	0.751356	0.0141855	0	0	C1 Pvalb Wt1	0.465313	0.0621165	0.0474291
1700122H20Rik	73617	17	RIKEN cDNA 1700122H20 gene	ncRNA	0	0	N1 Pvalb Wt1	0.456857	0.0366962	0	0	C2 Sst Cbln4	0.0491304	0.0983486	0.44253
1700122O11Rik	76651	17	RIKEN cDNA 1700122O11 gene	protein-coding	0	0	N9 L5b Cdh13	0	0	0	0	C11 L6a Sla	0	0	NA
1700123I01Rik	622554	19	membrane anchored junction protein	protein-coding	0	0	N9 L5b Cdh13	0	0.0391794	0	0	C2 Sst Cbln4	0.156957	0.0632042	0
1700123J17Rik	76728	7	RIKEN cDNA 1700123J17 gene	ncRNA	0	0	N9 L5b Cdh13	0	0.0169492	0	0	C1 Pvalb Wt1	0.0146875	0.0229205	0
1700123K08Rik	76658	5	RIKEN cDNA 1700123K08 gene	protein-coding	0	0	N10 L5b Tph2	0.638437	0.0240075	0	0	C3 L4 Arf5	0.409333	0.029819	0.678334
1700123L14Rik	78482	6	nucleoporin 50 pseudogene	pseudo	0	0	N10 L5b Tph2	2.06688	0.126333	0	0	C10 L5b Tph2	1.27815	0.30343	0.347214
1700123M08Rik	100503636	4	RIKEN cDNA 1700123M08 gene	ncRNA	0	0	N7 L6a Mgp	5.17947	0.158032	0	0	C11 L6a Sla	1.76696	0.173872	0.340598
1700123O12Rik	73624	4	RIKEN cDNA 1700123O12 gene	ncRNA	0	0	N9 L5b Cdh13	0	0.0591495	0	0	C11 L6a Sla	0	0.0879742	NA
1700123O20Rik	58248	14	RIKEN cDNA 1700123O20 gene	protein-coding	1	7	N11 L6a Sla	21.2303	0.127229	2	9	C9 L5b Cdh13	34.0424	0.123305	0.148365
1700123O21Rik	68238	16	RIKEN cDNA 1700123O21 gene	ncRNA	1	1	N1 Pvalb Wt1	5.52171	0.480837	2	1	C10 L5b Tph2	1.43148	0.405241	0.583946
1700124L16Rik	67934	6	RIKEN cDNA 1700124L16 gene	ncRNA	0	0	N2 Sst Cbln4	37.6159	0.0965427	0	0	C1 Pvalb Wt1	5.89625	0.20672	0.459802
1700124M09Rik	73605	10	RIKEN cDNA 1700124M09 gene	ncRNA	0	0	N9 L5b Cdh13	0	0	0	0	C11 L6a Sla	0	0	NA
1700125G02Rik	73628	4	RIKEN cDNA 1700125G02 gene	ncRNA	0	0	N10 L5b Tph2	3.30531	0.230732	0	0	C10 L5b Tph2	0.810741	0.18632	0.592542
1700125G22Rik	76657	3	RIKEN cDNA 1700125G22 gene	ncRNA	0	0	N9 L5b Cdh13	0	0	0	0	C10 L5b Tph2	0.772963	0.0829816	0
1700125H03Rik	73609	8	RIKEN cDNA 1700125H03 gene	ncRNA	0	0	N4 L5a Hsd11b1	0.223729	0.0251881	0	0	C6 L6a Car12	0.804615	0.0960672	0.0586993
1700125H20Rik	73634	11	RIKEN cDNA 1700125H20 gene	protein-coding	0	0	N5 L5a Batf3	0.212929	0.123702	0	0	C8 L5 Chrna6	0.22	0.179778	0.244541
1700126H18Rik	73639	5	RIKEN cDNA 1700126H18 gene	ncRNA	0	0	N9 L5b Cdh13	0	0.0298356	0	0	C11 L6a Sla	0	0.037037	NA
1700128A07Rik	73631	14	RIKEN cDNA 1700128A07 gene	ncRNA	0	0	N9 L5b Cdh13	0	0.010101	0	0	C11 L6a Sla	0	0.0075188	NA
1700128E19Rik	73618	8	RIKEN cDNA 1700128E19 gene	unknown	0	0	N9 L5b Cdh13	0	0	0	0	C9 L5b Cdh13	0.259655	0.0293631	0
1700128F08Rik	76669	9	U1-snRNP binding protein homolog pseudogene	pseudo	0	0	N7 L6a Mgp	0.116842	0.0369695	0	0	C6 L6a Car12	0.0169231	0.0323961	0
1700129C05Rik	67932	14	RIKEN cDNA 1700129C05 gene	protein-coding	0	0	N9 L5b Cdh13	0	0	0	0	C11 L6a Sla	0	0	NA
1810006J02Rik	69030	1	RIKEN cDNA 1810006J02 gene	ncRNA	0	0	N9 L5b Cdh13	0	0	0	0	C11 L6a Sla	0	0	NA
1810007C17Rik	69054	12	RIKEN cDNA 1810007C17 gene	ncRNA	0	0	N6 L6a Car12	0.728537	0.0243902	0	0	C8 L5 Chrna6	0.486667	0.0854712	0
1810007D17Rik	69055	19	RIKEN cDNA 1810007D17 gene	ncRNA	0	0	N6 L6a Car12	1.35293	0.0368519	0	0	C6 L6a Car12	0.0584615	0.080492	1
1810008I18Rik	100503969	7	RIKEN cDNA 1810008I18 gene	ncRNA	0	0	N9 L5b Cdh13	0	0	0	0	C11 L6a Sla	0	0	NA
1810009A15Rik	66276	19	RIKEN cDNA 1810009A15 gene	protein-coding	0	0	N2 Sst Cbln4	80.46	0.141673	2	9	C11 L6a Sla	53.6187	0.207809	0.207339
1810009J06Rik	73626	6	RIKEN cDNA 1810009J06 gene	protein-coding	0	0	N9 L5b Cdh13	0	0	0	0	C11 L6a Sla	0	0	NA
1810010D01Rik	100040049	7	RIKEN cDNA 1810010D01 gene	ncRNA	0	0	N9 L5b Cdh13	9.02735	0.109736	0	0	C10 L5b Tph2	1.23963	0.143467	0.680564
1810010H24Rik	69066	11	RIKEN cDNA 1810010H24 gene	protein-coding	0	0	N1 Pvalb Wt1	5.48886	0.0611778	0	0	C1 Pvalb Wt1	3.10438	0.234007	0.316361
1810010K12Rik	74169	2	RIKEN cDNA 1810010K12 gene	ncRNA	0	0	N9 L5b Cdh13	0	0	0	0	C11 L6a Sla	0	0	NA
1810011H11Rik	69069	14	RIKEN cDNA 1810011H11 gene	protein-coding	0	0	N2 Sst Cbln4	5.58773	0.0709104	0	0	C11 L6a Sla	0	0	0
1810011O10Rik	69068	8	transcriptional and immune response regulator	protein-coding	0	0	N1 Pvalb Wt1	0.0882857	0.0285714	0	0	C1 Pvalb Wt1	1.79563	0.130584	0.00566048
1810012K08Rik	69095	2	RIKEN cDNA 1810012K08 gene	ncRNA	0	0	N3 L4 Arf5	2.81532	0.0265246	0	0	C7 L6a Mgp	0.845238	0.0980599	0.17692
1810012K16Rik	69108	8	RIKEN cDNA 1810012K16 gene	ncRNA	0	0	N5 L5a Batf3	6.15081	0.0612575	0	0	C10 L5b Tph2	1.8337	0.148454	0.332469
1810013A23Rik	69050	17	RIKEN cDNA 1810013A23 gene	ncRNA	0	0	N10 L5b Tph2	3.02969	0.03125	0	0	C11 L6a Sla	0	0	0
1810013D15Rik	69042	3	RIKEN cDNA 1810013D15 gene	ncRNA	0	0	N3 L4 Arf5	0.0250633	0.0212256	0	0	C11 L6a Sla	0.100435	0.0612236	0
1810013L24Rik	69053	16	RIKEN cDNA 1810013L24 gene	protein-coding	1	7	N9 L5b Cdh13	18.5671	0.152222	2	9	C4 L5a Hsd11b1	9.16496	0.0642987	0.3232
1810014B01Rik	66263	10	RIKEN cDNA 1810014B01 gene	pseudo	0	0	N9 L5b Cdh13	11.9065	0.0957179	1	0	C1 Pvalb Wt1	7.30875	0.241303	0.230819
1810018F18Rik	69166	19	RIKEN cDNA 1810018F18 gene	ncRNA	0	0	N9 L5b Cdh13	0	0	0	0	C11 L6a Sla	0	0	NA
1810019D21Rik	69771	8	RIKEN cDNA 1810019D21 gene	ncRNA	0	0	N10 L5b Tph2	0.995625	0.0664288	0	0	C7 L6a Mgp	0.544286	0.0493741	0.132393
1810019N24Rik	69086	7	RIKEN cDNA 1810019N24 gene	ncRNA	0	0	N5 L5a Batf3	1.21949	0.0717801	0	0	C9 L5b Cdh13	0.746552	0.0988279	0.0283044
1810020O05Rik	613264	6	Riken cDNA 1810020O05 gene	ncRNA	0	0	N4 L5a Hsd11b1	5.72254	0.0243808	0	0	C3 L4 Arf5	1.86433	0.0811103	0.38303
1810021B22Rik	69120	15	RIKEN cDNA 1810021B22 gene	ncRNA	0	0	N2 Sst Cbln4	4.33955	0.0627293	0	0	C11 L6a Sla	3.79087	0.205099	0.181206
1810022K09Rik	69126	3	RIKEN cDNA 1810022K09 gene	protein-coding	2	9	N8 L5 Chrna6	142.731	0.192427	2	9	C11 L6a Sla	179.653	0.0344828	0.17538
1810024B03Rik	329509	2	RIKEN cDNA 1810024B03 gene	protein-coding	0	0	N7 L6a Mgp	4.87895	0.0906851	0	0	C4 L5a Hsd11b1	0.448045	0.167819	0.258165
1810026B05Rik	69170	7	RIKEN cDNA 1810026B05 gene	ncRNA	2	9	N3 L4 Arf5	21.989	0.117719	2	9	C3 L4 Arf5	13.1213	0.0662838	0.554092
1810026J23Rik	69773	9	translocase of inner mitochondrial membrane 29	protein-coding	0	0	N5 L5a Batf3	28.8915	0.151045	2	9	C11 L6a Sla	17.9552	0.210066	0.301644
1810032O08Rik	66293	11	RIKEN cDNA 1810032O08 gene	ncRNA	0	0	N8 L5 Chrna6	10.3218	0.104121	0	0	C3 L4 Arf5	2.97578	0.15219	0.688493
1810034E14Rik	66503	13	RIKEN cDNA 1810034E14 gene	ncRNA	0	2	N10 L5b Tph2	0.173125	0.208271	1	0	C9 L5b Cdh13	0.512069	0.236218	0.0312865
1810035K13Rik	78328	19	RIKEN cDNA 1810035K13 gene	ncRNA	0	0	N9 L5b Cdh13	0	0	0	0	C11 L6a Sla	0	0	NA
1810037I17Rik	67704	3	RIKEN cDNA 1810037I17 gene	protein-coding	1	4	N11 L6a Sla	83.4103	0.201425	2	9	C11 L6a Sla	200.755	0.0294766	0.111883
1810041H14Rik	78312	14	RIKEN cDNA 1810041H14 gene	ncRNA	0	0	N3 L4 Arf5	1.4462	0.0506336	0	0	C9 L5b Cdh13	0.986207	0.127438	0.295213
1810041L15Rik	72301	15	RIKEN cDNA 1810041L15 gene	protein-coding	0	0	N7 L6a Mgp	9.52211	0.27643	1	5	C11 L6a Sla	5.83652	0.549628	0.367246
1810043G02Rik	67884	10	RIKEN cDNA 1810043G02 gene	protein-coding	0	1	N10 L5b Tph2	25.5106	0.191651	2	9	C10 L5b Tph2	26.8237	0.266984	0.222418
1810044D09Rik	69798	6	RIKEN cDNA 1810044D09 gene	ncRNA	0	0	N1 Pvalb Wt1	3.94971	0.024906	0	0	C2 Sst Cbln4	6.02391	0.139577	0.159828
1810046K07Rik	69809	9	RIKEN cDNA 1810046K07 gene	protein-coding	0	0	N6 L6a Car12	0.173902	0.0871103	0	0	C2 Sst Cbln4	0.289565	0.201655	0
1810049I09Rik	75601	7	RIKEN cDNA 1810049I09 gene	ncRNA	0	0	N9 L5b Cdh13	0	0	0	0	C11 L6a Sla	0	0	NA
1810053B23Rik	69857	16	RIKEN cDNA 1810053B23 gene	ncRNA	0	0	N9 L5b Cdh13	0	0	0	0	C11 L6a Sla	0	0	NA
1810055G02Rik	72056	19	RIKEN cDNA 1810055G02 gene	protein-coding	0	0	N9 L5b Cdh13	27.9868	0.159922	2	9	C5 L5a Batf3	25.3496	0.2322	0.249043
1810058I24Rik	67705	6	RIKEN cDNA 1810058I24 gene	ncRNA	0	0	N10 L5b Tph2	16.1469	0.137765	2	9	C8 L5 Chrna6	28.0489	0.288439	0.0885106
1810062G17Rik	72282	3	RIKEN cDNA 1810062G17 gene	protein-coding	0	0	N6 L6a Car12	1.2622	0.0328242	0	0	C9 L5b Cdh13	0.399655	0.0590945	0.447949
1810062O18Rik	75602	14	RIKEN cDNA 1810062O18 gene	ncRNA	0	0	N3 L4 Arf5	8.05949	0.265786	0	2	C6 L6a Car12	5.47154	0.223931	0.25709
1810063I02Rik	69854	11	RIKEN cDNA 1810063I02 gene	ncRNA	0	0	N9 L5b Cdh13	0	0	0	0	C11 L6a Sla	0	0	NA
1810064F22Rik	69862	9	RIKEN cDNA 1810064F22 gene	ncRNA	0	0	N3 L4 Arf5	0.0364557	0.0786736	0	0	C3 L4 Arf5	0.0404444	0.159346	0.385207
1810065E05Rik	69864	11	RIKEN cDNA 1810065E05 gene	protein-coding	0	0	N9 L5b Cdh13	0	0	0	0	C11 L6a Sla	0	0	NA
1810073O08Rik	72285	17	RIKEN cDNA 1810073O08 gene	ncRNA	0	0	N9 L5b Cdh13	0	0	0	0	C11 L6a Sla	0	0	NA
2010001A14Rik	76516	11	RIKEN cDNA 2010001A14 gene	ncRNA	0	0	N8 L5 Chrna6	10.7955	0.164067	1	1	C1 Pvalb Wt1	11.8459	0.385968	0.143571
2010001E11Rik	72045	10	major facilitator superfamily domain containing 4B2	protein-coding	0	0	N4 L5a Hsd11b1	0.00728814	0	0	0	C5 L5a Batf3	0.005	0.02	0
2010001M07Rik	69813	9	RIKEN cDNA 2010001M07 gene	ncRNA	0	0	N5 L5a Batf3	0.426364	0.010101	0	0	C4 L5a Hsd11b1	0.0487218	0.0075188	0
2010002M12Rik	112419	19	interferon induced protein with tetratricopeptide repeats 1B like 2	protein-coding	0	0	N10 L5b Tph2	3.58625	0.111924	0	0	C2 Sst Cbln4	3.07304	0.193426	0.161356
2010003K11Rik	69861	19	RIKEN cDNA 2010003K11 gene	protein-coding	0	0	N9 L5b Cdh13	0	0	0	0	C11 L6a Sla	0	0	NA
2010005H15Rik	76770	16	RIKEN cDNA 2010005H15 gene	protein-coding	0	0	N9 L5b Cdh13	0	0	0	0	C11 L6a Sla	0	0.0075188	NA
2010009K17Rik	72340	2	RIKEN cDNA 2010009K17 gene	ncRNA	0	0	N5 L5a Batf3	1.00242	0.0372316	0	0	C3 L4 Arf5	0.744333	0.0789258	0.117968
2010010A06Rik	100503117	18	RIKEN cDNA 2010010A06 gene	ncRNA	0	0	N5 L5a Batf3	0.523737	0.0619412	0	0	C4 L5a Hsd11b1	0.0162406	0.0870515	0.558404
2010012O05Rik	66439	19	BLOC-1 related complex subunit 7	protein-coding	1	2	N10 L5b Tph2	32.9794	0.204282	2	9	C2 Sst Cbln4	40.8617	0.171433	0.107253
2010016I18Rik	69206	3	RIKEN cDNA 2010016I18 gene	ncRNA	0	0	N4 L5a Hsd11b1	0.0130508	0	0	0	C11 L6a Sla	0	0	0
2010106C02Rik	72104	17	RIKEN cDNA 2010106C02 gene	ncRNA	0	0	N10 L5b Tph2	0.445	0.0281899	0	0	C4 L5a Hsd11b1	0.205639	0.0246673	0
2010107G12Rik	243753	6	solute carrier family 23 member 4	protein-coding	0	0	N9 L5b Cdh13	2.02559	0.0349117	0	0	C2 Sst Cbln4	0.85913	0.0637907	0.005208
2010107G23Rik	69894	10	family with sequence similarity 241, member B	protein-coding	0	1	N8 L5 Chrna6	27.3409	0.289333	2	9	C11 L6a Sla	38.4509	0.0679213	0.196569
2010109A12Rik	75610	5	RIKEN cDNA 2010109A12 gene	protein-coding	0	0	N4 L5a Hsd11b1	1.95407	0.0282772	0	0	C5 L5a Batf3	0.5554	0.0853631	0.287321
2010109I03Rik	67038	15	RIKEN cDNA 2010109I03 gene	protein-coding	0	0	N6 L6a Car12	11.2854	0.047665	0	0	C4 L5a Hsd11b1	1.61278	0.138126	0.715244
2010110K18Rik	100503082	18	RIKEN cDNA 2010110K18 gene	unknown	0	0	N1 Pvalb Wt1	0.571143	0.0285714	0	0	C8 L5 Chrna6	0.672222	0.0704481	0.0519103
2010111I01Rik	72061	13	RIKEN cDNA 2010111I01 gene	protein-coding	2	9	N6 L6a Car12	90.2317	0.117055	2	9	C6 L6a Car12	20.6735	0.0710981	0.876498
2010203P06Rik	66547	13	RIKEN cDNA 2010203P06 gene	ncRNA	0	0	N9 L5b Cdh13	0	0	0	0	C11 L6a Sla	0	0	NA
2010300C02Rik	72097	1	RIKEN cDNA 2010300C02 gene	protein-coding	0	8	N6 L6a Car12	17.0088	0.507217	1	9	C6 L6a Car12	25.8462	0.502032	0.247168
2010300F17Rik	69884	11	RIKEN cDNA 2010300F17 gene	unknown	0	0	N9 L5b Cdh13	0	0.038244	0	0	C10 L5b Tph2	0.191852	0.0813884	0
2010310C07Rik	72131	6	RIKEN cDNA 2010310C07 gene	ncRNA	0	0	N9 L5b Cdh13	0	0.0454545	0	0	C4 L5a Hsd11b1	0.139323	0.104461	0
2010315B03Rik	630836	9	RIKEN cDNA 2010315B03 gene	protein-coding	0	1	N7 L6a Mgp	36.3968	0.100308	2	9	C8 L5 Chrna6	12.1689	0.166538	0.478882
2010320M18Rik	72093	8	RIKEN cDNA 2010320M18 gene	ncRNA	0	0	N1 Pvalb Wt1	10.4817	0.0881848	2	6	C11 L6a Sla	18.92	0.417811	0.100624
2010320O07Rik	69881	18	RIKEN cDNA 2010320O07 gene	ncRNA	0	0	N6 L6a Car12	7.98341	0.0819844	0	0	C6 L6a Car12	2.50308	0.188133	0.467285
2200002D01Rik	72275	7	RIKEN cDNA 2200002D01 gene	protein-coding	0	0	N4 L5a Hsd11b1	1.45932	0.0141855	0	0	C10 L5b Tph2	0.172593	0.0277047	0.246897
2200002J24Rik	69147	7	RIKEN cDNA 2200002J24 gene	protein-coding	0	0	N11 L6a Sla	0.0896875	0	0	0	C2 Sst Cbln4	0.198261	0.0544881	0.0490732
2210008F06Rik	70057	11	RIKEN cDNA 2210008F06 gene	unknown	0	0	N4 L5a Hsd11b1	5.14915	0.0928735	0	0	C6 L6a Car12	4.72308	0.202251	0.088825
2210010C04Rik	67373	6	RIKEN cDNA 2210010C04 gene	protein-coding	0	0	N9 L5b Cdh13	0	0	0	0	C6 L6a Car12	0.328846	0.0573458	0
2210011C24Rik	70134	8	RIKEN cDNA 2210011C24 gene	protein-coding	0	0	N3 L4 Arf5	0.0222785	0	0	0	C1 Pvalb Wt1	2.85094	0.278296	0
2210011K15Rik	72365	1	RIKEN cDNA 2210011K15 gene	ncRNA	0	0	N9 L5b Cdh13	0	0.0169492	0	0	C11 L6a Sla	0	0.0344828	NA
2210015D19Rik	76508	11	ubiquitin-conjugating enzyme E2D, pseudogene	ncRNA	2	7	N7 L6a Mgp	40.1132	0.157972	2	9	C1 Pvalb Wt1	22.5181	0.159489	0.312877
2210016F16Rik	70153	13	RIKEN cDNA 2210016F16 gene	protein-coding	0	0	N1 Pvalb Wt1	9.28343	0.0722409	2	6	C2 Sst Cbln4	11.7961	0.334504	0.116783
2210016L21Rik	72357	5	RIKEN cDNA 2210016L21 gene	protein-coding	2	8	N2 Sst Cbln4	89.0636	0.205246	2	9	C2 Sst Cbln4	160.662	0.0333333	0.13785
2210018M11Rik	233545	7	EMSY, BRCA2-interacting transcriptional repressor	protein-coding	2	9	N3 L4 Arf5	21.4438	0.195918	2	9	C4 L5a Hsd11b1	16.1407	0.0674527	0.471966
2210019I11Rik	70147	5	PDX1 associated lncRNA, upregulator of transcription	ncRNA	0	0	N9 L5b Cdh13	0	0.0126582	0	0	C11 L6a Sla	0	0.0322185	NA
2210039B01Rik	73644	12	RIKEN cDNA 2210039B01 gene	ncRNA	0	0	N7 L6a Mgp	0.0763158	0	0	0	C11 L6a Sla	0	0	0
2210404E10Rik	72305	19	RIKEN cDNA 2210404E10 gene	ncRNA	0	0	N9 L5b Cdh13	0	0	0	0	C11 L6a Sla	0	0	NA
2210404O09Rik	70081	17	zinc finger protein 995	protein-coding	0	0	N8 L5 Chrna6	15.0273	0.138011	1	5	C11 L6a Sla	6.38	0.34615	0.488079
2210406O10Rik	76710	5	RIKEN cDNA 2210406O10 gene	ncRNA	0	0	N8 L5 Chrna6	11.8655	0.0894575	0	2	C8 L5 Chrna6	7.24667	0.294063	0.2155
2210407C18Rik	78354	11	RIKEN cDNA 2210407C18 gene	protein-coding	0	0	N9 L5b Cdh13	0	0	0	0	C1 Pvalb Wt1	0.281875	0.03125	0
2210408F21Rik	73652	6	RIKEN cDNA 2210408F21 gene	ncRNA	2	9	N8 L5 Chrna6	120.832	0.256922	2	9	C3 L4 Arf5	52.3614	0.0994859	0.464517
2210408I21Rik	72371	13	RIKEN cDNA 2210408I21 gene	protein-coding	2	9	N6 L6a Car12	9.86024	0.189351	2	9	C7 L6a Mgp	6.02857	0.0490418	0.320314
2210409D07Rik	70157	18	RIKEN cDNA 2210409D07 gene	ncRNA	0	0	N6 L6a Car12	2.72463	0.0243902	0	0	C11 L6a Sla	0	0	0
2210409E12Rik	72381	11	transcription elongation factor B (SIII), polypeptide 2 pseudogene	pseudo	0	0	N9 L5b Cdh13	0.07	0	0	0	C11 L6a Sla	0	0	0
2210414B05Rik	70143	4	RIKEN cDNA 2210414B05 gene	ncRNA	0	0	N9 L5b Cdh13	0	0	0	0	C11 L6a Sla	0	0	NA
2210416O15Rik	70393	11	RIKEN cDNA 2210416O15 gene	ncRNA	0	0	N5 L5a Batf3	1.16364	0.0251376	0	0	C2 Sst Cbln4	0.0726087	0.0577111	0.113102
2210417A02Rik	70138	5	RIKEN cDNA 2210417A02 gene	ncRNA	0	0	N9 L5b Cdh13	0	0	0	0	C11 L6a Sla	0	0	NA
2210420H20Rik	76961	18	RIKEN cDNA 2210420H20 gene	ncRNA	0	0	N10 L5b Tph2	0.48625	0.03125	0	0	C6 L6a Car12	0.239615	0.0384615	0
2300002M23Rik	69542	17	RIKEN cDNA 2300002M23 gene	protein-coding	0	0	N9 L5b Cdh13	0	0	0	0	C11 L6a Sla	0	0	NA
2300003K06Rik	100502865	11	RIKEN cDNA 2300003K06 gene	protein-coding	0	0	N9 L5b Cdh13	0	0	0	0	C11 L6a Sla	0	0	NA
2300005B03Rik	69462	15	secreted Ly6/Plaur domain containing 2	protein-coding	0	0	N9 L5b Cdh13	0	0	0	0	C1 Pvalb Wt1	0.249688	0.0361062	0
2310001H17Rik	76432	6	RIKEN cDNA 2310001H17 gene	ncRNA	0	0	N5 L5a Batf3	0.473232	0.0258185	0	0	C11 L6a Sla	2.00522	0.0894468	0.00681017
2310001K24Rik	69517	2	RIKEN cDNA 2310001K24 gene	ncRNA	0	0	N10 L5b Tph2	4.97875	0.0569296	0	0	C2 Sst Cbln4	1.61435	0.112384	0.311389
2310002D06Rik	69522	12	RIKEN cDNA 2310002D06 gene	ncRNA	0	0	N10 L5b Tph2	4.22719	0.167764	0	1	C9 L5b Cdh13	2.45172	0.256892	0.304834
2310002F09Rik	100504720	7	RIKEN cDNA 2310002F09 gene	ncRNA	0	1	N8 L5 Chrna6	19.9064	0.636364	0	1	C8 L5 Chrna6	19.9767	0.890426	0.198085
2310002L09Rik	71886	4	RIKEN cDNA 2310002L09 gene	protein-coding	0	0	N9 L5b Cdh13	0	0	0	0	C11 L6a Sla	0	0	NA
2310003H01Rik	71885	11	Fanconi anemia core complex associated protein 100	protein-coding	0	1	N6 L6a Car12	38.3429	0.198502	2	2	C3 L4 Arf5	5.86511	0.26367	0.814728
2310003N18Rik	71873	9	RIKEN cDNA 2310003N18 gene	ncRNA	0	0	N5 L5a Batf3	0.504747	0.010101	0	0	C10 L5b Tph2	0.16963	0.0306125	0.21998
2310005A03Rik	100504268	2	RIKEN cDNA 2310005A03 gene	ncRNA	0	0	N9 L5b Cdh13	0	0	0	0	C6 L6a Car12	0.0123077	0.0075188	0
2310005E17Rik	70090	13	RIKEN cDNA 2310005E17 gene	ncRNA	0	0	N9 L5b Cdh13	0	0	0	0	C11 L6a Sla	0	0.02	NA
2310007B03Rik	71874	1	RIKEN cDNA 2310007B03 gene	protein-coding	0	0	N9 L5b Cdh13	0	0	0	0	C11 L6a Sla	0	0	NA
2310007L24Rik	75573	11	proline rich 29	protein-coding	0	0	N9 L5b Cdh13	0	0	0	0	C11 L6a Sla	0	0	NA
2310008N11Rik	72316	8	RIKEN cDNA 2310008N11 gene	ncRNA	0	0	N9 L5b Cdh13	0	0.018774	0	0	C4 L5a Hsd11b1	0.098797	0.080643	0
2310009A05Rik	66364	9	RIKEN cDNA 2310009A05 gene	protein-coding	0	0	N8 L5 Chrna6	32.5591	0.148306	2	9	C1 Pvalb Wt1	64.7738	0.232049	0.0535957
2310009B15Rik	69549	1	RIKEN cDNA 2310009B15 gene	protein-coding	0	0	N6 L6a Car12	12.6022	0.142283	2	9	C8 L5 Chrna6	49.6144	0.286231	0.0651127
2310010J17Rik	78329	7	RIKEN cDNA 2310010J17 gene	ncRNA	0	0	N6 L6a Car12	4.45195	0.0671712	0	0	C6 L6a Car12	2.03654	0.18549	0.181708
2310011J03Rik	66374	10	RIKEN cDNA 2310011J03 gene	protein-coding	0	0	N6 L6a Car12	18.1751	0.0697122	2	9	C10 L5b Tph2	32.4733	0.203082	0.122329
2310014F06Rik	69625	7	RIKEN cDNA 2310014F06 gene	unknown	0	0	N9 L5b Cdh13	0	0.0202996	0	0	C6 L6a Car12	0.0888462	0.134011	0
2310014L17Rik	381845	7	ring finger protein 225	protein-coding	0	0	N6 L6a Car12	1.77707	0.0347324	0	0	C7 L6a Mgp	0.659048	0.0623968	0.383749
2310015A10Rik	69548	12	RIKEN cDNA 2310015A10 gene	ncRNA	0	0	N4 L5a Hsd11b1	4.20881	0.0821517	0	0	C11 L6a Sla	1.72391	0.115814	0.405283
2310015A16Rik	69561	17	RIKEN cDNA 2310015A16 gene	ncRNA	0	0	N9 L5b Cdh13	0	0	0	0	C11 L6a Sla	0	0	NA
2310015B20Rik	69563	10	myoregulin	protein-coding	0	0	N9 L5b Cdh13	0	0	0	0	C3 L4 Arf5	0.220222	0.085992	0
2310015D24Rik	70100	16	RIKEN cDNA 2310015D24 gene	ncRNA	0	0	N4 L5a Hsd11b1	0.36678	0.0169492	0	0	C10 L5b Tph2	0.269259	0.0481079	0.17878
2310015K22Rik	69565	1	RIKEN cDNA 2310015K22 gene	ncRNA	0	0	N5 L5a Batf3	0.00373737	0	0	0	C3 L4 Arf5	0.00477778	0.0075188	0
2310016D03Rik	69566	12	RIKEN cDNA 2310016D03 gene	ncRNA	0	0	N5 L5a Batf3	0.00363636	0.010101	0	0	C11 L6a Sla	0	0.0303991	0
2310016D23Rik	76443	1	RIKEN cDNA 2310016D23 gene	ncRNA	0	0	N9 L5b Cdh13	0	0	0	0	C11 L6a Sla	0	0.0384615	NA
2310016G11Rik	69578	7	RIKEN cDNA 2310016G11 gene	unknown	0	0	N1 Pvalb Wt1	0.278	0.0487721	0	0	C1 Pvalb Wt1	0.035625	0.0349104	0.823324
2310020H05Rik	69603	13	RIKEN cDNA 2310020H05 gene	ncRNA	0	0	N4 L5a Hsd11b1	1.18	0.0228247	0	0	C3 L4 Arf5	0.181	0.0446966	0.301532
2310022A10Rik	66367	7	RIKEN cDNA 2310022A10 gene	protein-coding	0	0	N2 Sst Cbln4	13.5923	0.165338	2	9	C2 Sst Cbln4	8.71739	0.204666	0.214703
2310022B05Rik	69551	8	RIKEN cDNA 2310022B05 gene	protein-coding	0	0	N4 L5a Hsd11b1	6.91237	0.178189	0	3	C4 L5a Hsd11b1	5.73203	0.303367	0.349469
2310026I22Rik	69593	18	RIKEN cDNA 2310026I22 gene	ncRNA	0	0	N6 L6a Car12	0.257805	0.0785138	0	0	C4 L5a Hsd11b1	0.334662	0.157025	0.117247
2310030A07Rik	75584	1	RIKEN cDNA 2310030A07 gene	ncRNA	0	0	N9 L5b Cdh13	0	0.0401261	0	0	C3 L4 Arf5	0.0656667	0.0183071	0
2310030G06Rik	66952	9	RIKEN cDNA 2310030G06 gene	protein-coding	0	0	N6 L6a Car12	5.73195	0.0417698	0	0	C2 Sst Cbln4	9.79783	0.25242	0.0638209
2310033P09Rik	67862	11	RIKEN cDNA 2310033P09 gene	protein-coding	0	3	N9 L5b Cdh13	51.8091	0.387269	2	9	C9 L5b Cdh13	43.5693	0.202004	0.290436
2310034C09Rik	117172	16	RIKEN cDNA 2310034C09 gene	protein-coding	0	0	N9 L5b Cdh13	0	0	0	0	C11 L6a Sla	0	0	NA
2310034G01Rik	75579	19	RIKEN cDNA 2310034G01 gene	ncRNA	0	0	N2 Sst Cbln4	6.18591	0.0322802	0	0	C7 L6a Mgp	5.62952	0.192856	0.0996043
2310034O05Rik	69571	5	RIKEN cDNA 2310034O05 gene	ncRNA	0	0	N4 L5a Hsd11b1	0.0477966	0.0816196	0	0	C11 L6a Sla	1.93652	0.151945	0.0063795
2310034P14Rik	69579	7	RIKEN cDNA 2310034P14 gene	protein-coding	0	0	N4 L5a Hsd11b1	3.31407	0.0729798	0	0	C7 L6a Mgp	1.93143	0.163592	0.195581
2310035C23Rik	227446	1	RIKEN cDNA 2310035C23 gene	protein-coding	2	9	N6 L6a Car12	30.4871	0.0945994	2	9	C9 L5b Cdh13	14.8183	0.0431941	0.425196
2310036O22Rik	68544	8	telomerase RNA component interacting RNase	protein-coding	1	7	N1 Pvalb Wt1	63.05	0.170711	2	9	C5 L5a Batf3	119.977	0.0272684	0.110005
2310039H08Rik	67101	17	RIKEN cDNA 2310039H08 gene	protein-coding	0	0	N10 L5b Tph2	24.6684	0.152421	0	3	C3 L4 Arf5	11.5477	0.221859	0.348357
2310039L15Rik	69629	10	RIKEN cDNA 2310039L15 gene	ncRNA	0	0	N9 L5b Cdh13	0	0.0789097	0	0	C6 L6a Car12	0.201154	0.0728906	0
2310040G24Rik	381792	6	RIKEN cDNA 2310040G24 gene	ncRNA	0	0	N1 Pvalb Wt1	3.66686	0.0428985	0	2	C4 L5a Hsd11b1	12.6105	0.359631	0.0897622
2310043L19Rik	75589	1	RIKEN cDNA 2310043L19 gene	ncRNA	0	0	N9 L5b Cdh13	0	0	0	0	C4 L5a Hsd11b1	0.171203	0.0150376	0
2310043O21Rik	69679	15	RIKEN cDNA 2310043O21 gene	ncRNA	0	0	N9 L5b Cdh13	0	0.0726125	0	0	C11 L6a Sla	0	0.0376912	NA
2310045N01Rik	72368	8	BLOC-1 related complex subunit 8	protein-coding	0	4	N8 L5 Chrna6	41.4809	0.233953	2	9	C10 L5b Tph2	44.61	0.0920289	0.193167
2310047D07Rik	69657	5	RIKEN cDNA 2310047D07 gene	unknown	0	0	N6 L6a Car12	2.02463	0.0494697	0	0	C2 Sst Cbln4	0.537391	0.061463	0.0937189
2310047M10Rik	71923	11	BLOC-1 related complex subunit 6	protein-coding	0	0	N7 L6a Mgp	3.79474	0.150261	2	9	C3 L4 Arf5	9.96056	0.232055	0.0901817
2310050C09Rik	66533	3	RIKEN cDNA 2310050C09 gene	protein-coding	0	0	N9 L5b Cdh13	0	0	0	0	C11 L6a Sla	0	0	NA
2310057J18Rik	67719	10	RIKEN cDNA 2310057J18 gene	protein-coding	0	0	N9 L5b Cdh13	0	0	0	0	C11 L6a Sla	0	0	NA
2310057M21Rik	68277	7	RIKEN cDNA 2310057M21 gene	protein-coding	0	1	N8 L5 Chrna6	25.5291	0.194947	2	9	C9 L5b Cdh13	18.341	0.194396	0.189192
2310057N15Rik	69696	16	RIKEN cDNA 2310057N15 gene	protein-coding	0	0	N9 L5b Cdh13	0	0	0	0	C11 L6a Sla	0	0	NA
2310061J03Rik	66391	16	zinc finger and BTB domain containing 11, opposite strand 1	ncRNA	0	0	N11 L6a Sla	9.63656	0.0481556	2	5	C11 L6a Sla	16.0604	0.478669	0.187123
2310061N02Rik	69661	16	RIKEN cDNA 2310061N02 gene	protein-coding	0	0	N9 L5b Cdh13	0	0	0	0	C11 L6a Sla	0	0	NA
2310065F04Rik	74184	11	RIKEN cDNA 2310065F04 gene	ncRNA	0	0	N9 L5b Cdh13	0	0	0	0	C11 L6a Sla	0	0	NA
2310067B10Rik	71947	11	transmembrane protein 94	protein-coding	0	2	N9 L5b Cdh13	16.8538	0.321014	1	7	C9 L5b Cdh13	9.01414	0.304373	0.435325
2310067E19Rik	76455	4	RIKEN cDNA 2310067E19 gene	unknown	0	3	N9 L5b Cdh13	15.1344	0.405652	0	3	C9 L5b Cdh13	2.77414	0.444169	0.927501
2310068J16Rik	70281	15	RIKEN cDNA 2310068J16 gene	ncRNA	0	0	N6 L6a Car12	2.53098	0.125829	1	3	C1 Pvalb Wt1	4.81781	0.337476	0.182634
2310069B03Rik	69652	6	RIKEN cDNA 2310069B03 gene	ncRNA	0	0	N9 L5b Cdh13	0	0	0	0	C11 L6a Sla	0	0	NA
2310069G16Rik	69659	15	RIKEN cDNA 2310069G16 gene	ncRNA	0	0	N1 Pvalb Wt1	25.2074	0.132131	2	6	C1 Pvalb Wt1	24.3931	0.269069	0.1707
2310075C17Rik	70194	9	RIKEN cDNA 2310075C17 gene	ncRNA	0	3	N3 L4 Arf5	52.1122	0.408659	0	9	C3 L4 Arf5	19.3952	0.568914	0.72625
2310075K07Rik	100125933	10	RIKEN cDNA 2310075K07 gene	unknown	0	0	N6 L6a Car12	21.6941	0.103192	1	2	C4 L5a Hsd11b1	8.01015	0.218919	0.469441
2310079G19Rik	69699	16	RIKEN cDNA 2310079G19 gene	protein-coding	0	0	N9 L5b Cdh13	0	0	0	0	C11 L6a Sla	0	0	NA
2310081J21Rik	69211	13	RIKEN cDNA 2310081J21 gene	ncRNA	0	0	N9 L5b Cdh13	0	0	0	0	C11 L6a Sla	0	0	NA
2400006E01Rik	78648	3	RIKEN cDNA 2400006E01 gene	ncRNA	0	0	N9 L5b Cdh13	0.0452941	0.03125	0	0	C11 L6a Sla	0	0.0781811	0
2410002F23Rik	668661	7	RIKEN cDNA 2410002F23 gene	protein-coding	0	1	N9 L5b Cdh13	33.9668	0.200551	2	9	C10 L5b Tph2	27.1833	0.155577	0.242269
2410003L11Rik	69729	11	RIKEN cDNA 2410003L11 gene	ncRNA	0	0	N11 L6a Sla	0.784375	0.0699312	0	0	C9 L5b Cdh13	0.251379	0.127516	0.0629303
2410004B18Rik	66421	3	RIKEN cDNA 2410004B18 gene	protein-coding	0	0	N8 L5 Chrna6	41.2291	0.127296	2	9	C11 L6a Sla	52.907	0.236055	0.152873
2410004I01Rik	69739	11	RIKEN cDNA 2410004I01 gene	ncRNA	0	0	N9 L5b Cdh13	0	0	0	0	C1 Pvalb Wt1	1.40281	0.0662538	0
2410004N09Rik	69749	18	erythrocyte membrane protein band 4.1 like 4a, opposite strand	ncRNA	0	0	N2 Sst Cbln4	47.6427	0.0949351	1	3	C3 L4 Arf5	20.8957	0.159111	0.516179
2410004P03Rik	73667	12	RIKEN cDNA 2410004P03 gene	protein-coding	0	0	N3 L4 Arf5	0.272658	0.0126582	0	0	C6 L6a Car12	1.90154	0.154692	0
2410006H16Rik	69221	11	RIKEN cDNA 2410006H16 gene	ncRNA	1	0	N6 L6a Car12	92.7756	0.15058	2	9	C11 L6a Sla	89.6026	0.2624	0.274368
2410007B07Rik	69193	3	pluripotency associated transcript 10	ncRNA	0	0	N8 L5 Chrna6	4.65636	0.066963	0	0	C2 Sst Cbln4	2.45	0.204655	0.134856
2410012E07Rik	73648	14	RIKEN cDNA 2410012E07 gene	ncRNA	0	0	N9 L5b Cdh13	0	0	0	0	C4 L5a Hsd11b1	0.0530827	0.009534	0
2410012M07Rik	71979	9	proline rich 23A, member 3	protein-coding	0	0	N9 L5b Cdh13	0	0	0	0	C11 L6a Sla	0	0	NA
2410016O06Rik	71952	12	ribosomal oxygenase 1	protein-coding	0	0	N9 L5b Cdh13	8.14824	0.0684344	1	8	C11 L6a Sla	13.3591	0.274872	0.12433
2410017I17Rik	675325	17	RIKEN cDNA 2410017I17 gene	ncRNA	0	0	N9 L5b Cdh13	0	0	0	0	C11 L6a Sla	0	0	NA
2410018L13Rik	69732	12	RIKEN cDNA 2410018L13 gene	ncRNA	0	0	N11 L6a Sla	4.49031	0.169045	0	0	C3 L4 Arf5	2.99233	0.326331	0.35756
2410019O14Rik	78316	2	pluripotency associated transcript 27	ncRNA	0	0	N9 L5b Cdh13	0	0	0	0	C11 L6a Sla	0	0	NA
2410021H03Rik	69750	17	RIKEN cDNA 2410021H03 gene	ncRNA	0	0	N3 L4 Arf5	12.6216	0.105714	0	0	C3 L4 Arf5	6.78211	0.189384	0.616397
2410022M11Rik	100503842	14	RIKEN cDNA 2410022M11 gene	unknown	0	0	N11 L6a Sla	1.42844	0.0275287	0	0	C7 L6a Mgp	2.29667	0.108392	0.185985
2410088K16Rik	78650	1	pluripotency associated transcript 5	ncRNA	0	0	N9 L5b Cdh13	0	0	0	0	C11 L6a Sla	0	0	NA
2410089E03Rik	73692	15	RIKEN cDNA 2410089E03 gene	protein-coding	2	9	N3 L4 Arf5	22.7952	0.0428281	2	9	C3 L4 Arf5	15.0214	0.0355835	0.76667
2410114N07Rik	73696	4	pluripotency associated transcript 9	ncRNA	0	0	N10 L5b Tph2	0.0259375	0	0	0	C11 L6a Sla	0	0	0
2410124H12Rik	76785	16	RIKEN cDNA 2410124H12 gene	protein-coding	0	0	N9 L5b Cdh13	0	0	0	0	C11 L6a Sla	0	0	NA
2410127L17Rik	67383	19	carnosine N-methyltransferase 1	protein-coding	0	2	N4 L5a Hsd11b1	3.97	0.222054	2	9	C3 L4 Arf5	2.326	0.155645	0.401939
2410131K14Rik	76792	5	RIKEN cDNA 2410131K14 gene	protein-coding	0	0	N11 L6a Sla	16.7662	0.180299	2	8	C1 Pvalb Wt1	19.0597	0.32068	0.218283
2410137M14Rik	76797	17	RIKEN cDNA 2410137M14 gene	protein-coding	0	0	N6 L6a Car12	4.34878	0.0790607	0	0	C11 L6a Sla	4.06913	0.16284	0.324431
2410141K09Rik	76803	13	RIKEN cDNA 2410141K09 gene	protein-coding	0	0	N9 L5b Cdh13	0	0	0	0	C11 L6a Sla	0	0	NA
2500002B13Rik	78353	8	RIKEN cDNA 2500002B13 gene	ncRNA	0	0	N10 L5b Tph2	8.73406	0.134407	0	0	C9 L5b Cdh13	2.61069	0.222752	0.333561
2500004C02Rik	72326	2	RIKEN cDNA 2500004C02 gene	ncRNA	0	0	N7 L6a Mgp	18.5342	0.0330894	2	5	C6 L6a Car12	8.00077	0.210406	0.245743
2510002D24Rik	72307	16	RIKEN cDNA 2510002D24 gene	protein-coding	2	1	N3 L4 Arf5	49.9019	0.252255	2	9	C2 Sst Cbln4	36.8296	0.243859	0.3238
2510003B16Rik	76786	4	RIKEN cDNA 2510003B16 gene	ncRNA	0	1	N8 L5 Chrna6	6.17818	0.281149	2	9	C7 L6a Mgp	4.60095	0.248307	0.302915
2510003E04Rik	72320	10	KIF1 binding protein	protein-coding	1	8	N7 L6a Mgp	41.7653	0.159216	2	9	C7 L6a Mgp	87.531	0	0.111281
2510009E07Rik	72190	16	RIKEN cDNA 2510009E07 gene	protein-coding	0	4	N3 L4 Arf5	15.0544	0.360823	1	7	C3 L4 Arf5	23.0133	0.622063	0.188319
2510039O18Rik	77034	4	RIKEN cDNA 2510039O18 gene	protein-coding	0	0	N2 Sst Cbln4	14.13	0.147601	1	6	C6 L6a Car12	7.06	0.166241	0.396917
2610001J05Rik	66520	6	RIKEN cDNA 2610001J05 gene	protein-coding	0	0	N11 L6a Sla	33.3647	0.155256	2	9	C8 L5 Chrna6	60.9711	0.222024	0.143642
2610002J02Rik	67513	4	Fanconi anemia core complex associated protein 20	protein-coding	0	0	N1 Pvalb Wt1	13.6429	0.147929	2	5	C1 Pvalb Wt1	15.8066	0.387423	0.135318
2610005L07Rik	381598	8	cadherin 11 pseudogene	pseudo	2	9	N6 L6a Car12	7.34488	0.0426365	2	9	C3 L4 Arf5	3.23811	0.028781	0.65174
2610008E11Rik	72128	10	RIKEN cDNA 2610008E11 gene	protein-coding	1	7	N2 Sst Cbln4	44.1768	0.223647	2	9	C3 L4 Arf5	16.2117	0.140528	0.727752
2610015P09Rik	212153	16	coiled-coil domain containing 191	protein-coding	1	5	N7 L6a Mgp	9.92895	0.251059	2	8	C3 L4 Arf5	4.517	0.21872	0.624857
2610016A17Rik	100503074	19	RIKEN cDNA 2610016A17 gene	ncRNA	0	0	N9 L5b Cdh13	0	0	0	0	C1 Pvalb Wt1	1.15656	0.0625	0
2610020C07Rik	69918	16	RIKEN cDNA 2610020C07 gene	ncRNA	0	0	N6 L6a Car12	6.51049	0.115344	2	6	C9 L5b Cdh13	2.92966	0.329074	0.290207
2610020H08Rik	434234	7	RNA exonuclease 5	protein-coding	0	0	N11 L6a Sla	2.37406	0.146354	2	7	C4 L5a Hsd11b1	0.882782	0.22408	0.475109
2610027F03Rik	69904	1	RIKEN cDNA 2610027F03 gene	unknown	0	0	N9 L5b Cdh13	0	0.030263	0	0	C7 L6a Mgp	0.0128571	0.047619	0
2610027K06Rik	69909	11	RIKEN cDNA 2610027K06 gene	ncRNA	0	0	N8 L5 Chrna6	0.945455	0.0915056	1	6	C4 L5a Hsd11b1	1.36677	0.20187	0.0950277
2610028E06Rik	72395	4	RIKEN cDNA 2610028E06 gene	ncRNA	0	0	N2 Sst Cbln4	1.50364	0.0391541	0	0	C2 Sst Cbln4	0.122174	0.0869565	1
2610028H24Rik	76964	10	RIKEN cDNA 2610028H24 gene	protein-coding	0	0	N9 L5b Cdh13	1.77706	0.0385494	0	0	C10 L5b Tph2	0.515556	0.122771	0.251834
2610034B18Rik	70420	7	actin-related protein 2/3 complex inhibitor	protein-coding	0	0	N1 Pvalb Wt1	11.5909	0.163804	2	5	C1 Pvalb Wt1	16.2278	0.413115	0.16435
2610035D17Rik	72386	11	RIKEN cDNA 2610035D17 gene	ncRNA	0	8	N8 L5 Chrna6	19.9227	0.319961	2	9	C8 L5 Chrna6	26.3911	0.260634	0.161141
2610035F20Rik	69248	14	RIKEN cDNA 2610035F20 gene	ncRNA	0	0	N5 L5a Batf3	0.00989899	0	0	0	C11 L6a Sla	0	0	0
2610037D02Rik	70040	15	RIKEN cDNA 2610037D02 gene	ncRNA	0	0	N9 L5b Cdh13	0	0.010101	0	0	C7 L6a Mgp	0.00761905	0	0
2610042L04Rik	554327	14	RIKEN cDNA 2610042L04 gene	protein-coding	0	0	N8 L5 Chrna6	2.28273	0.115806	0	0	C2 Sst Cbln4	0.160435	0.111139	0.67247
2610044O15Rik8	72139	8	RIKEN cDNA 2610044O15 gene	protein-coding	0	2	N3 L4 Arf5	31.2706	0.179566	2	9	C7 L6a Mgp	26.381	0.0891654	0.335824
2610100L16Rik	70441	3	Mir124-2 host gene (non-protein coding)	ncRNA	2	9	N4 L5a Hsd11b1	39.5575	0.104973	2	9	C3 L4 Arf5	28.678	0.0577343	0.627029
2610203C20Rik	73144	9	RIKEN cDNA 3110039I08 gene	ncRNA	2	5	N2 Sst Cbln4	90.3841	0.322291	2	8	C2 Sst Cbln4	21.7587	0.280879	0.827995
2610203C22Rik	72481	1	RIKEN cDNA 2610203C22 gene	ncRNA	0	6	N7 L6a Mgp	2.54	0.45101	0	8	C2 Sst Cbln4	1.08348	0.621826	0.484129
2610206C17Rik	72495	7	RIKEN cDNA 2610206C17 gene	ncRNA	0	0	N11 L6a Sla	0.325625	0.0606474	0	0	C11 L6a Sla	0.600435	0.265643	0.145051
2610300M13Rik	72484	6	RIKEN cDNA 2610300M13 gene	ncRNA	0	0	N9 L5b Cdh13	0	0.0906844	0	0	C11 L6a Sla	0	0.151318	NA
2610301B20Rik	67157	4	RIKEN cDNA 2610301B20 gene	protein-coding	0	2	N7 L6a Mgp	29.1537	0.152878	2	9	C10 L5b Tph2	51.073	0.131156	0.144489
2610305D13Rik	112422	4	zinc finger protein 979	protein-coding	0	0	N9 L5b Cdh13	0	0	0	0	C4 L5a Hsd11b1	0.0636842	0.104461	0
2610306M01Rik	67170	6	RIKEN cDNA 2610306M01 gene	ncRNA	0	0	N6 L6a Car12	17.5215	0.0619993	1	6	C11 L6a Sla	14.4035	0.34178	0.220633
2610307P16Rik	72518	13	RIKEN cDNA 2610307P16 gene	ncRNA	0	0	N9 L5b Cdh13	0	0.132818	0	0	C3 L4 Arf5	0.532556	0.165022	0
2610316D01Rik	72511	3	RIKEN cDNA 2610316D01 gene	ncRNA	2	4	N2 Sst Cbln4	82.6105	0.283061	2	9	C2 Sst Cbln4	24.2535	0.182003	0.643512
2610318N02Rik	70458	16	RIKEN cDNA 2610318N02 gene	protein-coding	0	0	N1 Pvalb Wt1	10.5429	0.257991	1	0	C1 Pvalb Wt1	6.32562	0.345583	0.169075
2610507I01Rik	72203	11	RIKEN cDNA 2610507I01 gene	ncRNA	0	0	N1 Pvalb Wt1	20.134	0.161602	2	2	C10 L5b Tph2	6.9763	0.369728	0.359614
2610524H06Rik	330173	5	RIKEN cDNA 2610524H06 gene	protein-coding	0	1	N8 L5 Chrna6	99.2073	0.166275	2	9	C2 Sst Cbln4	54.9026	0.278876	0.44528
2610528A11Rik	70045	14	RIKEN cDNA 2610528A11 gene	protein-coding	0	0	N9 L5b Cdh13	0	0	0	0	C11 L6a Sla	2.7687	0.164018	0
2610528J11Rik	66451	4	RIKEN cDNA 2610528J11 gene	protein-coding	0	0	N9 L5b Cdh13	0	0	0	0	C3 L4 Arf5	0.42	0.027893	0
2700012I20Rik	72588	9	RIKEN cDNA 2700012I20 gene	unknown	0	0	N3 L4 Arf5	0.756582	0.0290029	0	0	C6 L6a Car12	0.593846	0.163148	0.23465
2700029M09Rik	72612	8	histone PARylation factor 1	protein-coding	2	7	N8 L5 Chrna6	47.6218	0.219116	2	9	C8 L5 Chrna6	58.8011	0.0498529	0.18252
2700038G22Rik	67194	5	RIKEN cDNA 2700038G22 gene	ncRNA	0	0	N2 Sst Cbln4	17.8082	0.0900266	0	0	C3 L4 Arf5	3.29389	0.122924	0.666959
2700046A07Rik	78449	18	RIKEN cDNA 2700046A07 gene	ncRNA	0	0	N9 L5b Cdh13	0	0	0	0	C11 L6a Sla	0.159565	0.0434783	0
2700046G09Rik	67188	19	RIKEN cDNA 2700046G09 gene	ncRNA	0	0	N10 L5b Tph2	7.69187	0.147434	0	1	C10 L5b Tph2	3.24407	0.262223	0.312031
2700049A03Rik	76967	12	RIKEN cDNA 2700049A03 gene	protein-coding	1	6	N11 L6a Sla	8.59469	0.15963	2	9	C3 L4 Arf5	3.76178	0.169066	0.611401
2700054A10Rik	72578	17	RIKEN cDNA 2700054A10 gene	ncRNA	0	0	N3 L4 Arf5	3.15468	0.162169	2	1	C3 L4 Arf5	1.27022	0.288225	0.570686
2700060E02Rik	68045	14	RNA transcription, translation and transport factor	protein-coding	1	0	N1 Pvalb Wt1	40.7277	0.175399	2	9	C2 Sst Cbln4	129.236	0.057204	0.0608421
2700062C07Rik	68046	18	RIKEN cDNA 2700062C07 gene	protein-coding	2	9	N2 Sst Cbln4	64.4968	0.103187	2	9	C7 L6a Mgp	30.5424	0.133265	0.392396
2700068H02Rik	72563	4	RIKEN cDNA 2700068H02 gene	ncRNA	0	0	N3 L4 Arf5	3.17	0.0385059	0	0	C6 L6a Car12	0.973462	0.0745968	0.261964
2700069I18Rik	72608	3	RIKEN cDNA 2700069I18 gene	ncRNA	0	0	N9 L5b Cdh13	0	0.0243902	0	0	C6 L6a Car12	0.0276923	0.0384615	0
2700070H01Rik	72609	14	RIKEN cDNA 2700070H01 gene	ncRNA	0	0	N4 L5a Hsd11b1	0.0608475	0.0169492	0	0	C5 L5a Batf3	0.0284	0.02	0.0850662
2700081O15Rik	108899	19	RIKEN cDNA 2700081O15 gene	protein-coding	0	0	N6 L6a Car12	6.08585	0.124008	1	4	C3 L4 Arf5	3.63811	0.258912	0.44994
2700089E24Rik	381820	6	small integral membrane protein 10 like 1	protein-coding	1	3	N11 L6a Sla	42.5025	0.237975	2	9	C1 Pvalb Wt1	71.095	0.0344828	0.116393
2700089I24Rik	72647	19	RIKEN cDNA 2700089I24 gene	ncRNA	0	0	N9 L5b Cdh13	0	0.0281722	0	0	C11 L6a Sla	0	0.0902962	NA
2700094K13Rik	72657	2	selenoprotein H	protein-coding	0	0	N11 L6a Sla	24.5287	0.0980289	2	8	C11 L6a Sla	63.6465	0.293947	0.0575935
2700097O09Rik	72658	12	RIKEN cDNA 2700097O09 gene	protein-coding	2	5	N2 Sst Cbln4	57.9082	0.216044	2	9	C7 L6a Mgp	28.2471	0.177263	0.581562
2700099C18Rik	77022	17	NDC80 homolog, kinetochore complex component pseudogene	pseudo	0	2	N3 L4 Arf5	6.30671	0.289255	2	9	C9 L5b Cdh13	5.9869	0.178165	0.314287
2810001G20Rik	66456	11	RIKEN cDNA 2810001G20 gene	ncRNA	0	0	N2 Sst Cbln4	68.8509	0.067923	2	9	C1 Pvalb Wt1	42.7397	0.219731	0.378957
2810002D19Rik	66457	2	RIKEN cDNA 2810002D19 gene	ncRNA	0	0	N8 L5 Chrna6	24.3991	0.138919	1	0	C11 L6a Sla	12.993	0.202468	0.319951
2810004N23Rik	66523	8	RIKEN cDNA 2810004N23 gene	protein-coding	0	0	N2 Sst Cbln4	24.0495	0.174573	2	9	C2 Sst Cbln4	17.1722	0.247908	0.24116
2810007J24Rik	76971	7	sulfotransferase family 2A, dehydroepiandrosterone (DHEA)-preferring, member 8	protein-coding	0	0	N9 L5b Cdh13	0	0	0	0	C11 L6a Sla	0	0.0075188	NA
2810008D09Rik	76972	11	small nucleolar RNA host gene 20	ncRNA	2	9	N1 Pvalb Wt1	749.121	0.104711	2	9	C3 L4 Arf5	158.082	0.0403124	0.962865
2810013P06Rik	100503178	8	RIKEN cDNA 2810013P06 gene	ncRNA	0	0	N11 L6a Sla	56.6078	0.134811	2	9	C11 L6a Sla	21.5283	0.194716	0.569467
2810021J22Rik	69944	11	RIKEN cDNA 2810021J22 gene	protein-coding	0	0	N7 L6a Mgp	11.8289	0.108968	0	0	C7 L6a Mgp	2.51952	0.208584	0.573591
2810025M15Rik	69953	1	RIKEN cDNA 2810025M15 gene	ncRNA	1	1	N1 Pvalb Wt1	19.5666	0.230737	2	8	C1 Pvalb Wt1	47.4641	0.282272	0.103572
2810029C07Rik	100504687	12	RIKEN cDNA 2810029C07 gene	ncRNA	0	0	N6 L6a Car12	58.1137	0.183319	0	6	C11 L6a Sla	15.0904	0.250307	0.721367
2810030D12Rik	78335	8	RIKEN cDNA 2810030D12 gene	unknown	0	0	N9 L5b Cdh13	0	0	0	0	C4 L5a Hsd11b1	0.357744	0.0225564	0
2810032G03Rik	72669	12	RIKEN cDNA 2810032G03 gene	ncRNA	0	0	N11 L6a Sla	8.52344	0.0421761	0	1	C3 L4 Arf5	6.22733	0.226591	0.189584
2810039B14Rik	72665	15	RIKEN cDNA 2810039B14 gene	unknown	0	0	N5 L5a Batf3	0.253939	0.0242092	0	0	C2 Sst Cbln4	1.80043	0.130261	0.0102796
2810047C21Rik1	72716	7	RIKEN cDNA 2810047C21 gene 1	ncRNA	0	0	N9 L5b Cdh13	0	0	0	0	C11 L6a Sla	0	0	NA
2810049E08Rik	72677	13	RIKEN cDNA 2810049E08 gene	ncRNA	0	0	N2 Sst Cbln4	22.0791	0.0933318	2	6	C8 L5 Chrna6	6.50111	0.145297	0.799727
2810403A07Rik	74200	3	RIKEN cDNA 2810403A07 gene	protein-coding	2	9	N1 Pvalb Wt1	62.9357	0.107639	2	9	C3 L4 Arf5	24.227	0.0692124	0.659427
2810404M03Rik	69966	8	RIKEN cDNA 2810404M03 gene	ncRNA	0	0	N6 L6a Car12	0.345366	0.0953555	0	0	C9 L5b Cdh13	0.39	0.133721	0.0253899
2810405F15Rik	69974	2	RIKEN cDNA 2810405F15 gene	ncRNA	0	0	N8 L5 Chrna6	6.29727	0.121831	0	0	C11 L6a Sla	2.57261	0.214	0.619871
2810407A14Rik	100039901	16	RIKEN cDNA 2810407A14 gene	unknown	0	0	N9 L5b Cdh13	0	0	0	0	C4 L5a Hsd11b1	0.188571	0.0380155	0
2810408A11Rik	70419	11	RIKEN cDNA 2810408A11 gene	protein-coding	0	0	N8 L5 Chrna6	0.865455	0.0909091	0	0	C1 Pvalb Wt1	0.170313	0.0264881	0
2810408B13Rik	76371	13	RIKEN cDNA 2810408B13 gene	unknown	0	0	N6 L6a Car12	4.8261	0.0424838	0	0	C6 L6a Car12	1.32962	0.0485872	0.47979
2810408I11Rik	69941	1	RIKEN cDNA 2810408I11 gene	ncRNA	0	0	N6 L6a Car12	9.04268	0.0767369	0	0	C6 L6a Car12	3.34077	0.133908	0.255946
2810408M09Rik	NA	NA	NA	NA	0	0	N5 L5a Batf3	10.2321	0.0948532	2	9	C6 L6a Car12	10.9119	0.224829	0.181709
2810410L24Rik	100042332	11	RIKEN cDNA 2810410L24 gene	ncRNA	0	0	N4 L5a Hsd11b1	1.25424	0.0773361	0	0	C4 L5a Hsd11b1	0.801278	0.0978837	0.684449
2810416G20Rik	100040353	3	RIKEN cDNA 2810416G20 gene	protein-coding	0	0	N7 L6a Mgp	14.6516	0.210459	0	2	C7 L6a Mgp	18.6962	0.490757	0.198599
2810417H13Rik	68026	9	PCNA clamp associated factor	protein-coding	0	0	N6 L6a Car12	3.05293	0.146323	0	0	C3 L4 Arf5	1.38222	0.245254	0.345399
2810428I15Rik	66462	8	required for excision 1-B domain containing	protein-coding	0	0	N1 Pvalb Wt1	33.3811	0.14116	2	9	C1 Pvalb Wt1	97.6922	0.138275	0.0730878
2810429I04Rik	76937	13	RIKEN cDNA 2810429I04 gene	ncRNA	0	0	N1 Pvalb Wt1	19.0914	0.153526	1	2	C1 Pvalb Wt1	3.34625	0.292922	0.538857
2810433D01Rik	77132	11	RIKEN cDNA 2810433D01 gene	ncRNA	0	0	N9 L5b Cdh13	0	0.0672235	0	0	C2 Sst Cbln4	0.0213043	0.112819	0
2810442N19Rik	72753	1	RIKEN cDNA 2810442N19 gene	ncRNA	0	0	N4 L5a Hsd11b1	3.72169	0.175501	0	0	C3 L4 Arf5	0.921333	0.206914	0.513767
2810454H06Rik	72813	6	RIKEN cDNA 2810454H06 gene	ncRNA	0	0	N1 Pvalb Wt1	4.93114	0.0836141	0	0	C8 L5 Chrna6	2.92	0.186508	0.380327
2810459M11Rik	72792	1	RIKEN cDNA 2810459M11 gene	protein-coding	0	0	N5 L5a Batf3	4.08242	0.101703	0	1	C5 L5a Batf3	2.7048	0.439442	0.355218
2810468N07Rik	72834	17	RIKEN cDNA 2810468N07 gene	ncRNA	0	0	N5 L5a Batf3	34.9145	0.201795	1	5	C5 L5a Batf3	27.8226	0.53586	0.217869
2810471M01Rik	72818	11	RIKEN cDNA 2810471M01 gene	ncRNA	0	0	N9 L5b Cdh13	0	0	0	0	C11 L6a Sla	0	0.0424454	NA
2810474O19Rik	67246	6	RIKEN cDNA 2810474O19 gene	protein-coding	1	2	N7 L6a Mgp	20.9589	0.112105	2	9	C3 L4 Arf5	7.901	0.138017	0.604137
2900005J15Rik	67261	5	RIKEN cDNA 2900005J15 gene	ncRNA	0	0	N1 Pvalb Wt1	11.9826	0.128752	0	0	C5 L5a Batf3	3.0358	0.236778	0.406437
2900009J06Rik	100502745	1	RIKEN cDNA 2900009J06 gene	ncRNA	0	0	N10 L5b Tph2	8.22594	0.171519	0	4	C8 L5 Chrna6	13.5456	0.340879	0.126183
2900011O08Rik	67254	16	RIKEN cDNA 2900011O08 gene	protein-coding	2	9	N8 L5 Chrna6	110.775	0.0871881	2	9	C11 L6a Sla	223.151	0	0.0873396
2900026A02Rik	243219	5	RIKEN cDNA 2900026A02 gene	protein-coding	0	9	N11 L6a Sla	6.44906	0.355037	0	9	C4 L5a Hsd11b1	7.64271	0.478945	0.339223
2900040C04Rik	72893	14	RIKEN cDNA 2900040C04 gene	unknown	0	0	N9 L5b Cdh13	0	0	0	0	C11 L6a Sla	0	0	NA
2900041M22Rik	78403	11	RIKEN cDNA 2900041M22 gene	ncRNA	0	0	N10 L5b Tph2	4.77156	0.0600964	0	0	C11 L6a Sla	2.47217	0.122734	0.218161
2900052N01Rik	73040	9	RIKEN cDNA 2900052N01 gene	ncRNA	0	0	N6 L6a Car12	0.282195	0.0243902	0	0	C9 L5b Cdh13	1.37276	0.0322185	0
2900055J20Rik	73001	18	RIKEN cDNA 2900055J20 gene	ncRNA	2	8	N6 L6a Car12	830.474	0.392225	2	9	C3 L4 Arf5	335.558	0.162266	0.907884
2900057B20Rik	73009	18	RIKEN cDNA 2900057B20 gene	ncRNA	0	0	N9 L5b Cdh13	0	0.0338983	0	0	C11 L6a Sla	0	0.0150376	NA
2900060B14Rik	68204	1	RIKEN cDNA 2900060B14 gene	ncRNA	0	0	N11 L6a Sla	7.98281	0.0922019	0	6	C8 L5 Chrna6	11.1456	0.232719	0.117752
2900076A07Rik	100504421	7	RIKEN cDNA 2900076A07 gene	ncRNA	0	1	N11 L6a Sla	62.3056	0.225029	2	9	C3 L4 Arf5	23.1699	0.192714	0.690495
2900079G21Rik	620760	9	RIKEN cDNA 2900079G21 gene	ncRNA	0	9	N4 L5a Hsd11b1	10.4297	0.70511	0	9	C3 L4 Arf5	8.06189	0.891287	0.484111
2900089D17Rik	67277	5	RIKEN cDNA 2900089D17 gene	ncRNA	0	0	N6 L6a Car12	0.605122	0.0876723	0	0	C5 L5a Batf3	0.252	0.187728	0.279569
2900092C05Rik	73090	7	RIKEN cDNA 2900092C05 gene	protein-coding	0	0	N8 L5 Chrna6	1.34909	0.0582861	0	0	C6 L6a Car12	0.0996154	0.0442637	0
2900092D14Rik	73100	1	RIKEN cDNA 2900092D14 gene	ncRNA	0	0	N2 Sst Cbln4	20.6159	0.207335	1	6	C3 L4 Arf5	22.9302	0.494499	0.343131
2900097C17Rik	347740	2	RIKEN cDNA 2900097C17 gene	ncRNA	2	8	N8 L5 Chrna6	32.55	0.256593	2	9	C8 L5 Chrna6	42.7856	0.0264284	0.139857
3000002C10Rik	378954	9	glyceraldehyde-3-phosphate dehydrogenase pseudogene	pseudo	0	0	N6 L6a Car12	18.8393	0.112746	1	3	C4 L5a Hsd11b1	6.82226	0.233103	0.574479
3010003L21Rik	109163	6	RIKEN cDNA 3010003L21 gene	ncRNA	0	0	N9 L5b Cdh13	0	0	0	0	C2 Sst Cbln4	0.406522	0.0421177	0
3010026O09Rik	68067	11	MRN complex interacting protein	protein-coding	0	0	N6 L6a Car12	15.491	0.154473	2	6	C2 Sst Cbln4	10.0235	0.304526	0.205519
3010033K07Rik	109215	8	brown adipose tissue enriched long non-coding RNA 1	ncRNA	0	0	N9 L5b Cdh13	0	0	0	0	C2 Sst Cbln4	0.313043	0.0434783	0
3100003L05Rik	73076	7	RIKEN cDNA 3100003L05 gene	ncRNA	0	0	N9 L5b Cdh13	0	0.0305412	0	0	C7 L6a Mgp	0.385714	0.091303	0
3110001I22Rik	67118	16	bifunctional apoptosis regulator	protein-coding	1	4	N11 L6a Sla	7.65344	0.253117	2	7	C8 L5 Chrna6	4.73556	0.399531	0.240366
3110002H16Rik	76482	18	RIKEN cDNA 3110002H16 gene	protein-coding	1	2	N1 Pvalb Wt1	47.3891	0.172101	2	9	C1 Pvalb Wt1	35.0616	0.226874	0.30494
3110009E18Rik	73103	1	RIKEN cDNA 3110009E18 gene	protein-coding	0	0	N7 L6a Mgp	2.63579	0.1033	0	0	C2 Sst Cbln4	2.0987	0.166797	0.198407
3110009F21Rik	67280	12	RIKEN cDNA 3110009F21 gene	ncRNA	0	0	N9 L5b Cdh13	0	0	0	0	C11 L6a Sla	0	0	NA
3110009M11Rik	73079	7	RIKEN cDNA 3110009M11 gene	unknown	0	0	N7 L6a Mgp	6.77105	0.0434946	0	0	C2 Sst Cbln4	0.813478	0.0787675	0
3110015C05Rik	73129	13	RIKEN cDNA 3110015C05 gene	ncRNA	0	0	N9 L5b Cdh13	0	0.0169492	0	0	C4 L5a Hsd11b1	0.744586	0.0158043	0
3110021A11Rik	67289	6	RIKEN cDNA 3110021A11 gene	ncRNA	0	0	N11 L6a Sla	16.1844	0.0991369	0	0	C3 L4 Arf5	4.71411	0.117931	0.58266
3110021N24Rik	NA	NA	NA	NA	2	9	N2 Sst Cbln4	48.7741	0.147711	2	9	C2 Sst Cbln4	11.93	0.0881589	0.702787
3110035E14Rik	76982	1	RIKEN cDNA 3110035E14 gene	protein-coding	0	8	N7 L6a Mgp	203.437	0.673268	0	8	C7 L6a Mgp	443.752	0.854273	0.1301
3110039I08Rik	73144	9	RIKEN cDNA 3110039I08 gene	ncRNA	1	1	N2 Sst Cbln4	19.2877	0.166956	1	8	C11 L6a Sla	6.50783	0.251129	0.582029
3110039M20Rik	67293	12	RIKEN cDNA 3110039M20 gene	ncRNA	1	4	N1 Pvalb Wt1	36.4843	0.275463	2	9	C8 L5 Chrna6	47.92	0.142091	0.24525
3110040M04Rik	73176	1	RIKEN cDNA 3110040M04 gene	protein-coding	0	0	N9 L5b Cdh13	0	0	0	0	C11 L6a Sla	0	0	NA
3110040N11Rik	67290	7	RIKEN cDNA 3110040N11 gene	protein-coding	0	0	N10 L5b Tph2	7.9575	0.13598	2	8	C11 L6a Sla	10.5378	0.299048	0.146246
3110043O21Rik	73205	4	RIKEN cDNA 3110043O21 gene	protein-coding	0	2	N7 L6a Mgp	25.29	0.176054	2	9	C2 Sst Cbln4	13.9596	0.247738	0.336988
3110045C21Rik	67303	1	RIKEN cDNA 3110045C21 gene	ncRNA	0	0	N9 L5b Cdh13	4.01471	0.0283495	0	0	C11 L6a Sla	6.77087	0.159312	0.0697776
3110052M02Rik	73229	17	zinc finger protein 983	protein-coding	1	6	N7 L6a Mgp	31.6605	0.120105	2	9	C3 L4 Arf5	11.4587	0.115914	0.570741
3110053B16Rik	382686	12	RIKEN cDNA 3110053B16 gene	unknown	1	0	N1 Pvalb Wt1	10.6131	0.161253	2	9	C5 L5a Batf3	8.5672	0.165102	0.181851
3110056K07Rik	73204	12	RIKEN cDNA 3110056K07 gene	ncRNA	2	9	N2 Sst Cbln4	75.1618	0.130557	2	9	C3 L4 Arf5	20.2643	0.0457083	0.765504
3110057O12Rik	269423	3	abhydrolase domain containing 18	protein-coding	2	9	N11 L6a Sla	28.9612	0.106298	2	9	C11 L6a Sla	8.34696	0.0929528	0.755122
3110062M04Rik	78412	6	RIKEN cDNA 3110062M04 gene	protein-coding	0	0	N7 L6a Mgp	6.95421	0.15742	1	5	C11 L6a Sla	2.40826	0.182596	0.426606
3110070M22Rik	67304	13	RIKEN cDNA 3110070M22 gene	ncRNA	0	0	N5 L5a Batf3	3.22818	0.0549835	0	0	C11 L6a Sla	5.25043	0.169951	0.180433
3110079O15Rik	73234	1	RIKEN cDNA 3110079O15 gene	protein-coding	0	0	N5 L5a Batf3	2.13747	0.125163	0	0	C5 L5a Batf3	8.0706	0.242603	0.078645
3110082I17Rik	73212	5	RIKEN cDNA 3110082I17 gene	protein-coding	0	8	N7 L6a Mgp	22.0311	0.280421	2	9	C7 L6a Mgp	18.7933	0.240863	0.365734
3110082J24Rik	433868	5	RIKEN cDNA 3110082J24 gene	protein-coding	0	0	N9 L5b Cdh13	0	0	0	0	C11 L6a Sla	0	0	NA
3110099E03Rik	100043232	2	RIKEN cDNA 3110099E03 gene	ncRNA	0	0	N9 L5b Cdh13	0	0	0	0	C11 L6a Sla	0	0	NA
3200001D21Rik	71818	12	RIKEN cDNA 3200001D21 gene	ncRNA	0	0	N9 L5b Cdh13	6.28176	0.140588	1	0	C1 Pvalb Wt1	1.32125	0.306068	0.475804
3300002A11Rik	100503812	12	RIKEN cDNA 3300002A11 gene	unknown	0	0	N5 L5a Batf3	0.313939	0.0783256	0	0	C8 L5 Chrna6	1.41889	0.0858783	0
3300002I08Rik	69277	2	RIKEN cDNA 3300002I08 gene	protein-coding	0	0	N11 L6a Sla	4.77344	0.183428	0	8	C7 L6a Mgp	3.62762	0.177194	0.400472
3300002P13Rik	70230	7	RIKEN cDNA 3300002P13 gene	ncRNA	0	0	N2 Sst Cbln4	43.0023	0.283768	2	3	C2 Sst Cbln4	14.8813	0.48509	0.428721
3300005D01Rik	78512	17	RIKEN cDNA 3300005D01 gene	ncRNA	0	0	N2 Sst Cbln4	0.389091	0.0454545	0	0	C11 L6a Sla	0	0	0
3425401B19Rik	100504518	14	RIKEN cDNA 3425401B19 gene	protein-coding	0	0	N6 L6a Car12	0.0912195	0.0200878	0	0	C11 L6a Sla	0	0.0075188	0
3632451O06Rik	67419	14	RIKEN cDNA 3632451O06 gene	protein-coding	0	1	N9 L5b Cdh13	17.1694	0.194879	2	9	C11 L6a Sla	18.327	0.242898	0.228672
3830406C13Rik	218734	14	RIKEN cDNA 3830406C13 gene	protein-coding	0	4	N5 L5a Batf3	12.2426	0.17009	2	9	C8 L5 Chrna6	18.7567	0.200623	0.151753
3830408C21Rik	100040322	13	RIKEN cDNA 3830408C21 gene	ncRNA	0	0	N2 Sst Cbln4	4.65591	0.0723926	0	0	C3 L4 Arf5	1.92922	0.14651	0.25752
3830432H09Rik	320069	1	RIKEN cDNA 3830432H09 gene	ncRNA	0	0	N3 L4 Arf5	0.718101	0.0126582	0	0	C4 L5a Hsd11b1	0.254436	0.0336009	0.0566039
3930402G23Rik	665306	8	RIKEN cDNA 3930402G23 gene	ncRNA	0	0	N6 L6a Car12	2.41488	0.0243902	0	0	C4 L5a Hsd11b1	0.263835	0.0300752	0
4430402I18Rik	381218	19	RIKEN cDNA 4430402I18 gene	protein-coding	2	7	N10 L5b Tph2	3.65031	0.364504	2	9	C8 L5 Chrna6	1.41	0.156867	0.425111
4631405J19Rik	433456	2	RIKEN cDNA 4631405J19 gene	ncRNA	0	0	N5 L5a Batf3	0.0336364	0.0114127	0	0	C3 L4 Arf5	0.027	0.0111111	0.233886
4631405K08Rik	70800	1	RIKEN cDNA 4631405K08 gene	unknown	0	0	N3 L4 Arf5	0.87519	0.0283334	0	0	C11 L6a Sla	0	0.0163927	0
4632404H12Rik	74034	3	RIKEN cDNA 4632404H12 gene	ncRNA	0	0	N9 L5b Cdh13	8.34676	0.0870046	1	4	C1 Pvalb Wt1	5.18156	0.269339	0.337197
4632415L05Rik	70808	3	RRS1 ribosome biogenesis regulator homolog pseudogene	pseudo	0	0	N6 L6a Car12	8.09512	0.13723	2	8	C1 Pvalb Wt1	7.68375	0.255143	0.268868
4632427E13Rik	666737	7	RIKEN cDNA 4632427E13 gene	ncRNA	0	3	N9 L5b Cdh13	108.693	0.202113	2	8	C3 L4 Arf5	29.0012	0.263742	0.745732
4632428C04Rik	100043102	16	RIKEN cDNA 4632428C04 gene	ncRNA	0	0	N5 L5a Batf3	0.430606	0.0651006	0	0	C1 Pvalb Wt1	1.98969	0.255407	0.0513315
4632428N05Rik	74048	10	V-set immunoregulatory receptor	protein-coding	0	0	N2 Sst Cbln4	7.48091	0.056056	0	0	C4 L5a Hsd11b1	0.0740602	0.0490906	0
4732414G09Rik	100043309	11	RIKEN cDNA 4732414G09 gene	unknown	0	0	N7 L6a Mgp	4.16842	0.0560501	0	0	C10 L5b Tph2	1.27926	0.319541	0.19232
4732416N19Rik	320737	6	RIKEN cDNA 4732416N19 gene	ncRNA	0	0	N4 L5a Hsd11b1	6.27153	0.110094	0	1	C11 L6a Sla	6.55696	0.249964	0.335038
4732419C18Rik	100042484	8	RIKEN cDNA 4732419C18 gene	ncRNA	0	0	N10 L5b Tph2	0.315625	0.0379079	0	0	C7 L6a Mgp	0.212381	0.0335797	0.23436
4732440D04Rik	654788	1	RIKEN cDNA 4732440D04 gene	unknown	0	0	N7 L6a Mgp	11.0663	0.140376	0	5	C3 L4 Arf5	2.11022	0.257509	0.700718
4732456N10Rik	239673	15	keratin 90	protein-coding	0	0	N7 L6a Mgp	0.0415789	0.0526316	0	0	C11 L6a Sla	0.363043	0.0366107	0
4732465J04Rik	414105	10	RIKEN cDNA 4732465J04 gene	unknown	0	0	N9 L5b Cdh13	0	0.0210669	0	0	C11 L6a Sla	0	0.0146335	NA
4732471J01Rik	654804	7	RIKEN cDNA 4732471J01 gene	ncRNA	2	9	N11 L6a Sla	9.51594	0.118512	2	9	C7 L6a Mgp	3.77524	0.0731751	0.562808
4732490B19Rik	319871	11	RIKEN cDNA 4732490B19 gene	ncRNA	0	0	N9 L5b Cdh13	0	0.0243902	0	0	C4 L5a Hsd11b1	0.0893985	0.0075188	0
4732491K20Rik	224523	17	RIKEN cDNA 4732491K20 gene	ncRNA	0	0	N1 Pvalb Wt1	6.926	0.209207	2	5	C1 Pvalb Wt1	4.07844	0.252477	0.213776
4831407H17Rik	77710	14	RIKEN cDNA 4831407H17 gene	ncRNA	0	0	N1 Pvalb Wt1	3.79171	0.0624017	0	0	C5 L5a Batf3	1.578	0.144074	0.226406
4831440D22Rik	320798	8	RIKEN cDNA 4831440D22 gene	ncRNA	0	0	N7 L6a Mgp	12.3168	0.140406	0	0	C3 L4 Arf5	4.04533	0.131006	0.602507
4831440E17Rik	320965	5	RIKEN cDNA 4831440E17 gene	ncRNA	0	0	N7 L6a Mgp	24.4353	0.177665	0	2	C9 L5b Cdh13	2.68793	0.193695	0.785782
4833403I15Rik	74574	18	laeverin	protein-coding	0	0	N6 L6a Car12	0.219024	0.0281899	0	0	C4 L5a Hsd11b1	0.0144361	0.040536	0
4833411C07Rik	71624	8	RIKEN cDNA 4833411C07 gene	ncRNA	0	0	N5 L5a Batf3	1.43798	0.0390417	0	0	C4 L5a Hsd11b1	0.481579	0.0431976	0.353773
4833412C05Rik	73904	7	RIKEN cDNA 4833412C05 gene	ncRNA	0	0	N5 L5a Batf3	4.51293	0.0653402	0	0	C7 L6a Mgp	5.21762	0.183081	0.103158
4833415N18Rik	73761	16	RIKEN cDNA 4833415N18 gene	ncRNA	0	0	N9 L5b Cdh13	6.52647	0.0632748	0	1	C9 L5b Cdh13	11.1803	0.404478	0.110337
4833417C18Rik	73906	11	RIKEN cDNA 4833417C18 gene	ncRNA	0	0	N6 L6a Car12	11.4834	0.0347608	0	0	C3 L4 Arf5	2.68689	0.071374	0.486879
4833418N02Rik	74597	17	RIKEN cDNA 4833418N02 gene	ncRNA	0	0	N9 L5b Cdh13	0.799118	0.0241298	0	0	C9 L5b Cdh13	0.874483	0.146773	0.167712
4833419F23Rik	73915	18	RIKEN cDNA 4833419F23 gene	ncRNA	0	0	N9 L5b Cdh13	0	0.0134841	0	0	C7 L6a Mgp	2.33667	0.0825752	0
4833420G17Rik	67392	13	RIKEN cDNA 4833420G17 gene	protein-coding	2	9	N7 L6a Mgp	61.8405	0.166048	2	9	C7 L6a Mgp	19.0424	0.0775488	0.654335
4833422C13Rik	373852	13	RIKEN cDNA 4833422C13 gene	ncRNA	1	6	N9 L5b Cdh13	18.5388	0.272659	2	9	C9 L5b Cdh13	9.21862	0.197469	0.438199
4833422M21Rik	75768	15	RIKEN cDNA 4833422M21 gene	ncRNA	0	0	N9 L5b Cdh13	0	0.0706264	0	0	C3 L4 Arf5	0.261111	0.0851783	0
4833423E24Rik	228151	2	RIKEN cDNA 4833423E24 gene	protein-coding	0	0	N9 L5b Cdh13	0	0	0	0	C11 L6a Sla	0	0.03125	NA
4833427F10Rik	74601	17	RIKEN cDNA 4833427F10 gene	ncRNA	0	0	N9 L5b Cdh13	0	0	0	0	C11 L6a Sla	0	0	NA
4833427G06Rik	235345	9	RIKEN cDNA 4833427G06 gene	protein-coding	0	0	N9 L5b Cdh13	0	0.0285714	0	0	C10 L5b Tph2	0.701111	0.0800356	0
4833428L15Rik	74602	9	RIKEN cDNA 4833428L15 gene	ncRNA	0	0	N9 L5b Cdh13	0	0	0	0	C11 L6a Sla	0	0.037037	NA
4833438C02Rik	100503392	19	RIKEN cDNA 4833438C02 gene	unknown	0	0	N7 L6a Mgp	4.71474	0.0592568	0	0	C11 L6a Sla	2.63913	0.113923	0.271369
4833439L19Rik	97820	13	RIKEN cDNA 4833439L19 gene	protein-coding	1	4	N6 L6a Car12	56.86	0.186614	2	9	C5 L5a Batf3	89.9982	0.0725922	0.113059
4833447I15Rik	74844	17	RIKEN cDNA 4833447I15 gene	ncRNA	0	0	N8 L5 Chrna6	4.68273	0.108641	0	0	C8 L5 Chrna6	1.22	0.200054	0.659092
4833447P13Rik	78902	6	RIKEN cDNA 4833447P13 gene	unknown	0	0	N3 L4 Arf5	0.786582	0.0240481	0	0	C2 Sst Cbln4	0.662174	0.0733502	0.0675969
4921501E09Rik	74042	17	RIKEN cDNA 4921501E09 gene	protein-coding	0	0	N7 L6a Mgp	4.64	0.0440246	0	0	C3 L4 Arf5	0.504778	0.0210594	0
4921504A21Rik	70832	5	RIKEN cDNA 4921504A21 gene	ncRNA	0	1	N10 L5b Tph2	26.7181	0.399812	2	3	C10 L5b Tph2	7.76704	0.601372	0.453004
4921504E06Rik	70909	2	RIKEN cDNA 4921504E06 gene	protein-coding	0	0	N9 L5b Cdh13	0.0979412	0.0267815	0	0	C6 L6a Car12	0.0215385	0.0671042	0.329779
4921506M07Rik	70846	12	tetratricopeptide repeat domain 6	protein-coding	0	0	N5 L5a Batf3	0.0750505	0.0228536	0	0	C11 L6a Sla	0	0	0
4921507G05Rik	66709	12	RIKEN cDNA 4921507G05 gene	unknown	0	0	N5 L5a Batf3	0.535758	0.010101	0	0	C11 L6a Sla	1.26609	0.0692536	0
4921507L20Rik	70852	2	alkB homolog 3, opposite strand 1	ncRNA	0	0	N7 L6a Mgp	5.33684	0.134604	0	0	C11 L6a Sla	1.58435	0.10304	0.520326
4921507P07Rik	70821	6	RIKEN cDNA 4921507P07 gene	protein-coding	0	0	N7 L6a Mgp	5.43632	0.15405	0	0	C3 L4 Arf5	1.15011	0.167421	0.225057
4921508D12Rik	70845	2	RIKEN cDNA 4921508D12 gene	ncRNA	0	0	N9 L5b Cdh13	0	0	0	0	C11 L6a Sla	0	0.101852	NA
4921509C19Rik	381393	2	RIKEN cDNA 4921509C19 gene	protein-coding	0	0	N11 L6a Sla	0.006875	0.0572701	0	0	C9 L5b Cdh13	0.0393103	0.046691	0.0200279
4921509O07Rik	70917	13	RIKEN cDNA 4921509O07 gene	ncRNA	0	0	N9 L5b Cdh13	0	0.0290062	0	0	C1 Pvalb Wt1	0.342187	0.02853	0
4921511C10Rik	70924	3	RIKEN cDNA 4921511C10 gene	ncRNA	2	6	N5 L5a Batf3	5.90848	0.314633	2	8	C3 L4 Arf5	1.38256	0.2034	0.674089
4921511H03Rik	70920	5	testis expressed 47	protein-coding	0	0	N9 L5b Cdh13	9.63971	0.203036	0	0	C8 L5 Chrna6	1.73667	0.294051	0.484837
4921511I17Rik	70858	12	RIKEN cDNA 4921511I17 gene	ncRNA	0	2	N8 L5 Chrna6	1.99273	0.246466	2	8	C7 L6a Mgp	3.02524	0.518253	0.154917
4921513H07Rik	100504457	6	RIKEN cDNA 4921513H07 gene	unknown	0	0	N4 L5a Hsd11b1	1.55559	0.100208	0	0	C3 L4 Arf5	1.67067	0.173591	0.511763
4921513I03Rik	70874	10	RIKEN cDNA 4921513I03 gene	ncRNA	0	0	N10 L5b Tph2	1.06281	0.0779	0	0	C1 Pvalb Wt1	0.242188	0.0949252	0.358238
4921515E04Rik	70886	15	RIKEN cDNA 4921515E04 gene	ncRNA	0	0	N1 Pvalb Wt1	0.0174286	0.0363389	0	0	C2 Sst Cbln4	0.0356522	0.0421904	0
4921517D16Rik	70876	16	RIKEN cDNA 4921517D16 gene	ncRNA	0	0	N4 L5a Hsd11b1	0.00474576	0.0360586	0	0	C7 L6a Mgp	0.519524	0.039947	0.00309054
4921517D22Rik	70900	13	RIKEN cDNA 4921517D22 gene	protein-coding	0	0	N5 L5a Batf3	0.00313131	0	0	0	C11 L6a Sla	0.01	0	0.0195231
4921518K17Rik	78758	12	RIKEN cDNA 4921518K17 gene	ncRNA	0	0	N11 L6a Sla	0.00875	0.0258407	0	0	C3 L4 Arf5	0.00544444	0	0
4921524J17Rik	66714	8	RIKEN cDNA 4921524J17 gene	protein-coding	0	0	N1 Pvalb Wt1	19.2186	0.105154	2	9	C6 L6a Car12	31.8046	0.146913	0.148771
4921524L21Rik	70901	18	RIKEN cDNA 4921524L21 gene	protein-coding	0	0	N4 L5a Hsd11b1	0.0138983	0.0826634	0	0	C4 L5a Hsd11b1	0.00203008	0	1
4921525O09Rik	74050	13	RIKEN cDNA 4921525O09 gene	ncRNA	0	0	N9 L5b Cdh13	0	0	0	0	C11 L6a Sla	0	0.0384615	NA
4921528I07Rik	77049	9	RIKEN cDNA 4921528I07 gene	protein-coding	0	0	N9 L5b Cdh13	0	0.0388467	0	0	C11 L6a Sla	0	0.0332306	NA
4921529L05Rik	320178	6	RIKEN cDNA 4921529L05 gene	ncRNA	0	0	N11 L6a Sla	0.015	0	0	0	C4 L5a Hsd11b1	0.151504	0.0150376	0
4921530L21Rik	66732	14	RIKEN cDNA 4921530L21 gene	protein-coding	0	0	N5 L5a Batf3	0.141818	0.010101	0	0	C11 L6a Sla	0	0	0
4921531C22Rik	66730	2	RIKEN cDNA 4921531C22 gene	ncRNA	0	0	N11 L6a Sla	15.1841	0.0772418	0	0	C4 L5a Hsd11b1	3.03316	0.106854	0.694606
4921531P14Rik	70960	18	RIKEN cDNA 4921531P14 gene	ncRNA	0	0	N9 L5b Cdh13	0	0.0240481	0	0	C11 L6a Sla	0	0.0727257	NA
4921533I20Rik	664619	18	PRP18 pre-mRNA processing factor 18 homolog pseudogene	pseudo	0	0	N9 L5b Cdh13	0	0	0	0	C11 L6a Sla	0	0	NA
4921534H16Rik	66737	9	RIKEN cDNA 4921534H16 gene	ncRNA	0	0	N8 L5 Chrna6	9.30545	0.0856294	0	0	C1 Pvalb Wt1	0.513437	0.200578	0.49082
4921536K21Rik	67430	11	RIKEN cDNA 4921536K21 gene	protein-coding	0	0	N3 L4 Arf5	0.397595	0.0253165	0	0	C4 L5a Hsd11b1	0.0660902	0.0257018	0
4921539E11Rik	70941	4	RIKEN cDNA 4921539E11 gene	protein-coding	0	0	N1 Pvalb Wt1	0.318571	0.0392554	0	0	C11 L6a Sla	0.216087	0.0425152	0
4921539H07Rik	78256	3	RIKEN cDNA 4921539H07 gene	protein-coding	0	0	N3 L4 Arf5	4.11772	0.0740942	0	0	C4 L5a Hsd11b1	1.04353	0.147487	0.672893
4922502D21Rik	381816	6	RIKEN cDNA 4922502D21 gene	protein-coding	0	0	N9 L5b Cdh13	0	0	0	0	C11 L6a Sla	0	0	NA
4922502H24Rik	78136	13	RIKEN cDNA 4922502H24 gene	ncRNA	0	0	N4 L5a Hsd11b1	0.0583051	0	0	0	C11 L6a Sla	0	0	0
4922502N22Rik	70962	6	RIKEN cDNA 4922502N22 gene	ncRNA	0	0	N9 L5b Cdh13	0	0	0	0	C11 L6a Sla	0	0	NA
4930401C15Rik	73803	10	RIKEN cDNA 4930401C15 gene	ncRNA	0	0	N5 L5a Batf3	0.596364	0.166017	0	0	C10 L5b Tph2	0.333333	0.194501	0
4930401G09Rik	73792	5	RIKEN cDNA 4930401G09 gene	protein-coding	0	0	N10 L5b Tph2	0.982187	0.217385	0	1	C1 Pvalb Wt1	0.401562	0.244138	0.38158
4930401O10Rik	73816	11	RIKEN cDNA 4930401O10 gene	ncRNA	0	0	N9 L5b Cdh13	0	0	0	0	C11 L6a Sla	0.393913	0.0434783	0
4930401O12Rik	73924	13	RIKEN cDNA 4930401O12 gene	ncRNA	0	0	N9 L5b Cdh13	0	0.010101	0	0	C11 L6a Sla	0	0.038424	NA
4930402D18Rik	74852	15	RIKEN cDNA 4930402D18 gene	ncRNA	0	0	N9 L5b Cdh13	0	0	0	0	C11 L6a Sla	0	0	NA
4930402F06Rik	74854	2	RIKEN cDNA 4930402F06 gene	protein-coding	0	0	N9 L5b Cdh13	0	0	0	0	C11 L6a Sla	0	0	NA
4930402F11Rik	73796	7	RIKEN cDNA 4930402F11 gene	ncRNA	0	0	N9 L5b Cdh13	0	0	0	0	C11 L6a Sla	0	0	NA
4930402H24Rik	228602	2	RIKEN cDNA 4930402H24 gene	protein-coding	2	9	N9 L5b Cdh13	36.6212	0.0579087	2	9	C4 L5a Hsd11b1	14.7023	0.0434783	0.855404
4930403D09Rik	319208	11	RIKEN cDNA 4930403D09 gene	ncRNA	0	0	N9 L5b Cdh13	0	0	0	0	C11 L6a Sla	0	0	NA
4930404A05Rik	73820	16	RIKEN cDNA 4930404A05 gene	ncRNA	0	0	N9 L5b Cdh13	0	0	0	0	C11 L6a Sla	0	0	NA
4930404H11Rik	73815	12	RIKEN cDNA 4930404H11 gene	ncRNA	0	0	N4 L5a Hsd11b1	3.04407	0.0429194	0	0	C3 L4 Arf5	4.57178	0.0723567	0.213097
4930404H24Rik	78151	2	RIKEN cDNA 4930404H24 gene	unknown	0	0	N7 L6a Mgp	2.18737	0.0954102	0	0	C4 L5a Hsd11b1	0.522256	0.0946676	0.20885
4930404I05Rik	67394	16	RIKEN cDNA 4930404I05 gene	ncRNA	0	0	N3 L4 Arf5	12.9762	0.107083	0	0	C6 L6a Car12	2.19038	0.0824085	0.571378
4930404I20Rik	73918	6	RIKEN cDNA 4930404I20 gene	ncRNA	0	0	N9 L5b Cdh13	0	0	0	0	C11 L6a Sla	0	0	NA
4930404K13Rik	74845	14	RIKEN cDNA 4930404K13 gene	ncRNA	0	4	N4 L5a Hsd11b1	9.05203	0.414804	0	4	C3 L4 Arf5	5.71267	0.511054	0.706514
4930404N11Rik	432479	10	RIKEN cDNA 4930404N11 gene	protein-coding	0	0	N1 Pvalb Wt1	4.01857	0.0748364	0	0	C4 L5a Hsd11b1	2.91827	0.213847	0.22888
4930405A10Rik	74896	14	RIKEN cDNA 4930405A10 gene	ncRNA	0	0	N9 L5b Cdh13	0	0.044569	0	0	C1 Pvalb Wt1	0.060625	0.0373971	0
4930405A21Rik	74846	2	RIKEN cDNA 4930405A21 gene	ncRNA	0	0	N11 L6a Sla	8.21781	0.172367	1	3	C3 L4 Arf5	1.877	0.233832	0.537736
4930405D01Rik	73795	16	RIKEN cDNA 4930405D01 gene	ncRNA	0	0	N9 L5b Cdh13	0	0	0	0	C11 L6a Sla	0	0	NA
4930405D11Rik	73922	11	RIKEN cDNA 4930405D11 gene	ncRNA	0	0	N9 L5b Cdh13	0	0.010101	0	0	C11 L6a Sla	0	0.0398761	NA
4930405J17Rik	73811	10	RIKEN cDNA 4930405J17 gene	ncRNA	0	0	N4 L5a Hsd11b1	0.727458	0.0393128	0	0	C3 L4 Arf5	0.654444	0.0398208	0.16686
4930405L22Rik	78106	5	RIKEN cDNA 4930405L22 gene	ncRNA	0	0	N9 L5b Cdh13	0	0	0	0	C11 L6a Sla	0	0	NA
4930405O22Rik	414079	17	RIKEN cDNA 4930405O22 gene	ncRNA	0	0	N1 Pvalb Wt1	4.17771	0.137018	0	0	C3 L4 Arf5	1.90211	0.194232	0.546477
4930406D18Rik	73806	3	RIKEN cDNA 4930406D18 gene	ncRNA	0	0	N9 L5b Cdh13	0	0	0	0	C11 L6a Sla	0	0	NA
4930407G08Rik	77223	4	RIKEN cDNA 4930407G08 gene	ncRNA	0	0	N9 L5b Cdh13	0	0	0	0	C6 L6a Car12	0.314231	0.0332306	0
4930407I02Rik	78451	6	RIKEN cDNA 4930407I02 gene	ncRNA	0	0	N1 Pvalb Wt1	1.23	0.0533476	0	0	C7 L6a Mgp	1.50905	0.318825	0.019686
4930407I10Rik	328573	15	RIKEN cDNA 4930407I10 gene	protein-coding	0	0	N9 L5b Cdh13	0	0	0	0	C11 L6a Sla	0	0	NA
4930407I19Rik	77198	10	RIKEN cDNA 4930407I19 gene	ncRNA	0	0	N9 L5b Cdh13	0	0.0210669	0	0	C6 L6a Car12	0.0292308	0.0958721	0
4930412B13Rik	73938	2	RIKEN cDNA 4930412B13 gene	ncRNA	0	0	N9 L5b Cdh13	0	0.0258407	0	0	C4 L5a Hsd11b1	0.00842105	0.0225564	0
4930412C18Rik	320152	4	RIKEN cDNA 4930412C18 gene	ncRNA	0	0	N6 L6a Car12	1.67195	0.105329	0	0	C5 L5a Batf3	0.4282	0.0960998	0.299874
4930412E21Rik	100039548	3	RIKEN cDNA 4930412E21 gene	ncRNA	0	0	N9 L5b Cdh13	0	0.0248461	0	0	C4 L5a Hsd11b1	0.17985	0.0326083	0
4930412L05Rik	73941	4	RIKEN cDNA 4930412L05 gene	ncRNA	0	0	N9 L5b Cdh13	0.717647	0.0394043	0	0	C3 L4 Arf5	0.341667	0.0708727	0.389583
4930412O13Rik	381347	2	RIKEN cDNA 4930412O13 gene	ncRNA	0	0	N9 L5b Cdh13	0	0	0	0	C11 L6a Sla	0	0	NA
4930413E15Rik	74627	5	RIKEN cDNA 4930413E15 gene	ncRNA	0	0	N9 L5b Cdh13	0	0	0	0	C11 L6a Sla	0	0	NA
4930413F20Rik	71637	15	RIKEN cDNA 4930413F20 gene	ncRNA	0	0	N2 Sst Cbln4	11.2341	0.160756	1	0	C1 Pvalb Wt1	1.77219	0.276318	0.677205
4930413G21Rik	73951	7	RIKEN cDNA 4930413G21 gene	ncRNA	0	0	N7 L6a Mgp	3.20105	0.155136	2	7	C6 L6a Car12	1.91077	0.336525	0.302301
4930413M19Rik	73889	14	RIKEN cDNA 4930413M19 gene	ncRNA	0	0	N9 L5b Cdh13	0	0	0	0	C11 L6a Sla	0	0	NA
4930414F18Rik	78790	16	RIKEN cDNA 4930414F18 gene	ncRNA	0	0	N10 L5b Tph2	0.927813	0.0999169	0	0	C4 L5a Hsd11b1	0.0385714	0.111556	0
4930414L22Rik	78108	6	promoter of Mat2a antisense radiation induced circulating long non-coding RNA	ncRNA	2	8	N8 L5 Chrna6	28.5618	0.25964	2	9	C11 L6a Sla	18.9222	0.322089	0.328086
4930414N06Rik	73894	19	RIKEN cDNA 4930414N06 gene	ncRNA	0	0	N7 L6a Mgp	9.15368	0.17323	0	0	C11 L6a Sla	2.48043	0.128684	0.710044
4930415F15Rik	73862	11	spermatogenesis associated 48	protein-coding	0	0	N1 Pvalb Wt1	1.28829	0.0946085	0	0	C3 L4 Arf5	0.468222	0.0933414	0.285962
4930415O20Rik	73863	15	RIKEN cDNA 4930415O20 gene	protein-coding	0	0	N1 Pvalb Wt1	5.38429	0.0653411	0	0	C4 L5a Hsd11b1	0.720827	0.109027	0.381634
4930417H01Rik	414106	2	RIKEN cDNA 4930417H01 gene	ncRNA	0	0	N3 L4 Arf5	1.64747	0.0799394	0	0	C4 L5a Hsd11b1	1.00474	0.130114	0.318919
4930417O13Rik	73870	6	RIKEN cDNA 4930417O13 gene	ncRNA	0	0	N9 L5b Cdh13	0	0	0	0	C8 L5 Chrna6	0.0544444	0.0376912	0
4930417O22Rik	73887	11	RIKEN cDNA 4930417O22 gene	ncRNA	0	0	N9 L5b Cdh13	0	0	0	0	C11 L6a Sla	0	0.0111111	NA
4930419G24Rik	73874	3	RIKEN cDNA 4930419G24 gene	ncRNA	1	9	N4 L5a Hsd11b1	40.1258	0.38225	1	9	C4 L5a Hsd11b1	15.3068	0.460934	0.943666
4930421P05Rik	73771	2	RIKEN cDNA 4930421P05 gene	protein-coding	0	0	N3 L4 Arf5	3.74329	0.0452674	0	0	C4 L5a Hsd11b1	0.466692	0.11304	0.651673
4930421P07Rik	195712	5	RIKEN cDNA 4930421P07 gene	unknown	0	0	N9 L5b Cdh13	0	0	0	0	C11 L6a Sla	0	0	NA
4930423D24Rik	73892	10	RIKEN cDNA 4930423D24 gene	ncRNA	0	0	N9 L5b Cdh13	0	0	0	0	C11 L6a Sla	0	0	NA
4930423M02Rik	73872	4	RIKEN cDNA 4930423M02 gene	ncRNA	0	0	N9 L5b Cdh13	0	0	0	0	C3 L4 Arf5	0.186667	0.0111111	0
4930425K10Rik	73865	5	RIKEN cDNA 4930425K10 gene	ncRNA	0	0	N5 L5a Batf3	0.441111	0.020202	0	0	C4 L5a Hsd11b1	0.0497744	0.0223723	0
4930425L21Rik	75024	6	RIKEN cDNA 4930425L21 gene	ncRNA	0	0	N6 L6a Car12	0.169024	0.0368519	0	0	C8 L5 Chrna6	1.72556	0.136089	0
4930425O10Rik	74635	3	RIKEN cDNA 4930425O10 gene	ncRNA	0	0	N9 L5b Cdh13	0	0	0	0	C11 L6a Sla	0	0.0165812	NA
4930426D05Rik	74644	18	RIKEN cDNA 4930426D05 gene	protein-coding	0	0	N2 Sst Cbln4	8.12409	0.138532	0	0	C2 Sst Cbln4	2.18043	0.248904	0.651085
4930426I24Rik	100504512	12	RIKEN cDNA 4930426I24 gene	unknown	0	0	N2 Sst Cbln4	3.74727	0.182003	0	0	C1 Pvalb Wt1	0.763437	0.232871	0.528244
4930426L09Rik	74629	2	RIKEN cDNA 4930426L09 gene	ncRNA	0	0	N9 L5b Cdh13	1.14529	0.0289524	0	0	C5 L5a Batf3	0.3176	0.0478215	0.080047
4930427A07Rik	104732	12	tubulin epsilon and delta complex 1	protein-coding	0	0	N8 L5 Chrna6	8.46818	0.06322	0	0	C8 L5 Chrna6	0.834444	0.0636915	0.497311
4930428D20Rik	78110	16	RIKEN cDNA 4930428D20 gene	ncRNA	0	0	N9 L5b Cdh13	0	0	0	0	C11 L6a Sla	0	0	NA
4930428E07Rik	73867	12	RIKEN cDNA 4930428E07 gene	ncRNA	0	1	N4 L5a Hsd11b1	0.0764407	0.2975	0	1	C8 L5 Chrna6	0.202222	0.313832	0.190672
4930428G15Rik	73856	9	RIKEN cDNA 4930428G15 gene	ncRNA	0	0	N5 L5a Batf3	0.140202	0.010101	0	0	C5 L5a Batf3	1.0726	0.104576	0.0162679
4930428N03Rik	73871	14	RIKEN cDNA 4930428N03 gene	ncRNA	0	0	N9 L5b Cdh13	0	0	0	0	C11 L6a Sla	0	0	NA
4930428O21Rik	654809	5	RIKEN cDNA 4930428O21 gene	ncRNA	0	0	N9 L5b Cdh13	0	0	0	0	C11 L6a Sla	0	0	NA
4930429B21Rik	67576	3	RIKEN cDNA 4930429B21 gene	ncRNA	0	0	N9 L5b Cdh13	14.4753	0.133746	0	6	C4 L5a Hsd11b1	9.36504	0.444322	0.168432
4930429D17Rik	74624	5	RIKEN cDNA 4930429D17 gene	ncRNA	0	0	N9 L5b Cdh13	0	0	0	0	C11 L6a Sla	0	0.0351348	NA
4930429F11Rik	74622	17	RIKEN cDNA 4930429F11 gene	ncRNA	0	0	N9 L5b Cdh13	0	0	0	0	C11 L6a Sla	0	0	NA
4930429F24Rik	74633	9	RIKEN cDNA 4930429F24 gene	ncRNA	0	0	N2 Sst Cbln4	4.50591	0.0306432	0	0	C6 L6a Car12	0.740769	0.239534	0.137086
4930429P21Rik	73855	9	RIKEN cDNA 4930429P21 gene	ncRNA	0	0	N11 L6a Sla	1.04125	0.0625688	0	0	C8 L5 Chrna6	0.702222	0.288931	0.263562
4930430A15Rik	67575	2	RIKEN cDNA 4930430A15 gene	protein-coding	0	0	N3 L4 Arf5	0.0437975	0.0515023	0	0	C9 L5b Cdh13	0.02	0.0647143	0.060271
4930430E12Rik	71639	4	RIKEN cDNA 4930430E12 gene	unknown	0	0	N9 L5b Cdh13	0	0	0	0	C1 Pvalb Wt1	0.432188	0.03125	0
4930430F08Rik	68281	10	RIKEN cDNA 4930430F08 gene	protein-coding	0	3	N2 Sst Cbln4	21.9745	0.174351	2	9	C2 Sst Cbln4	10.9443	0.241048	0.43462
4930430F21Rik	73784	15	RIKEN cDNA 4930430F21 gene	ncRNA	0	0	N10 L5b Tph2	1.16156	0.0423182	0	0	C2 Sst Cbln4	1.14087	0.0941555	0.0527277
4930430J02Rik	73772	9	RIKEN cDNA 4930430J02 gene	ncRNA	0	0	N3 L4 Arf5	0.399494	0.0892407	0	0	C4 L5a Hsd11b1	0.825564	0.114506	0
4930431F10Rik	71638	10	RIKEN cDNA 4930431F10 gene	ncRNA	0	0	N3 L4 Arf5	0.0179747	0	0	0	C4 L5a Hsd11b1	0.014812	0	0
4930431F12Rik	75783	5	RIKEN cDNA 4930431F12 gene	ncRNA	0	0	N2 Sst Cbln4	0.0277273	0.0454545	0	0	C4 L5a Hsd11b1	0.00556391	0.0075188	0.397802
4930431P03Rik	73895	14	RIKEN cDNA 4930431P03 gene	ncRNA	0	0	N9 L5b Cdh13	0	0	0	0	C11 L6a Sla	0	0	NA
4930431P22Rik	73883	14	RIKEN cDNA 4930431P22 gene	protein-coding	0	0	N9 L5b Cdh13	0	0	0	0	C5 L5a Batf3	0.08	0.0762875	0
4930432E11Rik	243900	7	RIKEN cDNA 4930432E11 gene	unknown	0	0	N9 L5b Cdh13	0	0.0258407	0	0	C11 L6a Sla	0	0.0522984	NA
4930432J09Rik	73877	14	RIKEN cDNA 4930432J09 gene	ncRNA	0	0	N9 L5b Cdh13	0	0.0258407	0	0	C11 L6a Sla	0	0.0434783	NA
4930432K21Rik	74666	8	RIKEN cDNA 4930432K21 gene	protein-coding	0	0	N6 L6a Car12	7.6822	0.172597	0	0	C2 Sst Cbln4	1.94739	0.155798	0.424262
4930432L08Rik	74621	5	RIKEN cDNA 4930432L08 gene	unknown	0	0	N11 L6a Sla	3.26344	0.0240135	0	0	C11 L6a Sla	0	0	0
4930432M17Rik	619318	3	RIKEN cDNA 4930432M17 gene	protein-coding	0	0	N9 L5b Cdh13	0	0	0	0	C11 L6a Sla	0	0	NA
4930432O09Rik	74647	10	RIKEN cDNA 4930432O09 gene	ncRNA	0	0	N9 L5b Cdh13	0	0	0	0	C11 L6a Sla	0	0	NA
4930433B08Rik	73959	3	RIKEN cDNA 4930433B08 gene	ncRNA	0	0	N9 L5b Cdh13	0	0	0	0	C11 L6a Sla	0	0	NA
4930433I11Rik	243944	7	RIKEN cDNA 4930433I11 gene	protein-coding	0	0	N9 L5b Cdh13	0	0	0	0	C11 L6a Sla	0	0	NA
4930433N12Rik	114673	9	RIKEN cDNA 4930433N12 gene	ncRNA	0	0	N9 L5b Cdh13	0	0	0	0	C11 L6a Sla	0	0	NA
4930434B07Rik	73973	1	RIKEN cDNA 4930434B07 gene	ncRNA	0	0	N9 L5b Cdh13	0	0	0	0	C11 L6a Sla	0	0	NA
4930434J06Rik	74667	14	RIKEN cDNA 4930434J06 gene	ncRNA	0	0	N4 L5a Hsd11b1	0.316271	0.0284908	0	0	C4 L5a Hsd11b1	0.0153383	0.0802182	1
4930435E12Rik	74663	16	RIKEN cDNA 4930435E12 gene	protein-coding	0	0	N9 L5b Cdh13	0	0	0	0	C11 L6a Sla	0	0	NA
4930435F18Rik	74680	13	RIKEN cDNA 4930435F18 gene	ncRNA	0	0	N6 L6a Car12	0.0390244	0	0	0	C2 Sst Cbln4	0.0169565	0.0150376	0.407231
4930437M23Rik	73976	5	RIKEN cDNA 4930437M23 gene	ncRNA	0	0	N9 L5b Cdh13	0	0	0	0	C11 L6a Sla	0	0	NA
4930438A08Rik	73988	11	RIKEN cDNA 4930438A08 gene	protein-coding	0	0	N9 L5b Cdh13	0	0	0	0	C4 L5a Hsd11b1	0.139549	0.0075188	0
4930438E09Rik	73977	14	RIKEN cDNA 4930438E09 gene	ncRNA	0	0	N9 L5b Cdh13	0	0	0	0	C11 L6a Sla	0	0.0259252	NA
4930439A04Rik	78119	1	RIKEN cDNA 4930439A04 gene	ncRNA	0	0	N4 L5a Hsd11b1	3.83678	0.178239	0	0	C3 L4 Arf5	0.855444	0.213297	0.617047
4930440C22Rik	74689	1	RIKEN cDNA 4930440C22 gene	ncRNA	0	0	N9 L5b Cdh13	0	0	0	0	C11 L6a Sla	0	0	NA
4930440I19Rik	78158	2	RIKEN cDNA 4930440I19 gene	ncRNA	0	0	N9 L5b Cdh13	0	0.0253165	0	0	C6 L6a Car12	1.29885	0.0379857	0
4930441J16Rik	73962	2	RIKEN cDNA 4930441J16 gene	ncRNA	0	0	N9 L5b Cdh13	0	0.010101	0	0	C11 L6a Sla	0.163043	0.0380155	0
4930442E04Rik	75800	19	RIKEN cDNA 4930442E04 gene	ncRNA	0	0	N1 Pvalb Wt1	1.732	0.0655409	0	0	C1 Pvalb Wt1	0.265313	0.100391	0.714355
4930442J19Rik	74660	2	RIKEN cDNA 4930442J19 gene	ncRNA	0	0	N9 L5b Cdh13	0	0	0	0	C11 L6a Sla	0	0	NA
4930442L01Rik	67583	3	RIKEN cDNA 4930442L01 gene	ncRNA	0	0	N9 L5b Cdh13	0	0	0	0	C11 L6a Sla	0	0	NA
4930443O20Rik	74687	2	RIKEN cDNA 4930443O20 gene	ncRNA	0	0	N3 L4 Arf5	1.47924	0.0674462	0	0	C3 L4 Arf5	0.561556	0.113378	0.72825
4930444A19Rik	73980	1	RIKEN cDNA 4930444A19 gene	unknown	0	0	N2 Sst Cbln4	2.18091	0.233739	1	0	C2 Sst Cbln4	0.546087	0.363642	0.862628
4930444F02Rik	73968	10	RIKEN cDNA 4930444F02 gene	ncRNA	0	0	N6 L6a Car12	1.13902	0.124375	0	0	C3 L4 Arf5	0.684111	0.193918	0.185657
4930444G20Rik	114671	10	RIKEN cDNA 4930444G20 gene	protein-coding	0	0	N9 L5b Cdh13	0	0	0	0	C11 L6a Sla	0	0	NA
4930444M15Rik	75789	14	RIKEN cDNA 4930444M15 gene	ncRNA	0	0	N8 L5 Chrna6	4.24636	0.0656558	0	0	C2 Sst Cbln4	0.281304	0.0346027	0.540516
4930444P10Rik	75799	1	RIKEN cDNA 4930444P10 gene	protein-coding	0	0	N9 L5b Cdh13	1.99088	0.108545	0	0	C6 L6a Car12	0.621538	0.115959	0.4113
4930445E18Rik	78115	15	RIKEN cDNA 4930445E18 gene	unknown	0	0	N4 L5a Hsd11b1	0.112542	0.0851879	0	0	C6 L6a Car12	0.138077	0.0432804	0.161624
4930445N18Rik	73985	18	RIKEN cDNA 4930445N18 gene	ncRNA	0	0	N3 L4 Arf5	0.537089	0.0200878	0	0	C11 L6a Sla	0	0	0
4930447A16Rik	74892	15	RIKEN cDNA 4930447A16 gene	protein-coding	0	0	N6 L6a Car12	5.15366	0.215889	0	1	C11 L6a Sla	2.83043	0.3003	0.508937
4930447C04Rik	75801	12	RIKEN cDNA 4930447C04 gene	protein-coding	0	3	N11 L6a Sla	40.7762	0.250006	0	3	C4 L5a Hsd11b1	8.65173	0.173306	0.804192
4930447F24Rik	76873	9	RIKEN cDNA 4930447F24 gene	ncRNA	0	1	N3 L4 Arf5	9.85582	0.234352	0	3	C3 L4 Arf5	4.53133	0.265396	0.696599
4930447J18Rik	73961	14	RIKEN cDNA 4930447J18 gene	ncRNA	0	0	N9 L5b Cdh13	0	0	0	0	C11 L6a Sla	0	0.0318818	NA
4930447K03Rik	432745	13	RIKEN cDNA 4930447K03 gene	ncRNA	0	0	N7 L6a Mgp	0.101053	0.0228247	0	0	C2 Sst Cbln4	0.196087	0.0728194	0.0609661
4930447M23Rik	108871	2	RIKEN cDNA 4930447M23 gene	ncRNA	0	0	N3 L4 Arf5	22.2608	0.183421	0	7	C3 L4 Arf5	21.1211	0.452113	0.240186
4930447N08Rik	71647	3	RIKEN cDNA 4930447N08 gene	ncRNA	0	0	N2 Sst Cbln4	0.597273	0.0376711	0	1	C8 L5 Chrna6	3.12444	0.367531	0.0681041
4930448C13Rik	73972	12	RIKEN cDNA 4930448C13 gene	ncRNA	0	0	N9 L5b Cdh13	0	0.0271376	0	0	C11 L6a Sla	0	0.0271358	NA
4930448F12Rik	73992	13	RIKEN cDNA 4930448F12 gene	ncRNA	0	0	N4 L5a Hsd11b1	0.127458	0.0258407	0	0	C11 L6a Sla	0	0	0
4930448H16Rik	74872	5	RIKEN cDNA 4930448H16 gene	ncRNA	0	0	N9 L5b Cdh13	0	0.0474387	0	0	C3 L4 Arf5	1.61989	0.064211	0
4930448I06Rik	74897	1	RIKEN cDNA 4930448I06 gene	ncRNA	0	0	N9 L5b Cdh13	0	0	0	0	C11 L6a Sla	0	0	NA
4930448I18Rik	73965	5	RIKEN cDNA 4930448I18 gene	ncRNA	0	0	N6 L6a Car12	1.80902	0.0243902	0	0	C11 L6a Sla	0	0	0
4930448K20Rik	74662	4	glyceraldehyde-3-phosphate dehydrogenase pseudogene	pseudo	0	0	N9 L5b Cdh13	0	0	0	0	C1 Pvalb Wt1	0.01	0	0
4930449C09Rik	73994	15	RIKEN cDNA 4930449C09 gene	ncRNA	0	0	N9 L5b Cdh13	0	0	0	0	C11 L6a Sla	0	0	NA
4930449E01Rik	74864	14	RIKEN cDNA 4930449E01 gene	ncRNA	0	0	N7 L6a Mgp	3.71684	0.0360221	0	0	C5 L5a Batf3	1.3948	0.0680819	0.137627
4930449E18Rik	78120	19	RIKEN cDNA 4930449E18 gene	ncRNA	0	0	N1 Pvalb Wt1	4.09429	0.0699558	0	0	C3 L4 Arf5	0.827889	0.0703375	0.336113
4930449I24Rik	67410	5	RIKEN cDNA 4930449I24 gene	protein-coding	0	0	N9 L5b Cdh13	0	0	0	0	C11 L6a Sla	0	0	NA
4930451E10Rik	78111	13	RIKEN cDNA 4930451E10 gene	unknown	0	0	N10 L5b Tph2	2.03781	0.0361329	0	0	C8 L5 Chrna6	1.25333	0.0949706	0.017786
4930451G09Rik	74684	16	RIKEN cDNA 4930451G09 gene	protein-coding	0	0	N10 L5b Tph2	4.1075	0.0879527	0	0	C6 L6a Car12	1.33269	0.182469	0.24468
4930451I11Rik	78118	7	RIKEN cDNA 4930451I11 gene	protein-coding	0	0	N4 L5a Hsd11b1	1.35339	0.0244193	0	0	C4 L5a Hsd11b1	4.44383	0.141445	0.107134
4930452A19Rik	71092	17	RIKEN cDNA 4930452A19 gene	ncRNA	0	0	N9 L5b Cdh13	0	0	0	0	C11 L6a Sla	0	0.0327844	NA
4930452B06Rik	74430	14	RIKEN cDNA 4930452B06 gene	protein-coding	2	0	N2 Sst Cbln4	19.9427	0.29585	2	5	C2 Sst Cbln4	30.0409	0.423924	0.146047
4930452G13Rik	73989	14	RIKEN cDNA 4930452G13 gene	ncRNA	0	0	N9 L5b Cdh13	0	0	0	0	C10 L5b Tph2	0.415926	0.037037	0
4930452N14Rik	78112	1	RIKEN cDNA 4930452N14 gene	ncRNA	0	0	N6 L6a Car12	0.277073	0.018774	0	0	C3 L4 Arf5	0.637778	0.036035	0.0488126
4930453L07Rik	74688	8	RIKEN cDNA 4930453L07 gene	ncRNA	0	0	N9 L5b Cdh13	0	0	0	0	C11 L6a Sla	0	0	NA
4930453N24Rik	67609	16	RIKEN cDNA 4930453N24 gene	protein-coding	0	0	N10 L5b Tph2	8.71969	0.173019	2	9	C11 L6a Sla	9.26043	0.207361	0.223058
4930453O03Rik	74885	1	RIKEN cDNA 4930453O03 gene	unknown	0	0	N9 L5b Cdh13	0	0	0	0	C11 L6a Sla	0	0	NA
4930455B14Rik	74859	14	RIKEN cDNA 4930455B14 gene	ncRNA	0	0	N9 L5b Cdh13	0	0	0	0	C4 L5a Hsd11b1	0.0184211	0.0150376	0
4930455C13Rik	73990	10	RIKEN cDNA 4930455C13 gene	ncRNA	0	0	N1 Pvalb Wt1	9.11171	0.137586	2	7	C10 L5b Tph2	7.69481	0.486182	0.189653
4930455D15Rik	75795	18	RIKEN cDNA 4930455D15 gene	ncRNA	0	0	N5 L5a Batf3	0.245354	0.0620269	0	0	C7 L6a Mgp	0.128095	0.0826794	0.339841
4930455F16Rik	76397	16	RIKEN cDNA 4930455F16 gene	ncRNA	0	0	N4 L5a Hsd11b1	1.60017	0.0316005	0	0	C10 L5b Tph2	0.111111	0.0424454	0
4930455G09Rik	78917	4	RIKEN cDNA 4930455G09 gene	ncRNA	0	0	N5 L5a Batf3	0.54	0.0242092	0	0	C1 Pvalb Wt1	0.983437	0.0539987	0
4930455H04Rik	74654	3	RIKEN cDNA 4930455H04 gene	ncRNA	0	0	N9 L5b Cdh13	2.42118	0.122706	0	1	C6 L6a Car12	1.92077	0.317631	0.365689
4930455J16Rik	67585	13	RIKEN cDNA 4930455J16 gene	ncRNA	0	0	N9 L5b Cdh13	0	0	0	0	C11 L6a Sla	0	0	NA
4930456L15Rik	71650	4	RIKEN cDNA 4930456L15 gene	ncRNA	0	0	N7 L6a Mgp	1.11737	0.0526316	0	0	C11 L6a Sla	0	0	0
4930458A03Rik	330146	5	RIKEN cDNA 4930458A03 gene	unknown	0	0	N9 L5b Cdh13	0	0	0	0	C11 L6a Sla	0	0.02	NA
4930459C07Rik	74881	10	RIKEN cDNA 4930459C07 gene	ncRNA	0	0	N9 L5b Cdh13	0	0	0	0	C11 L6a Sla	0	0	NA
4930459I23Rik	74690	3	RIKEN cDNA 4930459I23 gene	ncRNA	0	0	N9 L5b Cdh13	0	0	0	0	C11 L6a Sla	0	0	NA
4930459L07Rik	78163	5	RIKEN cDNA 4930459L07 gene	ncRNA	0	0	N9 L5b Cdh13	0	0	0	0	C11 L6a Sla	0	0	NA
4930461C15Rik	74883	16	RIKEN cDNA 4930461C15 gene	ncRNA	0	0	N4 L5a Hsd11b1	2.84492	0.0277913	0	0	C11 L6a Sla	1.30391	0.0452769	0.222918
4930461G14Rik	74879	9	RIKEN cDNA 4930461G14 gene	ncRNA	0	0	N4 L5a Hsd11b1	0.915424	0.0210669	0	0	C1 Pvalb Wt1	0.295938	0.0264881	0
4930463O16Rik	75804	10	RIKEN cDNA 4930463O16 gene	ncRNA	0	0	N9 L5b Cdh13	0	0	0	0	C2 Sst Cbln4	0.0130435	0.0075188	0
4930465K10Rik	67640	18	RIKEN cDNA 4930465K10 gene	ncRNA	0	0	N7 L6a Mgp	4.26947	0.0384076	0	0	C6 L6a Car12	1.01846	0.0806873	0.158092
4930465M20Rik	74968	12	RIKEN cDNA 4930465M20 gene	ncRNA	0	0	N9 L5b Cdh13	0	0	0	0	C11 L6a Sla	0	0	NA
4930467D21Rik	75814	5	RIKEN cDNA 4930467D21 gene	ncRNA	0	0	N3 L4 Arf5	0.104304	0.178032	0	0	C3 L4 Arf5	0.144111	0.22287	0.187622
4930467E23Rik	626415	8	RIKEN cDNA 4930467E23 gene	protein-coding	0	0	N6 L6a Car12	0.31	0.0710549	0	0	C4 L5a Hsd11b1	0.0286466	0.044169	0.0675558
4930467J12Rik	74909	13	RIKEN cDNA 4930467J12 gene	unknown	0	0	N9 L5b Cdh13	0	0.0243902	0	0	C11 L6a Sla	0	0	NA
4930467K11Rik	74928	10	RIKEN cDNA 4930467K11 gene	ncRNA	0	0	N11 L6a Sla	3.41688	0.022226	0	0	C3 L4 Arf5	1.03267	0.0377887	0.141869
4930469G21Rik	100502590	1	testis expressed 50	protein-coding	0	2	N8 L5 Chrna6	20.51	0.257074	0	0	C3 L4 Arf5	4.151	0.149878	0.71043
4930469K13Rik	76874	11	RIKEN cDNA 4930469K13 gene	ncRNA	0	0	N9 L5b Cdh13	0	0.0255623	0	0	C11 L6a Sla	0	0	NA
4930470H14Rik	75815	17	RIKEN cDNA 4930470H14 gene	ncRNA	0	0	N6 L6a Car12	0.38439	0.0454427	0	0	C4 L5a Hsd11b1	0.226316	0.0695419	0.0168302
4930470O06Rik	75017	8	RIKEN cDNA 4930470O06 gene	ncRNA	0	0	N1 Pvalb Wt1	0.533714	0.238498	0	0	C4 L5a Hsd11b1	0.174361	0.212588	0.303562
4930470P17Rik	67637	2	RIKEN cDNA 4930470P17 gene	ncRNA	0	0	N9 L5b Cdh13	0	0	0	0	C6 L6a Car12	0.149615	0.100865	0
4930471C04Rik	78176	14	RIKEN cDNA 4930471C04 gene	ncRNA	0	0	N1 Pvalb Wt1	1.61171	0.0550675	0	0	C4 L5a Hsd11b1	1.50338	0.0624687	0.138713
4930471G03Rik	74966	18	RIKEN cDNA 4930471G03 gene	ncRNA	0	0	N2 Sst Cbln4	0.971364	0.0412195	0	0	C4 L5a Hsd11b1	0.0687218	0.0514324	0
4930471G24Rik	74939	13	RIKEN cDNA 4930471G24 gene	ncRNA	0	0	N9 L5b Cdh13	0	0	0	0	C1 Pvalb Wt1	0.20875	0.03125	0
4930471L23Rik	75022	17	RIKEN cDNA 4930471L23 gene	ncRNA	0	0	N9 L5b Cdh13	0	0.0765997	0	0	C11 L6a Sla	0	0.206762	NA
4930471M09Rik	75787	6	RIKEN cDNA 4930471M09 gene	ncRNA	0	0	N3 L4 Arf5	0.899114	0.0255623	0	0	C3 L4 Arf5	0.550889	0.0414196	0.345132
4930473A02Rik	321014	2	RIKEN cDNA 4930473A02 gene	ncRNA	2	7	N8 L5 Chrna6	32.3073	0.230627	2	9	C11 L6a Sla	17.3857	0.0950989	0.341407
4930473H19Rik	74926	12	RIKEN cDNA 4930473H19 gene	ncRNA	0	0	N9 L5b Cdh13	1.21676	0.17169	2	5	C1 Pvalb Wt1	0.581875	0.479056	0.253629
4930473O22Rik	75025	10	RIKEN cDNA 4930473O22 gene	ncRNA	0	0	N9 L5b Cdh13	0	0	0	0	C11 L6a Sla	0	0	NA
4930474G06Rik	320624	18	RIKEN cDNA 4930474G06 gene	ncRNA	0	0	N9 L5b Cdh13	0.0282353	0.0617414	0	0	C11 L6a Sla	0	0.0714927	0
4930474H20Rik	74967	14	RIKEN cDNA 4930474H20 gene	ncRNA	0	0	N9 L5b Cdh13	0	0.0523494	0	0	C11 L6a Sla	0	0.104461	NA
4930474M22Rik	74917	17	RIKEN cDNA 4930474M22 gene	ncRNA	0	0	N3 L4 Arf5	1.01241	0.0597732	0	0	C3 L4 Arf5	0.721333	0.121427	0.72394
4930474N05Rik	218921	14	RIKEN cDNA 4930474N05 gene	protein-coding	0	0	N9 L5b Cdh13	0	0	0	0	C11 L6a Sla	0	0	NA
4930474N09Rik	67639	12	RIKEN cDNA 4930474N09 gene	ncRNA	0	0	N5 L5a Batf3	1.50929	0.0114127	0	0	C4 L5a Hsd11b1	0.167594	0.0075188	0
4930477N07Rik	74905	10	RIKEN cDNA 4930477N07 gene	ncRNA	0	0	N9 L5b Cdh13	0	0	0	0	C2 Sst Cbln4	0.0413043	0.0676007	0
4930478L05Rik	75818	16	RIKEN cDNA 4930478L05 gene	ncRNA	0	0	N3 L4 Arf5	5.52684	0.135913	0	0	C3 L4 Arf5	2.942	0.102527	0.929344
4930478P22Rik	74429	5	RIKEN cDNA 4930478P22 gene	ncRNA	0	0	N9 L5b Cdh13	0	0	0	0	C11 L6a Sla	0	0	NA
4930479D17Rik	74925	6	RIKEN cDNA 4930479D17 gene	ncRNA	0	0	N5 L5a Batf3	3.58091	0.0660646	0	0	C11 L6a Sla	4.43609	0.208632	0.101113
4930479H17Rik	78171	7	RIKEN cDNA 4930479H17 gene	ncRNA	0	0	N10 L5b Tph2	0.608125	0.03125	0	0	C11 L6a Sla	0	0	0
4930480G23Rik	74988	4	RIKEN cDNA 4930480G23 gene	ncRNA	0	0	N9 L5b Cdh13	0	0	0	0	C11 L6a Sla	0	0.0434783	NA
4930480K15Rik	78800	17	RIKEN cDNA 4930480K15 gene	ncRNA	0	6	N4 L5a Hsd11b1	35.9263	0.250961	0	8	C3 L4 Arf5	21.8856	0.435616	0.800396
4930480K23Rik	75016	14	RIKEN cDNA 4930480K23 gene	ncRNA	0	0	N7 L6a Mgp	3.17474	0.173217	0	0	C6 L6a Car12	1.70808	0.147365	0.515104
4930480M12Rik	74930	12	RIKEN cDNA 4930480M12 gene	ncRNA	0	0	N9 L5b Cdh13	0	0.0489659	0	0	C11 L6a Sla	0	0.0689655	NA
4930481A15Rik	74931	19	RIKEN cDNA 4930481A15 gene	ncRNA	0	0	N7 L6a Mgp	2.35421	0.0543766	2	4	C8 L5 Chrna6	4.45222	0.394182	0.136077
4930482G09Rik	75001	3	RIKEN cDNA 4930482G09 gene	ncRNA	0	0	N6 L6a Car12	2.62683	0.028214	0	0	C3 L4 Arf5	0.572556	0.0352074	0.317044
4930483J18Rik	67638	15	RIKEN cDNA 4930483J18 gene	ncRNA	0	0	N6 L6a Car12	8.15049	0.0210669	0	0	C1 Pvalb Wt1	0.517813	0.0444516	0
4930483K19Rik	74953	10	RIKEN cDNA 4930483K19 gene	ncRNA	0	0	N5 L5a Batf3	1.25545	0.111368	0	0	C4 L5a Hsd11b1	0.451353	0.0645496	0.434594
4930483O08Rik	74970	7	RIKEN cDNA 4930483O08 gene	ncRNA	0	0	N9 L5b Cdh13	0	0	0	0	C11 L6a Sla	0	0	NA
4930484H19Rik	75813	10	RIKEN cDNA 4930484H19 gene	ncRNA	0	0	N1 Pvalb Wt1	0.129429	0.0206762	0	0	C3 L4 Arf5	0.191778	0.0388505	0
4930486F22Rik	78170	10	RIKEN cDNA 4930486F22 gene	ncRNA	0	0	N6 L6a Car12	2.00537	0.111394	0	0	C4 L5a Hsd11b1	0.139774	0.0830616	0.222561
4930486I03Rik	75028	1	RIKEN cDNA 4930486I03 gene	ncRNA	0	0	N9 L5b Cdh13	0	0	0	0	C11 L6a Sla	0	0	NA
4930486L24Rik	214639	13	RIKEN cDNA 4930486L24 gene	protein-coding	0	0	N9 L5b Cdh13	0	0.010101	0	0	C11 L6a Sla	0	0	NA
4930487D11Rik	78172	5	RIKEN cDNA 4930487D11 gene	ncRNA	0	0	N9 L5b Cdh13	0	0	0	0	C11 L6a Sla	0	0.037037	NA
4930487H11Rik	74992	1	RIKEN cDNA 4930487H11 gene	ncRNA	0	0	N3 L4 Arf5	0.675823	0.0126582	0	0	C5 L5a Batf3	0.0736	0.04	0
4930488B22Rik	74971	1	RIKEN cDNA 4930488B22 gene	ncRNA	0	0	N9 L5b Cdh13	0	0	0	0	C11 L6a Sla	0	0	NA
4930488L21Rik	75809	8	RIKEN cDNA 4930488L21 gene	ncRNA	0	0	N4 L5a Hsd11b1	0.937458	0.0606876	0	0	C2 Sst Cbln4	1.55391	0.0959761	0.177844
4930488N24Rik	75011	17	RIKEN cDNA 4930488N24 gene	protein-coding	0	0	N9 L5b Cdh13	0	0	0	0	C11 L6a Sla	0	0	NA
4930500A05Rik	74972	17	RIKEN cDNA 4930500A05 gene	ncRNA	1	3	N4 L5a Hsd11b1	0.734407	0.25397	2	6	C3 L4 Arf5	0.718	0.333157	0.4809
4930500F04Rik	70969	5	RIKEN cDNA 4930500F04 gene	ncRNA	0	0	N9 L5b Cdh13	0	0	0	0	C11 L6a Sla	0.14087	0.0380155	0
4930500H12Rik	74991	16	RIKEN cDNA 4930500H12 gene	ncRNA	0	0	N7 L6a Mgp	0.268421	0.0627085	0	0	C6 L6a Car12	0.0896154	0.0541136	0
4930500J02Rik	74959	2	pluripotency associated transcript 14	ncRNA	0	0	N8 L5 Chrna6	11.2227	0.104198	0	0	C8 L5 Chrna6	2.29778	0.0994133	0.849721
4930500L23Rik	74973	5	RIKEN cDNA 4930500L23 gene	ncRNA	0	0	N9 L5b Cdh13	0	0.0258407	0	0	C11 L6a Sla	0	0.0630589	NA
4930502A04Rik	74951	9	RIKEN cDNA 4930502A04 gene	ncRNA	0	0	N9 L5b Cdh13	0	0	0	0	C11 L6a Sla	0	0.009534	NA
4930502C15Rik	320733	6	RIKEN cDNA 4930502C15 gene	ncRNA	0	0	N6 L6a Car12	1.10366	0.106869	0	0	C4 L5a Hsd11b1	0.452632	0.116414	0.743277
4930502E09Rik	74995	11	RIKEN cDNA 4930502E09 gene	ncRNA	0	0	N6 L6a Car12	0.950488	0.0476426	0	0	C6 L6a Car12	0.681923	0.0340003	0.12782
4930502M04Rik	74974	3	RIKEN cDNA 4930502M04 gene	unknown	0	0	N9 L5b Cdh13	0	0	0	0	C11 L6a Sla	0	0	NA
4930503B20Rik	75015	3	RIKEN cDNA 4930503B20 gene	protein-coding	0	0	N1 Pvalb Wt1	0.838	0.100973	0	0	C9 L5b Cdh13	0.352759	0.207315	0.28645
4930503E14Rik	74954	14	RIKEN cDNA 4930503E14 gene	protein-coding	0	0	N9 L5b Cdh13	0	0	0	0	C11 L6a Sla	0	0	NA
4930503E24Rik	75030	10	eukaryotic translation initiation factor 3, subunit I pseudogene	pseudo	0	0	N9 L5b Cdh13	0.0855882	0.0511878	0	0	C8 L5 Chrna6	0.207778	0.0705737	0.033101
4930503F20Rik	218902	14	RIKEN cDNA 4930503F20 gene	ncRNA	0	0	N9 L5b Cdh13	0	0	0	0	C11 L6a Sla	0	0	NA
4930503L19Rik	269033	18	RIKEN cDNA 4930503L19 gene	protein-coding	1	1	N8 L5 Chrna6	27.4618	0.189753	2	6	C7 L6a Mgp	9.24095	0.295326	0.686033
4930503O07Rik	74942	1	RIKEN cDNA 4930503O07 gene	ncRNA	0	0	N9 L5b Cdh13	0	0	0	0	C11 L6a Sla	0	0	NA
4930504C09Rik	75076	15	RIKEN cDNA 4930504C09 gene	ncRNA	0	0	N5 L5a Batf3	0.0841414	0.0387841	0	0	C6 L6a Car12	0.0396154	0.0316819	0
4930504O13Rik	403200	11	RIKEN cDNA 4930504O13 gene	protein-coding	0	0	N9 L5b Cdh13	0	0	0	0	C11 L6a Sla	0	0	NA
4930505A04Rik	75087	11	RIKEN cDNA 4930505A04 gene	protein-coding	0	0	N11 L6a Sla	1.61094	0.0644579	0	0	C7 L6a Mgp	1.59381	0.124846	0.255479
4930505G20Rik	75088	14	RIKEN cDNA 4930505G20 gene	ncRNA	0	0	N3 L4 Arf5	0.32038	0.0253165	0	0	C11 L6a Sla	0	0	0
4930505K13Rik	75073	7	RIKEN cDNA 4930505K13 gene	ncRNA	0	0	N9 L5b Cdh13	2.26324	0.0367191	0	0	C4 L5a Hsd11b1	0.155564	0.0618116	0
4930505K14Rik	78015	5	RIKEN cDNA 4930505K14 gene	ncRNA	0	0	N9 L5b Cdh13	0	0.0974095	0	0	C11 L6a Sla	0	0.0823031	NA
4930505N22Rik	100174921	19	RIKEN cDNA 4930505N22 gene	unknown	0	0	N4 L5a Hsd11b1	18.6549	0.0986081	0	1	C10 L5b Tph2	2.36148	0.234667	0.720518
4930505O20Rik	74709	8	RIKEN cDNA 4930505O20 gene	ncRNA	0	0	N9 L5b Cdh13	0	0	0	0	C11 L6a Sla	0	0	NA
4930506A18Rik	75044	8	RIKEN cDNA 4930506A18 gene	ncRNA	0	4	N4 L5a Hsd11b1	4.86356	0.261572	0	7	C8 L5 Chrna6	0.793333	0.328707	0.294072
4930506C21Rik	75060	17	RIKEN cDNA 4930506C21 gene	ncRNA	2	8	N2 Sst Cbln4	42.3514	0.177211	2	9	C1 Pvalb Wt1	52.1975	0.242328	0.18279
4930506M07Rik	71653	19	shootin 1	protein-coding	2	9	N4 L5a Hsd11b1	32.8476	0.124634	2	9	C11 L6a Sla	11.6857	0.108753	0.723932
4930507D05Rik	74706	10	RIKEN cDNA 4930507D05 gene	ncRNA	0	0	N11 L6a Sla	12.3616	0.12946	1	1	C11 L6a Sla	3.39565	0.26217	0.394238
4930507D10Rik	75043	11	RIKEN cDNA 4930507D10 gene	ncRNA	0	0	N4 L5a Hsd11b1	0.804407	0.0169492	0	0	C11 L6a Sla	0	0.0344828	0
4930509E16Rik	75115	9	RIKEN cDNA 4930509E16 gene	ncRNA	0	0	N9 L5b Cdh13	0	0.0294118	0	0	C2 Sst Cbln4	0.0382609	0.034028	0
4930509J09Rik	74693	3	RIKEN cDNA 4930509J09 gene	ncRNA	1	4	N8 L5 Chrna6	5.63364	0.588099	1	4	C8 L5 Chrna6	1.26778	0.59816	0.775508
4930509K18Rik	75819	4	RIKEN cDNA 4930509K18 gene	ncRNA	0	0	N9 L5b Cdh13	0	0	0	0	C10 L5b Tph2	0.0688889	0.037037	0
4930511A02Rik	74712	12	RIKEN cDNA 4930511A02 gene	ncRNA	0	0	N9 L5b Cdh13	0	0	0	0	C11 L6a Sla	0	0.0165812	NA
4930511A08Rik	78178	6	RIKEN cDNA 4930511A08 gene	ncRNA	1	5	N9 L5b Cdh13	4.57294	0.338352	1	8	C3 L4 Arf5	1.15111	0.331614	0.730206
4930511E03Rik	78773	6	RIKEN cDNA 4930511E03 gene	ncRNA	0	0	N9 L5b Cdh13	0	0	0	0	C11 L6a Sla	0	0	NA
4930511M06Rik	75084	18	RIKEN cDNA 4930511M06 gene	ncRNA	0	0	N9 L5b Cdh13	0	0	0	0	C7 L6a Mgp	0.181429	0.103624	0
4930512B01Rik	74724	12	RIKEN cDNA 4930512B01 gene	ncRNA	2	6	N7 L6a Mgp	6.81526	0.204641	1	8	C3 L4 Arf5	3.17433	0.262664	0.841861
4930512H18Rik	75111	8	RIKEN cDNA 4930512H18 gene	unknown	0	0	N9 L5b Cdh13	0	0	0	0	C11 L6a Sla	0	0	NA
4930512J16Rik	75131	6	RIKEN cDNA 4930512J16 gene	ncRNA	0	0	N1 Pvalb Wt1	0.532286	0.0285714	0	0	C11 L6a Sla	0	0.03125	0
4930513D17Rik	75095	5	RIKEN cDNA 4930513D17 gene	ncRNA	0	0	N3 L4 Arf5	0.0694937	0.0432995	0	0	C10 L5b Tph2	0.779259	0.0850368	0.0202959
4930513L16Rik	78021	15	RIKEN cDNA 4930513L16 gene	unknown	0	0	N3 L4 Arf5	2.87316	0.0485618	0	0	C4 L5a Hsd11b1	0.907594	0.0592382	0.569918
4930513N10Rik	319960	8	RIKEN cDNA 4930513N10 gene	ncRNA	0	0	N4 L5a Hsd11b1	0.872203	0.127939	0	0	C10 L5b Tph2	1.1263	0.174566	0.172654
4930515B02Rik	75128	4	RIKEN cDNA 4930515B02 gene	ncRNA	0	0	N9 L5b Cdh13	0	0	0	0	C11 L6a Sla	0	0	NA
4930515G01Rik	67642	5	RIKEN cDNA 4930515G01 gene	ncRNA	0	0	N5 L5a Batf3	2.3999	0.0338853	0	0	C6 L6a Car12	1.35731	0.0813038	0.0246152
4930515G16Rik	75070	6	myc induced nuclear antigen pseudogene	pseudo	0	0	N9 L5b Cdh13	0	0	0	0	C11 L6a Sla	0	0	NA
4930515L03Rik	75069	2	RIKEN cDNA 4930515L03 gene	ncRNA	0	0	N4 L5a Hsd11b1	0.357627	0.0540824	0	0	C3 L4 Arf5	0.127889	0.0774824	0.326549
4930517E11Rik	74702	2	RIKEN cDNA 4930517E11 gene	ncRNA	0	0	N2 Sst Cbln4	7.74591	0.0818502	0	0	C3 L4 Arf5	2.89844	0.08529	0.476186
4930517G24Rik	67644	8	RIKEN cDNA 4930517G24 gene	ncRNA	0	0	N9 L5b Cdh13	0	0.0388501	0	0	C4 L5a Hsd11b1	0.0504511	0.0357153	0
4930517M08Rik	75117	17	RIKEN cDNA 4930517M08 gene	ncRNA	0	0	N9 L5b Cdh13	0	0	0	0	C11 L6a Sla	0	0	NA
4930517O19Rik	75075	14	RIKEN cDNA 4930517O19 gene	unknown	1	1	N8 L5 Chrna6	4.38273	0.189655	2	3	C3 L4 Arf5	1.70978	0.374723	0.605802
4930518F22Rik	71655	8	RIKEN cDNA 4930518F22 gene	unknown	0	0	N11 L6a Sla	2.55375	0.167187	2	7	C1 Pvalb Wt1	2.85156	0.614155	0.176288
4930518J21Rik	75123	8	RIKEN cDNA 4930518J21 gene	ncRNA	0	0	N9 L5b Cdh13	0	0	0	0	C11 L6a Sla	0	0	NA
4930518P08Rik	71654	13	RIKEN cDNA 4930518P08 gene	ncRNA	0	0	N9 L5b Cdh13	0	0	0	0	C11 L6a Sla	0	0	NA
4930519D14Rik	75090	13	RIKEN cDNA 4930519D14 gene	ncRNA	0	0	N9 L5b Cdh13	0	0.0200878	0	0	C11 L6a Sla	0	0	NA
4930519F09Rik	114676	10	pyruvate dehydrogenase E1 alpha 1 pseudogene	pseudo	0	0	N2 Sst Cbln4	0.0227273	0	0	0	C5 L5a Batf3	0.1636	0.04	0.0513778
4930519F24Rik	108970	9	RIKEN cDNA 4930519F24 gene	ncRNA	0	0	N3 L4 Arf5	0.557595	0.0126582	0	0	C9 L5b Cdh13	0.0793103	0.0344828	0
4930519G04Rik	67593	5	RIKEN cDNA 4930519G04 gene	protein-coding	0	0	N11 L6a Sla	0.056875	0.0327033	0	0	C5 L5a Batf3	0.0144	0.0351269	0.234973
4930519H02Rik	75058	5	RIKEN cDNA 4930519H02 gene	ncRNA	0	0	N3 L4 Arf5	0.0126582	0	0	0	C9 L5b Cdh13	0.0389655	0.0560478	0
4930520O04Rik	75116	9	RIKEN cDNA 4930520O04 gene	ncRNA	0	0	N2 Sst Cbln4	9.12818	0.12129	0	0	C2 Sst Cbln4	3.15696	0.328669	0.391074
4930520P13Rik	75086	13	RIKEN cDNA 4930520P13 gene	ncRNA	0	0	N9 L5b Cdh13	0	0	0	0	C11 L6a Sla	0	0	NA
4930521E06Rik	75066	1	RIKEN cDNA 4930521E06 gene	ncRNA	0	0	N2 Sst Cbln4	4.43682	0.0454545	0	0	C11 L6a Sla	0	0	0
4930521O11Rik	74715	14	RIKEN cDNA 4930521O11 gene	protein-coding	0	0	N2 Sst Cbln4	0.0177273	0	0	0	C1 Pvalb Wt1	0.0059375	0.0075188	0.339757
4930521O17Rik	75067	10	RIKEN cDNA 4930521O17 gene	ncRNA	0	0	N9 L5b Cdh13	0	0.0126582	0	0	C11 L6a Sla	0	0	NA
4930522H14Rik	67646	4	RIKEN cDNA 4930522H14 gene	protein-coding	0	0	N9 L5b Cdh13	0	0.0243902	0	0	C5 L5a Batf3	0.0372	0.02	0
4930522L14Rik	100041734	5	RIKEN cDNA 4930522L14 gene	protein-coding	0	0	N2 Sst Cbln4	2.85636	0.14551	1	2	C11 L6a Sla	0.717826	0.245146	0.396874
4930522O17Rik	78180	4	RIKEN cDNA 4930522O17 gene	ncRNA	0	0	N9 L5b Cdh13	0	0	0	0	C11 L6a Sla	0	0	NA
4930522P08Rik	78183	8	RIKEN cDNA 4930522P08 gene	unknown	0	0	N6 L6a Car12	5.97	0.0868386	0	0	C7 L6a Mgp	1.73952	0.135166	0.588307
4930523C07Rik	67647	1	RIKEN cDNA 4930523C07 gene	protein-coding	0	0	N11 L6a Sla	0.188125	0.03125	0	0	C11 L6a Sla	0	0	0
4930523O13Rik	74726	15	RIKEN cDNA 4930523O13 gene	ncRNA	0	0	N9 L5b Cdh13	0	0	0	0	C11 L6a Sla	0	0.0287451	NA
4930524B15Rik	67592	11	RIKEN cDNA 4930524B15 gene	protein-coding	0	0	N4 L5a Hsd11b1	1.87932	0.0210996	0	0	C3 L4 Arf5	0.557667	0.0146335	0.183849
4930524B17Rik	74725	6	RIKEN cDNA 4930524B17 gene	ncRNA	0	0	N9 L5b Cdh13	0	0.0126582	0	0	C11 L6a Sla	0	0	NA
4930524C18Rik	75822	14	RIKEN cDNA 4930524C18 gene	ncRNA	0	0	N9 L5b Cdh13	0	0	0	0	C11 L6a Sla	0	0.02	NA
4930524O05Rik	75096	19	RIKEN cDNA 4930524O05 gene	ncRNA	0	0	N9 L5b Cdh13	0	0	0	0	C10 L5b Tph2	0.0462963	0	0
4930524O08Rik	74700	9	RIKEN cDNA 4930524O08 gene	ncRNA	0	0	N9 L5b Cdh13	0	0	0	0	C3 L4 Arf5	0.398444	0.0295791	0
4930525C09Rik	78127	10	RIKEN cDNA 4930525C09 gene	ncRNA	0	0	N2 Sst Cbln4	0.391364	0.157314	0	0	C11 L6a Sla	0	0.299396	0
4930525D18Rik	75100	9	RIKEN cDNA 4930525D18 gene	ncRNA	0	0	N9 L5b Cdh13	0	0.0234226	0	0	C2 Sst Cbln4	0.37	0.0552338	0
4930525G20Rik	320163	13	RIKEN cDNA 4930525G20 gene	ncRNA	0	0	N6 L6a Car12	12.6966	0.112175	2	3	C6 L6a Car12	1.92385	0.259146	0.473462
4930526A20Rik	622485	17	tRNA splicing endonuclease 34 pseudogene	pseudo	0	0	N9 L5b Cdh13	1.665	0.0244193	0	0	C11 L6a Sla	0.361739	0.075962	0.233333
4930526F13Rik	75193	13	RIKEN cDNA 4930526F13 gene	ncRNA	0	0	N9 L5b Cdh13	0	0	0	0	C2 Sst Cbln4	0.0165217	0.0869565	0
4930526H09Rik	102636142	13	RIKEN cDNA 4930526H09 gene	ncRNA	0	0	N9 L5b Cdh13	0	0	0	0	C11 L6a Sla	0	0	NA
4930526I15Rik	75135	9	RIKEN cDNA 4930526I15 gene	ncRNA	0	1	N1 Pvalb Wt1	6.48	0.334843	2	4	C1 Pvalb Wt1	4.96781	0.276383	0.282511
4930526L06Rik	75138	19	RIKEN cDNA 4930526L06 gene	ncRNA	0	0	N9 L5b Cdh13	0	0.0553833	0	0	C11 L6a Sla	0	0.067129	NA
4930527F14Rik	67651	14	RIKEN cDNA 4930527F14 gene	ncRNA	0	0	N4 L5a Hsd11b1	0.212712	0.0416915	0	0	C5 L5a Batf3	0.108	0.0645238	0.133639
4930527G23Rik	78199	18	RIKEN cDNA 4930527G23 gene	ncRNA	0	0	N9 L5b Cdh13	0	0	0	0	C11 L6a Sla	0	0.0380155	NA
4930528A17Rik	67735	4	RIKEN cDNA 4930528A17 gene	ncRNA	2	9	N6 L6a Car12	12.2085	0.0791913	2	9	C3 L4 Arf5	6.41111	0.0427336	0.723826
4930528D03Rik	75223	13	RIKEN cDNA 4930528D03 gene	ncRNA	0	0	N10 L5b Tph2	2.02969	0.0269111	0	0	C9 L5b Cdh13	0.127931	0.0321767	0
4930528G23Rik	75831	6	RIKEN cDNA 4930528G23 gene	ncRNA	0	0	N4 L5a Hsd11b1	0.700339	0.0654906	0	0	C3 L4 Arf5	0.396556	0.0456527	0.234153
4930528H21Rik	78034	6	RIKEN cDNA 4930528H21 gene	ncRNA	0	0	N9 L5b Cdh13	0	0	0	0	C11 L6a Sla	0	0.0075188	NA
4930528P14Rik	78193	2	RIKEN cDNA 4930528P14 gene	ncRNA	0	0	N9 L5b Cdh13	0	0	0	0	C11 L6a Sla	0	0	NA
4930529C04Rik	619677	3	zinc finger, BED domain containing 4 pseudogene	pseudo	0	0	N4 L5a Hsd11b1	0.0184746	0	0	0	C8 L5 Chrna6	0.02	0	0.199646
4930529K09Rik	75155	14	RIKEN cDNA 4930529K09 gene	ncRNA	0	0	N9 L5b Cdh13	0	0	0	0	C11 L6a Sla	0	0	NA
4930529L06Rik	78023	16	RIKEN cDNA 4930529L06 gene	ncRNA	0	0	N9 L5b Cdh13	0	0	0	0	C11 L6a Sla	0	0	NA
4930529N20Rik	75197	13	RIKEN cDNA 4930529N20 gene	ncRNA	0	0	N9 L5b Cdh13	0	0	0	0	C11 L6a Sla	0	0	NA
4930532I03Rik	75833	10	RIKEN cDNA 4930532I03 gene	ncRNA	2	4	N1 Pvalb Wt1	3.76429	0.323678	2	6	C3 L4 Arf5	2.27467	0.388784	0.845706
4930532M18Rik	75233	1	RIKEN cDNA 4930532M18 gene	ncRNA	0	0	N9 L5b Cdh13	0	0.0243902	0	0	C4 L5a Hsd11b1	0.238346	0.0658203	0
4930533B01Rik	75166	2	RIKEN cDNA 4930533B01 gene	ncRNA	0	0	N4 L5a Hsd11b1	0.779153	0.146122	0	0	C8 L5 Chrna6	0.24	0.198237	0.486498
4930533I22Rik	434018	6	RIKEN cDNA 4930533I22 gene	ncRNA	0	0	N4 L5a Hsd11b1	12.6008	0.18537	2	9	C4 L5a Hsd11b1	29.8122	0.119339	0.200761
4930533K18Rik	75189	10	RIKEN cDNA 4930533K18 gene	unknown	0	0	N6 L6a Car12	2.82585	0.0731707	0	0	C11 L6a Sla	0	0.0816311	0
4930533N22Rik	75205	7	RIKEN cDNA 4930533N22 gene	ncRNA	0	0	N3 L4 Arf5	0.130506	0.0353972	0	0	C9 L5b Cdh13	0.0127586	0.051565	0.368341
4930533P14Rik	75159	1	RIKEN cDNA 4930533P14 gene	ncRNA	0	0	N9 L5b Cdh13	0	0.038498	0	0	C11 L6a Sla	0	0.0380155	NA
4930535L15Rik	78027	9	RIKEN cDNA 4930535L15 gene	ncRNA	0	0	N4 L5a Hsd11b1	0.438305	0.0252102	0	0	C3 L4 Arf5	1.07289	0.060096	0.167039
4930535O05Rik	75237	8	RIKEN cDNA 4930535O05 gene	ncRNA	0	0	N9 L5b Cdh13	0	0	0	0	C11 L6a Sla	0	0	NA
4930538E20Rik	78200	11	RIKEN cDNA 4930538E20 gene	unknown	0	5	N4 L5a Hsd11b1	18.6793	0.235138	2	9	C11 L6a Sla	15.17	0.17677	0.267159
4930538K18Rik	75180	4	transmembrane protein 269	protein-coding	0	0	N6 L6a Car12	3.2739	0.0946702	0	2	C6 L6a Car12	2.34423	0.252832	0.197071
4930538L07Rik	78029	14	RIKEN cDNA 4930538L07 gene	ncRNA	0	0	N9 L5b Cdh13	0	0	0	0	C11 L6a Sla	0	0	NA
4930539C22Rik	75208	3	RIKEN cDNA 4930539C22 gene	ncRNA	0	0	N3 L4 Arf5	0.16481	0.0126582	0	0	C11 L6a Sla	0	0.0276983	0
4930539E08Rik	207819	17	RIKEN cDNA 4930539E08 gene	protein-coding	0	0	N4 L5a Hsd11b1	0.530339	0.144181	0	0	C6 L6a Car12	1.64269	0.238043	0.065457
4930539J05Rik	319587	3	RIKEN cDNA 4930539J05 gene	ncRNA	0	0	N5 L5a Batf3	1.35212	0.0510594	1	3	C9 L5b Cdh13	3.5969	0.34846	0.0802757
4930539M17Rik	75149	3	RIKEN cDNA 4930539M17 gene	ncRNA	0	0	N9 L5b Cdh13	0	0.0454545	0	0	C6 L6a Car12	0.158846	0.0384615	0
4930539N22Rik	75203	3	RIKEN cDNA 4930539N22 gene	ncRNA	1	8	N10 L5b Tph2	16.4103	0.622555	1	8	C3 L4 Arf5	11.4021	0.661263	0.730493
4930540M03Rik	78025	9	RIKEN cDNA 4930540M03 gene	ncRNA	0	0	N9 L5b Cdh13	0	0	0	0	C11 L6a Sla	0	0	NA
4930542C21Rik	75175	16	RIKEN cDNA 4930542C21 gene	ncRNA	0	0	N9 L5b Cdh13	0	0.0335901	0	0	C11 L6a Sla	0	0.0785479	NA
4930542D17Rik	75211	16	RIKEN cDNA 4930542D17 gene	ncRNA	0	0	N1 Pvalb Wt1	3.54229	0.0285714	0	0	C11 L6a Sla	0	0	0
4930542M03Rik	75154	17	RIKEN cDNA 4930542M03 gene	ncRNA	0	0	N9 L5b Cdh13	0	0	0	0	C11 L6a Sla	0	0	NA
4930542N06Rik	75827	5	RIKEN cDNA 4930542N06 gene	ncRNA	0	0	N10 L5b Tph2	0.543438	0.0255623	0	0	C8 L5 Chrna6	0.53	0.0753413	0.0667837
4930543D07Rik	75176	18	RIKEN cDNA 4930543D07 gene	ncRNA	0	0	N4 L5a Hsd11b1	0.197458	0.0735604	0	0	C3 L4 Arf5	0.158889	0.0689506	0.22042
4930543E12Rik	75239	7	RIKEN cDNA 4930543E12 gene	ncRNA	0	0	N9 L5b Cdh13	0	0	0	0	C11 L6a Sla	0	0.0359754	NA
4930543I03Rik	75160	15	RIKEN cDNA 4930543I03 gene	ncRNA	0	0	N9 L5b Cdh13	0	0	0	0	C11 L6a Sla	0	0.0075188	NA
4930543N07Rik	75187	7	RIKEN cDNA 4930543N07 gene	ncRNA	0	0	N9 L5b Cdh13	0	0	0	0	C11 L6a Sla	0	0	NA
4930544D05Rik	668433	11	RIKEN cDNA 4930544D05 gene	protein-coding	0	0	N9 L5b Cdh13	0	0	0	0	C11 L6a Sla	0	0	NA
4930544G11Rik	67653	6	RIKEN cDNA 4930544G11 gene	protein-coding	0	0	N9 L5b Cdh13	0	0	0	0	C11 L6a Sla	0	0	NA
4930544M13Rik	75161	13	RIKEN cDNA 4930544M13 gene	ncRNA	0	0	N9 L5b Cdh13	0	0.0423336	0	0	C11 L6a Sla	0	0.0158043	NA
4930545E07Rik	75162	18	RIKEN cDNA 4930545E07 gene	ncRNA	0	0	N9 L5b Cdh13	0	0	0	0	C11 L6a Sla	0	0	NA
4930545H06Rik	75148	10	RIKEN cDNA 4930545H06 gene	ncRNA	0	0	N1 Pvalb Wt1	1.54486	0.0285714	0	0	C9 L5b Cdh13	0.334828	0.032517	0
4930545L08Rik	78028	9	RIKEN cDNA 4930545L08 gene	ncRNA	0	0	N10 L5b Tph2	2.88063	0.03125	0	0	C11 L6a Sla	0	0	0
4930545L23Rik	78805	2	RIKEN cDNA 4930545L23 gene	ncRNA	0	3	N9 L5b Cdh13	2.67941	0.213997	0	6	C3 L4 Arf5	2.69267	0.263403	0.516589
4930546C10Rik	78931	18	RIKEN cDNA 4930546C10 gene	ncRNA	0	0	N9 L5b Cdh13	0	0	0	0	C2 Sst Cbln4	0.0330435	0.0398133	0
4930546K05Rik	78194	9	RIKEN cDNA 4930546K05 gene	ncRNA	0	0	N3 L4 Arf5	0.714051	0.0787122	0	0	C9 L5b Cdh13	0.496897	0.129124	0.225414
4930547E08Rik	78031	2	RIKEN cDNA 4930547E08 gene	ncRNA	0	0	N8 L5 Chrna6	5.59909	0.0554007	0	0	C6 L6a Car12	0.4	0.102595	0
4930547E14Rik	75145	16	RIKEN cDNA 4930547E14 gene	ncRNA	1	4	N10 L5b Tph2	6.37094	0.411321	2	7	C4 L5a Hsd11b1	1.72917	0.698389	0.506745
4930547H16Rik	75278	13	RIKEN cDNA 4930547H16 gene	ncRNA	0	0	N9 L5b Cdh13	0	0	0	0	C11 L6a Sla	0	0	NA
4930548G14Rik	75281	15	RIKEN cDNA 4930548G14 gene	ncRNA	0	0	N9 L5b Cdh13	0	0	0	0	C11 L6a Sla	0	0	NA
4930548H24Rik	67656	5	RIKEN cDNA 4930548H24 gene	protein-coding	0	0	N9 L5b Cdh13	0	0	0	0	C2 Sst Cbln4	0.829565	0.0826465	0
4930548J01Rik	78043	17	RIKEN cDNA 4930548J01 gene	ncRNA	0	0	N9 L5b Cdh13	0	0.0169492	0	0	C11 L6a Sla	0	0	NA
4930548K13Rik	75360	4	RIKEN cDNA 4930548K13 gene	ncRNA	0	0	N9 L5b Cdh13	0	0.0360476	0	0	C5 L5a Batf3	0.074	0.0325873	0
4930549C01Rik	67663	4	testis expressed 46	protein-coding	0	0	N9 L5b Cdh13	0	0.03125	0	0	C4 L5a Hsd11b1	0.0893233	0.0302949	0
4930549C15Rik	75243	12	RIKEN cDNA 4930549C15 gene	ncRNA	0	0	N4 L5a Hsd11b1	7.34373	0.181323	0	1	C4 L5a Hsd11b1	2.57947	0.303629	0.969142
4930549G23Rik	75286	18	RIKEN cDNA 4930549G23 gene	ncRNA	0	0	N10 L5b Tph2	7.38063	0.12281	2	7	C11 L6a Sla	17.1652	0.494206	0.149484
4930550C14Rik	75311	9	RIKEN cDNA 4930550C14 gene	protein-coding	0	0	N8 L5 Chrna6	4.69909	0.216822	0	0	C3 L4 Arf5	2.36856	0.152024	0.599904
4930550C17Rik	75245	13	RIKEN cDNA 4930550C17 gene	ncRNA	0	0	N9 L5b Cdh13	0	0	0	0	C11 L6a Sla	0	0	NA
4930552N02Rik	75367	4	RIKEN cDNA 4930552N02 gene	ncRNA	0	0	N9 L5b Cdh13	0	0	0	0	C11 L6a Sla	0	0	NA
4930552P12Rik	77594	19	RIKEN cDNA 4930552P12 gene	ncRNA	0	0	N11 L6a Sla	7.50906	0.0407117	0	0	C8 L5 Chrna6	0.572222	0.0789291	0.312174
4930553C11Rik	75315	11	RIKEN cDNA 4930553C11 gene	ncRNA	0	0	N10 L5b Tph2	0.093125	0.0264296	0	0	C10 L5b Tph2	0.0585185	0.0306125	0.170834
4930553E22Rik	75247	16	RIKEN cDNA 4930553E22 gene	ncRNA	0	0	N9 L5b Cdh13	0	0	0	0	C11 L6a Sla	0	0	NA
4930553J12Rik	75351	16	RIKEN cDNA 4930553J12 gene	ncRNA	0	0	N9 L5b Cdh13	0	0	0	0	C11 L6a Sla	0	0	NA
4930553P18Rik	75355	6	RIKEN cDNA 4930553P18 gene	ncRNA	0	0	N1 Pvalb Wt1	7.68086	0.0703637	0	0	C1 Pvalb Wt1	3.99063	0.139661	0.191614
4930554C24Rik	75253	9	RIKEN cDNA 4930554C24 gene	ncRNA	0	0	N9 L5b Cdh13	0	0	0	0	C2 Sst Cbln4	0.135217	0.0434783	0
4930554G24Rik	75280	11	RIKEN cDNA 4930554G24 gene	ncRNA	0	0	N9 L5b Cdh13	0	0	0	0	C11 L6a Sla	0	0.0740741	NA
4930554H23Rik	77631	7	RIKEN cDNA 4930554H23 gene	ncRNA	0	0	N3 L4 Arf5	0.152405	0.0689754	0	0	C3 L4 Arf5	0.0187778	0.0315285	1
4930554I06Rik	75354	19	RIKEN cDNA 4930554I06 gene	ncRNA	0	0	N9 L5b Cdh13	0	0	0	0	C11 L6a Sla	0	0	NA
4930555A03Rik	100504653	3	RIKEN cDNA 4930555A03 gene	unknown	0	0	N9 L5b Cdh13	0	0	0	0	C11 L6a Sla	0	0	NA
4930555B11Rik	75279	2	RIKEN cDNA 4930555B11 gene	ncRNA	0	0	N9 L5b Cdh13	0	0.03953	0	0	C6 L6a Car12	1.37731	0.0470857	0
4930555G01Rik	108978	14	RIKEN cDNA 4930555G01 gene	protein-coding	0	0	N10 L5b Tph2	0.0234375	0	0	0	C11 L6a Sla	0	0	0
4930555G21Rik	75252	13	RIKEN cDNA 4930555G21 gene	ncRNA	0	0	N9 L5b Cdh13	0	0	0	0	C11 L6a Sla	0	0	NA
4930555K05Rik	75361	13	RIKEN cDNA 4930555K05 gene	ncRNA	0	0	N9 L5b Cdh13	0	0	0	0	C11 L6a Sla	0	0	NA
4930555M17Rik	78039	3	RIKEN cDNA 4930555M17 gene	ncRNA	0	0	N9 L5b Cdh13	0	0	0	0	C11 L6a Sla	0	0	NA
4930556C24Rik	75310	16	RIKEN cDNA 4930556C24 gene	ncRNA	0	0	N9 L5b Cdh13	0	0	0	0	C11 L6a Sla	0	0	NA
4930556G01Rik	75332	4	RIKEN cDNA 4930556G01 gene	ncRNA	0	0	N9 L5b Cdh13	0	0.030632	0	0	C4 L5a Hsd11b1	0.0435338	0.0713955	0
4930556J02Rik	75349	14	RIKEN cDNA 4930556J02 gene	ncRNA	0	0	N9 L5b Cdh13	0	0	0	0	C11 L6a Sla	0	0	NA
4930556L07Rik	75283	2	RIKEN cDNA 4930556L07 gene	ncRNA	0	0	N9 L5b Cdh13	0	0	0	0	C11 L6a Sla	0	0	NA
4930556M19Rik	75259	15	RIKEN cDNA 4930556M19 gene	ncRNA	0	0	N7 L6a Mgp	0.0536842	0.0741196	0	0	C11 L6a Sla	0.865217	0.0517937	0.0027066
4930556N09Rik	75301	10	RIKEN cDNA 4930556N09 gene	ncRNA	0	0	N9 L5b Cdh13	0	0	0	0	C11 L6a Sla	0	0.0075188	NA
4930556N13Rik	75285	11	RIKEN cDNA 4930556N13 gene	ncRNA	0	0	N3 L4 Arf5	0.304177	0.0640996	0	0	C3 L4 Arf5	0.139667	0.168051	0.473289
4930557F10Rik	75322	13	RIKEN cDNA 4930557F10 gene	ncRNA	0	0	N9 L5b Cdh13	0	0.044569	0	0	C11 L6a Sla	0	0.0185122	NA
4930557J02Rik	75357	5	RIKEN cDNA 4930557J02 gene	ncRNA	0	0	N10 L5b Tph2	0.674375	0.0936253	0	0	C10 L5b Tph2	0.163333	0.128456	0.266359
4930557K07Rik	78202	6	RIKEN cDNA 4930557K07 gene	ncRNA	1	7	N7 L6a Mgp	6.70263	0.203596	2	9	C11 L6a Sla	1.08217	0.136418	0.648738
4930558C23Rik	67654	3	RIKEN cDNA 4930558C23 gene	ncRNA	0	0	N9 L5b Cdh13	0	0.0169492	0	0	C11 L6a Sla	0	0.009534	NA
4930558F17Rik	75330	5	RIKEN cDNA 4930558F17 gene	ncRNA	0	0	N9 L5b Cdh13	0	0	0	0	C11 L6a Sla	0	0	NA
4930558J18Rik	75323	1	RIKEN cDNA 4930558J18 gene	ncRNA	0	0	N3 L4 Arf5	3.12709	0.0253165	0	0	C11 L6a Sla	0	0.0163927	0
4930558K02Rik	75368	1	RIKEN cDNA 4930558K02 gene	protein-coding	0	0	N2 Sst Cbln4	3.73409	0.159952	2	1	C6 L6a Car12	0.635385	0.230043	0.794025
4930559C10Rik	75295	12	RIKEN cDNA 4930559C10 gene	ncRNA	0	0	N9 L5b Cdh13	0	0	0	0	C11 L6a Sla	0	0	NA
4930562C15Rik	78809	16	RIKEN cDNA 4930562C15 gene	protein-coding	0	0	N6 L6a Car12	0.822439	0.0838194	0	0	C11 L6a Sla	0.381739	0.108533	0.313922
4930562F07Rik	75255	1	RIKEN cDNA 4930562F07 gene	ncRNA	0	0	N9 L5b Cdh13	0	0	0	0	C11 L6a Sla	0	0	NA
4930562F17Rik	75256	1	RIKEN cDNA 4930562F17 gene	unknown	0	0	N9 L5b Cdh13	0.0147059	0.0169492	0	0	C11 L6a Sla	0	0.0292797	0
4930563D23Rik	75328	16	RIKEN cDNA 4930563D23 gene	protein-coding	0	0	N9 L5b Cdh13	0	0	0	0	C11 L6a Sla	0	0	NA
4930563E18Rik	75370	18	RIKEN cDNA 4930563E18 gene	ncRNA	0	0	N10 L5b Tph2	4.145	0.0625	0	0	C7 L6a Mgp	1.54429	0.0357816	0
4930563E22Rik	75304	11	RIKEN cDNA 4930563E22 gene	protein-coding	0	0	N10 L5b Tph2	15.575	0.100186	1	1	C2 Sst Cbln4	7.14565	0.253502	0.547673
4930563F08Rik	75369	5	RIKEN cDNA 4930563F08 gene	ncRNA	0	0	N7 L6a Mgp	29.2195	0.207816	0	0	C3 L4 Arf5	15.8177	0.27973	0.839803
4930563H07Rik	75347	6	RIKEN cDNA 4930563H07 gene	ncRNA	0	0	N9 L5b Cdh13	0	0	0	0	C11 L6a Sla	0	0	NA
4930563I02Rik	67659	14	RIKEN cDNA 4930563I02 gene	unknown	0	0	N10 L5b Tph2	0.294687	0.134892	0	0	C4 L5a Hsd11b1	0.138421	0.136362	0.23913
4930563M20Rik	78213	8	RIKEN cDNA 4930563M20 gene	ncRNA	0	0	N9 L5b Cdh13	0	0.010101	0	0	C11 L6a Sla	0	0	NA
4930564B18Rik	75272	14	glutamate rich 6B	protein-coding	0	0	N9 L5b Cdh13	0	0	0	0	C11 L6a Sla	0	0.0434783	NA
4930564C03Rik	75341	17	RIKEN cDNA 4930564C03 gene	protein-coding	0	0	N9 L5b Cdh13	0	0	0	0	C11 L6a Sla	0	0	NA
4930564D02Rik	75269	3	RIKEN cDNA 4930564D02 gene	protein-coding	0	0	N9 L5b Cdh13	0	0	0	0	C11 L6a Sla	0	0	NA
4930565D16Rik	75309	3	RIKEN cDNA 4930565D16 gene	ncRNA	0	0	N9 L5b Cdh13	0	0.044569	0	0	C11 L6a Sla	0	0.04	NA
4930565N06Rik	68306	16	RIKEN cDNA 4930565N06 gene	ncRNA	0	0	N4 L5a Hsd11b1	1.11288	0.121457	0	0	C3 L4 Arf5	0.741778	0.133198	0.311549
4930567H12Rik	75930	8	RIKEN cDNA 4930567H12 gene	ncRNA	0	0	N9 L5b Cdh13	0	0	0	0	C1 Pvalb Wt1	0.184375	0.03125	0
4930567J20Rik	78221	16	RIKEN cDNA 4930567J20 gene	ncRNA	0	0	N9 L5b Cdh13	0	0	0	0	C11 L6a Sla	0	0	NA
4930567K12Rik	75845	7	RIKEN cDNA 4930567K12 gene	ncRNA	0	2	N4 L5a Hsd11b1	4.62593	0.252026	0	1	C4 L5a Hsd11b1	1.87564	0.214968	0.836811
4930567K20Rik	78056	10	RIKEN cDNA 4930567K20 gene	ncRNA	0	0	N2 Sst Cbln4	4.90955	0.103496	0	0	C6 L6a Car12	0.652692	0.170609	0.632862
4930568A12Rik	75883	1	RIKEN cDNA 4930568A12 gene	unknown	0	0	N10 L5b Tph2	2.34	0.0413216	0	0	C9 L5b Cdh13	0.231724	0.0717308	0.249476
4930568D16Rik	75859	2	RIKEN cDNA 4930568D16 gene	protein-coding	0	0	N9 L5b Cdh13	0	0	0	0	C11 L6a Sla	0	0	NA
4930568E12Rik	78219	9	RIKEN cDNA 4930568E12 gene	ncRNA	0	0	N9 L5b Cdh13	0	0	0	0	C11 L6a Sla	0	0.0075188	NA
4930568G15Rik	75857	1	RIKEN cDNA 4930568G15 gene	ncRNA	0	0	N6 L6a Car12	0.507805	0.018774	0	0	C4 L5a Hsd11b1	0.765263	0.119902	0.209336
4930570E03Rik	78812	16	RIKEN cDNA 4930570E03 gene	ncRNA	2	6	N9 L5b Cdh13	0	0.284868	2	9	C4 L5a Hsd11b1	0.0087218	0.217702	0
4930570G05Rik	78054	5	RIKEN cDNA 4930570G05 gene	ncRNA	0	0	N10 L5b Tph2	4.24344	0.164481	0	0	C10 L5b Tph2	1.01704	0.28722	0.451479
4930570G19Rik	329782	3	RIKEN cDNA 4930570G19 gene	ncRNA	0	1	N3 L4 Arf5	16.7141	0.231616	2	7	C3 L4 Arf5	8.69111	0.253448	0.715823
4930571K23Rik	75861	7	RIKEN cDNA 4930571K23 gene	protein-coding	0	0	N9 L5b Cdh13	0	0	0	0	C11 L6a Sla	0	0	NA
4930571O06Rik	78048	8	RIKEN cDNA 4930571O06 gene	ncRNA	0	0	N5 L5a Batf3	0.069798	0.010101	0	0	C11 L6a Sla	0	0	0
4930572G02Rik	75943	14	RIKEN cDNA 4930572G02 gene	ncRNA	0	0	N7 L6a Mgp	2.15105	0.106646	0	0	C3 L4 Arf5	0.580333	0.155948	0.432702
4930572J10Rik	75884	18	RIKEN cDNA 4930572J10 gene	ncRNA	0	0	N3 L4 Arf5	0.0541772	0.0126582	0	0	C3 L4 Arf5	0.236778	0.0273956	0.118886
4930572K03Rik	75916	5	RIKEN cDNA 4930572K03 gene	ncRNA	0	0	N9 L5b Cdh13	0	0	0	0	C11 L6a Sla	0	0	NA
4930572O03Rik	381715	5	spermatogenesis associated glutamate (E)-rich protein pseudogene	pseudo	0	0	N9 L5b Cdh13	0	0	0	0	C11 L6a Sla	0	0	NA
4930572O13Rik	75862	14	RIKEN cDNA 4930572O13 gene	ncRNA	0	0	N9 L5b Cdh13	0	0	0	0	C3 L4 Arf5	0.0312222	0.0111111	0
4930573C15Rik	75949	5	RIKEN cDNA 4930573C15 gene	ncRNA	0	0	N9 L5b Cdh13	0	0	0	0	C11 L6a Sla	0	0.037037	NA
4930573H18Rik	75888	3	RIKEN cDNA 4930573H18 gene	unknown	0	0	N9 L5b Cdh13	0	0	0	0	C11 L6a Sla	0	0	NA
4930573O16Rik	78049	2	RIKEN cDNA 4930573O16 gene	ncRNA	0	0	N2 Sst Cbln4	1.20182	0.051461	0	0	C1 Pvalb Wt1	0.778125	0.0525872	0.0921695
4930577N17Rik	67746	3	RIKEN cDNA 4930577N17 gene	ncRNA	0	0	N5 L5a Batf3	2.13202	0.0998291	1	0	C7 L6a Mgp	2.30571	0.256339	0.167258
4930578E11Rik	78058	18	RIKEN cDNA 4930578E11 gene	ncRNA	0	0	N8 L5 Chrna6	0.0345455	0.03125	0	0	C11 L6a Sla	0.0243478	0.0903015	0
4930578I06Rik	67750	14	RIKEN cDNA 4930578I06 gene	protein-coding	0	0	N9 L5b Cdh13	0	0	0	0	C9 L5b Cdh13	0.0444828	0.0713482	0
4930578M01Rik	75951	15	RIKEN cDNA 4930578M01 gene	ncRNA	0	0	N3 L4 Arf5	7.66215	0.219298	2	4	C3 L4 Arf5	2.99856	0.208335	0.585135
4930578N18Rik	78215	16	RIKEN cDNA 4930578N18 gene	ncRNA	0	0	N9 L5b Cdh13	0	0	0	0	C5 L5a Batf3	0.1738	0.0163927	0
4930579C12Rik	319213	9	RIKEN cDNA 4930579C12 gene	unknown	0	0	N9 L5b Cdh13	0	0.0350141	0	0	C11 L6a Sla	0	0.0652166	NA
4930579D09Rik	75904	6	RIKEN cDNA 4930579D09 gene	ncRNA	0	0	N9 L5b Cdh13	0	0	0	0	C7 L6a Mgp	0.047619	0	0
4930579F01Rik	67741	3	RIKEN cDNA 4930579F01 gene	protein-coding	0	0	N9 L5b Cdh13	0	0	0	0	C3 L4 Arf5	0.125667	0.0311431	0
4930579G18Rik	75913	14	RIKEN cDNA 4930579G18 gene	ncRNA	0	0	N7 L6a Mgp	8.84895	0.180732	1	2	C3 L4 Arf5	2.18178	0.186735	0.585361
4930579G24Rik	75939	3	RIKEN cDNA 4930579G24 gene	protein-coding	0	0	N8 L5 Chrna6	5.42727	0.0683685	0	1	C11 L6a Sla	4.21609	0.295818	0.193741
4930579H20Rik	75855	10	RIKEN cDNA 4930579H20 gene	ncRNA	0	0	N6 L6a Car12	0.198049	0.0243902	0	0	C5 L5a Batf3	0.0866	0.0316819	0.242179
4930579J19Rik	75854	13	RIKEN cDNA 4930579J19 gene	ncRNA	0	0	N9 L5b Cdh13	0	0	0	0	C11 L6a Sla	0	0	NA
4930579K19Rik	75881	9	RIKEN cDNA 4930579K19 gene	ncRNA	0	0	N6 L6a Car12	9.54366	0.0626087	0	0	C11 L6a Sla	4.95696	0.212653	0.328119
4930579P08Rik	75878	10	RIKEN cDNA 4930579P08 gene	ncRNA	0	0	N9 L5b Cdh13	0	0	0	0	C11 L6a Sla	0	0	NA
4930581F22Rik	78934	9	RIKEN cDNA 4930581F22 gene	ncRNA	0	0	N1 Pvalb Wt1	2.32	0.215414	1	0	C1 Pvalb Wt1	1.01844	0.315796	0.48618
4930583I09Rik	78057	17	RIKEN cDNA 4930583I09 gene	protein-coding	0	0	N10 L5b Tph2	1.16875	0.0413554	0	0	C10 L5b Tph2	0.144074	0.0364326	1
4930583K01Rik	67745	7	RIKEN cDNA 4930583K01 gene	ncRNA	0	0	N9 L5b Cdh13	0	0	0	0	C5 L5a Batf3	0.579	0.0601761	0
4930583P06Rik	75946	2	RIKEN cDNA 4930583P06 gene	ncRNA	0	0	N3 L4 Arf5	0.352658	0.0379854	0	0	C3 L4 Arf5	1.57222	0.0365244	0.0814793
4930584F24Rik	75942	5	RIKEN cDNA 4930584F24 gene	ncRNA	0	0	N9 L5b Cdh13	0	0	0	0	C11 L6a Sla	0	0	NA
4930586N03Rik	75887	13	RIKEN cDNA 4930586N03 gene	ncRNA	0	0	N2 Sst Cbln4	1.95909	0.185575	0	2	C8 L5 Chrna6	1.12444	0.215736	0.216974
4930587E11Rik	75893	6	RIKEN cDNA 4930587E11 gene	ncRNA	1	8	N4 L5a Hsd11b1	9.9278	0.328289	1	7	C3 L4 Arf5	2.18856	0.383144	0.648154
4930588J15Rik	67740	15	RIKEN cDNA 4930588J15 gene	unknown	0	0	N6 L6a Car12	0.337073	0.0528834	0	0	C4 L5a Hsd11b1	0.306316	0.0800736	0.226344
4930588K23Rik	619305	16	RIKEN cDNA 4930588K23 gene	unknown	0	0	N9 L5b Cdh13	0	0	0	0	C3 L4 Arf5	0.33	0.03328	0
4930589L23Rik	75879	3	RIKEN cDNA 4930589L23 gene	unknown	0	0	N4 L5a Hsd11b1	0.283729	0.0169492	0	0	C3 L4 Arf5	0.0156667	0.0222222	0
4930590J08Rik	381798	6	RIKEN cDNA 4930590J08 gene	protein-coding	0	0	N1 Pvalb Wt1	1.96143	0.209327	0	0	C3 L4 Arf5	0.530444	0.207884	0.648996
4930590L14Rik	75852	3	RIKEN cDNA 4930590L14 gene	ncRNA	0	0	N9 L5b Cdh13	0	0	0	0	C11 L6a Sla	0	0	NA
4930590L20Rik	75910	1	RIKEN cDNA 4930590L20 gene	ncRNA	0	4	N7 L6a Mgp	22.7153	0.361271	0	8	C11 L6a Sla	6.6187	0.482108	0.715344
4930591A17Rik	68175	2	RIKEN cDNA 4930591A17 gene	protein-coding	0	0	N9 L5b Cdh13	0	0	0	0	C3 L4 Arf5	0.115	0.0111111	0
4930591E09Rik	75877	10	RIKEN cDNA 4930591E09 gene	ncRNA	0	0	N9 L5b Cdh13	0	0	0	0	C11 L6a Sla	0	0	NA
4930592A05Rik	75880	15	RIKEN cDNA 4930592A05 gene	ncRNA	0	0	N11 L6a Sla	1.16688	0.0476802	0	0	C9 L5b Cdh13	1.20069	0.0601579	0.00305699
4930592I03Rik	75853	18	RIKEN cDNA 4930592I03 gene	ncRNA	0	0	N3 L4 Arf5	1.23873	0.0126582	0	0	C9 L5b Cdh13	0.161034	0.0344828	0
4930593A02Rik	71301	3	RIKEN cDNA 4930593A02 gene	ncRNA	0	0	N7 L6a Mgp	3.90421	0.157487	0	0	C3 L4 Arf5	1.20522	0.200873	0.298059
4930593C16Rik	78060	9	RIKEN cDNA 4930593C16 gene	ncRNA	0	0	N9 L5b Cdh13	0	0	0	0	C9 L5b Cdh13	0.293448	0.0344828	0
4930594C11Rik	77633	1	G1 to S phase transition pseudogene	pseudo	0	0	N3 L4 Arf5	3.34203	0.114137	0	0	C3 L4 Arf5	1.69422	0.155308	0.501236
4930594M22Rik	654799	14	RIKEN cDNA 4930594M22 gene	unknown	0	0	N10 L5b Tph2	1.05438	0.164943	1	0	C2 Sst Cbln4	1.24609	0.334233	0.213581
4930594O21Rik	75947	3	RIKEN cDNA 4930594O21 gene	ncRNA	0	0	N9 L5b Cdh13	0	0.03125	0	0	C11 L6a Sla	0	0.0075188	NA
4930595D18Rik	78062	12	RIKEN cDNA 4930595D18 gene	ncRNA	0	0	N9 L5b Cdh13	0.771176	0.108765	0	0	C3 L4 Arf5	0.239667	0.180667	0.289142
4930595L18Rik	78059	6	RIKEN cDNA 4930595L18 gene	ncRNA	0	0	N3 L4 Arf5	3.34949	0.0253165	0	0	C7 L6a Mgp	0.447143	0.0389891	0.270324
4930596D02Rik	239036	14	RIKEN cDNA 4930596D02 gene	protein-coding	0	0	N9 L5b Cdh13	0	0	0	0	C11 L6a Sla	0	0	NA
4930596I21Rik	78229	1	RIKEN cDNA 4930596I21 gene	ncRNA	0	0	N3 L4 Arf5	6.69911	0.0582932	0	0	C4 L5a Hsd11b1	1.27511	0.0763652	0.963631
4930597A21Rik	75389	11	RIKEN cDNA 4930597A21 gene	ncRNA	0	0	N9 L5b Cdh13	0	0	0	0	C3 L4 Arf5	0.226889	0.0367868	0
4930597G03Rik	75377	14	RIKEN cDNA 4930597G03 gene	ncRNA	0	0	N9 L5b Cdh13	0	0	0	0	C11 L6a Sla	0	0	NA
4930598F16Rik	75381	1	RIKEN cDNA 4930598F16 gene	ncRNA	0	0	N9 L5b Cdh13	0	0.0285714	0	0	C11 L6a Sla	0	0	NA
4930599N23Rik	75379	6	RIKEN cDNA 4930599N23 gene	ncRNA	0	0	N3 L4 Arf5	9.22532	0.137558	2	8	C3 L4 Arf5	11.3239	0.330202	0.353936
4931402G19Rik	70933	2	RIKEN cDNA 4931402G19 gene	ncRNA	0	0	N4 L5a Hsd11b1	2.93746	0.0885978	0	0	C4 L5a Hsd11b1	0.849173	0.124729	0.624656
4931403E22Rik	70942	19	RIKEN cDNA 4931403E22 gene	ncRNA	0	0	N2 Sst Cbln4	3.74818	0.115825	0	0	C3 L4 Arf5	1.62644	0.218374	0.36559
4931403G20Rik	70934	12	RIKEN cDNA 4931403G20 gene	ncRNA	0	0	N9 L5b Cdh13	4.77912	0.211442	1	4	C3 L4 Arf5	1.714	0.320009	0.47734
4931403M11Rik	70955	14	RIKEN cDNA 4931403M11 gene	unknown	0	0	N9 L5b Cdh13	0	0	0	0	C11 L6a Sla	0	0	NA
4931406B18Rik	74054	7	RIKEN cDNA 4931406B18 gene	protein-coding	0	0	N4 L5a Hsd11b1	0.0557627	0.0169492	0	0	C4 L5a Hsd11b1	0.165113	0.0375098	0.0865897
4931406C07Rik	70984	9	RIKEN cDNA 4931406C07 gene	protein-coding	2	9	N2 Sst Cbln4	8.09545	0.132151	2	9	C3 L4 Arf5	3.10711	0.0901837	0.69255
4931406H21Rik	77592	14	RIKEN cDNA 4931406H21 gene	ncRNA	0	0	N7 L6a Mgp	2.21211	0.0424693	0	0	C3 L4 Arf5	0.903	0.0452552	0.800509
4931406P16Rik	233103	7	RIKEN cDNA 4931406P16 gene	protein-coding	2	8	N2 Sst Cbln4	16.0018	0.26633	2	9	C3 L4 Arf5	8.25378	0.111749	0.690349
4931408C20Rik	210940	1	RIKEN cDNA 4931408C20 gene	protein-coding	0	0	N9 L5b Cdh13	0	0	0	0	C11 L6a Sla	0	0	NA
4931408D14Rik	77059	19	RIKEN cDNA 4931408D14 gene	ncRNA	0	0	N1 Pvalb Wt1	1.75486	0.0250314	0	0	C4 L5a Hsd11b1	0.584286	0.0610236	0.191716
4931409K22Rik	231045	5	RIKEN cDNA 4931409K22 gene	protein-coding	0	0	N6 L6a Car12	0.0268293	0.03125	0	0	C2 Sst Cbln4	0.319565	0.0318319	0
4931412M21	328061	12	predicted gene, 38407	ncRNA	0	0	N6 L6a Car12	0.0258537	0.0686091	0	0	C10 L5b Tph2	0.047037	0.173079	0
4931413K12Rik	70987	11	RIKEN cDNA 4931413K12 gene	ncRNA	0	0	N10 L5b Tph2	5.77562	0.192787	1	3	C4 L5a Hsd11b1	1.17226	0.175974	0.265678
4931414P19Rik	74359	14	RIKEN cDNA 4931414P19 gene	protein-coding	0	0	N6 L6a Car12	1.33244	0.176361	0	3	C7 L6a Mgp	1.97095	0.353378	0.123832
4931417E11Rik	66740	6	RIKEN cDNA 4931417E11 gene	protein-coding	0	0	N9 L5b Cdh13	0	0	0	0	C11 L6a Sla	0	0	NA
4931419H13Rik	70970	3	RIKEN cDNA 4931419H13 gene	ncRNA	0	0	N9 L5b Cdh13	0	0.0269681	0	0	C2 Sst Cbln4	0.272609	0.0750889	0
4931420L22Rik	70972	16	RIKEN cDNA 4931420L22 gene	ncRNA	0	0	N9 L5b Cdh13	0	0	0	0	C4 L5a Hsd11b1	0.00947368	0	0
4931422A03Rik	70986	2	RIKEN cDNA 4931422A03 gene	unknown	0	0	N6 L6a Car12	1.30488	0.187148	2	7	C5 L5a Batf3	1.9676	0.582498	0.13082
4931423N10Rik	70981	2	RIKEN cDNA 4931423N10 gene	protein-coding	0	0	N2 Sst Cbln4	2.28364	0.0928903	0	0	C3 L4 Arf5	0.562444	0.174715	0.343812
4931428F04Rik	74356	8	RIKEN cDNA 4931428F04 gene	protein-coding	0	0	N9 L5b Cdh13	11.7388	0.0956465	2	9	C2 Sst Cbln4	9.43739	0.235901	0.252936
4931428L18Rik	70988	1	RIKEN cDNA 4931428L18 gene	ncRNA	0	0	N9 L5b Cdh13	0	0.010101	0	0	C1 Pvalb Wt1	0.200313	0.03125	0
4931429I11Rik	70989	9	junctional cadherin complex regulator	protein-coding	0	0	N9 L5b Cdh13	0	0.0579566	0	0	C4 L5a Hsd11b1	0.00293233	0.0579083	0
4931429L15Rik	74361	9	RIKEN cDNA 4931429L15 gene	protein-coding	0	0	N4 L5a Hsd11b1	0.403051	0.0396424	0	0	C5 L5a Batf3	0.11	0.0326776	0.370108
4931429P17Rik	70971	13	RIKEN cDNA 4931429P17 gene	ncRNA	0	0	N6 L6a Car12	0.0121951	0	0	0	C1 Pvalb Wt1	0.01125	0.0505954	0
4931430N09Rik	74363	6	RIKEN cDNA 4931430N09 gene	ncRNA	0	0	N3 L4 Arf5	6.38089	0.0990749	0	0	C3 L4 Arf5	3.62344	0.134315	0.551306
4931431B13Rik	70973	7	RIKEN cDNA 4931431B13 gene	ncRNA	0	0	N1 Pvalb Wt1	1.38371	0.114286	0	0	C2 Sst Cbln4	0.206957	0.0347905	0
4931431C16Rik	74364	5	RIKEN cDNA 4931431C16 gene	ncRNA	0	0	N9 L5b Cdh13	1.34618	0.0895972	0	0	C11 L6a Sla	1.21913	0.204718	0.263149
4931431F19Rik	70980	7	ubiquilin 5	protein-coding	0	0	N9 L5b Cdh13	0	0	0	0	C4 L5a Hsd11b1	0.00526316	0	0
4931439C15Rik	74367	18	RIKEN cDNA 4931439C15 gene	ncRNA	0	0	N3 L4 Arf5	0.875949	0.0281736	0	0	C4 L5a Hsd11b1	0.818647	0.0405302	0.115834
4931440F15Rik	216622	11	RIKEN cDNA 4931440F15 gene	protein-coding	0	0	N3 L4 Arf5	7.94481	0.127689	0	0	C7 L6a Mgp	3.9919	0.195449	0.547785
4931440J10Rik	71000	14	RIKEN cDNA 4931440J10 gene	ncRNA	0	0	N8 L5 Chrna6	2.52818	0.13403	1	1	C2 Sst Cbln4	0.805652	0.171835	0.560485
4931440P22Rik	71004	3	RIKEN cDNA 4931440P22 gene	ncRNA	0	0	N2 Sst Cbln4	6.20545	0.189122	2	2	C2 Sst Cbln4	1.57043	0.32367	0.527647
4932411E22Rik	382543	11	ankyrin-repeat and fibronectin type III domain containing 1	protein-coding	0	0	N9 L5b Cdh13	0	0.0735158	0	0	C2 Sst Cbln4	0.983043	0.130838	0
4932412D23Rik	75722	16	RIKEN cDNA 4932412D23 gene	ncRNA	0	0	N10 L5b Tph2	2.28719	0.0787657	0	0	C7 L6a Mgp	0.187143	0.104912	0
4932413F04Rik	319215	9	RIKEN cDNA 4932413F04 gene	ncRNA	0	0	N1 Pvalb Wt1	2.30743	0.102081	0	0	C4 L5a Hsd11b1	2.39789	0.165216	0.370614
4932414J04Rik	237694	11	RIKEN cDNA 4932414J04 gene	ncRNA	0	0	N9 L5b Cdh13	0	0	0	0	C11 L6a Sla	0	0	NA
4932414N04Rik	75721	2	RIKEN cDNA 4932414N04 gene	protein-coding	0	0	N9 L5b Cdh13	0	0.110474	0	0	C11 L6a Sla	0	0.0318319	NA
4932415M13Rik	211496	17	RIKEN cDNA 4932415M13 gene	ncRNA	0	0	N9 L5b Cdh13	0	0	0	0	C11 L6a Sla	0	0	NA
4932416H05Rik	654409	2	RIKEN cDNA 4932416H05 gene	ncRNA	0	0	N11 L6a Sla	5.47656	0.0586865	0	2	C11 L6a Sla	5.40217	0.253891	0.197843
4932416K20Rik	442809	8	RIKEN cDNA 4932416K20 gene	ncRNA	0	0	N5 L5a Batf3	0.00353535	0	0	0	C11 L6a Sla	0	0	0
4932418E24Rik	329366	2	coiled-coil domain containing 187	protein-coding	0	0	N4 L5a Hsd11b1	0.382542	0.0258407	0	0	C4 L5a Hsd11b1	0.00210526	0.0357735	1
4932431P20Rik	114675	7	RIKEN cDNA 4932431P20 gene	unknown	0	0	N9 L5b Cdh13	0	0	0	0	C1 Pvalb Wt1	0.00625	0.0347905	0
4932435O22Rik	319819	11	RIKEN cDNA 4932435O22 gene	ncRNA	0	0	N9 L5b Cdh13	0.448529	0.041986	0	0	C7 L6a Mgp	0.452857	0.137784	0.106151
4932438A13Rik	229227	3	RIKEN cDNA 4932438A13 gene	protein-coding	2	9	N11 L6a Sla	34.3825	0.0348367	2	9	C11 L6a Sla	15.2496	0	0.630926
4932438H23Rik	74387	16	RIKEN cDNA 4932438H23 gene	protein-coding	0	0	N5 L5a Batf3	0.341717	0.111192	0	0	C10 L5b Tph2	0.0840741	0.0597007	0.196514
4932441J04Rik	319216	5	RIKEN cDNA 4932441J04 gene	ncRNA	0	0	N6 L6a Car12	7.68	0.127685	0	0	C3 L4 Arf5	1.32856	0.175361	0.0931969
4932443I19Rik	403185	8	RIKEN cDNA 4932443I19 gene	protein-coding	0	0	N6 L6a Car12	0.125366	0.0538805	0	0	C1 Pvalb Wt1	0.0146875	0.0423733	0
4932443L11Rik	78899	8	RIKEN cDNA 4932443L11 gene	unknown	0	0	N8 L5 Chrna6	2.98727	0.192581	0	0	C2 Sst Cbln4	0.45087	0.222144	0.624733
4932702P03Rik	73326	13	RIKEN cDNA 4932702P03 gene	ncRNA	0	0	N11 L6a Sla	4.81438	0.0493548	1	1	C1 Pvalb Wt1	3.72719	0.320498	0.21706
4933400B14Rik	71052	17	RIKEN cDNA 4933400B14 gene	ncRNA	0	0	N9 L5b Cdh13	0	0	0	0	C4 L5a Hsd11b1	0.137744	0.0075188	0
4933400C23Rik	331003	9	RIKEN cDNA 4933400C23 gene	ncRNA	0	0	N9 L5b Cdh13	0	0.0400877	0	0	C5 L5a Batf3	0.0228	0.0730283	0
4933400F21Rik	74403	1	RIKEN cDNA 4933400F21 gene	ncRNA	0	0	N4 L5a Hsd11b1	3.48119	0.0771481	0	0	C7 L6a Mgp	0.69381	0.0770253	0.923069
4933400L20Rik	71058	8	RIKEN cDNA 4933400L20 gene	ncRNA	0	0	N9 L5b Cdh13	0	0.0283284	0	0	C11 L6a Sla	0	0.0633759	NA
4933401D09Rik	71008	17	RIKEN cDNA 4933401D09 gene	ncRNA	0	0	N9 L5b Cdh13	0	0.0526316	0	0	C4 L5a Hsd11b1	0.00473684	0	0
4933401H06Rik	71038	3	RIKEN cDNA 4933401H06 gene	ncRNA	0	0	N4 L5a Hsd11b1	0.17	0.0169492	0	0	C11 L6a Sla	0	0	0
4933402C05Rik	71025	7	RIKEN cDNA 4933402C05 gene	ncRNA	0	0	N9 L5b Cdh13	0	0	0	0	C11 L6a Sla	0	0	NA
4933402C06Rik	71029	7	RIKEN cDNA 4933402C06 gene	ncRNA	0	0	N9 L5b Cdh13	0	0.0285714	0	0	C1 Pvalb Wt1	0.615	0.0625	0
4933402D24Rik	74426	1	RIKEN cDNA 4933402D24 gene	protein-coding	0	0	N10 L5b Tph2	1.37437	0.061583	0	0	C10 L5b Tph2	1.05556	0.0774284	0.0942455
4933402J07Rik	330820	8	RIKEN cDNA 4933402J07 gene	protein-coding	0	0	N9 L5b Cdh13	0	0	0	0	C11 L6a Sla	0	0	NA
4933402J10Rik	71057	5	RIKEN cDNA 4933402J10 gene	ncRNA	0	0	N9 L5b Cdh13	0	0.0169492	0	0	C11 L6a Sla	0	0.02	NA
4933402J15Rik	74425	14	RIKEN cDNA 4933402J15 gene	ncRNA	0	0	N4 L5a Hsd11b1	0.0162712	0.0267815	0	0	C2 Sst Cbln4	0.0495652	0.0380155	0.0710349
4933402N03Rik	233918	7	RIKEN cDNA 4933402N03 gene	protein-coding	0	0	N9 L5b Cdh13	0	0	0	0	C11 L6a Sla	0	0.047619	NA
4933402N22Rik	545732	5	RIKEN cDNA 4933402N22 gene	protein-coding	0	0	N9 L5b Cdh13	0	0	0	0	C11 L6a Sla	0	0	NA
4933402P03Rik	108803	11	SPEM family member 2	protein-coding	0	0	N9 L5b Cdh13	0	0	0	0	C11 L6a Sla	0	0	NA
4933404G15Rik	74066	16	RIKEN cDNA 4933404G15 gene	ncRNA	0	0	N9 L5b Cdh13	0	0.0294118	0	0	C11 L6a Sla	0	0	NA
4933404K08Rik	74061	13	RIKEN cDNA 4933404K08 gene	ncRNA	0	0	N9 L5b Cdh13	0	0	0	0	C3 L4 Arf5	0.152444	0.0111111	0
4933404K13Rik	71018	10	RIKEN cDNA 4933404K13 gene	ncRNA	0	0	N9 L5b Cdh13	0	0	0	0	C11 L6a Sla	0	0	NA
4933404O12Rik	66752	5	RIKEN cDNA 4933404O12 gene	ncRNA	0	0	N7 L6a Mgp	4.07316	0.116133	0	3	C10 L5b Tph2	5.13074	0.346575	0.185617
4933405D12Rik	74057	3	RIKEN cDNA 4933405D12 gene	ncRNA	0	0	N4 L5a Hsd11b1	0.668983	0.0605653	0	0	C4 L5a Hsd11b1	0.370526	0.105913	0.729349
4933405E24Rik	71056	11	RIKEN cDNA 4933405E24 gene	ncRNA	0	0	N9 L5b Cdh13	0	0.0295803	0	0	C11 L6a Sla	0	0.0075188	NA
4933405L10Rik	71046	8	RIKEN cDNA 4933405L10 gene	protein-coding	0	0	N9 L5b Cdh13	2.65471	0.0216029	0	0	C2 Sst Cbln4	1.23478	0.0640744	0.1234
4933406B17Rik	71040	8	RIKEN cDNA 4933406B17 gene	unknown	0	0	N7 L6a Mgp	1.27947	0.0390599	0	0	C7 L6a Mgp	0.174762	0.0358667	0.35588
4933406C10Rik	74076	12	RIKEN cDNA 4933406C10 gene	ncRNA	0	0	N10 L5b Tph2	2.4275	0.130516	0	0	C3 L4 Arf5	1.15767	0.159737	0.502906
4933406D12Rik	74065	2	RIKEN cDNA 4933406D12 gene	ncRNA	0	0	N9 L5b Cdh13	0	0	0	0	C11 L6a Sla	0	0	NA
4933406F09Rik	68308	14	RIKEN cDNA 4933406F09 gene	ncRNA	0	0	N9 L5b Cdh13	0	0	0	0	C11 L6a Sla	0	0	NA
4933406G16Rik	74059	11	RIKEN cDNA 4933406G16 gene	ncRNA	0	0	N9 L5b Cdh13	0	0	0	0	C11 L6a Sla	0	0	NA
4933406I18Rik	71045	7	RIKEN cDNA 4933406I18 gene	ncRNA	2	9	N7 L6a Mgp	9.80105	0.240031	2	9	C3 L4 Arf5	2.24122	0.172006	0.645513
4933406J08Rik	74401	2	telomere repeat binding bouquet formation protein 2	protein-coding	0	0	N9 L5b Cdh13	0	0	0	0	C11 L6a Sla	0	0.02	NA
4933406J10Rik	77800	7	RIKEN cDNA 4933406J10 gene	ncRNA	0	0	N10 L5b Tph2	1.92906	0.0621447	0	0	C2 Sst Cbln4	0.636522	0.0769176	0.19232
4933406K04Rik	71033	12	RIKEN cDNA 4933406K04 gene	ncRNA	0	0	N9 L5b Cdh13	0	0.148042	0	0	C11 L6a Sla	0	0.175161	NA
4933406M09Rik	240755	1	RIKEN cDNA 4933406M09 gene	protein-coding	0	0	N9 L5b Cdh13	0	0	0	0	C4 L5a Hsd11b1	0.263008	0.0075188	0
4933407E24Rik	108809	4	RIKEN cDNA 4933407E24 gene	ncRNA	0	0	N8 L5 Chrna6	11.6573	0.12896	0	0	C10 L5b Tph2	0.468148	0.165374	0.632528
4933407G14Rik	71125	10	RIKEN cDNA 4933407G14 gene	ncRNA	0	0	N9 L5b Cdh13	0	0	0	0	C11 L6a Sla	0	0.0075188	NA
4933407I05Rik	74072	9	RIKEN cDNA 4933407I05 gene	ncRNA	0	0	N5 L5a Batf3	1.1098	0.0702367	0	0	C6 L6a Car12	1.44846	0.13535	0.105004
4933407I08Rik	71009	18	RIKEN cDNA 4933407I08 gene	unknown	2	8	N2 Sst Cbln4	20.0427	0.324002	2	8	C2 Sst Cbln4	3.09	0.376459	0.973262
4933407L21Rik	71141	1	RIKEN cDNA 4933407L21 gene	ncRNA	0	0	N8 L5 Chrna6	11.7109	0.101187	0	0	C4 L5a Hsd11b1	6.81015	0.178563	0.385123
4933408B17Rik	271508	18	RIKEN cDNA 4933408B17 gene	protein-coding	0	0	N10 L5b Tph2	2.35844	0.169725	0	0	C4 L5a Hsd11b1	1.13188	0.105111	0.422075
4933408J17Rik	74454	10	RIKEN cDNA 4933408J17 gene	ncRNA	0	0	N8 L5 Chrna6	1.44727	0.156516	2	9	C8 L5 Chrna6	4.78667	0.119637	0.0606583
4933408N05Rik	71122	8	RIKEN cDNA 4933408N05 gene	ncRNA	0	0	N10 L5b Tph2	3.12375	0.319149	0	0	C10 L5b Tph2	0.557407	0.252294	0.510972
4933409F18Rik	74668	12	RIKEN cDNA 4933409F18 gene	ncRNA	0	0	N3 L4 Arf5	0.00468354	0	0	0	C11 L6a Sla	0	0.0294766	0
4933409G03Rik	227998	2	RIKEN cDNA 4933409G03 gene	protein-coding	0	0	N9 L5b Cdh13	0	0.0243902	0	0	C11 L6a Sla	0	0.02	NA
4933411E08Rik	71067	10	RIKEN cDNA 4933411E08 gene	ncRNA	0	0	N9 L5b Cdh13	0	0.0262741	0	0	C5 L5a Batf3	0.0994	0.0538463	0
4933411G06Rik	71090	10	Sumo1 pseudogene	pseudo	0	0	N9 L5b Cdh13	0	0	0	0	C11 L6a Sla	0	0	NA
4933411G11Rik	330228	5	speedy/RINGO cell cycle regulator family, member E4B	protein-coding	0	0	N9 L5b Cdh13	0	0	0	0	C11 L6a Sla	0	0	NA
4933411K16Rik	66765	19	RIKEN cDNA 4933411K16 gene	protein-coding	0	0	N9 L5b Cdh13	0	0	0	0	C11 L6a Sla	0	0	NA
4933412E12Rik	71086	10	RIKEN cDNA 4933412E12 gene	ncRNA	0	0	N8 L5 Chrna6	5.31364	0.100007	0	3	C11 L6a Sla	7.57087	0.329625	0.0607168
4933412E24Rik	71088	15	RIKEN cDNA 4933412E24 gene	protein-coding	0	0	N9 L5b Cdh13	0	0	0	0	C11 L6a Sla	0	0	NA
4933412O06Rik	71071	13	RIKEN cDNA 4933412O06 gene	ncRNA	0	0	N4 L5a Hsd11b1	2.18237	0.15798	0	1	C5 L5a Batf3	3.03	0.263021	0.198865
4933413G19Rik	71149	6	testis expressed 52	protein-coding	0	0	N3 L4 Arf5	0.149367	0.0316147	0	0	C6 L6a Car12	0.0226923	0.0323454	0
4933413J09Rik	71106	14	RIKEN cDNA 4933413J09 gene	ncRNA	0	0	N3 L4 Arf5	3.51823	0.0278026	0	0	C3 L4 Arf5	0.530222	0.043948	0.765015
4933413L06Rik	71100	13	RIKEN cDNA 4933413L06 gene	ncRNA	2	8	N10 L5b Tph2	22.9966	0.359713	2	7	C9 L5b Cdh13	4.24517	0.408081	0.875513
4933414I15Rik	74408	11	RIKEN cDNA 4933414I15 gene	unknown	0	0	N9 L5b Cdh13	0	0	0	0	C11 L6a Sla	0	0	NA
4933415F23Rik	66755	1	RIKEN cDNA 4933415F23 gene	protein-coding	0	0	N9 L5b Cdh13	0	0	0	0	C11 L6a Sla	0	0	NA
4933416C03Rik	619332	10	RIKEN cDNA 4933416C03 gene	protein-coding	0	0	N1 Pvalb Wt1	3.29857	0.0472923	0	0	C10 L5b Tph2	0.231481	0.0715757	0
4933416E03Rik	71081	2	RIKEN cDNA 4933416E03 gene	ncRNA	0	0	N9 L5b Cdh13	0	0	0	0	C11 L6a Sla	0	0	NA
4933416M06Rik	71174	13	RIKEN cDNA 4933416M06 gene	ncRNA	0	0	N9 L5b Cdh13	0	0.041508	0	0	C9 L5b Cdh13	0.158621	0.035351	0
4933416M07Rik	71082	8	RIKEN cDNA 4933416M07 gene	ncRNA	0	0	N9 L5b Cdh13	0	0.0757633	0	0	C9 L5b Cdh13	0.0731034	0.0321012	0
4933416O17Rik	67550	13	RIKEN cDNA 4933416O17 gene	ncRNA	0	0	N9 L5b Cdh13	0	0	0	0	C11 L6a Sla	0	0	NA
4933417A18Rik	66761	13	RIKEN cDNA 4933417A18 gene	protein-coding	0	0	N9 L5b Cdh13	0	0.0126582	0	0	C3 L4 Arf5	0.00733333	0	0
4933417D19Rik	71186	8	RIKEN cDNA 4933417D19 gene	ncRNA	0	0	N3 L4 Arf5	4.11354	0.121371	0	5	C8 L5 Chrna6	2.64444	0.486948	0.248874
4933417E11Rik	71134	1	RIKEN cDNA 4933417E11 gene	ncRNA	0	0	N9 L5b Cdh13	0	0.010101	0	0	C11 L6a Sla	0	0.0287262	NA
4933417G07Rik	71182	3	SEC13 homolog pseudogene	pseudo	0	0	N4 L5a Hsd11b1	0.105085	0.0169492	0	0	C4 L5a Hsd11b1	0.309248	0.0075188	0.134706
4933417O13Rik	71153	7	RIKEN cDNA 4933417O13 gene	ncRNA	0	0	N9 L5b Cdh13	0	0	0	0	C11 L6a Sla	0	0	NA
4933421I07Rik	71162	7	RIKEN cDNA 4933421I07 gene	protein-coding	0	0	N9 L5b Cdh13	0	0	0	0	C11 L6a Sla	0	0	NA
4933421O10Rik	100504166	4	RIKEN cDNA 4933421O10 gene	ncRNA	0	1	N11 L6a Sla	12.8641	0.2719	2	2	C1 Pvalb Wt1	3.71312	0.302285	0.427787
4933422A05Rik	71133	9	RIKEN cDNA 4933422A05 gene	ncRNA	0	0	N5 L5a Batf3	1.70475	0.0170535	0	0	C11 L6a Sla	0	0	0
4933424G05Rik	74456	18	RIKEN cDNA 4933424G05 gene	ncRNA	0	3	N2 Sst Cbln4	5.68045	0.310298	0	3	C3 L4 Arf5	3.12111	0.351435	0.420058
4933424G06Rik	71166	1	RIKEN cDNA 4933424G06 gene	ncRNA	0	0	N11 L6a Sla	7.53406	0.182045	0	2	C8 L5 Chrna6	3.96889	0.340437	0.531116
4933424M12Rik	67548	4	RIKEN cDNA 4933424M12 gene	ncRNA	0	0	N3 L4 Arf5	1.98152	0.044569	0	0	C11 L6a Sla	0	0	0
4933425B07Rik	74458	14	RIKEN cDNA 4933425B07 gene	ncRNA	0	0	N9 L5b Cdh13	0	0	0	0	C6 L6a Car12	0.0107692	0.0332306	0
4933425L06Rik	66763	13	RIKEN cDNA 4933425L06 gene	protein-coding	0	0	N9 L5b Cdh13	0	0.0255623	0	0	C11 L6a Sla	0	0.0150376	NA
4933427D06Rik	232217	6	RIKEN cDNA 4933427D06 gene	ncRNA	0	0	N10 L5b Tph2	2.315	0.0625	0	0	C10 L5b Tph2	0.34	0.037037	1
4933427D14Rik	74477	11	RIKEN cDNA 4933427D14 gene	protein-coding	1	8	N9 L5b Cdh13	31.4991	0.286865	2	9	C3 L4 Arf5	14.1846	0.272145	0.840607
4933427E11Rik	66769	15	RIKEN cDNA 4933427E11 gene	ncRNA	0	0	N5 L5a Batf3	0.315556	0.04021	0	0	C11 L6a Sla	0.533913	0.0500323	0.0682443
4933427E13Rik	71234	11	RIKEN cDNA 4933427E13 gene	ncRNA	0	0	N3 L4 Arf5	0.214177	0.0260779	0	0	C3 L4 Arf5	0.0401111	0.060968	0.535419
4933427G17Rik	74466	7	major facilitator superfamily domain containing 13B	protein-coding	0	0	N4 L5a Hsd11b1	0.00661017	0.0141855	0	0	C3 L4 Arf5	0.191556	0.009534	0.0133478
4933427G23Rik	330053	5	RIKEN cDNA 4933427G23 gene	unknown	0	0	N3 L4 Arf5	2.35266	0.0301203	0	0	C10 L5b Tph2	0.688889	0.0640282	0.157172
4933427I22Rik	71235	4	RIKEN cDNA 4933427I22 gene	ncRNA	0	0	N9 L5b Cdh13	0	0	0	0	C11 L6a Sla	0	0	NA
4933428C19Rik	71293	4	RIKEN cDNA 4933428C19 gene	ncRNA	0	0	N4 L5a Hsd11b1	0.485593	0.0255066	0	0	C3 L4 Arf5	0.170333	0.0690325	0.401779
4933428G20Rik	100141474	11	RIKEN cDNA 4933428G20 gene	protein-coding	0	1	N4 L5a Hsd11b1	4.17712	0.253217	0	3	C3 L4 Arf5	1.88578	0.271152	0.665434
4933429K18Rik	71232	19	RIKEN cDNA 4933429K18 gene	ncRNA	0	0	N9 L5b Cdh13	0	0	0	0	C11 L6a Sla	0	0	NA
4933429O19Rik	66770	14	RIKEN cDNA 4933429O19 gene	ncRNA	0	0	N9 L5b Cdh13	0	0	0	0	C6 L6a Car12	0.0230769	0	0
4933430H16Rik	71285	7	RIKEN cDNA 4933430H16 gene	ncRNA	0	0	N9 L5b Cdh13	0.305294	0.0388637	0	0	C4 L5a Hsd11b1	0.00383459	0.0563878	0
4933430I17Rik	214106	4	RIKEN cDNA 4933430I17 gene	protein-coding	0	0	N2 Sst Cbln4	0.789091	0.0285025	0	0	C8 L5 Chrna6	0.126667	0.0952415	0.0566087
4933430M04Rik	71316	11	RIKEN cDNA 4933430M04 gene	ncRNA	0	0	N5 L5a Batf3	2.11071	0.30132	0	0	C4 L5a Hsd11b1	1.5318	0.225227	0.581836
4933430N04Rik	71249	8	RIKEN cDNA 4933430N04 gene	ncRNA	0	0	N9 L5b Cdh13	0	0	0	0	C11 L6a Sla	0	0	NA
4933431E20Rik	329735	3	RIKEN cDNA 4933431E20 gene	ncRNA	1	1	N3 L4 Arf5	8.51544	0.179959	2	9	C6 L6a Car12	11.6581	0.170949	0.183084
4933431G14Rik	71265	6	RIKEN cDNA 4933431G14 gene	ncRNA	0	0	N8 L5 Chrna6	11.8791	0.191394	0	0	C3 L4 Arf5	6.88922	0.266103	0.616817
4933431J24Rik	71298	14	RIKEN cDNA 4933431J24 gene	ncRNA	0	0	N9 L5b Cdh13	0	0	0	0	C3 L4 Arf5	0.00388889	0	0
4933431K23Rik	74475	8	RIKEN cDNA 4933431K23 gene	ncRNA	0	0	N9 L5b Cdh13	0	0	0	0	C11 L6a Sla	0	0	NA
4933432G23Rik	71196	9	RIKEN cDNA 4933432G23 gene	ncRNA	0	0	N9 L5b Cdh13	0	0	0	0	C11 L6a Sla	0	0	NA
4933432I03Rik	71264	14	RIKEN cDNA 4933432I03 gene	ncRNA	0	0	N11 L6a Sla	5.20094	0.0481004	0	0	C4 L5a Hsd11b1	0.74203	0.0340576	0.617386
4933432I09Rik	66779	16	RIKEN cDNA 4933432I09 gene	ncRNA	0	0	N3 L4 Arf5	9.06722	0.084687	0	0	C4 L5a Hsd11b1	6.0215	0.215204	0.468461
4933432K03Rik	75793	7	RIKEN cDNA 4933432K03 gene	ncRNA	0	0	N9 L5b Cdh13	0	0	0	0	C6 L6a Car12	0.257308	0.0431259	0
4933433C11Rik	74472	2	sperm tail PG rich repeat containing 3	protein-coding	0	0	N9 L5b Cdh13	0	0	0	0	C6 L6a Car12	0.395	0.0423062	0
4933433F19Rik	71314	8	RIKEN cDNA 4933433F19 gene	ncRNA	0	0	N9 L5b Cdh13	0	0	0	0	C11 L6a Sla	0	0	NA
4933433G08Rik	66785	9	RIKEN cDNA 4933433G08 gene	ncRNA	0	0	N9 L5b Cdh13	0	0	0	0	C11 L6a Sla	0	0	NA
4933433G15Rik	71274	9	RIKEN cDNA 4933433G15 gene	ncRNA	0	0	N1 Pvalb Wt1	4.06257	0.0464241	0	0	C4 L5a Hsd11b1	0.293609	0.0453061	0.499236
4933433G19Rik	71226	13	RIKEN cDNA 4933433G19 gene	ncRNA	1	2	N10 L5b Tph2	5.73813	0.252859	2	8	C10 L5b Tph2	3.58593	0.313002	0.31996
4933433H22Rik	74473	17	RIKEN cDNA 4933433H22 gene	ncRNA	0	0	N9 L5b Cdh13	0	0	0	0	C11 L6a Sla	0	0	NA
4933433N18Rik	71252	13	RIKEN cDNA 4933433N18 gene	ncRNA	0	0	N9 L5b Cdh13	0	0	0	0	C11 L6a Sla	0	0	NA
4933434E20Rik	99650	3	RIKEN cDNA 4933434E20 gene	protein-coding	2	9	N2 Sst Cbln4	31.7018	0.190185	2	9	C1 Pvalb Wt1	25.6988	0.0760893	0.243235
4933436E23Rik	71209	1	RIKEN cDNA 4933436E23 gene	ncRNA	0	0	N9 L5b Cdh13	0	0.0169492	0	0	C9 L5b Cdh13	0.0713793	0.0344828	0
4933436H12Rik	71244	7	RIKEN cDNA 4933436H12 gene	ncRNA	0	0	N9 L5b Cdh13	0	0	0	0	C11 L6a Sla	0	0	NA
4933436I20Rik	71290	1	RIKEN cDNA 4933436I20 gene	unknown	0	0	N5 L5a Batf3	0.227879	0.0408598	0	0	C6 L6a Car12	0.0496154	0.0283661	0.731503
4933438A12Rik	71243	15	RIKEN cDNA 4933438A12 gene	unknown	0	0	N9 L5b Cdh13	0	0	0	0	C11 L6a Sla	0	0.0294766	NA
4933438B17Rik	71247	5	RIKEN cDNA 4933438B17 gene	ncRNA	0	0	N9 L5b Cdh13	0	0	0	0	C11 L6a Sla	0	0	NA
4933438K21Rik	71270	4	RIKEN cDNA 4933438K21 gene	ncRNA	0	0	N9 L5b Cdh13	0	0	0	0	C11 L6a Sla	0	0	NA
4933439C10Rik	74476	11	RIKEN cDNA 4933439C10 gene	ncRNA	2	9	N8 L5 Chrna6	278.255	0.233828	2	9	C3 L4 Arf5	80.2133	0.0782043	0.94157
4933439K11Rik	71319	1	RIKEN cDNA 4933439K11 gene	ncRNA	0	0	N8 L5 Chrna6	1.85545	0.114629	0	0	C8 L5 Chrna6	2.40444	0.188651	0.233503
4933440J02Rik	71321	10	RIKEN cDNA 4933440J02 gene	ncRNA	0	0	N9 L5b Cdh13	0	0	0	0	C11 L6a Sla	0	0	NA
4933440M02Rik	71208	7	RIKEN cDNA 4933440M02 gene	ncRNA	0	0	N9 L5b Cdh13	0	0	0	0	C11 L6a Sla	0	0	NA
5031410I06Rik	381622	5	RIKEN cDNA 5031410I06 gene	protein-coding	0	0	N2 Sst Cbln4	0.323636	0.136364	0	0	C2 Sst Cbln4	0.00434783	0	1
5031414D18Rik	271221	14	RUN and cysteine rich domain containing beclin 1 interacting protein like	protein-coding	0	0	N11 L6a Sla	23.2175	0.350696	0	1	C11 L6a Sla	4.49	0.547157	0.777156
5031425E22Rik	269630	5	RIKEN cDNA 5031425E22 gene	ncRNA	0	0	N7 L6a Mgp	15.6879	0.193534	2	8	C11 L6a Sla	9.45522	0.197589	0.437613
5031425F14Rik	319684	2	RIKEN cDNA 5031425F14 gene	ncRNA	0	0	N5 L5a Batf3	0.415051	0.0265425	0	0	C5 L5a Batf3	0.7388	0.0822926	0.100974
5031426D15Rik	68144	2	RIKEN cDNA 5031426D15 gene	ncRNA	0	9	N4 L5a Hsd11b1	107.587	0.558095	0	9	C3 L4 Arf5	52.5046	0.608485	0.958143
5031434C07Rik	100503613	6	RIKEN cDNA 5031434C07 gene	ncRNA	0	0	N6 L6a Car12	2.48	0.0243902	0	0	C11 L6a Sla	0	0	0
5031434O11Rik	100039684	3	RIKEN cDNA 5031434O11 gene	ncRNA	0	0	N10 L5b Tph2	35.555	0.177358	1	0	C11 L6a Sla	5.95522	0.141719	0.360327
5031439G07Rik	223739	15	RIKEN cDNA 5031439G07 gene	protein-coding	2	9	N10 L5b Tph2	78.9375	0.248554	2	9	C10 L5b Tph2	14.8933	0.178208	0.882618
5033403F01Rik	75958	13	RIKEN cDNA 5033403F01 gene	ncRNA	0	0	N10 L5b Tph2	2.27969	0.0276437	0	0	C10 L5b Tph2	0.571481	0.0731602	0.299468
5033403H07Rik	75954	5	RIKEN cDNA 5033403H07 gene	ncRNA	0	0	N9 L5b Cdh13	0	0.0238213	0	0	C11 L6a Sla	0	0.0506605	NA
5033404E19Rik	114668	1	NSA2 ribosome biogenesis homolog pseudogene	pseudo	0	0	N9 L5b Cdh13	0	0	0	0	C11 L6a Sla	0	0	NA
5033406O09Rik	77675	12	RIKEN cDNA 5033406O09 gene	ncRNA	0	0	N4 L5a Hsd11b1	0.322034	0.0169492	0	0	C2 Sst Cbln4	2.7087	0.123662	0.0455195
5033417F24Rik	75995	1	RIKEN cDNA 5033417F24 gene	ncRNA	0	0	N9 L5b Cdh13	4.82588	0.0834335	2	8	C11 L6a Sla	11.9548	0.327922	0.114783
5033421B08Rik	75990	12	RIKEN cDNA 5033421B08 gene	ncRNA	0	0	N6 L6a Car12	1.4539	0.0431327	0	0	C3 L4 Arf5	0.334778	0.0640768	0.968662
5033426O07Rik	76001	8	RIKEN cDNA 5033426O07 gene	ncRNA	0	0	N1 Pvalb Wt1	2.03229	0.0285714	0	0	C11 L6a Sla	0	0	0
5033428I22Rik	75996	8	RIKEN cDNA 5033428I22 gene	ncRNA	0	0	N9 L5b Cdh13	0	0.0243902	0	0	C11 L6a Sla	0	0	NA
5033430I15Rik	76000	13	RIKEN cDNA 5033430I15 gene	unknown	0	0	N5 L5a Batf3	5.85576	0.0625105	0	1	C5 L5a Batf3	6.236	0.281118	0.141337
5133400J02Rik	71297	11	pluripotency associated transcript 20	ncRNA	0	0	N9 L5b Cdh13	0	0	0	0	C11 L6a Sla	0	0.037037	NA
5330411J11Rik	76676	2	RIKEN cDNA 5330411J11 gene	ncRNA	0	0	N9 L5b Cdh13	0	0	0	0	C4 L5a Hsd11b1	0.00481203	0.0355835	0
5330413P13Rik	414081	2	RIKEN cDNA 5330413P13 gene	ncRNA	0	0	N3 L4 Arf5	2.90557	0.0671168	0	0	C4 L5a Hsd11b1	0.643008	0.168554	0.276247
5330416C01Rik	403201	13	RIKEN cDNA 5330416C01 gene	unknown	0	0	N7 L6a Mgp	4.11789	0.286328	0	2	C6 L6a Car12	3.51846	0.442114	0.27004
5330417C22Rik	229722	3	RIKEN cDNA 5330417C22 gene	protein-coding	2	9	N7 L6a Mgp	23.1821	0.154416	2	9	C3 L4 Arf5	15.1973	0.0429127	0.603614
5330426P16Rik	68190	16	Dppa2 upstream binding RNA	ncRNA	0	0	N10 L5b Tph2	11.3613	0.10601	0	0	C6 L6a Car12	2.665	0.248947	0.277887
5330432E05Rik	383820	3	RIKEN cDNA 5330432E05 gene	unknown	0	0	N9 L5b Cdh13	0	0	0	0	C11 L6a Sla	0	0	NA
5330438D12Rik	327824	10	RIKEN cDNA 5330438D12 gene	unknown	2	3	N1 Pvalb Wt1	67.7591	0.205171	2	7	C2 Sst Cbln4	26.6991	0.328113	0.600032
5330439A09Rik	77103	8	RIKEN cDNA 5330439A09 gene	ncRNA	0	0	N7 L6a Mgp	3.59368	0.0632537	0	0	C4 L5a Hsd11b1	0.306767	0.0817569	0.442349
5330439B14Rik	321015	6	RIKEN cDNA 5330439B14 gene	ncRNA	0	0	N9 L5b Cdh13	0	0	0	0	C11 L6a Sla	0.0778261	0.0434783	0
5430401F13Rik	71392	6	RIKEN cDNA 5430401F13 gene	protein-coding	0	0	N9 L5b Cdh13	0	0.0526316	0	0	C11 L6a Sla	0	0	NA
5430401H09Rik	100504461	12	RIKEN cDNA 5430401H09 gene	unknown	0	0	N9 L5b Cdh13	0	0.0434946	0	0	C11 L6a Sla	0	0	NA
5430402O13Rik	73183	6	RIKEN cDNA 5430402O13 gene	ncRNA	0	0	N10 L5b Tph2	3.57281	0.145087	0	1	C11 L6a Sla	3.66696	0.181912	0.240313
5430403N17Rik	330737	8	RIKEN cDNA 5430403N17 gene	ncRNA	0	0	N9 L5b Cdh13	0	0	0	0	C11 L6a Sla	0	0.0307646	NA
5430405H02Rik	74487	2	RIKEN cDNA 5430405H02 gene	ncRNA	1	8	N10 L5b Tph2	22.2544	0.169362	2	9	C3 L4 Arf5	10.6304	0.135701	0.555665
5430416N02Rik	100503199	5	RIKEN cDNA 5430416N02 gene	ncRNA	0	0	N6 L6a Car12	29.9556	0.192885	2	8	C10 L5b Tph2	19.093	0.248625	0.326438
5430416O09Rik	71406	4	small regulatory polypeptide of amino acid response	protein-coding	0	0	N11 L6a Sla	0.306563	0.03125	0	0	C4 L5a Hsd11b1	0.0496241	0.0163927	0
5430419D17Rik	71395	7	RIKEN cDNA 5430419D17 gene	protein-coding	0	0	N9 L5b Cdh13	0	0.0729253	0	0	C11 L6a Sla	0	0.0323409	NA
5430421F17Rik	74489	8	RIKEN cDNA 5430421F17 gene	ncRNA	0	0	N5 L5a Batf3	0.946061	0.010101	0	0	C9 L5b Cdh13	0.286552	0.0569717	0
5430421N21Rik	NA	NA	NA	NA	0	0	N9 L5b Cdh13	0	0	0	0	C11 L6a Sla	0	0	NA
5430425K12Rik	71416	13	RIKEN cDNA 5430425K12 gene	ncRNA	0	0	N9 L5b Cdh13	0	0	0	0	C11 L6a Sla	0	0.047619	NA
5430427M07Rik	71349	12	RIKEN cDNA 5430427M07 gene	ncRNA	0	0	N1 Pvalb Wt1	0.474286	0.0233662	0	0	C4 L5a Hsd11b1	0.0195489	0.0272684	0
5430431A17Rik	71368	7	RIKEN cDNA 5430431A17 gene	ncRNA	0	0	N1 Pvalb Wt1	3.26114	0.073792	0	0	C11 L6a Sla	1.12478	0.0675549	0.472535
5430434I15Rik	71342	3	RIKEN cDNA 5430434I15 gene	ncRNA	0	0	N9 L5b Cdh13	0	0	0	0	C11 L6a Sla	0	0	NA
5430435G22Rik	226421	1	RAB7B, member RAS oncogene family	protein-coding	0	0	N3 L4 Arf5	0.951899	0.0233662	0	0	C9 L5b Cdh13	1.45172	0.0344828	0
5430435K18Rik	71357	5	RIKEN cDNA 5430435K18 gene	ncRNA	0	0	N9 L5b Cdh13	0	0	0	0	C11 L6a Sla	0	0.0111111	NA
5430437J10Rik	71432	15	RIKEN cDNA 5430437J10 gene	ncRNA	0	0	N1 Pvalb Wt1	0.209429	0.127899	0	0	C3 L4 Arf5	0.0623333	0.0792536	0.0864226
5430440P10Rik	71362	14	RIKEN cDNA 5430440P10 gene	ncRNA	0	0	N6 L6a Car12	0.39439	0.027954	0	0	C6 L6a Car12	0.143846	0.0388105	0.536519
5530400C23Rik	232426	6	RIKEN cDNA 5530400C23 gene	protein-coding	0	0	N9 L5b Cdh13	0	0	0	0	C11 L6a Sla	0	0	NA
5530401A14Rik	71388	11	RIKEN cDNA 5530401A14 gene	ncRNA	1	9	N9 L5b Cdh13	8.61824	0.285051	1	9	C3 L4 Arf5	7.19922	0.340637	0.645877
5730403I07Rik	70487	9	RIKEN cDNA 5730403I07 gene	ncRNA	0	0	N9 L5b Cdh13	0	0	0	0	C11 L6a Sla	0	0	NA
5730408K05Rik	67531	19	RIKEN cDNA 5730408K05 gene	ncRNA	0	0	N6 L6a Car12	36.929	0.0931094	1	1	C11 L6a Sla	10.4726	0.154943	0.525482
5730409E04Rik	230757	4	RIKEN cDNA 5730409E04Rik gene	protein-coding	0	0	N2 Sst Cbln4	20.0368	0.105472	2	9	C3 L4 Arf5	26.7607	0.146749	0.129608
5730409K12Rik	70494	19	RIKEN cDNA 5730409K12 gene	unknown	0	1	N10 L5b Tph2	8.215	0.219091	0	8	C3 L4 Arf5	6.08233	0.397322	0.340904
5730419F03Rik	70537	1	RIKEN cDNA 5730419F03 gene	ncRNA	0	0	N9 L5b Cdh13	0	0.010101	0	0	C11 L6a Sla	0.0173913	0.0355835	0
5730420D15Rik	70523	10	RIKEN cDNA 5730420D15 gene	ncRNA	0	0	N4 L5a Hsd11b1	0.542881	0.0567344	0	0	C11 L6a Sla	0.548696	0.0737594	0.225787
5730422E09Rik	433966	5	RIKEN cDNA 5730422E09 gene	ncRNA	2	8	N3 L4 Arf5	8.60911	0.190712	2	9	C4 L5a Hsd11b1	3.94902	0.11467	0.665088
5730435O14Rik	70538	10	RIKEN cDNA 5730435O14 gene	ncRNA	0	0	N9 L5b Cdh13	0	0	0	0	C5 L5a Batf3	0.3962	0.0360006	0
5730455P16Rik	70591	11	RIKEN cDNA 5730455P16 gene	protein-coding	0	2	N5 L5a Batf3	17.5382	0.21544	2	9	C9 L5b Cdh13	23.8969	0.14927	0.178305
5730457N03Rik	70593	6	even skipped homeotic gene 1, opposite strand	ncRNA	0	0	N9 L5b Cdh13	0	0	0	0	C11 L6a Sla	0	0	NA
5730460C07Rik	70594	3	RIKEN cDNA 5730460C07 gene	ncRNA	0	0	N9 L5b Cdh13	0	0	0	0	C11 L6a Sla	0	0	NA
5730480H06Rik	70592	5	RIKEN cDNA 5730480H06 gene	ncRNA	0	3	N9 L5b Cdh13	19.6218	0.264749	2	9	C8 L5 Chrna6	13.4167	0.325365	0.335863
5730488B01Rik	70602	4	RIKEN cDNA 5730488B01 gene	ncRNA	0	0	N9 L5b Cdh13	0	0	0	0	C11 L6a Sla	0	0	NA
5730507C01Rik	236366	12	RIKEN cDNA 5730507C01 gene	protein-coding	0	0	N7 L6a Mgp	2.91158	0.0633765	0	0	C11 L6a Sla	0.668261	0.07193	0.145096
5730508B09Rik	70617	3	family with sequence similarity 241, member A	protein-coding	0	0	N7 L6a Mgp	40.5653	0.274753	0	4	C7 L6a Mgp	11.0086	0.377656	0.581756
5730522E02Rik	70626	11	RIKEN cDNA 5730522E02 gene	ncRNA	1	9	N9 L5b Cdh13	36.3682	0.350803	2	9	C7 L6a Mgp	17.191	0.348868	0.615808
5730559C18Rik	67313	1	RIKEN cDNA 5730559C18 gene	protein-coding	0	0	N6 L6a Car12	1.4339	0.0434034	0	0	C9 L5b Cdh13	0.130345	0.0494834	0.404823
5830403F22Rik	74743	7	RIKEN cDNA 5830403F22 gene	ncRNA	0	0	N9 L5b Cdh13	0	0	0	0	C9 L5b Cdh13	0.0658621	0.103448	0
5830410O09Rik	74750	14	RIKEN cDNA 5830410O09 gene	unknown	0	0	N3 L4 Arf5	0.00848101	0	0	0	C9 L5b Cdh13	0.0155172	0.0344828	0
5830411N06Rik	244234	7	RIKEN cDNA 5830411N06 gene	protein-coding	0	0	N9 L5b Cdh13	0	0.010101	0	0	C11 L6a Sla	0	0.0111111	NA
5830415F09Rik	74753	4	tRNA methyltransferase O	protein-coding	0	0	N7 L6a Mgp	6.35579	0.0975436	0	3	C2 Sst Cbln4	2.18174	0.249673	0.437675
5830416I19Rik	74757	5	RIKEN cDNA 5830416I19 gene	ncRNA	0	0	N3 L4 Arf5	0.978228	0.0452496	0	0	C4 L5a Hsd11b1	0.890075	0.0564701	0.273772
5830416P10Rik	381232	19	myocardial infarction associated transcript 1	ncRNA	0	1	N11 L6a Sla	11.34	0.51288	0	2	C11 L6a Sla	2.66957	0.573374	0.796849
5830417I10Rik	100302730	3	gon-4-like pseudogene	pseudo	2	9	N4 L5a Hsd11b1	5.97441	0.120334	2	9	C3 L4 Arf5	3.64378	0.0869565	0.585352
5830418P13Rik	100529079	9	RIKEN cDNA 5830418P13 gene	ncRNA	0	0	N3 L4 Arf5	5.73051	0.139897	0	0	C10 L5b Tph2	0.686296	0.185632	0.577874
5830428H23Rik	414758	19	zinc finger protein 950	protein-coding	2	9	N7 L6a Mgp	43.3342	0.0935152	2	9	C3 L4 Arf5	13.3337	0.0434783	0.885334
5830428M24Rik	76062	12	RIKEN cDNA 5830428M24 gene	ncRNA	0	0	N9 L5b Cdh13	0	0	0	0	C11 L6a Sla	0	0	NA
5830432E09Rik	67765	7	RIKEN cDNA 5830432E09 gene	ncRNA	0	0	N1 Pvalb Wt1	5.79143	0.257838	2	3	C1 Pvalb Wt1	4.23594	0.533247	0.413386
5830433I10Rik	76030	17	RIKEN cDNA 5830433I10 gene	protein-coding	0	1	N9 L5b Cdh13	9.92853	0.201435	2	1	C2 Sst Cbln4	4.20696	0.216185	0.545834
5830444B04Rik	641454	4	RIKEN cDNA 5830444B04 gene	ncRNA	0	0	N3 L4 Arf5	5.45101	0.211513	1	5	C4 L5a Hsd11b1	1.79474	0.263603	0.517356
5830454E08Rik	76100	9	RIKEN cDNA 5830454E08 gene	ncRNA	0	0	N3 L4 Arf5	18.8363	0.0914177	0	0	C3 L4 Arf5	7.58422	0.174991	0.612244
5830473C10Rik	622307	5	RIKEN cDNA 5830473C10 gene	protein-coding	0	0	N8 L5 Chrna6	1.03818	0.0618022	0	0	C4 L5a Hsd11b1	0.217895	0.0439119	0
5930403L14Rik	320939	4	RIKEN cDNA 5930403L14 gene	ncRNA	0	0	N3 L4 Arf5	0.00392405	0	0	0	C11 L6a Sla	0	0	0
5930412G12Rik	319616	5	RIKEN cDNA 5930412G12 gene	ncRNA	0	0	N3 L4 Arf5	4.99949	0.0543133	0	1	C8 L5 Chrna6	8.66	0.340016	0.0573452
5930430L01Rik	319982	5	RIKEN cDNA 5930430L01 gene	ncRNA	0	0	N8 L5 Chrna6	7.14273	0.11949	0	0	C3 L4 Arf5	3.24678	0.200457	0.689518
5930438M14Rik	328324	13	RIKEN cDNA 5930438M14 gene	ncRNA	0	0	N6 L6a Car12	2.97805	0.0359184	0	0	C5 L5a Batf3	1.2164	0.098253	0.216559
6030407O03Rik	109198	1	RIKEN cDNA 6030407O03 gene	ncRNA	0	0	N3 L4 Arf5	0.437342	0.0553148	0	0	C8 L5 Chrna6	0.995556	0.0632353	0.0463199
6030408B16Rik	77717	15	RIKEN cDNA 6030408B16 gene	ncRNA	0	0	N8 L5 Chrna6	0.981818	0.0909091	0	0	C7 L6a Mgp	0.171905	0.0506512	0
6030419C18Rik	319477	9	RIKEN cDNA 6030419C18 gene	protein-coding	0	0	N5 L5a Batf3	4.13525	0.205636	2	7	C5 L5a Batf3	4.1888	0.264161	0.168575
6030426L16Rik	628850	12	RIKEN cDNA 6030426L16 gene	unknown	0	0	N3 L4 Arf5	0.0164557	0.0285714	0	0	C11 L6a Sla	0.0295652	0	0
6030440G07Rik	77878	12	RIKEN cDNA 6030440G07 gene	ncRNA	0	0	N3 L4 Arf5	0.0334177	0.0635793	0	0	C11 L6a Sla	0	0.0350548	0
6030442E23Rik	77880	7	RIKEN cDNA 6030442E23 gene	ncRNA	0	0	N9 L5b Cdh13	0	0	0	0	C11 L6a Sla	0	0.0434783	NA
6030443J06Rik	320719	5	RIKEN cDNA 6030443J06 gene	ncRNA	0	0	N5 L5a Batf3	0.875556	0.0790648	0	0	C7 L6a Mgp	0.782381	0.201288	0.163477
6030458C11Rik	77877	15	RIKEN cDNA 6030458C11 gene	protein-coding	0	4	N9 L5b Cdh13	14.4121	0.271151	2	9	C4 L5a Hsd11b1	10.7074	0.119451	0.416071
6030466F02Rik	234863	8	RIKEN cDNA 6030466F02 gene	ncRNA	0	0	N9 L5b Cdh13	0	0	0	0	C11 L6a Sla	0	0	NA
6030468B19Rik	77727	11	RIKEN cDNA 6030468B19 gene	protein-coding	0	0	N9 L5b Cdh13	0	0.0243902	0	0	C11 L6a Sla	0	0.037037	NA
6030469F06Rik	100043065	12	RIKEN cDNA 6030469F06 gene	ncRNA	0	0	N9 L5b Cdh13	0	0	0	0	C11 L6a Sla	0	0.0434783	NA
6230400D17Rik	76133	14	RIKEN cDNA 6230400D17 gene	ncRNA	0	0	N11 L6a Sla	8.50938	0.139875	2	7	C2 Sst Cbln4	9.30652	0.536082	0.258267
6330403A02Rik	381310	1	mechanosensory transduction mediator	protein-coding	0	1	N5 L5a Batf3	8.25465	0.329032	0	5	C5 L5a Batf3	10.4594	0.584039	0.137566
6330403K07Rik	103712	11	RIKEN cDNA 6330403K07 gene	protein-coding	1	5	N11 L6a Sla	125.842	0.374059	1	9	C5 L5a Batf3	285.353	0.593797	0.11744
6330407A03Rik	70720	4	RIKEN cDNA 6330407A03 gene	ncRNA	0	0	N3 L4 Arf5	0.120127	0.0114127	0	0	C11 L6a Sla	0	0	0
6330408A02Rik	321008	7	zinc finger SWIM-type containing 9	protein-coding	0	0	N1 Pvalb Wt1	5.09457	0.0829213	0	3	C4 L5a Hsd11b1	3.79143	0.201741	0.259276
6330409D20Rik	70730	2	RIKEN cDNA 6330409D20 gene	protein-coding	0	0	N2 Sst Cbln4	7.31727	0.100806	0	0	C1 Pvalb Wt1	3.30687	0.217223	0.158366
6330410L21Rik	319224	3	RIKEN cDNA 6330410L21 gene	ncRNA	0	0	N1 Pvalb Wt1	0.174	0.0285714	0	0	C11 L6a Sla	0	0	0
6330415B21Rik	70753	6	RIKEN cDNA 6330415B21 gene	ncRNA	0	4	N4 L5a Hsd11b1	46.7029	0.232513	0	5	C3 L4 Arf5	19.1878	0.270169	0.968627
6330415G19Rik	320020	17	RIKEN cDNA 6330415G19 gene	ncRNA	0	0	N2 Sst Cbln4	7.275	0.125726	0	2	C11 L6a Sla	3.85565	0.264435	0.312882
6330416G13Rik	230279	4	transmembrane protein 268	protein-coding	0	0	N3 L4 Arf5	15.8992	0.273212	2	3	C3 L4 Arf5	10.3358	0.335247	0.505778
6330418K02Rik	69004	5	RIKEN cDNA 6330418K02 gene	ncRNA	0	0	N4 L5a Hsd11b1	6.9378	0.0581348	1	1	C8 L5 Chrna6	9.23667	0.288536	0.240771
6330420H09Rik	319551	7	RIKEN cDNA 6330420H09 gene	ncRNA	0	0	N3 L4 Arf5	0.11962	0.0126582	0	0	C11 L6a Sla	0	0	0
6330549D23Rik	229613	3	RIKEN cDNA 6330549D23 gene	pseudo	0	0	N9 L5b Cdh13	5.60941	0.171813	0	1	C11 L6a Sla	2.31087	0.218773	0.623629
6430411K18Rik	76880	12	RIKEN cDNA 6430411K18 gen	ncRNA	0	0	N2 Sst Cbln4	78.2405	0.197834	0	1	C3 L4 Arf5	13.5098	0.213205	0.779095
6430503K07Rik	78068	2	RIKEN cDNA 6430503K07 gene	ncRNA	0	0	N3 L4 Arf5	2.17165	0.0253165	0	0	C11 L6a Sla	0	0	0
6430531B16Rik	381933	7	RIKEN cDNA 6430531B16 gene	protein-coding	0	0	N6 L6a Car12	2.45634	0.0441085	0	0	C9 L5b Cdh13	0.568621	0.0825075	0.0904032
6430548M08Rik	234797	8	RIKEN cDNA 6430548M08 gene	protein-coding	1	4	N2 Sst Cbln4	28.93	0.380564	2	8	C4 L5a Hsd11b1	35.4495	0.382234	0.273821
6430550D23Rik	320095	2	RIKEN cDNA 6430550D23 gene	protein-coding	0	0	N1 Pvalb Wt1	4.23429	0.127402	0	0	C8 L5 Chrna6	0.805556	0.141881	0.440149
6430553K19Rik	619300	16	RIKEN cDNA 6430553K19 gene	unknown	0	0	N9 L5b Cdh13	0	0.0350417	0	0	C11 L6a Sla	0	0.0567004	NA
6430562O15Rik	320893	13	RIKEN cDNA 6430562O15 gene	ncRNA	0	0	N6 L6a Car12	6.43	0.0979019	2	7	C11 L6a Sla	8.13739	0.54039	0.183474
6430571L13Rik	235599	9	RIKEN cDNA 6430571L13 gene	protein-coding	0	0	N11 L6a Sla	3.34125	0.0945074	0	3	C9 L5b Cdh13	3.60655	0.346182	0.162013
6430573F11Rik	319582	8	RIKEN cDNA 6430573F11 gene	protein-coding	0	3	N10 L5b Tph2	31.1397	0.523355	1	3	C10 L5b Tph2	30.6993	0.516928	0.274811
6430584L05Rik	330324	6	RIKEN cDNA 6430584L05 gene	ncRNA	0	0	N5 L5a Batf3	2.6004	0.0761448	0	0	C3 L4 Arf5	4.73322	0.292685	0.201089
6430590A07Rik	619719	3	RIKEN cDNA 6430590A07 gene	protein-coding	1	9	N11 L6a Sla	24.885	0.23222	2	9	C3 L4 Arf5	5.57622	0.0920248	0.905852
6430590A10Rik	100043277	10	RIKEN cDNA 6430590A10 gene	ncRNA	0	0	N10 L5b Tph2	3.05437	0.0508836	0	0	C9 L5b Cdh13	0.704828	0.119417	0.526502
6430628N08Rik	76237	4	RIKEN cDNA 6430628N08 gene	protein-coding	0	0	N9 L5b Cdh13	0	0	0	0	C11 L6a Sla	0	0.047619	NA
6430710C18Rik	76218	2	RIKEN cDNA 6430710C18 gene	ncRNA	0	0	N9 L5b Cdh13	0	0.010101	0	0	C8 L5 Chrna6	0.202222	0.104461	0
6530402F18Rik	76220	2	RIKEN cDNA 6530402F18 gene	ncRNA	0	0	N6 L6a Car12	2.94122	0.122468	0	1	C6 L6a Car12	2.13	0.424989	0.211615
6530403H02Rik	320739	3	RIKEN cDNA 6530403H02 gene	ncRNA	0	0	N9 L5b Cdh13	0.0185294	0.0769828	0	0	C7 L6a Mgp	0.0490476	0.190264	0
6530411M01Rik	67791	17	RIKEN cDNA 6530411M01 gene	ncRNA	0	0	N2 Sst Cbln4	2.95318	0.129549	1	0	C1 Pvalb Wt1	7.08625	0.587435	0.0547649
6720432D03Rik	77740	9	RIKEN cDNA 6720432D03 gene	ncRNA	0	0	N9 L5b Cdh13	0	0.0294118	0	0	C11 L6a Sla	0.03	0.0434783	0
6720468P15Rik	78073	19	RIKEN cDNA 6720468P15 gene	ncRNA	0	0	N1 Pvalb Wt1	1.70543	0.0233662	0	0	C1 Pvalb Wt1	3.62094	0.295931	0.158526
6720483E21Rik	77741	1	RIKEN cDNA 6720483E21 gene	ncRNA	0	0	N8 L5 Chrna6	11.4882	0.0567773	0	0	C4 L5a Hsd11b1	2.13985	0.102489	0.466152
6720489N17Rik	211378	13	RIKEN cDNA 6720489N17 gene	protein-coding	0	0	N1 Pvalb Wt1	7.062	0.0872551	0	0	C2 Sst Cbln4	3.15261	0.136358	0.462807
6820408C15Rik	228778	2	RIKEN cDNA 6820408C15 gene	protein-coding	0	0	N11 L6a Sla	1.9825	0.0683832	0	0	C10 L5b Tph2	1.16667	0.166483	0.238361
6820426E19Rik	100126203	6	RIKEN cDNA 6820426E19 gene	unknown	0	0	N9 L5b Cdh13	0	0	0	0	C4 L5a Hsd11b1	0.0174436	0.0075188	0
6820431F20Rik	547150	8	cadherin 11 pseudogene	pseudo	2	9	N8 L5 Chrna6	3.21455	0.0871422	2	9	C3 L4 Arf5	1.37722	0.0703295	0.603244
7420426K07Rik	546157	9	RIKEN cDNA 7420426K07 gene	protein-coding	0	0	N9 L5b Cdh13	0	0	0	0	C11 L6a Sla	0	0	NA
7420461P10Rik	100038657	1	RIKEN cDNA 7420461P10 gene	protein-coding	0	0	N9 L5b Cdh13	0	0.0223842	0	0	C10 L5b Tph2	0.0233333	0.0560265	0
7420700N18Rik	74517	8	RIKEN cDNA 7420700N18 gene	ncRNA	0	0	N9 L5b Cdh13	0	0	0	0	C11 L6a Sla	0	0	NA
7420701I03Rik	71457	12	RIKEN cDNA 7420701I03 gene	ncRNA	0	0	N2 Sst Cbln4	7.49273	0.143872	0	0	C1 Pvalb Wt1	0.258437	0.0955258	1
7530416G11Rik	328577	15	RIKEN cDNA 7530416G11 gene	protein-coding	0	0	N9 L5b Cdh13	0.696471	0.0760874	0	0	C4 L5a Hsd11b1	0.297368	0.162732	0.0573162
7530428D23Rik	319506	3	RIKEN cDNA 7530428D23 gene	ncRNA	0	0	N9 L5b Cdh13	1.04765	0.0294118	0	0	C2 Sst Cbln4	0.0347826	0.068822	0
7630403G23Rik	77119	9	RIKEN cDNA 7630403G23 gene	ncRNA	0	0	N3 L4 Arf5	0.400886	0.0379854	0	0	C11 L6a Sla	0	0	0
8030411F24Rik	78609	2	RIKEN cDNA 8030411F24 gene	protein-coding	0	0	N9 L5b Cdh13	0	0	0	0	C11 L6a Sla	0	0	NA
8030423F21Rik	211001	5	RIKEN cDNA 8030423F21 gene	ncRNA	0	0	N9 L5b Cdh13	0	0	0	0	C8 L5 Chrna6	0.504444	0.0914169	0
8030423J24Rik	77166	13	RIKEN cDNA 8030423J24 gene	protein-coding	0	0	N9 L5b Cdh13	0	0	0	0	C1 Pvalb Wt1	0.018125	0.03125	0
8030442B05Rik	77543	2	RIKEN cDNA 8030442B05 gene	ncRNA	0	0	N2 Sst Cbln4	0.783636	0.0325821	0	0	C11 L6a Sla	0	0.0346103	0
8030443G20Rik	77173	4	RIKEN cDNA 8030443G20 gene	ncRNA	0	0	N2 Sst Cbln4	17.4159	0.160426	2	0	C2 Sst Cbln4	8.99652	0.543712	0.202263
8030451A03Rik	100504061	4	RIKEN cDNA 8030451A03 gene	unknown	0	0	N9 L5b Cdh13	0	0.0417391	0	0	C8 L5 Chrna6	0.135556	0.0768322	0
8030451O07Rik	319533	16	RIKEN cDNA 8030451O07 gene	ncRNA	0	0	N1 Pvalb Wt1	9.31086	0.303417	0	0	C1 Pvalb Wt1	0.96625	0.276259	0.978112
8030453O22Rik	77209	6	RIKEN cDNA 8030453O22 gene	unknown	0	0	N6 L6a Car12	4.27659	0.225716	0	2	C6 L6a Car12	3.98615	0.434882	0.238799
8030455M16Rik	77171	8	RIKEN cDNA 8030455M16 gene	ncRNA	0	0	N3 L4 Arf5	0.278481	0.0126582	0	0	C4 L5a Hsd11b1	0.0130827	0.0075188	0
8030462N17Rik	212163	18	RIKEN cDNA 8030462N17 gene	protein-coding	1	9	N7 L6a Mgp	4.74474	0.179023	2	9	C3 L4 Arf5	3.27389	0.0583452	0.41517
8430415O14Rik	71484	6	RIKEN cDNA 8430415O14 gene	ncRNA	0	0	N2 Sst Cbln4	1.95364	0.168656	0	0	C3 L4 Arf5	0.541889	0.177709	0.417772
8430419K02Rik	74518	11	RIKEN cDNA 8430419K02 gene	ncRNA	0	0	N9 L5b Cdh13	0	0	0	0	C11 L6a Sla	0	0	NA
8430419L09Rik	74525	6	family with sequence similarity 234, member B	protein-coding	2	9	N1 Pvalb Wt1	58.112	0.201681	2	9	C10 L5b Tph2	66.9974	0.0434783	0.27039
8430422H06Rik	74529	18	RIKEN cDNA 8430422H06 gene	ncRNA	0	0	N9 L5b Cdh13	0	0.027954	0	0	C11 L6a Sla	0	0.058589	NA
8430423G03Rik	71473	5	RIKEN cDNA 8430423G03 gene	ncRNA	0	0	N9 L5b Cdh13	0.887353	0.0338127	0	0	C3 L4 Arf5	0.217556	0.0222222	0.695413
8430426J06Rik	78102	15	RIKEN cDNA 8430426J06 gene	ncRNA	0	0	N10 L5b Tph2	3.45344	0.09375	0	0	C10 L5b Tph2	1.88296	0.084702	0.1007
8430429K09Rik	71523	11	RIKEN cDNA 8430429K09 gene	ncRNA	0	1	N7 L6a Mgp	24.0032	0.226816	2	9	C4 L5a Hsd11b1	5.97947	0.181037	0.373813
8430430B14Rik	78148	17	RIKEN cDNA 8430430B14 gene	ncRNA	0	0	N9 L5b Cdh13	0	0	0	0	C11 L6a Sla	0	0	NA
8430431K14Rik	78103	19	RIKEN cDNA 8430431K14 gene	ncRNA	0	0	N3 L4 Arf5	2.41987	0.0643829	0	0	C3 L4 Arf5	2.22144	0.0878975	0.443857
8430436N08Rik	71510	4	RIKEN cDNA 8430436N08 gene	ncRNA	0	0	N5 L5a Batf3	0.31697	0.0360302	0	0	C11 L6a Sla	1.47174	0.0339774	0.0228659
8430437L04Rik	74541	2	RIKEN cDNA 8430437L04 gene	ncRNA	0	0	N9 L5b Cdh13	0	0	0	0	C11 L6a Sla	0	0	NA
9030025P20Rik	100041574	17	RIKEN cDNA 9030025P20 gene	protein-coding	0	0	N4 L5a Hsd11b1	1.40102	0.124983	0	0	C2 Sst Cbln4	0.521304	0.143625	0.688719
9030204H09Rik	77665	2	RIKEN cDNA 9030204H09 gene	ncRNA	0	0	N1 Pvalb Wt1	9.48171	0.0551393	0	0	C3 L4 Arf5	4.23433	0.110794	0.399415
9030404E10Rik	71528	16	RIKEN cDNA 9030404E10 gene	ncRNA	0	0	N10 L5b Tph2	0.157188	0.09375	0	0	C10 L5b Tph2	0.392963	0.0478161	0.0446476
9030612E09Rik	74530	10	RIKEN cDNA 9030612E09 gene	ncRNA	0	0	N10 L5b Tph2	8.05687	0.166845	0	0	C2 Sst Cbln4	3.54478	0.10007	0.35649
9030616G12Rik	77699	10	RIKEN cDNA 9030616G12 gene	ncRNA	0	0	N9 L5b Cdh13	0	0	0	0	C11 L6a Sla	0	0	NA
9030619P08Rik	105892	15	lymphocyte antigen 6 complex pseudogene	pseudo	0	0	N9 L5b Cdh13	0	0	0	0	C11 L6a Sla	0	0	NA
9030622O22Rik	100043820	2	RIKEN cDNA 9030622O22 gene	unknown	0	0	N7 L6a Mgp	0.00263158	0.03125	0	0	C9 L5b Cdh13	0.0113793	0.0536853	0
9030624G23Rik	66808	12	RIKEN cDNA 9030624G23 gene	protein-coding	0	0	N6 L6a Car12	0.747317	0.107454	0	0	C5 L5a Batf3	0.3692	0.161093	0.252185
9030624J02Rik	71517	7	RIKEN cDNA 9030624J02 gene	protein-coding	2	9	N1 Pvalb Wt1	25.6703	0.221859	2	9	C10 L5b Tph2	18.5444	0.100621	0.316331
9030625G05Rik	71545	18	RIKEN cDNA 9030625G05 gene	ncRNA	0	0	N7 L6a Mgp	0.0721053	0	0	0	C5 L5a Batf3	0.0112	0	0.224074
9130001E16Rik	71575	18	RIKEN cDNA 9130001E16 gene	ncRNA	0	0	N9 L5b Cdh13	0	0	0	0	C11 L6a Sla	0	0	NA
9130008F23Rik	71583	17	RIKEN cDNA 9130008F23 gene	protein-coding	0	0	N9 L5b Cdh13	0	0	0	0	C3 L4 Arf5	0.239444	0.0146335	0
9130011E15Rik	71617	19	RIKEN cDNA 9130011E15 gene	protein-coding	2	8	N3 L4 Arf5	6.26418	0.327743	2	9	C3 L4 Arf5	3.14789	0.0759425	0.728247
9130015A21Rik	71581	12	RIKEN cDNA 9130015A21 gene	ncRNA	0	0	N9 L5b Cdh13	0	0	0	0	C2 Sst Cbln4	0.0252174	0.0075188	0
9130015L21Rik	71613	2	RIKEN cDNA 9130015L21 gene	ncRNA	0	0	N9 L5b Cdh13	0	0.0285714	0	0	C11 L6a Sla	0	0	NA
9130019O22Rik	78921	7	RIKEN cDNA 9130019O22 gene	protein-coding	0	0	N7 L6a Mgp	2.81632	0.0411608	0	0	C6 L6a Car12	1.13346	0.104846	0.269377
9130019P16Rik	100042056	6	RIKEN cDNA 9130019P16 gene	ncRNA	0	1	N11 L6a Sla	5.88438	0.252857	2	6	C11 L6a Sla	12.4757	0.538488	0.188709
9130023H24Rik	100043133	7	RIKEN cDNA 9130023H24 gene	protein-coding	0	0	N6 L6a Car12	2.40683	0.0594932	0	0	C5 L5a Batf3	0.708	0.119395	0.128031
9130024F11Rik	329160	1	RIKEN cDNA 9130024F11 gene	ncRNA	0	4	N8 L5 Chrna6	32.8291	0.413306	0	8	C3 L4 Arf5	18.0387	0.730515	0.335169
9130204L05Rik	229550	3	RIKEN cDNA 9130204L05 gene	protein-coding	0	0	N9 L5b Cdh13	0	0.0114127	0	0	C11 L6a Sla	0	0.0075188	NA
9130208D14Rik	77700	7	RIKEN cDNA 9130208D14 gene	unknown	0	0	N2 Sst Cbln4	0.460455	0.0364936	0	0	C7 L6a Mgp	0.0695238	0.0356486	0.259133
9130209A04Rik	77668	18	RIKEN cDNA 9130209A04 gene	ncRNA	0	0	N3 L4 Arf5	1.85722	0.0126582	0	0	C11 L6a Sla	0	0	0
9130221F21Rik	330350	6	RIKEN cDNA 9130221F21 gene	ncRNA	0	0	N6 L6a Car12	0.0639024	0.0349835	0	0	C10 L5b Tph2	0.0237037	0.0351967	0
9130221H12Rik	77124	7	RIKEN cDNA 9130221H12 gene	ncRNA	0	0	N11 L6a Sla	11.4878	0.134744	2	9	C8 L5 Chrna6	12.6144	0.29211	0.173298
9130227L01Rik	329159	1	RIKEN cDNA 9130227L01 gene	ncRNA	0	0	N6 L6a Car12	3.87024	0.0852232	0	0	C3 L4 Arf5	1.10356	0.139778	0.616532
9130230L23Rik	231253	5	RIKEN cDNA 9130230L23 gene	ncRNA	0	0	N9 L5b Cdh13	0	0.03125	0	0	C4 L5a Hsd11b1	0.0209023	0.0150376	0
9130401M01Rik	75758	15	RIKEN cDNA 9130401M01 gene	protein-coding	0	1	N8 L5 Chrna6	41.07	0.191371	2	9	C8 L5 Chrna6	57.5789	0.123628	0.127045
9130409I23Rik	619326	1	RIKEN cDNA 9130409I23 gene	protein-coding	0	0	N8 L5 Chrna6	0.254545	0.062287	0	0	C6 L6a Car12	0.0223077	0.0718012	0
9130409J20Rik	71576	11	transmembrane protein 238 like	ncRNA	0	0	N9 L5b Cdh13	0	0	0	0	C11 L6a Sla	0	0	NA
9230009I02Rik	619293	11	RIKEN cDNA 9230009I02 gene	ncRNA	0	0	N9 L5b Cdh13	0	0	0	0	C4 L5a Hsd11b1	0.0125564	0.0111111	0
9230019H11Rik	215728	10	RIKEN cDNA 9230019H11 gene	unknown	0	0	N9 L5b Cdh13	0	0	0	0	C11 L6a Sla	0	0	NA
9230020A06Rik	619299	11	RIKEN cDNA 9230020A06 gene	unknown	0	0	N9 L5b Cdh13	0	0.0169492	0	0	C11 L6a Sla	0	0	NA
9230102K24Rik	109335	10	RIKEN cDNA 9230102K24 gene	ncRNA	0	3	N5 L5a Batf3	2.37727	0.24351	1	4	C5 L5a Batf3	1.3456	0.352222	0.19902
9230102O04Rik	77682	2	RIKEN cDNA 9230102O04 gene	ncRNA	0	0	N9 L5b Cdh13	0	0	0	0	C11 L6a Sla	0	0	NA
9230104L09Rik	77705	2	RIKEN cDNA 9230104L09 gene	protein-coding	0	0	N9 L5b Cdh13	0	0	0	0	C11 L6a Sla	0	0	NA
9230105E05Rik	320626	10	RIKEN cDNA 9230105E05 gene	ncRNA	0	0	N5 L5a Batf3	0.00333333	0	0	0	C9 L5b Cdh13	0.00793103	0	0
9230110C19Rik	234912	9	RIKEN cDNA 9230110C19 gene	protein-coding	0	3	N6 L6a Car12	12.0763	0.33787	1	7	C6 L6a Car12	13.5665	0.324938	0.214359
9230110F15Rik	77080	9	RIKEN cDNA 9230110F15 gene	protein-coding	0	0	N2 Sst Cbln4	2.41045	0.0387841	0	0	C4 L5a Hsd11b1	0.0643609	0.0311071	0
9230112D13Rik	78243	14	RIKEN cDNA 9230112D13 gene	protein-coding	0	0	N9 L5b Cdh13	0	0	0	0	C11 L6a Sla	0	0.0380155	NA
9230112J17Rik	100504561	9	RIKEN cDNA 9230112J17 gene	ncRNA	0	0	N10 L5b Tph2	5.91625	0.104339	0	0	C4 L5a Hsd11b1	1.71594	0.162444	0.672533
9230113P08Rik	77908	9	RIKEN cDNA 9230113P08 gene	protein-coding	0	0	N2 Sst Cbln4	1.56955	0.0762162	0	0	C7 L6a Mgp	0.310476	0.0425455	0
9230114K14Rik	414108	5	RIKEN cDNA 9230114K14 gene	ncRNA	0	0	N10 L5b Tph2	19.8372	0.208524	0	4	C9 L5b Cdh13	11.7307	0.415604	0.148511
9230116L04Rik	321017	12	RIKEN cDNA 9230116L04 gene	ncRNA	0	0	N1 Pvalb Wt1	7.902	0.211036	2	1	C8 L5 Chrna6	2.03778	0.374957	0.555695
9230116N13Rik	320054	1	RIKEN cDNA 9230116N13 gene	ncRNA	0	0	N1 Pvalb Wt1	1.68743	0.102065	0	0	C1 Pvalb Wt1	0.74125	0.15207	0.383651
9230117E06Rik	78082	16	RIKEN cDNA 9230117E06 gene	ncRNA	0	0	N9 L5b Cdh13	3.11471	0.134763	0	0	C3 L4 Arf5	0.883889	0.231389	0.52626
9330020H09Rik	100048895	15	RIKEN cDNA 9330020H09 gene	ncRNA	0	1	N11 L6a Sla	8.78969	0.182057	2	8	C3 L4 Arf5	3.16722	0.17438	0.624616
9330102E08Rik	330427	6	RIKEN cDNA 9330102E08 gene	ncRNA	0	0	N10 L5b Tph2	12.2128	0.165288	0	3	C3 L4 Arf5	5.29811	0.270904	0.439761
9330104G04Rik	320950	7	RIKEN cDNA 9330104G04 gene	unknown	0	0	N6 L6a Car12	3.58244	0.0693453	0	0	C3 L4 Arf5	0.551	0.144732	0.315175
9330111N05Rik	319983	13	RIKEN cDNA 9330111N05 gene	ncRNA	0	0	N9 L5b Cdh13	0	0.0615626	0	0	C1 Pvalb Wt1	0.118438	0.166828	0
9330117O12Rik	328957	18	RIKEN cDNA 9330117O12 gene	ncRNA	0	0	N4 L5a Hsd11b1	2.67763	0.0256898	0	0	C2 Sst Cbln4	0.261304	0.0434783	0
9330133O14Rik	100689703	8	RIKEN cDNA 9330133O14 gene	ncRNA	0	0	N11 L6a Sla	19.3203	0.150062	0	1	C3 L4 Arf5	6.39367	0.227072	0.508893
9330136K24Rik	319870	17	RIKEN cDNA 9330136K24 gene	ncRNA	0	0	N3 L4 Arf5	6.58734	0.128225	0	0	C4 L5a Hsd11b1	2.66556	0.181882	0.809254
9330151L19Rik	414085	12	RIKEN cDNA 9330151L19 gene	ncRNA	0	0	N2 Sst Cbln4	50.2368	0.13626	2	9	C8 L5 Chrna6	21.1044	0.210964	0.5325
9330154J02Rik	442799	9	RIKEN cDNA 9330154J02 gene	unknown	0	0	N10 L5b Tph2	5.22719	0.253192	0	3	C11 L6a Sla	2.36957	0.476065	0.365898
9330154K18Rik	319829	15	RIKEN cDNA 9330154K18 gene	unknown	0	0	N6 L6a Car12	0.397805	0.0407219	0	0	C3 L4 Arf5	0.581444	0.0601911	0.314063
9330155M09Rik	320756	16	RIKEN cDNA 9330155M09 gene	unknown	1	5	N3 L4 Arf5	80.5999	0.288461	0	3	C3 L4 Arf5	28.234	0.307025	0.967659
9330158H04Rik	319472	6	RIKEN cDNA 9330158H04 gene	ncRNA	0	0	N11 L6a Sla	2.60594	0.121437	0	0	C11 L6a Sla	2.84174	0.242819	0.271547
9330159F19Rik	212448	10	RIKEN cDNA 9330159F19 gene	protein-coding	2	9	N4 L5a Hsd11b1	48.4434	0.103469	2	9	C3 L4 Arf5	28.5917	0.0434783	0.812738
9330159M07Rik	319673	9	RIKEN cDNA 9330159M07 gene	ncRNA	0	1	N10 L5b Tph2	6.54406	0.350496	1	1	C10 L5b Tph2	1.54296	0.367343	0.690388
9330162012Rik	493800	13	cDNA RIKEN 9330162012 gene	ncRNA	0	0	N2 Sst Cbln4	7.72455	0.100503	1	0	C3 L4 Arf5	4.14089	0.240256	0.374546
9330162B11Rik	320272	1	RIKEN cDNA 9330162B11 gene	ncRNA	0	0	N5 L5a Batf3	10.6073	0.118552	0	0	C5 L5a Batf3	1.2154	0.149411	0.602641
9330175E14Rik	320377	8	RIKEN cDNA 9330175E14 gene	ncRNA	0	0	N9 L5b Cdh13	0	0	0	0	C11 L6a Sla	0	0	NA
9330175M20Rik	442821	1	RIKEN cDNA 9330175M20 gene	ncRNA	0	0	N9 L5b Cdh13	1.73647	0.207929	0	3	C4 L5a Hsd11b1	0.323383	0.287615	0.129182
9330178D15Rik	329780	3	RIKEN cDNA 9330178D15 gene	ncRNA	0	0	N9 L5b Cdh13	0	0	0	0	C11 L6a Sla	0	0	NA
9330179D12Rik	77558	6	RIKEN cDNA 9330179D12 gene	ncRNA	0	0	N11 L6a Sla	15.8691	0.251721	2	6	C8 L5 Chrna6	22.2189	0.324922	0.149711
9330182L06Rik	231014	5	RIKEN cDNA 9330182L06 gene	protein-coding	2	8	N1 Pvalb Wt1	22.6486	0.289607	2	9	C11 L6a Sla	17.1526	0.29523	0.298063
9330182O14Rik	328531	15	RIKEN cDNA 9330182O14 gene	protein-coding	0	0	N9 L5b Cdh13	0	0	0	0	C11 L6a Sla	0	0	NA
9330188P03Rik	380930	14	RIKEN cDNA 9330188P03 gene	ncRNA	0	0	N9 L5b Cdh13	4.465	0.0846368	0	0	C1 Pvalb Wt1	1.35688	0.22157	0.403581
9330198N18Rik	77516	2	RIKEN cDNA 9330198N18 gene	ncRNA	0	0	N1 Pvalb Wt1	2.43457	0.0641355	0	0	C5 L5a Batf3	0.3082	0.208234	0.325752
9330199G10Rik	319466	13	RIKEN cDNA 9330199G10 gene	ncRNA	0	0	N9 L5b Cdh13	1.95735	0.0394802	0	0	C2 Sst Cbln4	0.212174	0.0684005	0.0182319
9430007A20Rik	381572	4	RIKEN cDNA 9430007A20 gene	protein-coding	0	0	N9 L5b Cdh13	0	0	0	0	C11 L6a Sla	0	0	NA
9430008C03Rik	68108	2	small nucleolar RNA host gene 17	ncRNA	0	0	N9 L5b Cdh13	8.74471	0.104891	0	0	C3 L4 Arf5	4.38156	0.159202	0.730569
9430014N10Rik	77248	15	RIKEN cDNA 9430014N10 gene	ncRNA	0	0	N3 L4 Arf5	0.267468	0.125994	0	0	C7 L6a Mgp	0.27	0.294995	0.279641
9430015G10Rik	230996	4	RIKEN cDNA 9430015G10 gene	protein-coding	0	0	N3 L4 Arf5	30.0727	0.232421	2	8	C6 L6a Car12	8.12962	0.249809	0.67805
9430018G01Rik	319812	6	RIKEN cDNA 9430018G01 gene	ncRNA	0	0	N4 L5a Hsd11b1	2.13	0.0475737	0	0	C7 L6a Mgp	0.377619	0.067712	0.215006
9430019J16Rik	77269	2	RIKEN cDNA 9430019J16 gene	ncRNA	0	0	N9 L5b Cdh13	0	0	0	0	C11 L6a Sla	0	0	NA
9430020K01Rik	240185	18	junctional cadherin 5 associated	protein-coding	0	8	N7 L6a Mgp	37.7074	0.559764	0	9	C10 L5b Tph2	32.047	0.671534	0.263121
9430021M05Rik	77288	2	RIKEN cDNA 9430021M05 gene	ncRNA	0	1	N6 L6a Car12	33.6922	0.304153	0	3	C11 L6a Sla	23.7622	0.497347	0.21858
9430024E24Rik	77257	2	RIKEN cDNA 9430024E24 gene	unknown	0	0	N6 L6a Car12	0.0117073	0.0294118	0	0	C9 L5b Cdh13	0.0468966	0.0384023	0
9430037G07Rik	320692	9	RIKEN cDNA 9430037G07 gene	ncRNA	0	0	N8 L5 Chrna6	4.09091	0.145469	0	0	C9 L5b Cdh13	1.04655	0.200477	0.250062
9430038I01Rik	77252	7	RIKEN cDNA 9430038I01 gene	protein-coding	0	0	N5 L5a Batf3	3.87949	0.0885427	1	1	C1 Pvalb Wt1	2.79	0.261131	0.218768
9430041J12Rik	77323	7	RIKEN cDNA 9430041J12 gene	ncRNA	0	3	N6 L6a Car12	6.19049	0.247158	0	9	C3 L4 Arf5	4.75889	0.265336	0.475403
9430060I03Rik	100037260	1	RIKEN cDNA 9430060I03 gene	ncRNA	0	1	N7 L6a Mgp	14.0432	0.219373	2	8	C11 L6a Sla	6.88174	0.306123	0.478304
9430065F17Rik	77857	13	RIKEN cDNA 9430065F17 gene	ncRNA	0	0	N6 L6a Car12	8.07756	0.0767282	0	0	C8 L5 Chrna6	5.28667	0.179408	0.390461
9430069I07Rik	77358	15	RIKEN cDNA 9430069I07 gene	protein-coding	0	0	N11 L6a Sla	4.38125	0.10992	0	0	C11 L6a Sla	1.59261	0.1945	0.479035
9430076C15Rik	231991	6	cAMP responsive element binding protein 5	protein-coding	0	0	N1 Pvalb Wt1	0.308	0.0384368	0	0	C1 Pvalb Wt1	0.140937	0.131764	0.264932
9430078G10Rik	619307	19	RIKEN cDNA 9430078G10 gene	unknown	0	0	N3 L4 Arf5	4.30304	0.0720303	0	0	C3 L4 Arf5	1.25411	0.138848	0.549129
9430078K24Rik	77290	12	RIKEN cDNA 9430078K24 gene	ncRNA	0	0	N9 L5b Cdh13	0	0	0	0	C5 L5a Batf3	0.0392	0.0234621	0
9430083A17Rik	77428	13	RIKEN cDNA 9430083A17 gene	ncRNA	0	0	N7 L6a Mgp	21.7484	0.117929	0	4	C7 L6a Mgp	8.11286	0.224548	0.702969
9430085M18Rik	77361	5	RIKEN cDNA 9430085M18 gene	ncRNA	0	0	N3 L4 Arf5	7.23646	0.173742	0	0	C3 L4 Arf5	4.61256	0.195702	0.329254
9430091E24Rik	434350	8	RIKEN cDNA 9430091E24 gene	ncRNA	0	0	N9 L5b Cdh13	6.64735	0.128075	2	2	C7 L6a Mgp	2.96571	0.179916	0.300897
9430097D07Rik	319245	2	RIKEN cDNA 9430097D07 gene	unknown	0	0	N9 L5b Cdh13	9.37	0.165482	0	0	C9 L5b Cdh13	7.24	0.28603	0.179629
9530002B09Rik	77432	4	RIKEN cDNA 9530002B09 gene	protein-coding	0	0	N9 L5b Cdh13	0	0	0	0	C11 L6a Sla	0	0	NA
9530003J23Rik	77397	10	RIKEN cDNA 9530003J23 gene	protein-coding	0	0	N5 L5a Batf3	0.798788	0.010101	0	0	C1 Pvalb Wt1	0.185	0.0813882	0.161623
9530004M14Rik	77370	8	RIKEN cDNA 9530004M14 gene	ncRNA	0	0	N9 L5b Cdh13	0	0	0	0	C11 L6a Sla	0	0	NA
9530014B07Rik	77398	13	RIKEN cDNA 9530014B07 gene	ncRNA	0	0	N9 L5b Cdh13	0	0	0	0	C11 L6a Sla	0	0	NA
9530020I12Rik	77442	12	RIKEN cDNA 9530020I12 gene	ncRNA	0	0	N3 L4 Arf5	0.0056962	0.0706474	0	0	C9 L5b Cdh13	0.0324138	0.0359754	0
9530026F06Rik	77341	1	RIKEN cDNA 9530026F06 gene	ncRNA	0	0	N9 L5b Cdh13	0	0	0	0	C11 L6a Sla	0	0	NA
9530026P05Rik	330385	6	RIKEN cDNA 9530026P05 gene	ncRNA	0	0	N11 L6a Sla	6.1425	0.0485636	0	0	C6 L6a Car12	0.055	0.0401235	0
9530034E10Rik	78615	4	RIKEN cDNA 9530034E10 gene	unknown	0	0	N10 L5b Tph2	1.44469	0.1278	0	0	C2 Sst Cbln4	0.4	0.151881	0.541284
9530036M11Rik	78616	6	RIKEN cDNA 9530036M11 gene	unknown	0	0	N4 L5a Hsd11b1	0.928475	0.0947179	0	0	C3 L4 Arf5	0.368778	0.0664757	0.514139
9530036O11Rik	654796	5	RIKEN cDNA 9530036O11Rik	ncRNA	0	0	N8 L5 Chrna6	2.86818	0.234503	1	3	C10 L5b Tph2	0.564815	0.398238	0.653071
9530047P18Rik	78419	14	RIKEN cDNA 9530047P18 gene	ncRNA	0	0	N11 L6a Sla	5.23344	0.0263055	0	0	C11 L6a Sla	1.74826	0.0625283	0.544217
9530052C20Rik	320229	3	RIKEN cDNA 9530052C20 gene	unknown	0	0	N1 Pvalb Wt1	3.28486	0.130674	0	0	C7 L6a Mgp	0.469524	0.0858851	0.47663
9530052E02Rik	619321	8	RIKEN cDNA 9530052E02 gene	ncRNA	1	2	N10 L5b Tph2	18.7544	0.3142	2	7	C3 L4 Arf5	4.173	0.328093	0.505738
9530053A07Rik	319482	7	RIKEN cDNA 9530053A07 gene	protein-coding	0	0	N3 L4 Arf5	0.107848	0.0359258	0	0	C10 L5b Tph2	0.0648148	0.0586677	0
9530053H05Rik	78425	19	RIKEN cDNA 9530053H05 gene	other	0	0	N2 Sst Cbln4	0.0159091	0	0	0	C6 L6a Car12	0.00961539	0	0
9530057J20Rik	78672	8	RIKEN cDNA 9530057J20 gene	protein-coding	0	0	N7 L6a Mgp	0.898947	0.0933311	0	0	C4 L5a Hsd11b1	0.305564	0.102743	0.706384
9530059O14Rik	319626	9	RIKEN cDNA 9530059O14 gene	ncRNA	2	8	N10 L5b Tph2	34.2344	0.253725	2	9	C4 L5a Hsd11b1	13.4139	0.238872	0.719482
9530062K07Rik	78739	6	RIKEN cDNA 9530062K07 gene	ncRNA	0	0	N6 L6a Car12	8.54122	0.218464	0	3	C10 L5b Tph2	2.48074	0.240504	0.613211
9530068E07Rik	213673	11	RIKEN cDNA 9530068E07 gene	protein-coding	0	0	N5 L5a Batf3	44.7544	0.113944	2	9	C10 L5b Tph2	56.7978	0.0909	0.162089
9530077C05Rik	68283	9	RIKEN cDNA 9530077C05 gene	protein-coding	0	1	N11 L6a Sla	7.57875	0.208153	2	8	C2 Sst Cbln4	4.81261	0.222605	0.343156
9530080O11Rik	319247	4	RIKEN cDNA 9530080O11 gene	ncRNA	0	7	N4 L5a Hsd11b1	28.3731	0.325397	2	9	C5 L5a Batf3	12.8548	0.181462	0.443282
9530082P21Rik	638247	17	RIKEN cDNA 9530082P21 gene	ncRNA	2	8	N2 Sst Cbln4	39.0814	0.132976	2	9	C4 L5a Hsd11b1	53.097	0.0255594	0.188055
9530091C08Rik	320440	9	RIKEN cDNA 9530091C08 gene	ncRNA	1	5	N4 L5a Hsd11b1	102.776	0.53651	1	5	C4 L5a Hsd11b1	43.7828	0.437364	0.991758
9630001P10Rik	319251	5	RIKEN cDNA 9630001P10 gene	ncRNA	0	0	N2 Sst Cbln4	1.47727	0.127488	0	0	C2 Sst Cbln4	0.816522	0.174427	0.127723
9630002D21Rik	319560	12	RIKEN cDNA 9630002D21 gene	ncRNA	1	0	N2 Sst Cbln4	14.7927	0.350109	2	0	C2 Sst Cbln4	3.90565	0.533758	0.845421
9630013A20Rik	319903	14	RIKEN cDNA 9630013A20 gene	ncRNA	0	0	N1 Pvalb Wt1	8.42286	0.149443	0	0	C11 L6a Sla	1.81304	0.249564	0.653622
9630013D21Rik	319743	4	RIKEN cDNA 9630013D21 gene	unknown	0	0	N9 L5b Cdh13	0	0	0	0	C11 L6a Sla	0	0	NA
9630013K17Rik	78883	11	RIKEN cDNA 9630013K17 gene	ncRNA	0	0	N1 Pvalb Wt1	4.74371	0.0914786	0	0	C4 L5a Hsd11b1	1.40902	0.0754979	0.599028
9630015K15Rik	78569	14	RIKEN cDNA 9630015K15 gene	ncRNA	0	0	N4 L5a Hsd11b1	9.79864	0.267212	0	0	C3 L4 Arf5	2.71522	0.18633	0.903734
9630028B13Rik	319562	1	RIKEN cDNA 9630028B13 gene	ncRNA	0	0	N3 L4 Arf5	1.11797	0.0372616	0	0	C3 L4 Arf5	0.391667	0.0553293	0.352201
9630028H03Rik	320684	2	RIKEN cDNA 9630028H03 gene	ncRNA	0	0	N9 L5b Cdh13	0	0	0	0	C11 L6a Sla	0	0	NA
9630028I04Rik	319720	17	RIKEN cDNA 9630028I04 gene	ncRNA	0	0	N9 L5b Cdh13	0	0	0	0	C2 Sst Cbln4	0.0226087	0.0434783	0
9630033F20Rik	319801	6	Trp53 induced glycolysis repulatory phosphatase	protein-coding	0	0	N1 Pvalb Wt1	4.06971	0.145781	2	7	C11 L6a Sla	7.90435	0.296854	0.0883916
9830107B12Rik	328829	17	RIKEN cDNA 9830107B12 gene	protein-coding	0	0	N9 L5b Cdh13	0	0	0	0	C11 L6a Sla	0	0	NA
9830132P13Rik	329753	3	RIKEN cDNA 9830132P13 gene	ncRNA	0	0	N10 L5b Tph2	0.0075	0.0258407	0	0	C9 L5b Cdh13	0.027931	0.0842264	0.0262749
9830147E19Rik	208111	7	zinc finger protein 976	protein-coding	0	0	N6 L6a Car12	8.03098	0.101704	0	1	C7 L6a Mgp	5.56048	0.304059	0.421843
9830166K06Rik	402757	19	RIKEN cDNA 9830166K06 gene	ncRNA	0	0	N3 L4 Arf5	6.07532	0.141875	0	0	C6 L6a Car12	3.58231	0.200684	0.505614
9930012K11Rik	268759	14	RIKEN cDNA 9930012K11 gene	protein-coding	0	0	N11 L6a Sla	10.7272	0.0444495	0	0	C2 Sst Cbln4	5.10739	0.147485	0.283896
9930014A18Rik	320469	15	RIKEN cDNA 9930014A18 gene	ncRNA	0	0	N8 L5 Chrna6	3.02364	0.171055	0	3	C8 L5 Chrna6	9.12222	0.723202	0.0577981
9930021J03Rik	240613	19	RIKEN cDNA 9930021J03 gene	protein-coding	2	9	N4 L5a Hsd11b1	19.6293	0.152847	2	9	C3 L4 Arf5	17.689	0.0343264	0.495333
9930038B18Rik	319503	12	RIKEN cDNA 9930038B18 gene	unknown	0	0	N9 L5b Cdh13	0	0	0	0	C11 L6a Sla	0	0	NA
9930104L06Rik	194268	4	RIKEN cDNA 9930104L06 gene	protein-coding	0	0	N8 L5 Chrna6	6.77545	0.0868934	2	7	C3 L4 Arf5	5.62544	0.203311	0.380072
9930111H07Rik	77762	1	RIKEN cDNA 9930111H07 gene	ncRNA	0	0	N9 L5b Cdh13	0	0	0	0	C11 L6a Sla	0	0	NA
9930111J21Rik1	667214	11	RIKEN cDNA 9930111J21 gene 1	protein-coding	0	0	N3 L4 Arf5	0.185063	0.035953	0	0	C2 Sst Cbln4	0.0213043	0.0357735	0
9930111J21Rik2	245240	11	RIKEN cDNA 9930111J21 gene 2	protein-coding	0	0	N6 L6a Car12	0.0268293	0.0243902	0	0	C11 L6a Sla	0	0	0
a	50518	2	nonagouti	protein-coding	0	0	N9 L5b Cdh13	0	0.0327033	0	0	C7 L6a Mgp	0.00333333	0.0075188	0
A130010J15Rik	319266	1	RIKEN cDNA A130010J15 gene	protein-coding	0	0	N8 L5 Chrna6	10.3591	0.107063	0	0	C8 L5 Chrna6	3.26111	0.206969	0.255981
A130030D18Rik	228116	2	RIKEN cDNA A130030D18 gene	unknown	0	0	N9 L5b Cdh13	0	0.0571429	0	0	C11 L6a Sla	0	0.15349	NA
A130051J06Rik	791370	15	RIKEN cDNA A130051J0 gene	unknown	0	0	N6 L6a Car12	1.82805	0.0615594	0	0	C3 L4 Arf5	0.575778	0.13526	0.481014
A130077B15Rik	319272	10	RIKEN cDNA A130077B15 gene	ncRNA	0	0	N8 L5 Chrna6	0.0418182	0	0	0	C5 L5a Batf3	0.0058	0	0
A1bg	117586	15	alpha-1-B glycoprotein	protein-coding	0	0	N9 L5b Cdh13	0	0	0	0	C11 L6a Sla	0	0	NA
A1cf	69865	19	APOBEC1 complementation factor	protein-coding	0	0	N10 L5b Tph2	0.028125	0.03125	0	0	C11 L6a Sla	0	0	0
A230001M10Rik	319951	3	RIKEN cDNA A230001M10 gene	ncRNA	0	0	N9 L5b Cdh13	0	0.0126582	0	0	C11 L6a Sla	0	0.0434783	NA
A230006K03Rik	27493	7	RIKEN cDNA A230006K03 gene	ncRNA	1	9	N8 L5 Chrna6	66.9582	0.369859	1	9	C3 L4 Arf5	26.1004	0.372181	0.858769
A230009B12Rik	319750	17	RIKEN cDNA A230009B12 gene	ncRNA	0	0	N1 Pvalb Wt1	4.30914	0.0761641	0	0	C4 L5a Hsd11b1	0.54609	0.0773665	0.755733
A230020J21Rik	100125339	1	RIKEN cDNA A230020J21 gene	ncRNA	0	0	N4 L5a Hsd11b1	2.0978	0.0629502	1	0	C1 Pvalb Wt1	1.37156	0.316287	0.290403
A230028O05Rik	319487	16	RIKEN cDNA A230028O05 gene	ncRNA	0	0	N9 L5b Cdh13	0	0	0	0	C11 L6a Sla	0	0	NA
A230046K03Rik	319277	10	WASH complex subunit 4	protein-coding	2	5	N2 Sst Cbln4	20.52	0.308686	2	9	C6 L6a Car12	10.5635	0.256883	0.516911
A230050P20Rik	319278	9	RIKEN cDNA A230050P20 gene	protein-coding	2	9	N2 Sst Cbln4	94.8955	0.140484	2	9	C2 Sst Cbln4	36.5552	0.031626	0.55228
A230051N06Rik	320593	17	RIKEN cDNA A230051N06 gene	ncRNA	0	0	N7 L6a Mgp	46.9668	0.163779	2	5	C7 L6a Mgp	23.7181	0.421612	0.3959
A230056J06Rik	319469	13	RIKEN cDNA A230056J06 gene	ncRNA	0	0	N10 L5b Tph2	5.01906	0.0805461	0	1	C8 L5 Chrna6	5.47667	0.256065	0.136192
A230056P14Rik	320845	7	RIKEN cDNA A230056P14 gene	ncRNA	2	5	N2 Sst Cbln4	29.0823	0.246514	2	9	C11 L6a Sla	18.4826	0.0644599	0.262707
A230057D06Rik	319893	7	RIKEN cDNA A230057D06 gene	ncRNA	2	9	N4 L5a Hsd11b1	45.5563	0.0114127	2	9	C4 L5a Hsd11b1	14.7933	0.0434783	0.981519
A230065H16Rik	380787	12	RIKEN cDNA A230065H16 gene	protein-coding	0	0	N1 Pvalb Wt1	0.0188571	0	0	0	C5 L5a Batf3	0.5108	0.038424	0
A230070E04Rik	100043072	14	RIKEN cDNA A230070E04 gene	ncRNA	0	7	N8 L5 Chrna6	56.6809	0.364356	2	9	C8 L5 Chrna6	111.357	0.268644	0.133025
A230072I06Rik	619290	8	RIKEN cDNA A230072I06 gene	unknown	0	0	N4 L5a Hsd11b1	0.00305085	0	0	0	C1 Pvalb Wt1	0.011875	0.03125	0
A230073K19Rik	NA	NA	NA	NA	2	9	N4 L5a Hsd11b1	124.042	0.0574883	2	9	C3 L4 Arf5	60.2712	0	0.927446
A230077H06Rik	320210	7	RIKEN cDNA A230077H06 gene	ncRNA	0	0	N5 L5a Batf3	8.96727	0.325009	2	1	C2 Sst Cbln4	4.1813	0.557661	0.491506
A230083G16Rik	442825	6	RIKEN cDNA A230083G16 gene	unknown	0	0	N8 L5 Chrna6	2.52545	0.21852	0	4	C11 L6a Sla	2.4913	0.353621	0.241977
A230087F16Rik	100503323	12	RIKEN cDNA A230087F16 gene	ncRNA	0	0	N11 L6a Sla	3.59344	0.155451	0	4	C4 L5a Hsd11b1	2.64759	0.319493	0.426275
A230098N10Rik	97209	5	RIKEN cDNA A230098N10 gene	unknown	0	0	N9 L5b Cdh13	0	0.0234226	0	0	C11 L6a Sla	0	0.0306125	NA
A230103J11Rik	320466	8	RIKEN cDNA A230103J11 gene	ncRNA	0	0	N11 L6a Sla	4.96469	0.120177	2	6	C9 L5b Cdh13	3.61724	0.317279	0.237048
A230103O09Rik	77753	13	RIKEN cDNA A230103O09 gene	unknown	0	0	N5 L5a Batf3	0.472424	0.0287323	0	0	C2 Sst Cbln4	0.611739	0.144275	0.040774
A230107N01Rik	320919	13	RIKEN cDNA A230107N01 gene	ncRNA	0	0	N2 Sst Cbln4	17.2586	0.133203	0	0	C2 Sst Cbln4	4.39043	0.176796	0.738669
A230108P19Rik	320132	2	RIKEN cDNA A230108P19 gene	ncRNA	0	0	N9 L5b Cdh13	0	0.0571639	0	0	C8 L5 Chrna6	0.124444	0.13072	0
A2m	232345	6	alpha-2-macroglobulin	protein-coding	0	0	N9 L5b Cdh13	0	0	0	0	C2 Sst Cbln4	0.117391	0.0434783	0
A330008L17Rik	234624	8	RIKEN cDNA A330008L17 gene	ncRNA	0	6	N10 L5b Tph2	2.05125	0.443639	1	7	C8 L5 Chrna6	3.24667	0.585607	0.163068
A330009N23Rik	380977	15	RIKEN cDNA A330009N23 gene	ncRNA	0	0	N4 L5a Hsd11b1	10.7858	0.212507	0	7	C3 L4 Arf5	13.0213	0.427604	0.151738
A330015K06Rik	102637797	3	RIKEN cDNA A330015K06 gene	ncRNA	2	7	N2 Sst Cbln4	6.37273	0.571182	2	7	C4 L5a Hsd11b1	2.85579	0.524083	0.412947
A330023F24Rik	320977	1	RIKEN cDNA A330023F24 gene	ncRNA	2	9	N2 Sst Cbln4	178.785	0.0418384	2	9	C3 L4 Arf5	37.5602	0.0561471	1
A330032B11Rik	319931	19	RIKEN cDNA A330032B11 gene	ncRNA	1	1	N7 L6a Mgp	4.03263	0.214344	1	6	C7 L6a Mgp	2.08	0.102955	0.570722
A330033J07Rik	320614	13	RIKEN cDNA A330033J07 gene	ncRNA	0	0	N2 Sst Cbln4	1.56682	0.289133	2	0	C1 Pvalb Wt1	1.12312	0.595056	0.250937
A330035P11Rik	319727	14	RIKEN cDNA A330035P11 gene	ncRNA	0	0	N8 L5 Chrna6	7.17364	0.222442	0	0	C6 L6a Car12	1.33231	0.0618323	0.0294725
A330040F15Rik	74333	19	RIKEN cDNA A330040F15 gene	ncRNA	0	0	N6 L6a Car12	28.5205	0.143763	0	4	C4 L5a Hsd11b1	8.34992	0.31738	0.717516
A330041J22Rik	319556	9	RIKEN cDNA A330041J22 gene	ncRNA	0	0	N11 L6a Sla	4.08094	0.0571676	0	1	C11 L6a Sla	2.51913	0.258599	0.184378
A330048O09Rik	320315	13	RIKEN cDNA A330048O09 gene	ncRNA	0	0	N9 L5b Cdh13	0	0	0	0	C11 L6a Sla	0	0	NA
A330049N07Rik	327768	10	RIKEN cDNA A330049N07 gene	ncRNA	0	0	N3 L4 Arf5	0.0118987	0.0273242	0	0	C4 L5a Hsd11b1	0.00473684	0.0381168	0
A330050F15Rik	320722	17	A kinase (PRKA) anchor inhibitor 1	protein-coding	1	0	N1 Pvalb Wt1	38.0891	0.488234	2	2	C1 Pvalb Wt1	30.5509	0.732441	0.189828
A330069E16Rik	606735	2	RIKEN cDNA A330069E16 gene	ncRNA	0	0	N11 L6a Sla	30.4034	0.121373	1	0	C4 L5a Hsd11b1	8.62421	0.244703	0.213872
A330069K06Rik	213544	3	RIKEN cDNA A330069K06 gene	ncRNA	0	0	N11 L6a Sla	2.71563	0.0329757	0	0	C9 L5b Cdh13	1.2669	0.138308	0.225501
A330070K13Rik	381673	5	RIKEN cDNA A330070K13 gene	protein-coding	0	0	N1 Pvalb Wt1	14.494	0.151662	1	1	C7 L6a Mgp	22.5186	0.589301	0.101834
A330074K22Rik	434353	8	RIKEN cDNA A330074K22 gene	ncRNA	0	0	N8 L5 Chrna6	1.07727	0.122557	0	0	C1 Pvalb Wt1	1.42531	0.24993	0.0946494
A330076C08Rik	100503592	13	RIKEN cDNA A330076C08 gene	ncRNA	0	0	N6 L6a Car12	0.0226829	0.0338983	0	0	C3 L4 Arf5	0.645111	0.0542942	0
A330076H08Rik	320026	7	RIKEN cDNA A330076H08 gene	ncRNA	2	9	N2 Sst Cbln4	599.978	0.210574	2	9	C2 Sst Cbln4	148.176	0.159424	0.926782
A330084C13Rik	381174	18	RIKEN cDNA A330084C13 gene	ncRNA	0	0	N7 L6a Mgp	1.50737	0.110567	0	0	C3 L4 Arf5	0.999667	0.201756	0.456111
A330093E20Rik	107003	18	RIKEN cDNA A330093E20 gene	ncRNA	0	6	N9 L5b Cdh13	64.7335	0.481414	2	7	C8 L5 Chrna6	17.7344	0.386298	0.633414
A330102I10Rik	77920	13	RIKEN cDNA A330102I10 gene	ncRNA	2	9	N11 L6a Sla	55.2488	0.179833	2	9	C11 L6a Sla	29.3196	0.199353	0.633359
A3galt2	215493	4	alpha 1,3-galactosyltransferase 2 (isoglobotriaosylceramide synthase)	protein-coding	0	0	N5 L5a Batf3	0.191111	0.018569	0	0	C4 L5a Hsd11b1	0.123684	0.0539955	0.0531395
A430005L14Rik	97159	4	RIKEN cDNA A430005L14 gene	protein-coding	0	0	N2 Sst Cbln4	25.9632	0.119672	2	8	C1 Pvalb Wt1	52.8044	0.320729	0.120403
A430010J10Rik	319665	6	RIKEN cDNA A430010J10 gene	unknown	0	0	N2 Sst Cbln4	5.81227	0.104967	0	0	C3 L4 Arf5	0.768444	0.29601	0.464531
A430033K04Rik	243308	5	RIKEN cDNA A430033K04 gene	protein-coding	0	0	N7 L6a Mgp	13.2726	0.21123	0	8	C11 L6a Sla	9.09826	0.196314	0.441867
A430035B10Rik	320312	6	RIKEN cDNA A430035B10 gene	ncRNA	0	0	N11 L6a Sla	5.37406	0.0713366	0	0	C3 L4 Arf5	5.02133	0.125126	0.316663
A430046D13Rik	654440	10	Riken cDNA A430046D13 gene	ncRNA	1	5	N11 L6a Sla	10.0609	0.137265	2	9	C4 L5a Hsd11b1	5.81511	0.223539	0.295705
A430048G15Rik	381426	2	RIKEN cDNA A430048G15 gene	unknown	0	0	N9 L5b Cdh13	0	0	0	0	C11 L6a Sla	0	0.0075188	NA
A430057M04Rik	319486	14	RIKEN cDNA A430057M04 gene	protein-coding	0	0	N1 Pvalb Wt1	2.36657	0.153825	2	5	C1 Pvalb Wt1	1.31031	0.514104	0.221178
A430060F13Rik	100039739	11	RIKEN cDNA A430060F13 gene	unknown	0	0	N9 L5b Cdh13	0	0	0	0	C11 L6a Sla	0	0.0405489	NA
A430072P03Rik	414110	5	RIKEN cDNA A430072P03 gene	unknown	0	0	N9 L5b Cdh13	0	0	0	0	C11 L6a Sla	0	0	NA
A430078G23Rik	319493	8	RIKEN cDNA A430078G23 gene	protein-coding	0	0	N1 Pvalb Wt1	0.0137143	0	0	0	C9 L5b Cdh13	0.00793103	0.0434783	0
A430078I02Rik	320486	6	RIKEN cDNA A430078I02 gene	ncRNA	0	0	N6 L6a Car12	1.82537	0.031444	0	0	C3 L4 Arf5	0.209222	0.04358	0.375252
A430085M09Rik	623726	4	RIKEN cDNA A430085M09 gene	ncRNA	0	0	N9 L5b Cdh13	0	0	0	0	C6 L6a Car12	0.0115385	0	0
A430088P11Rik	106059	15	RIKEN cDNA A430088P11 gene	ncRNA	0	0	N3 L4 Arf5	0.899747	0.0480091	0	0	C4 L5a Hsd11b1	0.206992	0.0368687	0.46326
A430089I19Rik	331195	5	RIKEN cDNA A430089I19 gene	protein-coding	0	0	N9 L5b Cdh13	0	0	0	0	C11 L6a Sla	0	0	NA
A430090L17Rik	319803	13	RIKEN cDNA A430090L17 gene	ncRNA	0	0	N8 L5 Chrna6	7.04273	0.249818	0	0	C3 L4 Arf5	2.25144	0.19	0.846472
A430093F15Rik	403202	19	RIKEN cDNA A430093F15 gene	ncRNA	0	0	N4 L5a Hsd11b1	0.683898	0.033557	0	0	C3 L4 Arf5	0.587444	0.0989321	0.102403
A430105I19Rik	214239	2	RIKEN cDNA A430105I19 gene	protein-coding	0	0	N8 L5 Chrna6	2.55455	0.0543852	0	0	C2 Sst Cbln4	0.347826	0.103468	0.428144
A430105J06Rik	77189	1	RIKEN cDNA A430105J06 gene	ncRNA	0	0	N8 L5 Chrna6	0.749091	0.0522934	0	0	C11 L6a Sla	0.485217	0.0944735	0.297
A430108G06Rik	319650	11	RIKEN cDNA A430108G06 gene	ncRNA	0	0	N8 L5 Chrna6	21.1064	0.146386	0	0	C6 L6a Car12	7.665	0.242674	0.3903
A430110L20Rik	329307	1	RIKEN cDNA A430110L20 gene	unknown	0	0	N8 L5 Chrna6	10.6045	0.0491089	0	0	C3 L4 Arf5	2.54111	0.0688623	0.378989
A4galt	239559	15	alpha 1,4-galactosyltransferase	protein-coding	0	0	N3 L4 Arf5	0.110633	0.0462475	0	0	C4 L5a Hsd11b1	0.57391	0.0835859	0.082866
A4gnt	333424	9	alpha-1,4-N-acetylglucosaminyltransferase	protein-coding	0	0	N4 L5a Hsd11b1	0.00661017	0	0	0	C5 L5a Batf3	0.186	0.0542451	0.006841
A530001N23Rik	328265	13	RIKEN cDNA A530001N23 gene	ncRNA	0	0	N4 L5a Hsd11b1	0.671186	0.0298862	0	0	C11 L6a Sla	0	0.0150376	0
A530006G24Rik	381384	2	RIKEN cDNA A530006G24 gene	ncRNA	0	0	N9 L5b Cdh13	0	0	0	0	C11 L6a Sla	0	0	NA
A530010L16Rik	382036	8	RIKEN cDNA A530010L16 gene	unknown	0	0	N9 L5b Cdh13	0	0	0	0	C5 L5a Batf3	0.0042	0	0
A530013C23Rik	329562	2	RIKEN cDNA A530013C23 gene	ncRNA	0	0	N5 L5a Batf3	0.157475	0.0245876	0	0	C3 L4 Arf5	0.172889	0.0481188	0
A530016L24Rik	319942	12	RIKEN cDNA A530016L24 gene	protein-coding	0	0	N2 Sst Cbln4	1.58955	0.0434335	0	0	C4 L5a Hsd11b1	0.133609	0.0447531	0.406956
A530020G20Rik	319839	3	RIKEN cDNA A530020G20 gene	unknown	0	0	N9 L5b Cdh13	0	0	0	0	C11 L6a Sla	0	0	NA
A530021J07Rik	330578	7	Riken cDNA A530021J07 gene	protein-coding	0	0	N4 L5a Hsd11b1	1.77203	0.0149431	0	0	C8 L5 Chrna6	1.51	0.0942556	0.0380305
A530032D15Rik	381287	1	RIKEN cDNA A530032D15Rik gene	protein-coding	0	0	N1 Pvalb Wt1	0.00571429	0.0126582	0	0	C9 L5b Cdh13	0.0127586	0.0366107	0
A530046M15Rik	328190	13	RIKEN cDNA A530046M15 gene	ncRNA	0	0	N6 L6a Car12	1.14951	0.200066	0	2	C4 L5a Hsd11b1	0.942932	0.336731	0.280892
A530050N04Rik	442846	18	RIKEN cDNA A530050N04 gene	ncRNA	0	0	N10 L5b Tph2	3.06813	0.0781666	0	0	C1 Pvalb Wt1	2.0375	0.201011	0.3251
A530053G22Rik	208079	6	RIKEN cDNA A530053G22 gene	ncRNA	0	0	N9 L5b Cdh13	0	0.0408727	0	0	C11 L6a Sla	0	0.0541679	NA
A530054K11Rik	212281	13	zinc finger protein 729a	protein-coding	0	0	N11 L6a Sla	7.62375	0.113576	0	3	C11 L6a Sla	2.62348	0.277897	0.403784
A530058N18Rik	320846	2	RIKEN cDNA A530058N18 gene	ncRNA	1	0	N1 Pvalb Wt1	40.0423	0.590324	2	0	C1 Pvalb Wt1	55.6784	0.788684	0.146112
A530064D06Rik	328830	17	RIKEN cDNA A530064D06 gene	protein-coding	0	0	N4 L5a Hsd11b1	0.00881356	0	0	0	C11 L6a Sla	0	0	0
A530065N20Rik	328263	13	RIKEN cDNA A530046M15 gene	ncRNA	0	0	N2 Sst Cbln4	0.299091	0.0346394	0	0	C4 L5a Hsd11b1	0.292256	0.0634757	0.28541
A530072M11Rik	100415915	4	RIKEN cDNA gene A530072M11	ncRNA	0	0	N11 L6a Sla	6.37344	0.0504722	0	0	C3 L4 Arf5	0.760556	0.104541	0.183784
A530088E08Rik	664702	17	RIKEN cDNA A530088E08 gene	ncRNA	0	0	N3 L4 Arf5	1.81241	0.0200878	0	0	C11 L6a Sla	0	0	0
A530095I07Rik	210373	13	RIKEN cDNA A530095I07 gene	unknown	0	0	N4 L5a Hsd11b1	0.0183051	0	0	0	C4 L5a Hsd11b1	0.338722	0.0383372	0.0195879
A530099J19Rik	319293	13	RIKEN cDNA A530099J19 gene	protein-coding	0	0	N4 L5a Hsd11b1	0.0105085	0	0	0	C11 L6a Sla	0	0	0
A630001G21Rik	319997	1	RIKEN cDNA A630001G21 gene	protein-coding	0	0	N6 L6a Car12	1.57049	0.0307829	0	0	C11 L6a Sla	0	0	0
A630001O12Rik	414091	8	RIKEN cDNA A630001O12 gene	unknown	0	0	N9 L5b Cdh13	0	0	0	0	C2 Sst Cbln4	0.178696	0.0434783	0
A630010A05Rik	545280	16	RIKEN cDNA A630010A05 gene	ncRNA	0	0	N9 L5b Cdh13	0	0.0262052	0	0	C11 L6a Sla	0	0.0309178	NA
A630019I02Rik	408254	13	RIKEN cDNA A630019I02 gene	ncRNA	0	0	N10 L5b Tph2	5.91625	0.0601883	0	0	C7 L6a Mgp	3.26524	0.262403	0.158784
A630020A06	328489	15	uncharacterized A630020A06	ncRNA	0	0	N4 L5a Hsd11b1	0.466271	0.0667181	0	0	C8 L5 Chrna6	0.154444	0.208944	0.228302
A630023A22Rik	105518	14	RIKEN cDNA A630023A22 gene	protein-coding	0	0	N9 L5b Cdh13	0	0	0	0	C11 L6a Sla	0	0	NA
A630023P12Rik	231603	5	RIKEN cDNA A630023P12 gene	ncRNA	0	1	N7 L6a Mgp	22.6442	0.320798	0	6	C7 L6a Mgp	11.64	0.553315	0.247486
A630031M04Rik	320659	4	RIKEN cDNA A630031M04 gene	unknown	0	0	N6 L6a Car12	0.219024	0.0243902	0	0	C6 L6a Car12	0.06	0.192308	0.721386
A630034I12Rik	329790	4	RIKEN cDNA A630034I12 gene	ncRNA	0	0	N4 L5a Hsd11b1	5.9122	0.15982	0	0	C3 L4 Arf5	3.11244	0.178382	0.647975
A630066F11Rik	320642	10	RIKEN cDNA A630066F11 gene	ncRNA	0	0	N8 L5 Chrna6	21.4027	0.193304	2	6	C6 L6a Car12	6.90577	0.473862	0.423004
A630072L19Rik	100038467	12	RIKEN cDNA A630072L19 gene	ncRNA	0	0	N5 L5a Batf3	2.17404	0.0872977	0	0	C4 L5a Hsd11b1	0.695564	0.0810275	0.307053
A630072M18Rik	320770	5	RIKEN cDNA A630072M18 gene	ncRNA	1	4	N7 L6a Mgp	8.65158	0.223507	2	9	C3 L4 Arf5	4.28922	0.200284	0.589071
A630073D07Rik	381819	6	RIKEN cDNA A630073D07 gene	protein-coding	0	0	N9 L5b Cdh13	0	0	0	0	C11 L6a Sla	0	0	NA
A630075F10Rik	100043910	2	RIKEN cDNA A630075F10 gene	ncRNA	0	0	N11 L6a Sla	2.02656	0.226529	0	1	C11 L6a Sla	3.53261	0.632024	0.14532
A630076J17Rik	319929	3	RIKEN cDNA A630076J17 gene	protein-coding	0	0	N3 L4 Arf5	1.88165	0.0126582	0	0	C7 L6a Mgp	0.0957143	0.077908	0
A630077J23Rik	319973	4	RIKEN cDNA A630077J23 gene	ncRNA	0	0	N11 L6a Sla	1.58656	0.0258185	0	0	C11 L6a Sla	0	0.0434783	0
A630081J09Rik	619309	5	mucin 3A, cell surface associated	protein-coding	0	3	N7 L6a Mgp	98.2363	0.337095	0	4	C4 L5a Hsd11b1	12.0096	0.394641	0.955598
A630089N07Rik	320586	16	RIKEN cDNA A630089N07 gene	ncRNA	1	4	N7 L6a Mgp	42.9216	0.287222	2	9	C3 L4 Arf5	13.4766	0.201343	0.794057
A630095E13Rik	235973	9	RIKEN cDNA A630095E13 gene	protein-coding	0	0	N9 L5b Cdh13	0	0	0	0	C11 L6a Sla	0	0	NA
A630095N17Rik	381272	1	RIKEN cDNA A630095N17 gene	protein-coding	0	0	N4 L5a Hsd11b1	0.316441	0.0338983	0	0	C5 L5a Batf3	0.4436	0.082482	0.0661039
A730004F24Rik	320449	1	RIKEN cDNA A730004F24 gene	ncRNA	0	0	N9 L5b Cdh13	0	0	0	0	C11 L6a Sla	0	0.0075188	NA
A730006G06Rik	320638	17	RIKEN cDNA A730006G06 gene	ncRNA	0	0	N10 L5b Tph2	0.460938	0.10005	0	0	C7 L6a Mgp	0.536667	0.195505	0.135526
A730009L09Rik	402727	16	RIKEN cDNA A730009L09 gene	unknown	0	0	N9 L5b Cdh13	0	0	0	0	C11 L6a Sla	0	0	NA
A730011C13Rik	319916	3	RIKEN cDNA A730011C13 gene	unknown	0	0	N8 L5 Chrna6	19.1627	0.157424	0	3	C4 L5a Hsd11b1	1.86737	0.289615	0.737361
A730013G03Rik	320952	1	RIKEN cDNA A730013G03 gene	unknown	0	0	N11 L6a Sla	2.49844	0.0402751	0	0	C2 Sst Cbln4	0.643043	0.12611	0.346681
A730017C20Rik	225583	18	RIKEN cDNA A730017C20 gene	protein-coding	0	4	N11 L6a Sla	53.2875	0.268261	1	9	C11 L6a Sla	59.9474	0.389772	0.348281
A730017L22Rik	613258	2	RIKEN cDNA A730017L22 gene	ncRNA	2	8	N10 L5b Tph2	8.98156	0.279601	2	9	C10 L5b Tph2	4.19556	0.175438	0.568488
A730018C14Rik	100504733	12	RIKEN cDNA A730018C14 gene	ncRNA	0	0	N4 L5a Hsd11b1	1.55085	0.0244961	0	0	C5 L5a Batf3	0.2534	0.0802928	0
A730020E08Rik	100504262	6	RIKEN cDNA A730020E08 gene	ncRNA	0	0	N2 Sst Cbln4	25.9027	0.15025	2	2	C1 Pvalb Wt1	11.7709	0.378929	0.580206
A730020M07Rik	100503044	3	RIKEN cDNA A730020M07 gene	ncRNA	0	0	N9 L5b Cdh13	0	0	0	0	C11 L6a Sla	0	0	NA
A730036I17Rik	329513	2	RIKEN cDNA A730036I17 gene	ncRNA	0	0	N9 L5b Cdh13	0	0	0	0	C11 L6a Sla	0	0.037037	NA
A730043L09Rik	330958	9	RIKEN cDNA A730043L09 gene	ncRNA	0	0	N5 L5a Batf3	0.242626	0.010101	0	0	C2 Sst Cbln4	1.99826	0.0667362	0.00215162
A730049H05Rik	74516	6	RIKEN cDNA A730049H05 gene	unknown	0	0	N9 L5b Cdh13	0	0	0	0	C10 L5b Tph2	0.0540741	0.037037	0
A730056A06Rik	319783	7	RIKEN cDNA A730056A06 gene	ncRNA	0	0	N9 L5b Cdh13	2.55618	0.310647	0	3	C10 L5b Tph2	3.74074	0.612804	0.0766611
A730063M14Rik	100504703	10	RIKEN cDNA A730063M14 gene	ncRNA	0	0	N6 L6a Car12	7.26049	0.130232	0	2	C9 L5b Cdh13	4.47724	0.248384	0.25516
A730067D02Rik	330963	9	ankyrin repeat and death domain containing 1A	protein-coding	0	0	N3 L4 Arf5	0.0691139	0.0383458	0	0	C5 L5a Batf3	0.1852	0.0930949	0.127354
A730082K24Rik	101786	7	RIKEN cDNA A730082K24 gene	ncRNA	0	0	N5 L5a Batf3	0.0040404	0	0	0	C4 L5a Hsd11b1	0.0646617	0.0318818	0
A730085K08Rik	654800	9	RIKEN cDNA A730085K08 gene	ncRNA	0	0	N10 L5b Tph2	0.419687	0.0648207	0	0	C10 L5b Tph2	1.62667	0.119616	0.0493503
A730089K16Rik	320411	5	RIKEN cDNA A730089K16 gene	unknown	0	0	N4 L5a Hsd11b1	1.90441	0.147207	2	0	C2 Sst Cbln4	2.35391	0.336358	0.222952
A730090H04Rik	320453	11	distal-less homeobox 4, opposite strand	ncRNA	0	0	N7 L6a Mgp	19.1505	0.242556	0	1	C7 L6a Mgp	17.2524	0.514695	0.30584
A730090N16Rik	319798	3	RIKEN cDNA A730090N16 gene	ncRNA	1	3	N1 Pvalb Wt1	39.1186	0.368867	2	6	C4 L5a Hsd11b1	8.94962	0.452395	0.838317
A730098P11Rik	624582	16	mortality factor 4 like 1, pseudogene 1	pseudo	0	0	N10 L5b Tph2	0.674687	0.0588009	0	0	C9 L5b Cdh13	0.351379	0.235487	0.261577
A830005F24Rik	442803	13	RIKEN cDNA A830005F24 gene	protein-coding	0	0	N8 L5 Chrna6	19.9155	0.107515	0	0	C1 Pvalb Wt1	6.48375	0.239654	0.28903
A830009L08Rik	320297	13	RIKEN cDNA A830009L08 gene	ncRNA	0	0	N4 L5a Hsd11b1	2.81424	0.176456	0	6	C5 L5a Batf3	6.7844	0.438327	0.115909
A830010M20Rik	231570	5	RIKEN cDNA A830010M20 gene	protein-coding	1	8	N8 L5 Chrna6	39.49	0.184014	2	9	C7 L6a Mgp	51.9405	0.0454342	0.209275
A830011K09Rik	319702	6	RIKEN cDNA A830011K09 gene	ncRNA	0	0	N10 L5b Tph2	7.42375	0.0993485	0	2	C9 L5b Cdh13	2.40828	0.326697	0.31936
A830012C17Rik	319308	4	RIKEN cDNA A830012C17 gene	ncRNA	0	0	N9 L5b Cdh13	0	0.0243902	0	0	C11 L6a Sla	0	0.0314853	NA
A830018L16Rik	320492	1	RIKEN cDNA A830018L16 gene	protein-coding	2	9	N11 L6a Sla	45.16	0.0995509	2	9	C7 L6a Mgp	31.52	0.116039	0.309174
A830019L24Rik	320072	3	RIKEN cDNA A830019L24 gene	ncRNA	0	0	N6 L6a Car12	0.556585	0.0238292	0	0	C5 L5a Batf3	1.9792	0.136898	0.0609399
A830019P07Rik	329056	19	RIKEN cDNA A830019P07 gene	unknown	0	0	N3 L4 Arf5	1.87911	0.0949755	0	0	C4 L5a Hsd11b1	0.658421	0.115529	0.635295
A830021F12Rik	442838	18	RIKEN cDNA A830021F12 gene	protein-coding	0	0	N9 L5b Cdh13	0	0.0513139	0	0	C10 L5b Tph2	0.0718519	0.0357153	0
A830021M18Rik	223483	15	RIKEN cDNA A830021M18 gene	ncRNA	0	0	N6 L6a Car12	9.63195	0.125912	0	0	C6 L6a Car12	5.65385	0.221315	0.298839
A830029E22Rik	320566	3	RIKEN cDNA A830029E22 gene	ncRNA	0	0	N7 L6a Mgp	6.46895	0.041354	0	0	C6 L6a Car12	5.32269	0.146962	0.168863
A830035A12Rik	442842	11	RIKEN cDNA A830035A12 gene	unknown	0	0	N9 L5b Cdh13	0.104706	0.0386146	0	0	C4 L5a Hsd11b1	1.02203	0.0636451	0.00697173
A830035O19Rik	100101457	9	RIKEN cDNA A830035O19 gene	unknown	0	0	N5 L5a Batf3	3.99455	0.100037	0	0	C11 L6a Sla	2.98826	0.218159	0.268041
A830052D11Rik	402767	18	RIKEN cDNA A830052D11 gene	ncRNA	0	0	N8 L5 Chrna6	6.86818	0.0563414	0	0	C3 L4 Arf5	3.47944	0.149638	0.206995
A830082K12Rik	320174	13	RIKEN cDNA A830082K12 gene	ncRNA	2	7	N3 L4 Arf5	35.1695	0.423039	2	8	C3 L4 Arf5	17.831	0.441315	0.541276
A830082N09Rik	414093	10	RIKEN cDNA A830082N09 gene	ncRNA	0	1	N8 L5 Chrna6	10.0691	0.300399	2	5	C3 L4 Arf5	5.44567	0.204992	0.481809
A830092H15Rik	100379095	3	RIKEN cDNA A830092H15 gene	unknown	0	0	N9 L5b Cdh13	4.28588	0.165864	0	2	C3 L4 Arf5	1.66244	0.345431	0.543344
A930001A20Rik	77127	3	RIKEN cDNA A930001A20 gene	ncRNA	0	0	N9 L5b Cdh13	0	0.0271814	0	0	C11 L6a Sla	0	0.047056	NA
A930001C03Rik	319314	19	RIKEN cDNA A930001C03 gene	ncRNA	0	1	N6 L6a Car12	24.6305	0.284128	2	5	C6 L6a Car12	18.255	0.495636	0.241455
A930002C04Rik	319467	13	RIKEN cDNA A930002C04 gene	ncRNA	0	0	N3 L4 Arf5	7.39443	0.130061	0	0	C11 L6a Sla	5.74	0.241132	0.342052
A930003A15Rik	68162	16	RIKEN cDNA A930003A15 gene	ncRNA	0	0	N9 L5b Cdh13	0	0	0	0	C2 Sst Cbln4	5.2013	0.157615	0
A930003O13Rik	330052	5	RIKEN cDNA A930003O13 gene	ncRNA	0	0	N2 Sst Cbln4	9.96364	0.182531	1	0	C2 Sst Cbln4	3.09652	0.286783	0.556141
A930004D18Rik	77940	2	RIKEN cDNA A930004D18 gene	ncRNA	0	0	N1 Pvalb Wt1	2.87629	0.11252	1	4	C1 Pvalb Wt1	2.07344	0.349105	0.291056
A930005H10Rik	68161	3	RIKEN cDNA A930005H10 gene	ncRNA	0	0	N10 L5b Tph2	21.6191	0.169354	2	8	C7 L6a Mgp	14.3957	0.310619	0.227936
A930006I01Rik	319854	2	RIKEN cDNA A930006I01 gene	ncRNA	0	0	N9 L5b Cdh13	0	0.0243902	0	0	C11 L6a Sla	0	0	NA
A930006K02Rik	100503120	16	RIKEN cDNA A930006K02 gene	ncRNA	0	0	N11 L6a Sla	6.135	0.0634225	0	0	C11 L6a Sla	6.59304	0.124946	0.359284
A930007A09Rik	432999	16	RIKEN cDNA A930007A09 gene	unknown	0	0	N11 L6a Sla	2.58625	0.0594859	0	0	C9 L5b Cdh13	0.808621	0.142399	0.144233
A930007I19Rik	77779	19	RIKEN cDNA A930007I19 gene	ncRNA	0	0	N3 L4 Arf5	0.847342	0.202335	0	0	C3 L4 Arf5	0.404	0.168397	0.55438
[truncated: 40,004 more rows]
